# Supplementary material for: Transcriptome reconstruction and functional analysis of eukaryotic marine plankton communities via high-throughput metagenomics and metatranscriptomics
Source: HighWire-hosted journal article supplement (doi:10.1101/gr.253070.119), 2020-03-23
Supplement: Supplemental_Dataset_S1.xlsx [file Supplemental_Dataset_S1.xlsx]

## Sheet: Sample_Description
Supplemental Dataset S1 – Major statistical characteristics of the MGT collection and distribution of the MGTs across samples collected from the Tara Oceans expedition (http://www.genoscope.cns.fr/tara/).
Sample label (Tara Oceans ID)	Station label (TARA_station#)	Method label (protocol-label_size-fraction)	Sample material label (TARA_station#_depth_size-fraction)	Marine biome (Longhurst 2007) terms registered at www.marineregions.org	Ocean and sea region	Biogeographical province (Longhurst 2007) terms registered at www.marineregions.org	Depth Label terms registered at EnvO, the Environmental Ontology (http://environmentontology.org/)	Date/Time (yyyy-mm-ddThh:mm)	Latitude (degree N)	Longitude (degree E)	Depth (m)	Local Date (yyy-mm-dd)	Local solar time (hh:mm)	Temperature (°C)	Salinity (mg/m3)	Oxygen (µmol/L)	Nitrates (µmol/L)	Chlorophyll (µmol/L)	Phosphates (µmol/L)	Distance to coast (km)	NPP	NO2NO3 (mmol/m3)	Iron (µmol/m3)	NH4 (mmol/m3)	Additional environmental context about depth specific features (url)	Additional environmental context about mesoscale features (url)	Additional environmental context about water column features (url)	Additional methodological context (url)
TARA_X000000408	TARA_004	SEQ-(100L-or-15min)_W0.8-5	TARA_004_DCM_0.8-5	Westerlies Biome	[NAO] North Atlantic Ocean	[NAST-E] North Atlantic Subtropical Gyral Province (MRGID:21467)	[DCM] deep chlorophyll maximum layer (ENVO:01000326)	2009-09-15T18:00	36,5533	-6,5669	38,69	2009-09-15	17:38	16,25	36,56	NA	NA	0,88	NA	16,85	NA	NA	1228	0,35	https://ws.pangaea.de/dds-fdp/rest/panquery?datasetDOI=doi.pangaea.de/10.1594/PANGAEA.853810&filterParameterValue=1,TARA_X000000408	https://ws.pangaea.de/dds-fdp/rest/panquery?datasetDOI=doi.pangaea.de/10.1594/PANGAEA.858201&filterParameterValue=1,TARA_X000000408	https://ws.pangaea.de/dds-fdp/rest/panquery?datasetDOI=doi.pangaea.de/10.1594/PANGAEA.858207&filterParameterValue=1,TARA_X000000408	https://ws.pangaea.de/dds-fdp/rest/panquery?datasetDOI=doi.pangaea.de/10.1594/PANGAEA.842197&filterParameterValue=1,TARA_X000000408
TARA_X000000410	TARA_004	SEQ-(500mL-or-15min)_W5-20	TARA_004_DCM_5-20	Westerlies Biome	[NAO] North Atlantic Ocean	[NAST-E] North Atlantic Subtropical Gyral Province (MRGID:21467)	[DCM] deep chlorophyll maximum layer (ENVO:01000326)	2009-09-15T18:00	36,5533	-6,5669	38,69	2009-09-15	17:38	16,25	36,56	NA	NA	0,88	NA	16,85	NA	NA	1228	0,35	https://ws.pangaea.de/dds-fdp/rest/panquery?datasetDOI=doi.pangaea.de/10.1594/PANGAEA.853810&filterParameterValue=1,TARA_X000000410	https://ws.pangaea.de/dds-fdp/rest/panquery?datasetDOI=doi.pangaea.de/10.1594/PANGAEA.858201&filterParameterValue=1,TARA_X000000410	https://ws.pangaea.de/dds-fdp/rest/panquery?datasetDOI=doi.pangaea.de/10.1594/PANGAEA.858207&filterParameterValue=1,TARA_X000000410	https://ws.pangaea.de/dds-fdp/rest/panquery?datasetDOI=doi.pangaea.de/10.1594/PANGAEA.842197&filterParameterValue=1,TARA_X000000410
TARA_X000000323	TARA_004	SEQ-(100L-or-15min)_W0.8-5	TARA_004_SRF_0.8-5	Westerlies Biome	[NAO] North Atlantic Ocean	[NAST-E] North Atlantic Subtropical Gyral Province (MRGID:21467)	[SRF] surface water layer (ENVO:00010504)	2009-09-15T11:30	36,5533	-6,5669	5,12	2009-09-16	11:08	20,34	36,63	NA	NA	0,10	NA	16,85	686,09	NA	1388	0,40	https://ws.pangaea.de/dds-fdp/rest/panquery?datasetDOI=doi.pangaea.de/10.1594/PANGAEA.853810&filterParameterValue=1,TARA_X000000323	https://ws.pangaea.de/dds-fdp/rest/panquery?datasetDOI=doi.pangaea.de/10.1594/PANGAEA.858201&filterParameterValue=1,TARA_X000000323	https://ws.pangaea.de/dds-fdp/rest/panquery?datasetDOI=doi.pangaea.de/10.1594/PANGAEA.858207&filterParameterValue=1,TARA_X000000323	https://ws.pangaea.de/dds-fdp/rest/panquery?datasetDOI=doi.pangaea.de/10.1594/PANGAEA.842197&filterParameterValue=1,TARA_X000000323
TARA_X000000357	TARA_004	SEQ-(500mL-or-15min)_N180-2000	TARA_004_SRF_180-2000	Westerlies Biome	[NAO] North Atlantic Ocean	[NAST-E] North Atlantic Subtropical Gyral Province (MRGID:21467)	[SRF] surface water layer (ENVO:00010504)	2009-09-15T15:00	36,5533	-6,5669	5,12	2009-09-15	14:38	20,34	36,63	NA	NA	0,10	NA	16,85	686,09	NA	1388	0,40	https://ws.pangaea.de/dds-fdp/rest/panquery?datasetDOI=doi.pangaea.de/10.1594/PANGAEA.853810&filterParameterValue=1,TARA_X000000357	https://ws.pangaea.de/dds-fdp/rest/panquery?datasetDOI=doi.pangaea.de/10.1594/PANGAEA.858201&filterParameterValue=1,TARA_X000000357	https://ws.pangaea.de/dds-fdp/rest/panquery?datasetDOI=doi.pangaea.de/10.1594/PANGAEA.858207&filterParameterValue=1,TARA_X000000357	https://ws.pangaea.de/dds-fdp/rest/panquery?datasetDOI=doi.pangaea.de/10.1594/PANGAEA.842197&filterParameterValue=1,TARA_X000000357
TARA_X000000325	TARA_004	SEQ-(500mL-or-15min)_W5-20	TARA_004_SRF_5-20	Westerlies Biome	[NAO] North Atlantic Ocean	[NAST-E] North Atlantic Subtropical Gyral Province (MRGID:21467)	[SRF] surface water layer (ENVO:00010504)	2009-09-15T11:30	36,5533	-6,5669	5,12	2009-09-16	11:08	20,34	36,63	NA	NA	0,10	NA	16,85	686,09	NA	1388	0,40	https://ws.pangaea.de/dds-fdp/rest/panquery?datasetDOI=doi.pangaea.de/10.1594/PANGAEA.853810&filterParameterValue=1,TARA_X000000325	https://ws.pangaea.de/dds-fdp/rest/panquery?datasetDOI=doi.pangaea.de/10.1594/PANGAEA.858201&filterParameterValue=1,TARA_X000000325	https://ws.pangaea.de/dds-fdp/rest/panquery?datasetDOI=doi.pangaea.de/10.1594/PANGAEA.858207&filterParameterValue=1,TARA_X000000325	https://ws.pangaea.de/dds-fdp/rest/panquery?datasetDOI=doi.pangaea.de/10.1594/PANGAEA.842197&filterParameterValue=1,TARA_X000000325
TARA_A200000158	TARA_007	SEQ-(100L-or-15min)_W0.8-5	TARA_007_DCM_0.8-5	Westerlies Biome	[MS] Mediterranean Sea	[MEDI] Mediterranean Sea, Black Sea Province (MRGID:21465)	[DCM] deep chlorophyll maximum layer (ENVO:01000326)	2009-09-23T16:08	37,0541	1,9478	45,00	2009-09-23	16:23	17,17	37,10	NA	NA	0,30	0,01	49,15	354,22	0,03	1226	0,19	https://ws.pangaea.de/dds-fdp/rest/panquery?datasetDOI=doi.pangaea.de/10.1594/PANGAEA.853810&filterParameterValue=1,TARA_A200000158	https://ws.pangaea.de/dds-fdp/rest/panquery?datasetDOI=doi.pangaea.de/10.1594/PANGAEA.858201&filterParameterValue=1,TARA_A200000158	https://ws.pangaea.de/dds-fdp/rest/panquery?datasetDOI=doi.pangaea.de/10.1594/PANGAEA.858207&filterParameterValue=1,TARA_A200000158	https://ws.pangaea.de/dds-fdp/rest/panquery?datasetDOI=doi.pangaea.de/10.1594/PANGAEA.842197&filterParameterValue=1,TARA_A200000158
TARA_A200000102	TARA_007	SEQ-(500mL-or-15min)_N20-180	TARA_007_DCM_20-180	Westerlies Biome	[MS] Mediterranean Sea	[MEDI] Mediterranean Sea, Black Sea Province (MRGID:21465)	[DCM] deep chlorophyll maximum layer (ENVO:01000326)	2009-09-23T18:32	37,0112	1946	45,00	2009-09-23	18:47	17,17	37,10	NA	NA	0,30	0,01	49,15	354,22	0,03	1226	0,19	https://ws.pangaea.de/dds-fdp/rest/panquery?datasetDOI=doi.pangaea.de/10.1594/PANGAEA.853810&filterParameterValue=1,TARA_A200000102	https://ws.pangaea.de/dds-fdp/rest/panquery?datasetDOI=doi.pangaea.de/10.1594/PANGAEA.858201&filterParameterValue=1,TARA_A200000102	https://ws.pangaea.de/dds-fdp/rest/panquery?datasetDOI=doi.pangaea.de/10.1594/PANGAEA.858207&filterParameterValue=1,TARA_A200000102	https://ws.pangaea.de/dds-fdp/rest/panquery?datasetDOI=doi.pangaea.de/10.1594/PANGAEA.842197&filterParameterValue=1,TARA_A200000102
TARA_A200000179	TARA_007	SEQ-(500mL-or-15min)_N20-180	TARA_007_DCM_20-180	Westerlies Biome	[MS] Mediterranean Sea	[MEDI] Mediterranean Sea, Black Sea Province (MRGID:21465)	[DCM] deep chlorophyll maximum layer (ENVO:01000326)	2009-09-23T18:32	37,0112	1946	45,00	2009-09-23	18:47	17,17	37,10	NA	NA	0,30	0,01	49,15	354,22	0,03	1226	0,19	https://ws.pangaea.de/dds-fdp/rest/panquery?datasetDOI=doi.pangaea.de/10.1594/PANGAEA.853810&filterParameterValue=1,TARA_A200000179	https://ws.pangaea.de/dds-fdp/rest/panquery?datasetDOI=doi.pangaea.de/10.1594/PANGAEA.858201&filterParameterValue=1,TARA_A200000179	https://ws.pangaea.de/dds-fdp/rest/panquery?datasetDOI=doi.pangaea.de/10.1594/PANGAEA.858207&filterParameterValue=1,TARA_A200000179	https://ws.pangaea.de/dds-fdp/rest/panquery?datasetDOI=doi.pangaea.de/10.1594/PANGAEA.842197&filterParameterValue=1,TARA_A200000179
TARA_A200000148	TARA_007	SEQ-(500mL-or-15min)_W5-20	TARA_007_DCM_5-20	Westerlies Biome	[MS] Mediterranean Sea	[MEDI] Mediterranean Sea, Black Sea Province (MRGID:21465)	[DCM] deep chlorophyll maximum layer (ENVO:01000326)	2009-09-23T16:08	37,0541	1,9478	45,00	2009-09-23	16:23	17,17	37,10	NA	NA	0,30	0,01	49,15	354,22	0,03	1226	0,19	https://ws.pangaea.de/dds-fdp/rest/panquery?datasetDOI=doi.pangaea.de/10.1594/PANGAEA.853810&filterParameterValue=1,TARA_A200000148	https://ws.pangaea.de/dds-fdp/rest/panquery?datasetDOI=doi.pangaea.de/10.1594/PANGAEA.858201&filterParameterValue=1,TARA_A200000148	https://ws.pangaea.de/dds-fdp/rest/panquery?datasetDOI=doi.pangaea.de/10.1594/PANGAEA.858207&filterParameterValue=1,TARA_A200000148	https://ws.pangaea.de/dds-fdp/rest/panquery?datasetDOI=doi.pangaea.de/10.1594/PANGAEA.842197&filterParameterValue=1,TARA_A200000148
TARA_A200000150	TARA_007	SEQ-(500mL-or-15min)_W5-20	TARA_007_DCM_5-20	Westerlies Biome	[MS] Mediterranean Sea	[MEDI] Mediterranean Sea, Black Sea Province (MRGID:21465)	[DCM] deep chlorophyll maximum layer (ENVO:01000326)	2009-09-23T16:08	37,0541	1,9478	45,00	2009-09-23	16:23	17,17	37,10	NA	NA	0,30	0,01	49,15	354,22	0,03	1226	0,19	https://ws.pangaea.de/dds-fdp/rest/panquery?datasetDOI=doi.pangaea.de/10.1594/PANGAEA.853810&filterParameterValue=1,TARA_A200000150	https://ws.pangaea.de/dds-fdp/rest/panquery?datasetDOI=doi.pangaea.de/10.1594/PANGAEA.858201&filterParameterValue=1,TARA_A200000150	https://ws.pangaea.de/dds-fdp/rest/panquery?datasetDOI=doi.pangaea.de/10.1594/PANGAEA.858207&filterParameterValue=1,TARA_A200000150	https://ws.pangaea.de/dds-fdp/rest/panquery?datasetDOI=doi.pangaea.de/10.1594/PANGAEA.842197&filterParameterValue=1,TARA_A200000150
TARA_A200000123	TARA_007	SEQ-(100L-or-15min)_W0.8-5	TARA_007_SRF_0.8-5	Westerlies Biome	[MS] Mediterranean Sea	[MEDI] Mediterranean Sea, Black Sea Province (MRGID:21465)	[SRF] surface water layer (ENVO:00010504)	2009-09-23T12:50	37051	1,9378	7,50	2009-09-23	13:05	23,79	37,54	NA	NA	0,03	0,06	49,15	354,22	0,03	1388	0,13	https://ws.pangaea.de/dds-fdp/rest/panquery?datasetDOI=doi.pangaea.de/10.1594/PANGAEA.853810&filterParameterValue=1,TARA_A200000123	https://ws.pangaea.de/dds-fdp/rest/panquery?datasetDOI=doi.pangaea.de/10.1594/PANGAEA.858201&filterParameterValue=1,TARA_A200000123	https://ws.pangaea.de/dds-fdp/rest/panquery?datasetDOI=doi.pangaea.de/10.1594/PANGAEA.858207&filterParameterValue=1,TARA_A200000123	https://ws.pangaea.de/dds-fdp/rest/panquery?datasetDOI=doi.pangaea.de/10.1594/PANGAEA.842197&filterParameterValue=1,TARA_A200000123
TARA_A200000139	TARA_007	SEQ-(500mL-or-15min)_N20-180	TARA_007_SRF_20-180	Westerlies Biome	[MS] Mediterranean Sea	[MEDI] Mediterranean Sea, Black Sea Province (MRGID:21465)	[SRF] surface water layer (ENVO:00010504)	2009-09-23T14:39	37,0299	1,9575	7,50	2009-09-23	14:54	23,79	37,54	NA	NA	0,03	0,06	49,15	354,22	0,03	1388	0,13	https://ws.pangaea.de/dds-fdp/rest/panquery?datasetDOI=doi.pangaea.de/10.1594/PANGAEA.853810&filterParameterValue=1,TARA_A200000139	https://ws.pangaea.de/dds-fdp/rest/panquery?datasetDOI=doi.pangaea.de/10.1594/PANGAEA.858201&filterParameterValue=1,TARA_A200000139	https://ws.pangaea.de/dds-fdp/rest/panquery?datasetDOI=doi.pangaea.de/10.1594/PANGAEA.858207&filterParameterValue=1,TARA_A200000139	https://ws.pangaea.de/dds-fdp/rest/panquery?datasetDOI=doi.pangaea.de/10.1594/PANGAEA.842197&filterParameterValue=1,TARA_A200000139
TARA_X000001040	TARA_009	SEQ-(100L-or-15min)_W0.8-5	TARA_009_DCM_0.8-5	Westerlies Biome	[MS] Mediterranean Sea	[MEDI] Mediterranean Sea, Black Sea Province (MRGID:21465)	[DCM] deep chlorophyll maximum layer (ENVO:01000326)	2009-09-28T16:59	39,0609	5,9422	60,00	2009-09-28	17:32	15,95	37,94	NA	NA	0,41	0,02	157,40	205,12	0,08	1262	0,17	https://ws.pangaea.de/dds-fdp/rest/panquery?datasetDOI=doi.pangaea.de/10.1594/PANGAEA.853810&filterParameterValue=1,TARA_X000001040	https://ws.pangaea.de/dds-fdp/rest/panquery?datasetDOI=doi.pangaea.de/10.1594/PANGAEA.858201&filterParameterValue=1,TARA_X000001040	https://ws.pangaea.de/dds-fdp/rest/panquery?datasetDOI=doi.pangaea.de/10.1594/PANGAEA.858207&filterParameterValue=1,TARA_X000001040	https://ws.pangaea.de/dds-fdp/rest/panquery?datasetDOI=doi.pangaea.de/10.1594/PANGAEA.842197&filterParameterValue=1,TARA_X000001040
TARA_X000001043	TARA_009	SEQ-(500mL-or-15min)_W5-20	TARA_009_DCM_5-20	Westerlies Biome	[MS] Mediterranean Sea	[MEDI] Mediterranean Sea, Black Sea Province (MRGID:21465)	[DCM] deep chlorophyll maximum layer (ENVO:01000326)	2009-09-28T16:59	39,0609	5,9422	60,00	2009-09-28	17:32	15,95	37,94	NA	NA	0,41	0,02	157,40	205,12	0,08	1262	0,17	https://ws.pangaea.de/dds-fdp/rest/panquery?datasetDOI=doi.pangaea.de/10.1594/PANGAEA.853810&filterParameterValue=1,TARA_X000001043	https://ws.pangaea.de/dds-fdp/rest/panquery?datasetDOI=doi.pangaea.de/10.1594/PANGAEA.858201&filterParameterValue=1,TARA_X000001043	https://ws.pangaea.de/dds-fdp/rest/panquery?datasetDOI=doi.pangaea.de/10.1594/PANGAEA.858207&filterParameterValue=1,TARA_X000001043	https://ws.pangaea.de/dds-fdp/rest/panquery?datasetDOI=doi.pangaea.de/10.1594/PANGAEA.842197&filterParameterValue=1,TARA_X000001043
TARA_X000000954	TARA_009	SEQ-(100L-or-15min)_W0.8-5	TARA_009_SRF_0.8-5	Westerlies Biome	[MS] Mediterranean Sea	[MEDI] Mediterranean Sea, Black Sea Province (MRGID:21465)	[SRF] surface water layer (ENVO:00010504)	2009-09-28T12:18	39,1633	5916	7,50	2009-09-28	12:51	24,50	37,81	NA	NA	NA	0,02	157,40	205,12	0,03	1388	0,21	https://ws.pangaea.de/dds-fdp/rest/panquery?datasetDOI=doi.pangaea.de/10.1594/PANGAEA.853810&filterParameterValue=1,TARA_X000000954	https://ws.pangaea.de/dds-fdp/rest/panquery?datasetDOI=doi.pangaea.de/10.1594/PANGAEA.858201&filterParameterValue=1,TARA_X000000954	https://ws.pangaea.de/dds-fdp/rest/panquery?datasetDOI=doi.pangaea.de/10.1594/PANGAEA.858207&filterParameterValue=1,TARA_X000000954	https://ws.pangaea.de/dds-fdp/rest/panquery?datasetDOI=doi.pangaea.de/10.1594/PANGAEA.842197&filterParameterValue=1,TARA_X000000954
TARA_X000001006	TARA_009	SEQ-(500mL-or-15min)_N180-2000	TARA_009_SRF_180-2000	Westerlies Biome	[MS] Mediterranean Sea	[MEDI] Mediterranean Sea, Black Sea Province (MRGID:21465)	[SRF] surface water layer (ENVO:00010504)	2009-09-28T15:08	39,0856	5,7927	7,50	2009-09-28	15:40	24,50	37,81	NA	NA	NA	0,02	157,40	205,12	0,03	1388	0,21	https://ws.pangaea.de/dds-fdp/rest/panquery?datasetDOI=doi.pangaea.de/10.1594/PANGAEA.853810&filterParameterValue=1,TARA_X000001006	https://ws.pangaea.de/dds-fdp/rest/panquery?datasetDOI=doi.pangaea.de/10.1594/PANGAEA.858201&filterParameterValue=1,TARA_X000001006	https://ws.pangaea.de/dds-fdp/rest/panquery?datasetDOI=doi.pangaea.de/10.1594/PANGAEA.858207&filterParameterValue=1,TARA_X000001006	https://ws.pangaea.de/dds-fdp/rest/panquery?datasetDOI=doi.pangaea.de/10.1594/PANGAEA.842197&filterParameterValue=1,TARA_X000001006
TARA_X000001288	TARA_011	SEQ-(100L-or-15min)_W0.8-5	TARA_011_SRF_0.8-5	Westerlies Biome	[MS] Mediterranean Sea	[MEDI] Mediterranean Sea, Black Sea Province (MRGID:21465)	[SRF] surface water layer (ENVO:00010504)	2009-10-04T08:30	41,6686	2,7996	NA	2009-10-05	08:52	NA	NA	NA	NA	NA	NA	NA	NA	NA	NA	NA	https://ws.pangaea.de/dds-fdp/rest/panquery?datasetDOI=doi.pangaea.de/10.1594/PANGAEA.853810&filterParameterValue=1,TARA_X000001288	https://ws.pangaea.de/dds-fdp/rest/panquery?datasetDOI=doi.pangaea.de/10.1594/PANGAEA.858201&filterParameterValue=1,TARA_X000001288	https://ws.pangaea.de/dds-fdp/rest/panquery?datasetDOI=doi.pangaea.de/10.1594/PANGAEA.858207&filterParameterValue=1,TARA_X000001288	https://ws.pangaea.de/dds-fdp/rest/panquery?datasetDOI=doi.pangaea.de/10.1594/PANGAEA.842197&filterParameterValue=1,TARA_X000001288
TARA_X000001334	TARA_011	SEQ-(500mL-or-15min)_N180-2000	TARA_011_SRF_180-2000	Westerlies Biome	[MS] Mediterranean Sea	[MEDI] Mediterranean Sea, Black Sea Province (MRGID:21465)	[SRF] surface water layer (ENVO:00010504)	2009-10-04T14:16	41,6666	2,7962	NA	2009-10-04	14:38	NA	NA	NA	NA	NA	NA	NA	NA	NA	NA	NA	https://ws.pangaea.de/dds-fdp/rest/panquery?datasetDOI=doi.pangaea.de/10.1594/PANGAEA.853810&filterParameterValue=1,TARA_X000001334	https://ws.pangaea.de/dds-fdp/rest/panquery?datasetDOI=doi.pangaea.de/10.1594/PANGAEA.858201&filterParameterValue=1,TARA_X000001334	https://ws.pangaea.de/dds-fdp/rest/panquery?datasetDOI=doi.pangaea.de/10.1594/PANGAEA.858207&filterParameterValue=1,TARA_X000001334	https://ws.pangaea.de/dds-fdp/rest/panquery?datasetDOI=doi.pangaea.de/10.1594/PANGAEA.842197&filterParameterValue=1,TARA_X000001334
TARA_X000001338	TARA_011	SEQ-(500mL-or-15min)_N20-180	TARA_011_SRF_20-180	Westerlies Biome	[MS] Mediterranean Sea	[MEDI] Mediterranean Sea, Black Sea Province (MRGID:21465)	[SRF] surface water layer (ENVO:00010504)	2009-10-04T15:30	41,6663	2,7994	NA	2009-10-04	15:52	NA	NA	NA	NA	NA	NA	NA	NA	NA	NA	NA	https://ws.pangaea.de/dds-fdp/rest/panquery?datasetDOI=doi.pangaea.de/10.1594/PANGAEA.853810&filterParameterValue=1,TARA_X000001338	https://ws.pangaea.de/dds-fdp/rest/panquery?datasetDOI=doi.pangaea.de/10.1594/PANGAEA.858201&filterParameterValue=1,TARA_X000001338	https://ws.pangaea.de/dds-fdp/rest/panquery?datasetDOI=doi.pangaea.de/10.1594/PANGAEA.858207&filterParameterValue=1,TARA_X000001338	https://ws.pangaea.de/dds-fdp/rest/panquery?datasetDOI=doi.pangaea.de/10.1594/PANGAEA.842197&filterParameterValue=1,TARA_X000001338
TARA_X000001286	TARA_011	SEQ-(500mL-or-15min)_W5-20	TARA_011_SRF_5-20	Westerlies Biome	[MS] Mediterranean Sea	[MEDI] Mediterranean Sea, Black Sea Province (MRGID:21465)	[SRF] surface water layer (ENVO:00010504)	2009-10-04T08:30	41,6686	2,7996	NA	2009-10-05	08:52	NA	NA	NA	NA	NA	NA	NA	NA	NA	NA	NA	https://ws.pangaea.de/dds-fdp/rest/panquery?datasetDOI=doi.pangaea.de/10.1594/PANGAEA.853810&filterParameterValue=1,TARA_X000001286	https://ws.pangaea.de/dds-fdp/rest/panquery?datasetDOI=doi.pangaea.de/10.1594/PANGAEA.858201&filterParameterValue=1,TARA_X000001286	https://ws.pangaea.de/dds-fdp/rest/panquery?datasetDOI=doi.pangaea.de/10.1594/PANGAEA.858207&filterParameterValue=1,TARA_X000001286	https://ws.pangaea.de/dds-fdp/rest/panquery?datasetDOI=doi.pangaea.de/10.1594/PANGAEA.842197&filterParameterValue=1,TARA_X000001286
TARA_A100000604	TARA_018	SEQ-(100L-or-15min)_W0.8-5	TARA_018_DCM_0.8-5	Westerlies Biome	[MS] Mediterranean Sea	[MEDI] Mediterranean Sea, Black Sea Province (MRGID:21465)	[DCM] deep chlorophyll maximum layer (ENVO:01000326)	2009-11-02T14:07	35,7528	14,2765	61,64	2009-11-02	15:20	18,37	NA	NA	NA	0,13	NA	NA	331,79	0,02	13000	0,05	https://ws.pangaea.de/dds-fdp/rest/panquery?datasetDOI=doi.pangaea.de/10.1594/PANGAEA.853810&filterParameterValue=1,TARA_A100000604	https://ws.pangaea.de/dds-fdp/rest/panquery?datasetDOI=doi.pangaea.de/10.1594/PANGAEA.858201&filterParameterValue=1,TARA_A100000604	https://ws.pangaea.de/dds-fdp/rest/panquery?datasetDOI=doi.pangaea.de/10.1594/PANGAEA.858207&filterParameterValue=1,TARA_A100000604	https://ws.pangaea.de/dds-fdp/rest/panquery?datasetDOI=doi.pangaea.de/10.1594/PANGAEA.842197&filterParameterValue=1,TARA_A100000604
TARA_A100000589	TARA_018	SEQ-(500mL-or-15min)_N20-180	TARA_018_DCM_20-180	Westerlies Biome	[MS] Mediterranean Sea	[MEDI] Mediterranean Sea, Black Sea Province (MRGID:21465)	[DCM] deep chlorophyll maximum layer (ENVO:01000326)	2009-11-02T14:15	35,7528	14,2765	61,64	2009-11-02	15:28	18,37	NA	NA	NA	0,13	NA	NA	331,79	0,02	13000	0,05	https://ws.pangaea.de/dds-fdp/rest/panquery?datasetDOI=doi.pangaea.de/10.1594/PANGAEA.853810&filterParameterValue=1,TARA_A100000589	https://ws.pangaea.de/dds-fdp/rest/panquery?datasetDOI=doi.pangaea.de/10.1594/PANGAEA.858201&filterParameterValue=1,TARA_A100000589	https://ws.pangaea.de/dds-fdp/rest/panquery?datasetDOI=doi.pangaea.de/10.1594/PANGAEA.858207&filterParameterValue=1,TARA_A100000589	https://ws.pangaea.de/dds-fdp/rest/panquery?datasetDOI=doi.pangaea.de/10.1594/PANGAEA.842197&filterParameterValue=1,TARA_A100000589
TARA_A100000602	TARA_018	SEQ-(500mL-or-15min)_W5-20	TARA_018_DCM_5-20	Westerlies Biome	[MS] Mediterranean Sea	[MEDI] Mediterranean Sea, Black Sea Province (MRGID:21465)	[DCM] deep chlorophyll maximum layer (ENVO:01000326)	2009-11-02T14:07	35,7528	14,2765	61,64	2009-11-02	15:20	18,37	NA	NA	NA	0,13	NA	NA	331,79	0,02	13000	0,05	https://ws.pangaea.de/dds-fdp/rest/panquery?datasetDOI=doi.pangaea.de/10.1594/PANGAEA.853810&filterParameterValue=1,TARA_A100000602	https://ws.pangaea.de/dds-fdp/rest/panquery?datasetDOI=doi.pangaea.de/10.1594/PANGAEA.858201&filterParameterValue=1,TARA_A100000602	https://ws.pangaea.de/dds-fdp/rest/panquery?datasetDOI=doi.pangaea.de/10.1594/PANGAEA.858207&filterParameterValue=1,TARA_A100000602	https://ws.pangaea.de/dds-fdp/rest/panquery?datasetDOI=doi.pangaea.de/10.1594/PANGAEA.842197&filterParameterValue=1,TARA_A100000602
TARA_A100000595	TARA_018	SEQ-(100L-or-15min)_W0.8-5	TARA_018_SRF_0.8-5	Westerlies Biome	[MS] Mediterranean Sea	[MEDI] Mediterranean Sea, Black Sea Province (MRGID:21465)	[SRF] surface water layer (ENVO:00010504)	2009-11-02T08:13	35759	14,2574	5,43	2009-11-03	09:26	21,44	NA	NA	NA	0,05	NA	NA	331,79	0,12	26000	0,21	https://ws.pangaea.de/dds-fdp/rest/panquery?datasetDOI=doi.pangaea.de/10.1594/PANGAEA.853810&filterParameterValue=1,TARA_A100000595	https://ws.pangaea.de/dds-fdp/rest/panquery?datasetDOI=doi.pangaea.de/10.1594/PANGAEA.858201&filterParameterValue=1,TARA_A100000595	https://ws.pangaea.de/dds-fdp/rest/panquery?datasetDOI=doi.pangaea.de/10.1594/PANGAEA.858207&filterParameterValue=1,TARA_A100000595	https://ws.pangaea.de/dds-fdp/rest/panquery?datasetDOI=doi.pangaea.de/10.1594/PANGAEA.842197&filterParameterValue=1,TARA_A100000595
TARA_A100000596	TARA_018	SEQ-(500mL-or-15min)_N20-180	TARA_018_SRF_20-180	Westerlies Biome	[MS] Mediterranean Sea	[MEDI] Mediterranean Sea, Black Sea Province (MRGID:21465)	[SRF] surface water layer (ENVO:00010504)	2009-11-02T10:31	35,7444	14,3083	5,43	2009-11-03	11:44	21,44	NA	NA	NA	0,05	NA	NA	331,79	0,12	26000	0,21	https://ws.pangaea.de/dds-fdp/rest/panquery?datasetDOI=doi.pangaea.de/10.1594/PANGAEA.853810&filterParameterValue=1,TARA_A100000596	https://ws.pangaea.de/dds-fdp/rest/panquery?datasetDOI=doi.pangaea.de/10.1594/PANGAEA.858201&filterParameterValue=1,TARA_A100000596	https://ws.pangaea.de/dds-fdp/rest/panquery?datasetDOI=doi.pangaea.de/10.1594/PANGAEA.858207&filterParameterValue=1,TARA_A100000596	https://ws.pangaea.de/dds-fdp/rest/panquery?datasetDOI=doi.pangaea.de/10.1594/PANGAEA.842197&filterParameterValue=1,TARA_A100000596
TARA_A100000598	TARA_018	SEQ-(500mL-or-15min)_W5-20	TARA_018_SRF_5-20	Westerlies Biome	[MS] Mediterranean Sea	[MEDI] Mediterranean Sea, Black Sea Province (MRGID:21465)	[SRF] surface water layer (ENVO:00010504)	2009-11-02T08:13	35759	14,2574	5,43	2009-11-03	09:26	21,44	NA	NA	NA	0,05	NA	NA	331,79	0,12	26000	0,21	https://ws.pangaea.de/dds-fdp/rest/panquery?datasetDOI=doi.pangaea.de/10.1594/PANGAEA.853810&filterParameterValue=1,TARA_A100000598	https://ws.pangaea.de/dds-fdp/rest/panquery?datasetDOI=doi.pangaea.de/10.1594/PANGAEA.858201&filterParameterValue=1,TARA_A100000598	https://ws.pangaea.de/dds-fdp/rest/panquery?datasetDOI=doi.pangaea.de/10.1594/PANGAEA.858207&filterParameterValue=1,TARA_A100000598	https://ws.pangaea.de/dds-fdp/rest/panquery?datasetDOI=doi.pangaea.de/10.1594/PANGAEA.842197&filterParameterValue=1,TARA_A100000598
TARA_A100000759	TARA_020	SEQ-(500mL-or-15min)_N180-2000	TARA_020_SRF_180-2000	Westerlies Biome	[MS] Mediterranean Sea	[MEDI] Mediterranean Sea, Black Sea Province (MRGID:21465)	[SRF] surface water layer (ENVO:00010504)	2009-11-12T17:44	34,4064	15043	5,43	2009-11-12	18:59	21,47	38,38	197,55	NA	0,05	0,01	151,65	NA	0,02	1388	0,24	https://ws.pangaea.de/dds-fdp/rest/panquery?datasetDOI=doi.pangaea.de/10.1594/PANGAEA.853810&filterParameterValue=1,TARA_A100000759	https://ws.pangaea.de/dds-fdp/rest/panquery?datasetDOI=doi.pangaea.de/10.1594/PANGAEA.858201&filterParameterValue=1,TARA_A100000759	https://ws.pangaea.de/dds-fdp/rest/panquery?datasetDOI=doi.pangaea.de/10.1594/PANGAEA.858207&filterParameterValue=1,TARA_A100000759	https://ws.pangaea.de/dds-fdp/rest/panquery?datasetDOI=doi.pangaea.de/10.1594/PANGAEA.842197&filterParameterValue=1,TARA_A100000759
TARA_A100000761	TARA_020	SEQ-(500mL-or-15min)_W5-20	TARA_020_SRF_5-20	Westerlies Biome	[MS] Mediterranean Sea	[MEDI] Mediterranean Sea, Black Sea Province (MRGID:21465)	[SRF] surface water layer (ENVO:00010504)	2009-11-12T14:09	34453	14,9538	5,43	2009-11-12	15:24	21,47	38,38	197,55	NA	0,05	0,01	151,65	NA	0,02	1388	0,24	https://ws.pangaea.de/dds-fdp/rest/panquery?datasetDOI=doi.pangaea.de/10.1594/PANGAEA.853810&filterParameterValue=1,TARA_A100000761	https://ws.pangaea.de/dds-fdp/rest/panquery?datasetDOI=doi.pangaea.de/10.1594/PANGAEA.858201&filterParameterValue=1,TARA_A100000761	https://ws.pangaea.de/dds-fdp/rest/panquery?datasetDOI=doi.pangaea.de/10.1594/PANGAEA.858207&filterParameterValue=1,TARA_A100000761	https://ws.pangaea.de/dds-fdp/rest/panquery?datasetDOI=doi.pangaea.de/10.1594/PANGAEA.842197&filterParameterValue=1,TARA_A100000761
TARA_A100000698	TARA_022	SEQ-(100L-or-15min)_W0.8-5	TARA_022_DCM_0.8-5	Westerlies Biome	[MS] Mediterranean Sea	[MEDI] Mediterranean Sea, Black Sea Province (MRGID:21465)	[DCM] deep chlorophyll maximum layer (ENVO:01000326)	2009-11-16T14:53	39,5705	17,4101	59,64	2009-11-16	16:17	15,98	38,27	220,96	NA	0,18	0,01	50,51	NA	0,00	1358	0,05	https://ws.pangaea.de/dds-fdp/rest/panquery?datasetDOI=doi.pangaea.de/10.1594/PANGAEA.853810&filterParameterValue=1,TARA_A100000698	https://ws.pangaea.de/dds-fdp/rest/panquery?datasetDOI=doi.pangaea.de/10.1594/PANGAEA.858201&filterParameterValue=1,TARA_A100000698	https://ws.pangaea.de/dds-fdp/rest/panquery?datasetDOI=doi.pangaea.de/10.1594/PANGAEA.858207&filterParameterValue=1,TARA_A100000698	https://ws.pangaea.de/dds-fdp/rest/panquery?datasetDOI=doi.pangaea.de/10.1594/PANGAEA.842197&filterParameterValue=1,TARA_A100000698
TARA_A100000700	TARA_022	SEQ-(500mL-or-15min)_N180-2000	TARA_022_DCM_180-2000	Westerlies Biome	[MS] Mediterranean Sea	[MEDI] Mediterranean Sea, Black Sea Province (MRGID:21465)	[DCM] deep chlorophyll maximum layer (ENVO:01000326)	2009-11-16T09:37	39,8607	17,4105	59,64	2009-11-17	11:01	15,98	38,27	220,96	NA	0,18	0,01	50,51	NA	0,00	1358	0,05	https://ws.pangaea.de/dds-fdp/rest/panquery?datasetDOI=doi.pangaea.de/10.1594/PANGAEA.853810&filterParameterValue=1,TARA_A100000700	https://ws.pangaea.de/dds-fdp/rest/panquery?datasetDOI=doi.pangaea.de/10.1594/PANGAEA.858201&filterParameterValue=1,TARA_A100000700	https://ws.pangaea.de/dds-fdp/rest/panquery?datasetDOI=doi.pangaea.de/10.1594/PANGAEA.858207&filterParameterValue=1,TARA_A100000700	https://ws.pangaea.de/dds-fdp/rest/panquery?datasetDOI=doi.pangaea.de/10.1594/PANGAEA.842197&filterParameterValue=1,TARA_A100000700
TARA_A100000695	TARA_022	SEQ-(500mL-or-15min)_N20-180	TARA_022_DCM_20-180	Westerlies Biome	[MS] Mediterranean Sea	[MEDI] Mediterranean Sea, Black Sea Province (MRGID:21465)	[DCM] deep chlorophyll maximum layer (ENVO:01000326)	2009-11-16T17:03	39,8661	17,3868	59,64	2009-11-16	18:27	15,98	38,27	220,96	NA	0,18	0,01	50,51	NA	0,00	1358	0,05	https://ws.pangaea.de/dds-fdp/rest/panquery?datasetDOI=doi.pangaea.de/10.1594/PANGAEA.853810&filterParameterValue=1,TARA_A100000695	https://ws.pangaea.de/dds-fdp/rest/panquery?datasetDOI=doi.pangaea.de/10.1594/PANGAEA.858201&filterParameterValue=1,TARA_A100000695	https://ws.pangaea.de/dds-fdp/rest/panquery?datasetDOI=doi.pangaea.de/10.1594/PANGAEA.858207&filterParameterValue=1,TARA_A100000695	https://ws.pangaea.de/dds-fdp/rest/panquery?datasetDOI=doi.pangaea.de/10.1594/PANGAEA.842197&filterParameterValue=1,TARA_A100000695
TARA_A100000696	TARA_022	SEQ-(500mL-or-15min)_W5-20	TARA_022_DCM_5-20	Westerlies Biome	[MS] Mediterranean Sea	[MEDI] Mediterranean Sea, Black Sea Province (MRGID:21465)	[DCM] deep chlorophyll maximum layer (ENVO:01000326)	2009-11-16T14:53	39,5705	17,4101	59,64	2009-11-16	16:17	15,98	38,27	220,96	NA	0,18	0,01	50,51	NA	0,00	1358	0,05	https://ws.pangaea.de/dds-fdp/rest/panquery?datasetDOI=doi.pangaea.de/10.1594/PANGAEA.853810&filterParameterValue=1,TARA_A100000696	https://ws.pangaea.de/dds-fdp/rest/panquery?datasetDOI=doi.pangaea.de/10.1594/PANGAEA.858201&filterParameterValue=1,TARA_A100000696	https://ws.pangaea.de/dds-fdp/rest/panquery?datasetDOI=doi.pangaea.de/10.1594/PANGAEA.858207&filterParameterValue=1,TARA_A100000696	https://ws.pangaea.de/dds-fdp/rest/panquery?datasetDOI=doi.pangaea.de/10.1594/PANGAEA.842197&filterParameterValue=1,TARA_A100000696
TARA_A100000534	TARA_022	SEQ-(100L-or-15min)_W0.8-5	TARA_022_SRF_0.8-5	Westerlies Biome	[MS] Mediterranean Sea	[MEDI] Mediterranean Sea, Black Sea Province (MRGID:21465)	[SRF] surface water layer (ENVO:00010504)	2009-11-16T08:16	39,8386	17,4155	5,44	2009-11-17	09:40	17,33	37,86	221,52	NA	0,23	0,02	50,51	668,37	0,21	1388	0,05	https://ws.pangaea.de/dds-fdp/rest/panquery?datasetDOI=doi.pangaea.de/10.1594/PANGAEA.853810&filterParameterValue=1,TARA_A100000534	https://ws.pangaea.de/dds-fdp/rest/panquery?datasetDOI=doi.pangaea.de/10.1594/PANGAEA.858201&filterParameterValue=1,TARA_A100000534	https://ws.pangaea.de/dds-fdp/rest/panquery?datasetDOI=doi.pangaea.de/10.1594/PANGAEA.858207&filterParameterValue=1,TARA_A100000534	https://ws.pangaea.de/dds-fdp/rest/panquery?datasetDOI=doi.pangaea.de/10.1594/PANGAEA.842197&filterParameterValue=1,TARA_A100000534
TARA_A100000536	TARA_022	SEQ-(500mL-or-15min)_N180-2000	TARA_022_SRF_180-2000	Westerlies Biome	[MS] Mediterranean Sea	[MEDI] Mediterranean Sea, Black Sea Province (MRGID:21465)	[SRF] surface water layer (ENVO:00010504)	2009-11-16T19:53	39,8312	17,3952	5,44	2009-11-16	21:17	17,33	37,86	221,52	NA	0,23	0,02	50,51	668,37	0,21	1388	0,05	https://ws.pangaea.de/dds-fdp/rest/panquery?datasetDOI=doi.pangaea.de/10.1594/PANGAEA.853810&filterParameterValue=1,TARA_A100000536	https://ws.pangaea.de/dds-fdp/rest/panquery?datasetDOI=doi.pangaea.de/10.1594/PANGAEA.858201&filterParameterValue=1,TARA_A100000536	https://ws.pangaea.de/dds-fdp/rest/panquery?datasetDOI=doi.pangaea.de/10.1594/PANGAEA.858207&filterParameterValue=1,TARA_A100000536	https://ws.pangaea.de/dds-fdp/rest/panquery?datasetDOI=doi.pangaea.de/10.1594/PANGAEA.842197&filterParameterValue=1,TARA_A100000536
TARA_A100000538	TARA_022	SEQ-(500mL-or-15min)_N20-180	TARA_022_SRF_20-180	Westerlies Biome	[MS] Mediterranean Sea	[MEDI] Mediterranean Sea, Black Sea Province (MRGID:21465)	[SRF] surface water layer (ENVO:00010504)	2009-11-16T13:40	39814	17,4138	5,44	2009-11-16	15:04	17,33	37,86	221,52	NA	0,23	0,02	50,51	668,37	0,21	1388	0,05	https://ws.pangaea.de/dds-fdp/rest/panquery?datasetDOI=doi.pangaea.de/10.1594/PANGAEA.853810&filterParameterValue=1,TARA_A100000538	https://ws.pangaea.de/dds-fdp/rest/panquery?datasetDOI=doi.pangaea.de/10.1594/PANGAEA.858201&filterParameterValue=1,TARA_A100000538	https://ws.pangaea.de/dds-fdp/rest/panquery?datasetDOI=doi.pangaea.de/10.1594/PANGAEA.858207&filterParameterValue=1,TARA_A100000538	https://ws.pangaea.de/dds-fdp/rest/panquery?datasetDOI=doi.pangaea.de/10.1594/PANGAEA.842197&filterParameterValue=1,TARA_A100000538
TARA_A100000539	TARA_022	SEQ-(500mL-or-15min)_W5-20	TARA_022_SRF_5-20	Westerlies Biome	[MS] Mediterranean Sea	[MEDI] Mediterranean Sea, Black Sea Province (MRGID:21465)	[SRF] surface water layer (ENVO:00010504)	2009-11-16T08:16	39,8386	17,4155	5,44	2009-11-17	09:40	17,33	37,86	221,52	NA	0,23	0,02	50,51	668,37	0,21	1388	0,05	https://ws.pangaea.de/dds-fdp/rest/panquery?datasetDOI=doi.pangaea.de/10.1594/PANGAEA.853810&filterParameterValue=1,TARA_A100000539	https://ws.pangaea.de/dds-fdp/rest/panquery?datasetDOI=doi.pangaea.de/10.1594/PANGAEA.858201&filterParameterValue=1,TARA_A100000539	https://ws.pangaea.de/dds-fdp/rest/panquery?datasetDOI=doi.pangaea.de/10.1594/PANGAEA.858207&filterParameterValue=1,TARA_A100000539	https://ws.pangaea.de/dds-fdp/rest/panquery?datasetDOI=doi.pangaea.de/10.1594/PANGAEA.842197&filterParameterValue=1,TARA_A100000539
TARA_A100000555	TARA_023	SEQ-(100L-or-15min)_W0.8-5	TARA_023_DCM_0.8-5	Westerlies Biome	[MS] Mediterranean Sea	[MEDI] Mediterranean Sea, Black Sea Province (MRGID:21465)	[DCM] deep chlorophyll maximum layer (ENVO:01000326)	2009-11-18T13:50	42,1735	17,7252	49,70	2009-11-18	15:15	14,96	38,52	225,60	NA	0,23	0,01	57,51	478,14	0,05	1386	0,09	https://ws.pangaea.de/dds-fdp/rest/panquery?datasetDOI=doi.pangaea.de/10.1594/PANGAEA.853810&filterParameterValue=1,TARA_A100000555	https://ws.pangaea.de/dds-fdp/rest/panquery?datasetDOI=doi.pangaea.de/10.1594/PANGAEA.858201&filterParameterValue=1,TARA_A100000555	https://ws.pangaea.de/dds-fdp/rest/panquery?datasetDOI=doi.pangaea.de/10.1594/PANGAEA.858207&filterParameterValue=1,TARA_A100000555	https://ws.pangaea.de/dds-fdp/rest/panquery?datasetDOI=doi.pangaea.de/10.1594/PANGAEA.842197&filterParameterValue=1,TARA_A100000555
TARA_A100000559	TARA_023	SEQ-(100L-or-15min)_W0.8-5	TARA_023_DCM_0.8-5	Westerlies Biome	[MS] Mediterranean Sea	[MEDI] Mediterranean Sea, Black Sea Province (MRGID:21465)	[DCM] deep chlorophyll maximum layer (ENVO:01000326)	2009-11-18T13:50	42,1735	17,7252	49,70	2009-11-18	15:15	14,96	38,52	225,60	NA	0,23	0,01	57,51	478,14	0,05	1386	0,09	https://ws.pangaea.de/dds-fdp/rest/panquery?datasetDOI=doi.pangaea.de/10.1594/PANGAEA.853810&filterParameterValue=1,TARA_A100000559	https://ws.pangaea.de/dds-fdp/rest/panquery?datasetDOI=doi.pangaea.de/10.1594/PANGAEA.858201&filterParameterValue=1,TARA_A100000559	https://ws.pangaea.de/dds-fdp/rest/panquery?datasetDOI=doi.pangaea.de/10.1594/PANGAEA.858207&filterParameterValue=1,TARA_A100000559	https://ws.pangaea.de/dds-fdp/rest/panquery?datasetDOI=doi.pangaea.de/10.1594/PANGAEA.842197&filterParameterValue=1,TARA_A100000559
TARA_A100000554	TARA_023	SEQ-(500mL-or-15min)_N180-2000	TARA_023_DCM_180-2000	Westerlies Biome	[MS] Mediterranean Sea	[MEDI] Mediterranean Sea, Black Sea Province (MRGID:21465)	[DCM] deep chlorophyll maximum layer (ENVO:01000326)	2009-11-18T16:32	42,1646	17736	49,70	2009-11-18	17:57	14,96	38,52	225,60	NA	0,23	0,01	57,51	478,14	0,05	1386	0,09	https://ws.pangaea.de/dds-fdp/rest/panquery?datasetDOI=doi.pangaea.de/10.1594/PANGAEA.853810&filterParameterValue=1,TARA_A100000554	https://ws.pangaea.de/dds-fdp/rest/panquery?datasetDOI=doi.pangaea.de/10.1594/PANGAEA.858201&filterParameterValue=1,TARA_A100000554	https://ws.pangaea.de/dds-fdp/rest/panquery?datasetDOI=doi.pangaea.de/10.1594/PANGAEA.858207&filterParameterValue=1,TARA_A100000554	https://ws.pangaea.de/dds-fdp/rest/panquery?datasetDOI=doi.pangaea.de/10.1594/PANGAEA.842197&filterParameterValue=1,TARA_A100000554
TARA_A100000557	TARA_023	SEQ-(500mL-or-15min)_N180-2000	TARA_023_DCM_180-2000	Westerlies Biome	[MS] Mediterranean Sea	[MEDI] Mediterranean Sea, Black Sea Province (MRGID:21465)	[DCM] deep chlorophyll maximum layer (ENVO:01000326)	2009-11-18T16:32	42,1646	17736	49,70	2009-11-18	17:57	14,96	38,52	225,60	NA	0,23	0,01	57,51	478,14	0,05	1386	0,09	https://ws.pangaea.de/dds-fdp/rest/panquery?datasetDOI=doi.pangaea.de/10.1594/PANGAEA.853810&filterParameterValue=1,TARA_A100000557	https://ws.pangaea.de/dds-fdp/rest/panquery?datasetDOI=doi.pangaea.de/10.1594/PANGAEA.858201&filterParameterValue=1,TARA_A100000557	https://ws.pangaea.de/dds-fdp/rest/panquery?datasetDOI=doi.pangaea.de/10.1594/PANGAEA.858207&filterParameterValue=1,TARA_A100000557	https://ws.pangaea.de/dds-fdp/rest/panquery?datasetDOI=doi.pangaea.de/10.1594/PANGAEA.842197&filterParameterValue=1,TARA_A100000557
TARA_A100000561	TARA_023	SEQ-(500mL-or-15min)_N20-180	TARA_023_DCM_20-180	Westerlies Biome	[MS] Mediterranean Sea	[MEDI] Mediterranean Sea, Black Sea Province (MRGID:21465)	[DCM] deep chlorophyll maximum layer (ENVO:01000326)	2009-11-18T13:52	42,1694	17,7179	49,70	2009-11-18	15:17	14,96	38,52	225,60	NA	0,23	0,01	57,51	478,14	0,05	1386	0,09	https://ws.pangaea.de/dds-fdp/rest/panquery?datasetDOI=doi.pangaea.de/10.1594/PANGAEA.853810&filterParameterValue=1,TARA_A100000561	https://ws.pangaea.de/dds-fdp/rest/panquery?datasetDOI=doi.pangaea.de/10.1594/PANGAEA.858201&filterParameterValue=1,TARA_A100000561	https://ws.pangaea.de/dds-fdp/rest/panquery?datasetDOI=doi.pangaea.de/10.1594/PANGAEA.858207&filterParameterValue=1,TARA_A100000561	https://ws.pangaea.de/dds-fdp/rest/panquery?datasetDOI=doi.pangaea.de/10.1594/PANGAEA.842197&filterParameterValue=1,TARA_A100000561
TARA_A100000551	TARA_023	SEQ-(100L-or-15min)_W0.8-5	TARA_023_SRF_0.8-5	Westerlies Biome	[MS] Mediterranean Sea	[MEDI] Mediterranean Sea, Black Sea Province (MRGID:21465)	[SRF] surface water layer (ENVO:00010504)	2009-11-18T08:41	42,2038	17715	5,47	2009-11-19	10:06	17,64	38,19	220,00	NA	0,17	0,01	57,51	478,14	0,04	1388	0,09	https://ws.pangaea.de/dds-fdp/rest/panquery?datasetDOI=doi.pangaea.de/10.1594/PANGAEA.853810&filterParameterValue=1,TARA_A100000551	https://ws.pangaea.de/dds-fdp/rest/panquery?datasetDOI=doi.pangaea.de/10.1594/PANGAEA.858201&filterParameterValue=1,TARA_A100000551	https://ws.pangaea.de/dds-fdp/rest/panquery?datasetDOI=doi.pangaea.de/10.1594/PANGAEA.858207&filterParameterValue=1,TARA_A100000551	https://ws.pangaea.de/dds-fdp/rest/panquery?datasetDOI=doi.pangaea.de/10.1594/PANGAEA.842197&filterParameterValue=1,TARA_A100000551
TARA_A100000552	TARA_023	SEQ-(100L-or-15min)_W0.8-5	TARA_023_SRF_0.8-5	Westerlies Biome	[MS] Mediterranean Sea	[MEDI] Mediterranean Sea, Black Sea Province (MRGID:21465)	[SRF] surface water layer (ENVO:00010504)	2009-11-18T08:41	42,2038	17715	5,47	2009-11-19	10:06	17,64	38,19	220,00	NA	0,17	0,01	57,51	478,14	0,04	1388	0,09	https://ws.pangaea.de/dds-fdp/rest/panquery?datasetDOI=doi.pangaea.de/10.1594/PANGAEA.853810&filterParameterValue=1,TARA_A100000552	https://ws.pangaea.de/dds-fdp/rest/panquery?datasetDOI=doi.pangaea.de/10.1594/PANGAEA.858201&filterParameterValue=1,TARA_A100000552	https://ws.pangaea.de/dds-fdp/rest/panquery?datasetDOI=doi.pangaea.de/10.1594/PANGAEA.858207&filterParameterValue=1,TARA_A100000552	https://ws.pangaea.de/dds-fdp/rest/panquery?datasetDOI=doi.pangaea.de/10.1594/PANGAEA.842197&filterParameterValue=1,TARA_A100000552
TARA_A100000546	TARA_023	SEQ-(500mL-or-15min)_N180-2000	TARA_023_SRF_180-2000	Westerlies Biome	[MS] Mediterranean Sea	[MEDI] Mediterranean Sea, Black Sea Province (MRGID:21465)	[SRF] surface water layer (ENVO:00010504)	2009-11-18T10:17	42,1916	17,7175	5,47	2009-11-19	11:42	17,64	38,19	220,00	NA	0,17	0,01	57,51	478,14	0,04	1388	0,09	https://ws.pangaea.de/dds-fdp/rest/panquery?datasetDOI=doi.pangaea.de/10.1594/PANGAEA.853810&filterParameterValue=1,TARA_A100000546	https://ws.pangaea.de/dds-fdp/rest/panquery?datasetDOI=doi.pangaea.de/10.1594/PANGAEA.858201&filterParameterValue=1,TARA_A100000546	https://ws.pangaea.de/dds-fdp/rest/panquery?datasetDOI=doi.pangaea.de/10.1594/PANGAEA.858207&filterParameterValue=1,TARA_A100000546	https://ws.pangaea.de/dds-fdp/rest/panquery?datasetDOI=doi.pangaea.de/10.1594/PANGAEA.842197&filterParameterValue=1,TARA_A100000546
TARA_A100000549	TARA_023	SEQ-(500mL-or-15min)_N180-2000	TARA_023_SRF_180-2000	Westerlies Biome	[MS] Mediterranean Sea	[MEDI] Mediterranean Sea, Black Sea Province (MRGID:21465)	[SRF] surface water layer (ENVO:00010504)	2009-11-18T10:17	42,1916	17,7175	5,47	2009-11-19	11:42	17,64	38,19	220,00	NA	0,17	0,01	57,51	478,14	0,04	1388	0,09	https://ws.pangaea.de/dds-fdp/rest/panquery?datasetDOI=doi.pangaea.de/10.1594/PANGAEA.853810&filterParameterValue=1,TARA_A100000549	https://ws.pangaea.de/dds-fdp/rest/panquery?datasetDOI=doi.pangaea.de/10.1594/PANGAEA.858201&filterParameterValue=1,TARA_A100000549	https://ws.pangaea.de/dds-fdp/rest/panquery?datasetDOI=doi.pangaea.de/10.1594/PANGAEA.858207&filterParameterValue=1,TARA_A100000549	https://ws.pangaea.de/dds-fdp/rest/panquery?datasetDOI=doi.pangaea.de/10.1594/PANGAEA.842197&filterParameterValue=1,TARA_A100000549
TARA_A100000548	TARA_023	SEQ-(500mL-or-15min)_N20-180	TARA_023_SRF_20-180	Westerlies Biome	[MS] Mediterranean Sea	[MEDI] Mediterranean Sea, Black Sea Province (MRGID:21465)	[SRF] surface water layer (ENVO:00010504)	2009-11-18T12:56	42,1735	17,7175	5,47	2009-11-18	14:21	17,64	38,19	220,00	NA	0,17	0,01	57,51	478,14	0,04	1388	0,09	https://ws.pangaea.de/dds-fdp/rest/panquery?datasetDOI=doi.pangaea.de/10.1594/PANGAEA.853810&filterParameterValue=1,TARA_A100000548	https://ws.pangaea.de/dds-fdp/rest/panquery?datasetDOI=doi.pangaea.de/10.1594/PANGAEA.858201&filterParameterValue=1,TARA_A100000548	https://ws.pangaea.de/dds-fdp/rest/panquery?datasetDOI=doi.pangaea.de/10.1594/PANGAEA.858207&filterParameterValue=1,TARA_A100000548	https://ws.pangaea.de/dds-fdp/rest/panquery?datasetDOI=doi.pangaea.de/10.1594/PANGAEA.842197&filterParameterValue=1,TARA_A100000548
TARA_A100000550	TARA_023	SEQ-(500mL-or-15min)_N20-180	TARA_023_SRF_20-180	Westerlies Biome	[MS] Mediterranean Sea	[MEDI] Mediterranean Sea, Black Sea Province (MRGID:21465)	[SRF] surface water layer (ENVO:00010504)	2009-11-18T12:56	42,1735	17,7175	5,47	2009-11-18	14:21	17,64	38,19	220,00	NA	0,17	0,01	57,51	478,14	0,04	1388	0,09	https://ws.pangaea.de/dds-fdp/rest/panquery?datasetDOI=doi.pangaea.de/10.1594/PANGAEA.853810&filterParameterValue=1,TARA_A100000550	https://ws.pangaea.de/dds-fdp/rest/panquery?datasetDOI=doi.pangaea.de/10.1594/PANGAEA.858201&filterParameterValue=1,TARA_A100000550	https://ws.pangaea.de/dds-fdp/rest/panquery?datasetDOI=doi.pangaea.de/10.1594/PANGAEA.858207&filterParameterValue=1,TARA_A100000550	https://ws.pangaea.de/dds-fdp/rest/panquery?datasetDOI=doi.pangaea.de/10.1594/PANGAEA.842197&filterParameterValue=1,TARA_A100000550
TARA_A100000396	TARA_025	SEQ-(100L-or-15min)_W0.8-5	TARA_025_DCM_0.8-5	Westerlies Biome	[MS] Mediterranean Sea	[MEDI] Mediterranean Sea, Black Sea Province (MRGID:21465)	[DCM] deep chlorophyll maximum layer (ENVO:01000326)	2009-11-23T13:52	39,3991	19,3997	51,19	2009-11-23	15:23	15,02	38,50	227,39	NA	0,17	0,07	39,02	481,04	0,15	1386	0,05	https://ws.pangaea.de/dds-fdp/rest/panquery?datasetDOI=doi.pangaea.de/10.1594/PANGAEA.853810&filterParameterValue=1,TARA_A100000396	https://ws.pangaea.de/dds-fdp/rest/panquery?datasetDOI=doi.pangaea.de/10.1594/PANGAEA.858201&filterParameterValue=1,TARA_A100000396	https://ws.pangaea.de/dds-fdp/rest/panquery?datasetDOI=doi.pangaea.de/10.1594/PANGAEA.858207&filterParameterValue=1,TARA_A100000396	https://ws.pangaea.de/dds-fdp/rest/panquery?datasetDOI=doi.pangaea.de/10.1594/PANGAEA.842197&filterParameterValue=1,TARA_A100000396
TARA_E500000200	TARA_025	SEQ-(500mL-or-15min)_N180-2000	TARA_025_DCM_180-2000	Westerlies Biome	[MS] Mediterranean Sea	[MEDI] Mediterranean Sea, Black Sea Province (MRGID:21465)	[DCM] deep chlorophyll maximum layer (ENVO:01000326)	2009-11-23T16:20	39,3833	19,4183	51,19	2009-11-23	17:51	15,02	38,50	227,39	NA	0,17	0,07	39,02	481,04	0,15	1386	0,05	https://ws.pangaea.de/dds-fdp/rest/panquery?datasetDOI=doi.pangaea.de/10.1594/PANGAEA.853810&filterParameterValue=1,TARA_E500000200	https://ws.pangaea.de/dds-fdp/rest/panquery?datasetDOI=doi.pangaea.de/10.1594/PANGAEA.858201&filterParameterValue=1,TARA_E500000200	https://ws.pangaea.de/dds-fdp/rest/panquery?datasetDOI=doi.pangaea.de/10.1594/PANGAEA.858207&filterParameterValue=1,TARA_E500000200	https://ws.pangaea.de/dds-fdp/rest/panquery?datasetDOI=doi.pangaea.de/10.1594/PANGAEA.842197&filterParameterValue=1,TARA_E500000200
TARA_E500000196	TARA_025	SEQ-(500mL-or-15min)_N20-180	TARA_025_DCM_20-180	Westerlies Biome	[MS] Mediterranean Sea	[MEDI] Mediterranean Sea, Black Sea Province (MRGID:21465)	[DCM] deep chlorophyll maximum layer (ENVO:01000326)	2009-11-23T13:08	39,4046	19,3886	51,19	2009-11-23	14:39	15,02	38,50	227,39	NA	0,17	0,07	39,02	481,04	0,15	1386	0,05	https://ws.pangaea.de/dds-fdp/rest/panquery?datasetDOI=doi.pangaea.de/10.1594/PANGAEA.853810&filterParameterValue=1,TARA_E500000196	https://ws.pangaea.de/dds-fdp/rest/panquery?datasetDOI=doi.pangaea.de/10.1594/PANGAEA.858201&filterParameterValue=1,TARA_E500000196	https://ws.pangaea.de/dds-fdp/rest/panquery?datasetDOI=doi.pangaea.de/10.1594/PANGAEA.858207&filterParameterValue=1,TARA_E500000196	https://ws.pangaea.de/dds-fdp/rest/panquery?datasetDOI=doi.pangaea.de/10.1594/PANGAEA.842197&filterParameterValue=1,TARA_E500000196
TARA_A100000398	TARA_025	SEQ-(500mL-or-15min)_W5-20	TARA_025_DCM_5-20	Westerlies Biome	[MS] Mediterranean Sea	[MEDI] Mediterranean Sea, Black Sea Province (MRGID:21465)	[DCM] deep chlorophyll maximum layer (ENVO:01000326)	2009-11-23T13:52	39,3991	19,3997	51,19	2009-11-23	15:23	15,02	38,50	227,39	NA	0,17	0,07	39,02	481,04	0,15	1386	0,05	https://ws.pangaea.de/dds-fdp/rest/panquery?datasetDOI=doi.pangaea.de/10.1594/PANGAEA.853810&filterParameterValue=1,TARA_A100000398	https://ws.pangaea.de/dds-fdp/rest/panquery?datasetDOI=doi.pangaea.de/10.1594/PANGAEA.858201&filterParameterValue=1,TARA_A100000398	https://ws.pangaea.de/dds-fdp/rest/panquery?datasetDOI=doi.pangaea.de/10.1594/PANGAEA.858207&filterParameterValue=1,TARA_A100000398	https://ws.pangaea.de/dds-fdp/rest/panquery?datasetDOI=doi.pangaea.de/10.1594/PANGAEA.842197&filterParameterValue=1,TARA_A100000398
TARA_A100000393	TARA_025	SEQ-(100L-or-15min)_W0.8-5	TARA_025_SRF_0.8-5	Westerlies Biome	[MS] Mediterranean Sea	[MEDI] Mediterranean Sea, Black Sea Province (MRGID:21465)	[SRF] surface water layer (ENVO:00010504)	2009-11-23T09:12	39,3888	19,3905	5,44	2009-11-24	10:43	18,42	38,20	217,50	NA	0,13	0,01	39,02	481,04	0,03	1388	0,06	https://ws.pangaea.de/dds-fdp/rest/panquery?datasetDOI=doi.pangaea.de/10.1594/PANGAEA.853810&filterParameterValue=1,TARA_A100000393	https://ws.pangaea.de/dds-fdp/rest/panquery?datasetDOI=doi.pangaea.de/10.1594/PANGAEA.858201&filterParameterValue=1,TARA_A100000393	https://ws.pangaea.de/dds-fdp/rest/panquery?datasetDOI=doi.pangaea.de/10.1594/PANGAEA.858207&filterParameterValue=1,TARA_A100000393	https://ws.pangaea.de/dds-fdp/rest/panquery?datasetDOI=doi.pangaea.de/10.1594/PANGAEA.842197&filterParameterValue=1,TARA_A100000393
TARA_A100000402	TARA_025	SEQ-(500mL-or-15min)_N180-2000	TARA_025_SRF_180-2000	Westerlies Biome	[MS] Mediterranean Sea	[MEDI] Mediterranean Sea, Black Sea Province (MRGID:21465)	[SRF] surface water layer (ENVO:00010504)	2009-11-23T11:02	39,2143	19406	5,44	2009-11-23	12:33	18,42	38,20	217,50	NA	0,13	0,01	39,02	481,04	0,03	1388	0,06	https://ws.pangaea.de/dds-fdp/rest/panquery?datasetDOI=doi.pangaea.de/10.1594/PANGAEA.853810&filterParameterValue=1,TARA_A100000402	https://ws.pangaea.de/dds-fdp/rest/panquery?datasetDOI=doi.pangaea.de/10.1594/PANGAEA.858201&filterParameterValue=1,TARA_A100000402	https://ws.pangaea.de/dds-fdp/rest/panquery?datasetDOI=doi.pangaea.de/10.1594/PANGAEA.858207&filterParameterValue=1,TARA_A100000402	https://ws.pangaea.de/dds-fdp/rest/panquery?datasetDOI=doi.pangaea.de/10.1594/PANGAEA.842197&filterParameterValue=1,TARA_A100000402
TARA_A100000400	TARA_025	SEQ-(500mL-or-15min)_N20-180	TARA_025_SRF_20-180	Westerlies Biome	[MS] Mediterranean Sea	[MEDI] Mediterranean Sea, Black Sea Province (MRGID:21465)	[SRF] surface water layer (ENVO:00010504)	2009-11-23T09:14	39,3885	19,3906	5,44	2009-11-24	10:45	18,42	38,20	217,50	NA	0,13	0,01	39,02	481,04	0,03	1388	0,06	https://ws.pangaea.de/dds-fdp/rest/panquery?datasetDOI=doi.pangaea.de/10.1594/PANGAEA.853810&filterParameterValue=1,TARA_A100000400	https://ws.pangaea.de/dds-fdp/rest/panquery?datasetDOI=doi.pangaea.de/10.1594/PANGAEA.858201&filterParameterValue=1,TARA_A100000400	https://ws.pangaea.de/dds-fdp/rest/panquery?datasetDOI=doi.pangaea.de/10.1594/PANGAEA.858207&filterParameterValue=1,TARA_A100000400	https://ws.pangaea.de/dds-fdp/rest/panquery?datasetDOI=doi.pangaea.de/10.1594/PANGAEA.842197&filterParameterValue=1,TARA_A100000400
TARA_A100000394	TARA_025	SEQ-(500mL-or-15min)_W5-20	TARA_025_SRF_5-20	Westerlies Biome	[MS] Mediterranean Sea	[MEDI] Mediterranean Sea, Black Sea Province (MRGID:21465)	[SRF] surface water layer (ENVO:00010504)	2009-11-23T09:12	39,3888	19,3905	5,44	2009-11-24	10:43	18,42	38,20	217,50	NA	0,13	0,01	39,02	481,04	0,03	1388	0,06	https://ws.pangaea.de/dds-fdp/rest/panquery?datasetDOI=doi.pangaea.de/10.1594/PANGAEA.853810&filterParameterValue=1,TARA_A100000394	https://ws.pangaea.de/dds-fdp/rest/panquery?datasetDOI=doi.pangaea.de/10.1594/PANGAEA.858201&filterParameterValue=1,TARA_A100000394	https://ws.pangaea.de/dds-fdp/rest/panquery?datasetDOI=doi.pangaea.de/10.1594/PANGAEA.858207&filterParameterValue=1,TARA_A100000394	https://ws.pangaea.de/dds-fdp/rest/panquery?datasetDOI=doi.pangaea.de/10.1594/PANGAEA.842197&filterParameterValue=1,TARA_A100000394
TARA_E400007200	TARA_026	SEQ-(100L-or-15min)_W0.8-20	TARA_026_SRF_0.8-20	Westerlies Biome	[MS] Mediterranean Sea	[MEDI] Mediterranean Sea, Black Sea Province (MRGID:21465)	[SRF] surface water layer (ENVO:00010504)	2009-11-24T07:40	38,4761	20,1705	5,44	2009-11-25	09:13	19,04	38,36	214,65	NA	0,11	0,01	21,78	NA	0,01	1388	0,06	https://ws.pangaea.de/dds-fdp/rest/panquery?datasetDOI=doi.pangaea.de/10.1594/PANGAEA.853810&filterParameterValue=1,TARA_E400007200	https://ws.pangaea.de/dds-fdp/rest/panquery?datasetDOI=doi.pangaea.de/10.1594/PANGAEA.858201&filterParameterValue=1,TARA_E400007200	https://ws.pangaea.de/dds-fdp/rest/panquery?datasetDOI=doi.pangaea.de/10.1594/PANGAEA.858207&filterParameterValue=1,TARA_E400007200	https://ws.pangaea.de/dds-fdp/rest/panquery?datasetDOI=doi.pangaea.de/10.1594/PANGAEA.842197&filterParameterValue=1,TARA_E400007200
TARA_S400007202	TARA_026	SEQ-(500mL-or-15min)_N20-180	TARA_026_SRF_20-180	Westerlies Biome	[MS] Mediterranean Sea	[MEDI] Mediterranean Sea, Black Sea Province (MRGID:21465)	[SRF] surface water layer (ENVO:00010504)	2009-11-24T07:44	38,4735	20,1718	5,44	2009-11-25	09:17	19,04	38,36	214,65	NA	0,11	0,01	21,78	NA	0,01	1388	0,06	https://ws.pangaea.de/dds-fdp/rest/panquery?datasetDOI=doi.pangaea.de/10.1594/PANGAEA.853810&filterParameterValue=1,TARA_S400007202	https://ws.pangaea.de/dds-fdp/rest/panquery?datasetDOI=doi.pangaea.de/10.1594/PANGAEA.858201&filterParameterValue=1,TARA_S400007202	https://ws.pangaea.de/dds-fdp/rest/panquery?datasetDOI=doi.pangaea.de/10.1594/PANGAEA.858207&filterParameterValue=1,TARA_S400007202	https://ws.pangaea.de/dds-fdp/rest/panquery?datasetDOI=doi.pangaea.de/10.1594/PANGAEA.842197&filterParameterValue=1,TARA_S400007202
TARA_A100001644	TARA_030	SEQ-(500mL-or-15min)_N20-180	TARA_030_DCM_20-180	Westerlies Biome	[MS] Mediterranean Sea	[MEDI] Mediterranean Sea, Black Sea Province (MRGID:21465)	[DCM] deep chlorophyll maximum layer (ENVO:01000326)	2009-12-15T13:05	33,9189	32,8532	69,58	2009-12-15	15:21	17,89	39,21	219,20	-0,89	0,16	0,00	73,96	269,66	0,02	1381	0,02	https://ws.pangaea.de/dds-fdp/rest/panquery?datasetDOI=doi.pangaea.de/10.1594/PANGAEA.853810&filterParameterValue=1,TARA_A100001644	https://ws.pangaea.de/dds-fdp/rest/panquery?datasetDOI=doi.pangaea.de/10.1594/PANGAEA.858201&filterParameterValue=1,TARA_A100001644	https://ws.pangaea.de/dds-fdp/rest/panquery?datasetDOI=doi.pangaea.de/10.1594/PANGAEA.858207&filterParameterValue=1,TARA_A100001644	https://ws.pangaea.de/dds-fdp/rest/panquery?datasetDOI=doi.pangaea.de/10.1594/PANGAEA.842197&filterParameterValue=1,TARA_A100001644
TARA_A100001645	TARA_030	SEQ-(500mL-or-15min)_N20-180	TARA_030_DCM_20-180	Westerlies Biome	[MS] Mediterranean Sea	[MEDI] Mediterranean Sea, Black Sea Province (MRGID:21465)	[DCM] deep chlorophyll maximum layer (ENVO:01000326)	2009-12-15T13:05	33,9189	32,8532	69,58	2009-12-15	15:21	17,89	39,21	219,20	-0,89	0,16	0,00	73,96	269,66	0,02	1381	0,02	https://ws.pangaea.de/dds-fdp/rest/panquery?datasetDOI=doi.pangaea.de/10.1594/PANGAEA.853810&filterParameterValue=1,TARA_A100001645	https://ws.pangaea.de/dds-fdp/rest/panquery?datasetDOI=doi.pangaea.de/10.1594/PANGAEA.858201&filterParameterValue=1,TARA_A100001645	https://ws.pangaea.de/dds-fdp/rest/panquery?datasetDOI=doi.pangaea.de/10.1594/PANGAEA.858207&filterParameterValue=1,TARA_A100001645	https://ws.pangaea.de/dds-fdp/rest/panquery?datasetDOI=doi.pangaea.de/10.1594/PANGAEA.842197&filterParameterValue=1,TARA_A100001645
TARA_A100001648	TARA_030	SEQ-(500mL-or-15min)_N180-2000	TARA_030_SRF_180-2000	Westerlies Biome	[MS] Mediterranean Sea	[MEDI] Mediterranean Sea, Black Sea Province (MRGID:21465)	[SRF] surface water layer (ENVO:00010504)	2009-12-15T12:44	33,9184	32,86	5,44	2009-12-15	15:00	20,47	39,43	207,91	-0,15	0,09	0,00	73,96	255,27	0,05	1388	0,02	https://ws.pangaea.de/dds-fdp/rest/panquery?datasetDOI=doi.pangaea.de/10.1594/PANGAEA.853810&filterParameterValue=1,TARA_A100001648	https://ws.pangaea.de/dds-fdp/rest/panquery?datasetDOI=doi.pangaea.de/10.1594/PANGAEA.858201&filterParameterValue=1,TARA_A100001648	https://ws.pangaea.de/dds-fdp/rest/panquery?datasetDOI=doi.pangaea.de/10.1594/PANGAEA.858207&filterParameterValue=1,TARA_A100001648	https://ws.pangaea.de/dds-fdp/rest/panquery?datasetDOI=doi.pangaea.de/10.1594/PANGAEA.842197&filterParameterValue=1,TARA_A100001648
TARA_A100001649	TARA_030	SEQ-(500mL-or-15min)_N180-2000	TARA_030_SRF_180-2000	Westerlies Biome	[MS] Mediterranean Sea	[MEDI] Mediterranean Sea, Black Sea Province (MRGID:21465)	[SRF] surface water layer (ENVO:00010504)	2009-12-15T12:44	33,9184	32,86	5,44	2009-12-15	15:00	20,47	39,43	207,91	-0,15	0,09	0,00	73,96	255,27	0,05	1388	0,02	https://ws.pangaea.de/dds-fdp/rest/panquery?datasetDOI=doi.pangaea.de/10.1594/PANGAEA.853810&filterParameterValue=1,TARA_A100001649	https://ws.pangaea.de/dds-fdp/rest/panquery?datasetDOI=doi.pangaea.de/10.1594/PANGAEA.858201&filterParameterValue=1,TARA_A100001649	https://ws.pangaea.de/dds-fdp/rest/panquery?datasetDOI=doi.pangaea.de/10.1594/PANGAEA.858207&filterParameterValue=1,TARA_A100001649	https://ws.pangaea.de/dds-fdp/rest/panquery?datasetDOI=doi.pangaea.de/10.1594/PANGAEA.842197&filterParameterValue=1,TARA_A100001649
TARA_A100001646	TARA_030	SEQ-(500mL-or-15min)_N20-180	TARA_030_SRF_20-180	Westerlies Biome	[MS] Mediterranean Sea	[MEDI] Mediterranean Sea, Black Sea Province (MRGID:21465)	[SRF] surface water layer (ENVO:00010504)	2009-12-15T11:13	33,9178	32,8849	5,44	2009-12-15	13:29	20,47	39,43	207,91	-0,15	0,09	0,00	73,96	255,27	0,05	1388	0,02	https://ws.pangaea.de/dds-fdp/rest/panquery?datasetDOI=doi.pangaea.de/10.1594/PANGAEA.853810&filterParameterValue=1,TARA_A100001646	https://ws.pangaea.de/dds-fdp/rest/panquery?datasetDOI=doi.pangaea.de/10.1594/PANGAEA.858201&filterParameterValue=1,TARA_A100001646	https://ws.pangaea.de/dds-fdp/rest/panquery?datasetDOI=doi.pangaea.de/10.1594/PANGAEA.858207&filterParameterValue=1,TARA_A100001646	https://ws.pangaea.de/dds-fdp/rest/panquery?datasetDOI=doi.pangaea.de/10.1594/PANGAEA.842197&filterParameterValue=1,TARA_A100001646
TARA_A100001647	TARA_030	SEQ-(500mL-or-15min)_N20-180	TARA_030_SRF_20-180	Westerlies Biome	[MS] Mediterranean Sea	[MEDI] Mediterranean Sea, Black Sea Province (MRGID:21465)	[SRF] surface water layer (ENVO:00010504)	2009-12-15T11:13	33,9178	32,8849	5,44	2009-12-15	13:29	20,47	39,43	207,91	-0,15	0,09	0,00	73,96	255,27	0,05	1388	0,02	https://ws.pangaea.de/dds-fdp/rest/panquery?datasetDOI=doi.pangaea.de/10.1594/PANGAEA.853810&filterParameterValue=1,TARA_A100001647	https://ws.pangaea.de/dds-fdp/rest/panquery?datasetDOI=doi.pangaea.de/10.1594/PANGAEA.858201&filterParameterValue=1,TARA_A100001647	https://ws.pangaea.de/dds-fdp/rest/panquery?datasetDOI=doi.pangaea.de/10.1594/PANGAEA.858207&filterParameterValue=1,TARA_A100001647	https://ws.pangaea.de/dds-fdp/rest/panquery?datasetDOI=doi.pangaea.de/10.1594/PANGAEA.842197&filterParameterValue=1,TARA_A100001647
TARA_A100001638	TARA_030	SEQ-(500mL-or-15min)_W5-20	TARA_030_SRF_5-20	Westerlies Biome	[MS] Mediterranean Sea	[MEDI] Mediterranean Sea, Black Sea Province (MRGID:21465)	[SRF] surface water layer (ENVO:00010504)	2009-12-15T10:41	33,9179	32898	5,44	2009-12-15	12:57	20,47	39,43	207,91	-0,15	0,09	0,00	73,96	255,27	0,05	1388	0,02	https://ws.pangaea.de/dds-fdp/rest/panquery?datasetDOI=doi.pangaea.de/10.1594/PANGAEA.853810&filterParameterValue=1,TARA_A100001638	https://ws.pangaea.de/dds-fdp/rest/panquery?datasetDOI=doi.pangaea.de/10.1594/PANGAEA.858201&filterParameterValue=1,TARA_A100001638	https://ws.pangaea.de/dds-fdp/rest/panquery?datasetDOI=doi.pangaea.de/10.1594/PANGAEA.858207&filterParameterValue=1,TARA_A100001638	https://ws.pangaea.de/dds-fdp/rest/panquery?datasetDOI=doi.pangaea.de/10.1594/PANGAEA.842197&filterParameterValue=1,TARA_A100001638
TARA_A100001641	TARA_030	SEQ-(500mL-or-15min)_W5-20	TARA_030_SRF_5-20	Westerlies Biome	[MS] Mediterranean Sea	[MEDI] Mediterranean Sea, Black Sea Province (MRGID:21465)	[SRF] surface water layer (ENVO:00010504)	2009-12-15T10:41	33,9179	32898	5,44	2009-12-15	12:57	20,47	39,43	207,91	-0,15	0,09	0,00	73,96	255,27	0,05	1388	0,02	https://ws.pangaea.de/dds-fdp/rest/panquery?datasetDOI=doi.pangaea.de/10.1594/PANGAEA.853810&filterParameterValue=1,TARA_A100001641	https://ws.pangaea.de/dds-fdp/rest/panquery?datasetDOI=doi.pangaea.de/10.1594/PANGAEA.858201&filterParameterValue=1,TARA_A100001641	https://ws.pangaea.de/dds-fdp/rest/panquery?datasetDOI=doi.pangaea.de/10.1594/PANGAEA.858207&filterParameterValue=1,TARA_A100001641	https://ws.pangaea.de/dds-fdp/rest/panquery?datasetDOI=doi.pangaea.de/10.1594/PANGAEA.842197&filterParameterValue=1,TARA_A100001641
TARA_N000000317	TARA_036	SEQ-(100L-or-15min)_W0.8-5	TARA_036_DCM_0.8-5	Coastal Biome	[IO] Indian Ocean	[ARAB] Northwest Arabian Sea Upwelling Province (MRGID:21475)	[DCM] deep chlorophyll maximum layer (ENVO:01000326)	2010-03-12T12:23	20,8222	63,5133	19,88	2010-03-12	16:27	25,27	36,55	208,65	0,39	0,49	0,51	416,28	1428,93	2,08	1386	0,26	https://ws.pangaea.de/dds-fdp/rest/panquery?datasetDOI=doi.pangaea.de/10.1594/PANGAEA.853810&filterParameterValue=1,TARA_N000000317	https://ws.pangaea.de/dds-fdp/rest/panquery?datasetDOI=doi.pangaea.de/10.1594/PANGAEA.858201&filterParameterValue=1,TARA_N000000317	https://ws.pangaea.de/dds-fdp/rest/panquery?datasetDOI=doi.pangaea.de/10.1594/PANGAEA.858207&filterParameterValue=1,TARA_N000000317	https://ws.pangaea.de/dds-fdp/rest/panquery?datasetDOI=doi.pangaea.de/10.1594/PANGAEA.842197&filterParameterValue=1,TARA_N000000317
TARA_N000000314	TARA_036	SEQ-(500mL-or-15min)_N180-2000	TARA_036_DCM_180-2000	Coastal Biome	[IO] Indian Ocean	[ARAB] Northwest Arabian Sea Upwelling Province (MRGID:21475)	[DCM] deep chlorophyll maximum layer (ENVO:01000326)	2010-03-12T11:20	20807	63513	19,88	2010-03-12	15:24	25,27	36,55	208,65	0,39	0,49	0,51	416,28	1428,93	2,08	1386	0,26	https://ws.pangaea.de/dds-fdp/rest/panquery?datasetDOI=doi.pangaea.de/10.1594/PANGAEA.853810&filterParameterValue=1,TARA_N000000314	https://ws.pangaea.de/dds-fdp/rest/panquery?datasetDOI=doi.pangaea.de/10.1594/PANGAEA.858201&filterParameterValue=1,TARA_N000000314	https://ws.pangaea.de/dds-fdp/rest/panquery?datasetDOI=doi.pangaea.de/10.1594/PANGAEA.858207&filterParameterValue=1,TARA_N000000314	https://ws.pangaea.de/dds-fdp/rest/panquery?datasetDOI=doi.pangaea.de/10.1594/PANGAEA.842197&filterParameterValue=1,TARA_N000000314
TARA_N000000312	TARA_036	SEQ-(500mL-or-15min)_N20-180	TARA_036_DCM_20-180	Coastal Biome	[IO] Indian Ocean	[ARAB] Northwest Arabian Sea Upwelling Province (MRGID:21475)	[DCM] deep chlorophyll maximum layer (ENVO:01000326)	2010-03-12T11:05	20,8116	63,5128	19,88	2010-03-12	15:09	25,27	36,55	208,65	0,39	0,49	0,51	416,28	1428,93	2,08	1386	0,26	https://ws.pangaea.de/dds-fdp/rest/panquery?datasetDOI=doi.pangaea.de/10.1594/PANGAEA.853810&filterParameterValue=1,TARA_N000000312	https://ws.pangaea.de/dds-fdp/rest/panquery?datasetDOI=doi.pangaea.de/10.1594/PANGAEA.858201&filterParameterValue=1,TARA_N000000312	https://ws.pangaea.de/dds-fdp/rest/panquery?datasetDOI=doi.pangaea.de/10.1594/PANGAEA.858207&filterParameterValue=1,TARA_N000000312	https://ws.pangaea.de/dds-fdp/rest/panquery?datasetDOI=doi.pangaea.de/10.1594/PANGAEA.842197&filterParameterValue=1,TARA_N000000312
TARA_N000000319	TARA_036	SEQ-(500mL-or-15min)_W5-20	TARA_036_DCM_5-20	Coastal Biome	[IO] Indian Ocean	[ARAB] Northwest Arabian Sea Upwelling Province (MRGID:21475)	[DCM] deep chlorophyll maximum layer (ENVO:01000326)	2010-03-12T12:23	20,8222	63,5133	19,88	2010-03-12	16:27	25,27	36,55	208,65	0,39	0,49	0,51	416,28	1428,93	2,08	1386	0,26	https://ws.pangaea.de/dds-fdp/rest/panquery?datasetDOI=doi.pangaea.de/10.1594/PANGAEA.853810&filterParameterValue=1,TARA_N000000319	https://ws.pangaea.de/dds-fdp/rest/panquery?datasetDOI=doi.pangaea.de/10.1594/PANGAEA.858201&filterParameterValue=1,TARA_N000000319	https://ws.pangaea.de/dds-fdp/rest/panquery?datasetDOI=doi.pangaea.de/10.1594/PANGAEA.858207&filterParameterValue=1,TARA_N000000319	https://ws.pangaea.de/dds-fdp/rest/panquery?datasetDOI=doi.pangaea.de/10.1594/PANGAEA.842197&filterParameterValue=1,TARA_N000000319
TARA_N000000316	TARA_036	SEQ-(100L-or-15min)_W0.8-5	TARA_036_SRF_0.8-5	Coastal Biome	[IO] Indian Ocean	[ARAB] Northwest Arabian Sea Upwelling Province (MRGID:21475)	[SRF] surface water layer (ENVO:00010504)	2010-03-12T06:06	20,8183	63,5047	5,44	2010-03-13	10:10	25,85	36,53	211,57	0,34	0,16	0,37	416,28	1428,93	0,13	1388	0,17	https://ws.pangaea.de/dds-fdp/rest/panquery?datasetDOI=doi.pangaea.de/10.1594/PANGAEA.853810&filterParameterValue=1,TARA_N000000316	https://ws.pangaea.de/dds-fdp/rest/panquery?datasetDOI=doi.pangaea.de/10.1594/PANGAEA.858201&filterParameterValue=1,TARA_N000000316	https://ws.pangaea.de/dds-fdp/rest/panquery?datasetDOI=doi.pangaea.de/10.1594/PANGAEA.858207&filterParameterValue=1,TARA_N000000316	https://ws.pangaea.de/dds-fdp/rest/panquery?datasetDOI=doi.pangaea.de/10.1594/PANGAEA.842197&filterParameterValue=1,TARA_N000000316
TARA_N000000313	TARA_036	SEQ-(500mL-or-15min)_N180-2000	TARA_036_SRF_180-2000	Coastal Biome	[IO] Indian Ocean	[ARAB] Northwest Arabian Sea Upwelling Province (MRGID:21475)	[SRF] surface water layer (ENVO:00010504)	2010-03-12T10:24	20,8215	63512	5,44	2010-03-12	14:28	25,85	36,53	211,57	0,34	0,16	0,37	416,28	1428,93	0,13	1388	0,17	https://ws.pangaea.de/dds-fdp/rest/panquery?datasetDOI=doi.pangaea.de/10.1594/PANGAEA.853810&filterParameterValue=1,TARA_N000000313	https://ws.pangaea.de/dds-fdp/rest/panquery?datasetDOI=doi.pangaea.de/10.1594/PANGAEA.858201&filterParameterValue=1,TARA_N000000313	https://ws.pangaea.de/dds-fdp/rest/panquery?datasetDOI=doi.pangaea.de/10.1594/PANGAEA.858207&filterParameterValue=1,TARA_N000000313	https://ws.pangaea.de/dds-fdp/rest/panquery?datasetDOI=doi.pangaea.de/10.1594/PANGAEA.842197&filterParameterValue=1,TARA_N000000313
TARA_N000000311	TARA_036	SEQ-(500mL-or-15min)_N20-180	TARA_036_SRF_20-180	Coastal Biome	[IO] Indian Ocean	[ARAB] Northwest Arabian Sea Upwelling Province (MRGID:21475)	[SRF] surface water layer (ENVO:00010504)	2010-03-12T06:06	20,8183	63,5047	5,44	2010-03-13	10:10	25,85	36,53	211,57	0,34	0,16	0,37	416,28	1428,93	0,13	1388	0,17	https://ws.pangaea.de/dds-fdp/rest/panquery?datasetDOI=doi.pangaea.de/10.1594/PANGAEA.853810&filterParameterValue=1,TARA_N000000311	https://ws.pangaea.de/dds-fdp/rest/panquery?datasetDOI=doi.pangaea.de/10.1594/PANGAEA.858201&filterParameterValue=1,TARA_N000000311	https://ws.pangaea.de/dds-fdp/rest/panquery?datasetDOI=doi.pangaea.de/10.1594/PANGAEA.858207&filterParameterValue=1,TARA_N000000311	https://ws.pangaea.de/dds-fdp/rest/panquery?datasetDOI=doi.pangaea.de/10.1594/PANGAEA.842197&filterParameterValue=1,TARA_N000000311
TARA_N000000030	TARA_038	SEQ-(100L-or-15min)_W0.8-5	TARA_038_DCM_0.8-5	Trades Biome	[IO] Indian Ocean	[MONS] Indian Monsoon Gyres Province (MRGID:21471)	[DCM] deep chlorophyll maximum layer (ENVO:01000326)	2010-03-15T11:18	19,0284	64,5126	28,81	2010-03-15	15:27	25,98	NA	159,88	1,06	0,61	0,42	581,15	882,66	1,86	1385	0,22	https://ws.pangaea.de/dds-fdp/rest/panquery?datasetDOI=doi.pangaea.de/10.1594/PANGAEA.853810&filterParameterValue=1,TARA_N000000030	https://ws.pangaea.de/dds-fdp/rest/panquery?datasetDOI=doi.pangaea.de/10.1594/PANGAEA.858201&filterParameterValue=1,TARA_N000000030	https://ws.pangaea.de/dds-fdp/rest/panquery?datasetDOI=doi.pangaea.de/10.1594/PANGAEA.858207&filterParameterValue=1,TARA_N000000030	https://ws.pangaea.de/dds-fdp/rest/panquery?datasetDOI=doi.pangaea.de/10.1594/PANGAEA.842197&filterParameterValue=1,TARA_N000000030
TARA_N000000047	TARA_038	SEQ-(100L-or-15min)_W0.8-5	TARA_038_DCM_0.8-5	Trades Biome	[IO] Indian Ocean	[MONS] Indian Monsoon Gyres Province (MRGID:21471)	[DCM] deep chlorophyll maximum layer (ENVO:01000326)	2010-03-15T11:18	19,0284	64,5126	28,81	2010-03-15	15:27	25,98	NA	159,88	1,06	0,61	0,42	581,15	882,66	1,86	1385	0,22	https://ws.pangaea.de/dds-fdp/rest/panquery?datasetDOI=doi.pangaea.de/10.1594/PANGAEA.853810&filterParameterValue=1,TARA_N000000047	https://ws.pangaea.de/dds-fdp/rest/panquery?datasetDOI=doi.pangaea.de/10.1594/PANGAEA.858201&filterParameterValue=1,TARA_N000000047	https://ws.pangaea.de/dds-fdp/rest/panquery?datasetDOI=doi.pangaea.de/10.1594/PANGAEA.858207&filterParameterValue=1,TARA_N000000047	https://ws.pangaea.de/dds-fdp/rest/panquery?datasetDOI=doi.pangaea.de/10.1594/PANGAEA.842197&filterParameterValue=1,TARA_N000000047
TARA_N000000041	TARA_038	SEQ-(500mL-or-15min)_N20-180	TARA_038_DCM_20-180	Trades Biome	[IO] Indian Ocean	[MONS] Indian Monsoon Gyres Province (MRGID:21471)	[DCM] deep chlorophyll maximum layer (ENVO:01000326)	2010-03-15T10:02	19,0235	64,5256	28,81	2010-03-15	14:11	25,98	NA	159,88	1,06	0,61	0,42	581,15	882,66	1,86	1385	0,22	https://ws.pangaea.de/dds-fdp/rest/panquery?datasetDOI=doi.pangaea.de/10.1594/PANGAEA.853810&filterParameterValue=1,TARA_N000000041	https://ws.pangaea.de/dds-fdp/rest/panquery?datasetDOI=doi.pangaea.de/10.1594/PANGAEA.858201&filterParameterValue=1,TARA_N000000041	https://ws.pangaea.de/dds-fdp/rest/panquery?datasetDOI=doi.pangaea.de/10.1594/PANGAEA.858207&filterParameterValue=1,TARA_N000000041	https://ws.pangaea.de/dds-fdp/rest/panquery?datasetDOI=doi.pangaea.de/10.1594/PANGAEA.842197&filterParameterValue=1,TARA_N000000041
TARA_N000000029	TARA_038	SEQ-(100L-or-15min)_W0.8-5	TARA_038_SRF_0.8-5	Trades Biome	[IO] Indian Ocean	[MONS] Indian Monsoon Gyres Province (MRGID:21471)	[SRF] surface water layer (ENVO:00010504)	2010-03-15T03:35	19,0393	64,4913	5,41	2010-03-16	07:43	26,35	36,62	201,21	-0,14	0,13	0,32	581,15	917,20	0,06	1388	0,18	https://ws.pangaea.de/dds-fdp/rest/panquery?datasetDOI=doi.pangaea.de/10.1594/PANGAEA.853810&filterParameterValue=1,TARA_N000000029	https://ws.pangaea.de/dds-fdp/rest/panquery?datasetDOI=doi.pangaea.de/10.1594/PANGAEA.858201&filterParameterValue=1,TARA_N000000029	https://ws.pangaea.de/dds-fdp/rest/panquery?datasetDOI=doi.pangaea.de/10.1594/PANGAEA.858207&filterParameterValue=1,TARA_N000000029	https://ws.pangaea.de/dds-fdp/rest/panquery?datasetDOI=doi.pangaea.de/10.1594/PANGAEA.842197&filterParameterValue=1,TARA_N000000029
TARA_N000000039	TARA_038	SEQ-(500mL-or-15min)_N180-2000	TARA_038_SRF_180-2000	Trades Biome	[IO] Indian Ocean	[MONS] Indian Monsoon Gyres Province (MRGID:21471)	[SRF] surface water layer (ENVO:00010504)	2010-03-15T05:31	19,0359	64511	5,41	2010-03-16	09:40	26,35	36,62	201,21	-0,14	0,13	0,32	581,15	917,20	0,06	1388	0,18	https://ws.pangaea.de/dds-fdp/rest/panquery?datasetDOI=doi.pangaea.de/10.1594/PANGAEA.853810&filterParameterValue=1,TARA_N000000039	https://ws.pangaea.de/dds-fdp/rest/panquery?datasetDOI=doi.pangaea.de/10.1594/PANGAEA.858201&filterParameterValue=1,TARA_N000000039	https://ws.pangaea.de/dds-fdp/rest/panquery?datasetDOI=doi.pangaea.de/10.1594/PANGAEA.858207&filterParameterValue=1,TARA_N000000039	https://ws.pangaea.de/dds-fdp/rest/panquery?datasetDOI=doi.pangaea.de/10.1594/PANGAEA.842197&filterParameterValue=1,TARA_N000000039
TARA_N000000046	TARA_038	SEQ-(500mL-or-15min)_N180-2000	TARA_038_SRF_180-2000	Trades Biome	[IO] Indian Ocean	[MONS] Indian Monsoon Gyres Province (MRGID:21471)	[SRF] surface water layer (ENVO:00010504)	2010-03-15T05:31	19,0359	64511	5,41	2010-03-16	09:40	26,35	36,62	201,21	-0,14	0,13	0,32	581,15	917,20	0,06	1388	0,18	https://ws.pangaea.de/dds-fdp/rest/panquery?datasetDOI=doi.pangaea.de/10.1594/PANGAEA.853810&filterParameterValue=1,TARA_N000000046	https://ws.pangaea.de/dds-fdp/rest/panquery?datasetDOI=doi.pangaea.de/10.1594/PANGAEA.858201&filterParameterValue=1,TARA_N000000046	https://ws.pangaea.de/dds-fdp/rest/panquery?datasetDOI=doi.pangaea.de/10.1594/PANGAEA.858207&filterParameterValue=1,TARA_N000000046	https://ws.pangaea.de/dds-fdp/rest/panquery?datasetDOI=doi.pangaea.de/10.1594/PANGAEA.842197&filterParameterValue=1,TARA_N000000046
TARA_N000000038	TARA_038	SEQ-(500mL-or-15min)_N20-180	TARA_038_SRF_20-180	Trades Biome	[IO] Indian Ocean	[MONS] Indian Monsoon Gyres Province (MRGID:21471)	[SRF] surface water layer (ENVO:00010504)	2010-03-15T03:37	19,0393	64,4913	5,41	2010-03-16	07:45	26,35	36,62	201,21	-0,14	0,13	0,32	581,15	917,20	0,06	1388	0,18	https://ws.pangaea.de/dds-fdp/rest/panquery?datasetDOI=doi.pangaea.de/10.1594/PANGAEA.853810&filterParameterValue=1,TARA_N000000038	https://ws.pangaea.de/dds-fdp/rest/panquery?datasetDOI=doi.pangaea.de/10.1594/PANGAEA.858201&filterParameterValue=1,TARA_N000000038	https://ws.pangaea.de/dds-fdp/rest/panquery?datasetDOI=doi.pangaea.de/10.1594/PANGAEA.858207&filterParameterValue=1,TARA_N000000038	https://ws.pangaea.de/dds-fdp/rest/panquery?datasetDOI=doi.pangaea.de/10.1594/PANGAEA.842197&filterParameterValue=1,TARA_N000000038
TARA_N000000045	TARA_038	SEQ-(500mL-or-15min)_N20-180	TARA_038_SRF_20-180	Trades Biome	[IO] Indian Ocean	[MONS] Indian Monsoon Gyres Province (MRGID:21471)	[SRF] surface water layer (ENVO:00010504)	2010-03-15T03:37	19,0393	64,4913	5,41	2010-03-16	07:45	26,35	36,62	201,21	-0,14	0,13	0,32	581,15	917,20	0,06	1388	0,18	https://ws.pangaea.de/dds-fdp/rest/panquery?datasetDOI=doi.pangaea.de/10.1594/PANGAEA.853810&filterParameterValue=1,TARA_N000000045	https://ws.pangaea.de/dds-fdp/rest/panquery?datasetDOI=doi.pangaea.de/10.1594/PANGAEA.858201&filterParameterValue=1,TARA_N000000045	https://ws.pangaea.de/dds-fdp/rest/panquery?datasetDOI=doi.pangaea.de/10.1594/PANGAEA.858207&filterParameterValue=1,TARA_N000000045	https://ws.pangaea.de/dds-fdp/rest/panquery?datasetDOI=doi.pangaea.de/10.1594/PANGAEA.842197&filterParameterValue=1,TARA_N000000045
TARA_N000000007	TARA_039	SEQ-(100L-or-15min)_W0.8-5	TARA_039_DCM_0.8-5	Trades Biome	[IO] Indian Ocean	[MONS] Indian Monsoon Gyres Province (MRGID:21471)	[DCM] deep chlorophyll maximum layer (ENVO:01000326)	2010-03-18T11:33	18,5839	66,4727	29,80	2010-03-18	15:50	26,75	36,37	192,54	-0,74	0,24	0,26	464,96	543,11	0,09	1379	0,15	https://ws.pangaea.de/dds-fdp/rest/panquery?datasetDOI=doi.pangaea.de/10.1594/PANGAEA.853810&filterParameterValue=1,TARA_N000000007	https://ws.pangaea.de/dds-fdp/rest/panquery?datasetDOI=doi.pangaea.de/10.1594/PANGAEA.858201&filterParameterValue=1,TARA_N000000007	https://ws.pangaea.de/dds-fdp/rest/panquery?datasetDOI=doi.pangaea.de/10.1594/PANGAEA.858207&filterParameterValue=1,TARA_N000000007	https://ws.pangaea.de/dds-fdp/rest/panquery?datasetDOI=doi.pangaea.de/10.1594/PANGAEA.842197&filterParameterValue=1,TARA_N000000007
TARA_N000000014	TARA_039	SEQ-(500mL-or-15min)_N180-2000	TARA_039_DCM_180-2000	Trades Biome	[IO] Indian Ocean	[MONS] Indian Monsoon Gyres Province (MRGID:21471)	[DCM] deep chlorophyll maximum layer (ENVO:01000326)	2010-03-18T10:41	18,5584	66,4725	29,80	2010-03-18	14:58	26,75	36,37	192,54	-0,74	0,24	0,26	464,96	543,11	0,09	1379	0,15	https://ws.pangaea.de/dds-fdp/rest/panquery?datasetDOI=doi.pangaea.de/10.1594/PANGAEA.853810&filterParameterValue=1,TARA_N000000014	https://ws.pangaea.de/dds-fdp/rest/panquery?datasetDOI=doi.pangaea.de/10.1594/PANGAEA.858201&filterParameterValue=1,TARA_N000000014	https://ws.pangaea.de/dds-fdp/rest/panquery?datasetDOI=doi.pangaea.de/10.1594/PANGAEA.858207&filterParameterValue=1,TARA_N000000014	https://ws.pangaea.de/dds-fdp/rest/panquery?datasetDOI=doi.pangaea.de/10.1594/PANGAEA.842197&filterParameterValue=1,TARA_N000000014
TARA_N000000012	TARA_039	SEQ-(500mL-or-15min)_N20-180	TARA_039_DCM_20-180	Trades Biome	[IO] Indian Ocean	[MONS] Indian Monsoon Gyres Province (MRGID:21471)	[DCM] deep chlorophyll maximum layer (ENVO:01000326)	2010-03-18T09:40	18,5745	66,4895	29,80	2010-03-18	13:57	26,75	36,37	192,54	-0,74	0,24	0,26	464,96	543,11	0,09	1379	0,15	https://ws.pangaea.de/dds-fdp/rest/panquery?datasetDOI=doi.pangaea.de/10.1594/PANGAEA.853810&filterParameterValue=1,TARA_N000000012	https://ws.pangaea.de/dds-fdp/rest/panquery?datasetDOI=doi.pangaea.de/10.1594/PANGAEA.858201&filterParameterValue=1,TARA_N000000012	https://ws.pangaea.de/dds-fdp/rest/panquery?datasetDOI=doi.pangaea.de/10.1594/PANGAEA.858207&filterParameterValue=1,TARA_N000000012	https://ws.pangaea.de/dds-fdp/rest/panquery?datasetDOI=doi.pangaea.de/10.1594/PANGAEA.842197&filterParameterValue=1,TARA_N000000012
TARA_N000000006	TARA_039	SEQ-(100L-or-15min)_W0.8-5	TARA_039_SRF_0.8-5	Trades Biome	[IO] Indian Ocean	[MONS] Indian Monsoon Gyres Province (MRGID:21471)	[SRF] surface water layer (ENVO:00010504)	2010-03-18T04:27	18,5918	66622	5,47	2010-03-19	08:45	27,21	36,29	192,90	-0,31	0,09	0,23	464,96	543,11	0,03	1388	0,16	https://ws.pangaea.de/dds-fdp/rest/panquery?datasetDOI=doi.pangaea.de/10.1594/PANGAEA.853810&filterParameterValue=1,TARA_N000000006	https://ws.pangaea.de/dds-fdp/rest/panquery?datasetDOI=doi.pangaea.de/10.1594/PANGAEA.858201&filterParameterValue=1,TARA_N000000006	https://ws.pangaea.de/dds-fdp/rest/panquery?datasetDOI=doi.pangaea.de/10.1594/PANGAEA.858207&filterParameterValue=1,TARA_N000000006	https://ws.pangaea.de/dds-fdp/rest/panquery?datasetDOI=doi.pangaea.de/10.1594/PANGAEA.842197&filterParameterValue=1,TARA_N000000006
TARA_N000000013	TARA_039	SEQ-(500mL-or-15min)_N180-2000	TARA_039_SRF_180-2000	Trades Biome	[IO] Indian Ocean	[MONS] Indian Monsoon Gyres Province (MRGID:21471)	[SRF] surface water layer (ENVO:00010504)	2010-03-18T08:20	18,5743	66,5029	5,47	2010-03-18	12:37	27,21	36,29	192,90	-0,31	0,09	0,23	464,96	543,11	0,03	1388	0,16	https://ws.pangaea.de/dds-fdp/rest/panquery?datasetDOI=doi.pangaea.de/10.1594/PANGAEA.853810&filterParameterValue=1,TARA_N000000013	https://ws.pangaea.de/dds-fdp/rest/panquery?datasetDOI=doi.pangaea.de/10.1594/PANGAEA.858201&filterParameterValue=1,TARA_N000000013	https://ws.pangaea.de/dds-fdp/rest/panquery?datasetDOI=doi.pangaea.de/10.1594/PANGAEA.858207&filterParameterValue=1,TARA_N000000013	https://ws.pangaea.de/dds-fdp/rest/panquery?datasetDOI=doi.pangaea.de/10.1594/PANGAEA.842197&filterParameterValue=1,TARA_N000000013
TARA_N000000011	TARA_039	SEQ-(500mL-or-15min)_N20-180	TARA_039_SRF_20-180	Trades Biome	[IO] Indian Ocean	[MONS] Indian Monsoon Gyres Province (MRGID:21471)	[SRF] surface water layer (ENVO:00010504)	2010-03-18T05:05	18,5667	66522	5,47	2010-03-19	09:22	27,21	36,29	192,90	-0,31	0,09	0,23	464,96	543,11	0,03	1388	0,16	https://ws.pangaea.de/dds-fdp/rest/panquery?datasetDOI=doi.pangaea.de/10.1594/PANGAEA.853810&filterParameterValue=1,TARA_N000000011	https://ws.pangaea.de/dds-fdp/rest/panquery?datasetDOI=doi.pangaea.de/10.1594/PANGAEA.858201&filterParameterValue=1,TARA_N000000011	https://ws.pangaea.de/dds-fdp/rest/panquery?datasetDOI=doi.pangaea.de/10.1594/PANGAEA.858207&filterParameterValue=1,TARA_N000000011	https://ws.pangaea.de/dds-fdp/rest/panquery?datasetDOI=doi.pangaea.de/10.1594/PANGAEA.842197&filterParameterValue=1,TARA_N000000011
TARA_N000000008	TARA_039	SEQ-(500mL-or-15min)_W5-20	TARA_039_SRF_5-20	Trades Biome	[IO] Indian Ocean	[MONS] Indian Monsoon Gyres Province (MRGID:21471)	[SRF] surface water layer (ENVO:00010504)	2010-03-18T04:27	18,5918	66622	5,47	2010-03-19	08:45	27,21	36,29	192,90	-0,31	0,09	0,23	464,96	543,11	0,03	1388	0,16	https://ws.pangaea.de/dds-fdp/rest/panquery?datasetDOI=doi.pangaea.de/10.1594/PANGAEA.853810&filterParameterValue=1,TARA_N000000008	https://ws.pangaea.de/dds-fdp/rest/panquery?datasetDOI=doi.pangaea.de/10.1594/PANGAEA.858201&filterParameterValue=1,TARA_N000000008	https://ws.pangaea.de/dds-fdp/rest/panquery?datasetDOI=doi.pangaea.de/10.1594/PANGAEA.858207&filterParameterValue=1,TARA_N000000008	https://ws.pangaea.de/dds-fdp/rest/panquery?datasetDOI=doi.pangaea.de/10.1594/PANGAEA.842197&filterParameterValue=1,TARA_N000000008
TARA_N000000063	TARA_040	SEQ-(100L-or-15min)_W>3	TARA_040_SRF_3-2000	Trades Biome	[IO] Indian Ocean	[MONS] Indian Monsoon Gyres Province (MRGID:21471)	[SRF] surface water layer (ENVO:00010504)	2010-03-22T03:04:47	17,5294	67,9576	NA	2010-03-23	07:28	NA	NA	NA	NA	NA	NA	NA	NA	NA	NA	NA	https://ws.pangaea.de/dds-fdp/rest/panquery?datasetDOI=doi.pangaea.de/10.1594/PANGAEA.853810&filterParameterValue=1,TARA_N000000063	https://ws.pangaea.de/dds-fdp/rest/panquery?datasetDOI=doi.pangaea.de/10.1594/PANGAEA.858201&filterParameterValue=1,TARA_N000000063	https://ws.pangaea.de/dds-fdp/rest/panquery?datasetDOI=doi.pangaea.de/10.1594/PANGAEA.858207&filterParameterValue=1,TARA_N000000063	https://ws.pangaea.de/dds-fdp/rest/panquery?datasetDOI=doi.pangaea.de/10.1594/PANGAEA.842197&filterParameterValue=1,TARA_N000000063
TARA_N000000072	TARA_041	SEQ-(100L-or-15min)_W0.8-5	TARA_041_DCM_0.8-5	Trades Biome	[IO] Indian Ocean	[MONS] Indian Monsoon Gyres Province (MRGID:21471)	[DCM] deep chlorophyll maximum layer (ENVO:01000326)	2010-03-30T10:56	14,5536	70,0128	75,52	2010-03-30	15:31	25,13	36,22	67,53	12,57	0,33	1,35	245,43	347,42	0,49	1124	0,47	https://ws.pangaea.de/dds-fdp/rest/panquery?datasetDOI=doi.pangaea.de/10.1594/PANGAEA.853810&filterParameterValue=1,TARA_N000000072	https://ws.pangaea.de/dds-fdp/rest/panquery?datasetDOI=doi.pangaea.de/10.1594/PANGAEA.858201&filterParameterValue=1,TARA_N000000072	https://ws.pangaea.de/dds-fdp/rest/panquery?datasetDOI=doi.pangaea.de/10.1594/PANGAEA.858207&filterParameterValue=1,TARA_N000000072	https://ws.pangaea.de/dds-fdp/rest/panquery?datasetDOI=doi.pangaea.de/10.1594/PANGAEA.842197&filterParameterValue=1,TARA_N000000072
TARA_N000000075	TARA_041	SEQ-(500mL-or-15min)_N20-180	TARA_041_DCM_20-180	Trades Biome	[IO] Indian Ocean	[MONS] Indian Monsoon Gyres Province (MRGID:21471)	[DCM] deep chlorophyll maximum layer (ENVO:01000326)	2010-03-30T09:17	14,5644	70,0096	75,52	2010-03-30	13:52	25,13	36,22	67,53	12,57	0,33	1,35	245,43	347,42	0,49	1124	0,47	https://ws.pangaea.de/dds-fdp/rest/panquery?datasetDOI=doi.pangaea.de/10.1594/PANGAEA.853810&filterParameterValue=1,TARA_N000000075	https://ws.pangaea.de/dds-fdp/rest/panquery?datasetDOI=doi.pangaea.de/10.1594/PANGAEA.858201&filterParameterValue=1,TARA_N000000075	https://ws.pangaea.de/dds-fdp/rest/panquery?datasetDOI=doi.pangaea.de/10.1594/PANGAEA.858207&filterParameterValue=1,TARA_N000000075	https://ws.pangaea.de/dds-fdp/rest/panquery?datasetDOI=doi.pangaea.de/10.1594/PANGAEA.842197&filterParameterValue=1,TARA_N000000075
TARA_N000000074	TARA_041	SEQ-(500mL-or-15min)_W5-20	TARA_041_DCM_5-20	Trades Biome	[IO] Indian Ocean	[MONS] Indian Monsoon Gyres Province (MRGID:21471)	[DCM] deep chlorophyll maximum layer (ENVO:01000326)	2010-03-30T10:56	14,5536	70,0128	75,52	2010-03-30	15:31	25,13	36,22	67,53	12,57	0,33	1,35	245,43	347,42	0,49	1124	0,47	https://ws.pangaea.de/dds-fdp/rest/panquery?datasetDOI=doi.pangaea.de/10.1594/PANGAEA.853810&filterParameterValue=1,TARA_N000000074	https://ws.pangaea.de/dds-fdp/rest/panquery?datasetDOI=doi.pangaea.de/10.1594/PANGAEA.858201&filterParameterValue=1,TARA_N000000074	https://ws.pangaea.de/dds-fdp/rest/panquery?datasetDOI=doi.pangaea.de/10.1594/PANGAEA.858207&filterParameterValue=1,TARA_N000000074	https://ws.pangaea.de/dds-fdp/rest/panquery?datasetDOI=doi.pangaea.de/10.1594/PANGAEA.842197&filterParameterValue=1,TARA_N000000074
TARA_N000000071	TARA_041	SEQ-(100L-or-15min)_W0.8-5	TARA_041_SRF_0.8-5	Trades Biome	[IO] Indian Ocean	[MONS] Indian Monsoon Gyres Province (MRGID:21471)	[SRF] surface water layer (ENVO:00010504)	2010-03-30T02:47	14,6059	69,9776	5,39	2010-03-31	07:22	29,17	36,05	186,56	-0,30	0,00	0,14	245,43	347,42	0,09	1388	0,04	https://ws.pangaea.de/dds-fdp/rest/panquery?datasetDOI=doi.pangaea.de/10.1594/PANGAEA.853810&filterParameterValue=1,TARA_N000000071	https://ws.pangaea.de/dds-fdp/rest/panquery?datasetDOI=doi.pangaea.de/10.1594/PANGAEA.858201&filterParameterValue=1,TARA_N000000071	https://ws.pangaea.de/dds-fdp/rest/panquery?datasetDOI=doi.pangaea.de/10.1594/PANGAEA.858207&filterParameterValue=1,TARA_N000000071	https://ws.pangaea.de/dds-fdp/rest/panquery?datasetDOI=doi.pangaea.de/10.1594/PANGAEA.842197&filterParameterValue=1,TARA_N000000071
TARA_N000000077	TARA_041	SEQ-(500mL-or-15min)_N180-2000	TARA_041_SRF_180-2000	Trades Biome	[IO] Indian Ocean	[MONS] Indian Monsoon Gyres Province (MRGID:21471)	[SRF] surface water layer (ENVO:00010504)	2010-03-30T05:32	14,5741	69,9988	5,39	2010-03-31	10:07	29,17	36,05	186,56	-0,30	0,00	0,14	245,43	347,42	0,09	1388	0,04	https://ws.pangaea.de/dds-fdp/rest/panquery?datasetDOI=doi.pangaea.de/10.1594/PANGAEA.853810&filterParameterValue=1,TARA_N000000077	https://ws.pangaea.de/dds-fdp/rest/panquery?datasetDOI=doi.pangaea.de/10.1594/PANGAEA.858201&filterParameterValue=1,TARA_N000000077	https://ws.pangaea.de/dds-fdp/rest/panquery?datasetDOI=doi.pangaea.de/10.1594/PANGAEA.858207&filterParameterValue=1,TARA_N000000077	https://ws.pangaea.de/dds-fdp/rest/panquery?datasetDOI=doi.pangaea.de/10.1594/PANGAEA.842197&filterParameterValue=1,TARA_N000000077
TARA_N000000076	TARA_041	SEQ-(500mL-or-15min)_N20-180	TARA_041_SRF_20-180	Trades Biome	[IO] Indian Ocean	[MONS] Indian Monsoon Gyres Province (MRGID:21471)	[SRF] surface water layer (ENVO:00010504)	2010-03-30T02:45	14,6067	69,9775	5,39	2010-03-31	07:20	29,17	36,05	186,56	-0,30	0,00	0,14	245,43	347,42	0,09	1388	0,04	https://ws.pangaea.de/dds-fdp/rest/panquery?datasetDOI=doi.pangaea.de/10.1594/PANGAEA.853810&filterParameterValue=1,TARA_N000000076	https://ws.pangaea.de/dds-fdp/rest/panquery?datasetDOI=doi.pangaea.de/10.1594/PANGAEA.858201&filterParameterValue=1,TARA_N000000076	https://ws.pangaea.de/dds-fdp/rest/panquery?datasetDOI=doi.pangaea.de/10.1594/PANGAEA.858207&filterParameterValue=1,TARA_N000000076	https://ws.pangaea.de/dds-fdp/rest/panquery?datasetDOI=doi.pangaea.de/10.1594/PANGAEA.842197&filterParameterValue=1,TARA_N000000076
TARA_N000000073	TARA_041	SEQ-(500mL-or-15min)_W5-20	TARA_041_SRF_5-20	Trades Biome	[IO] Indian Ocean	[MONS] Indian Monsoon Gyres Province (MRGID:21471)	[SRF] surface water layer (ENVO:00010504)	2010-03-30T02:47	14,6059	69,9776	5,39	2010-03-31	07:22	29,17	36,05	186,56	-0,30	0,00	0,14	245,43	347,42	0,09	1388	0,04	https://ws.pangaea.de/dds-fdp/rest/panquery?datasetDOI=doi.pangaea.de/10.1594/PANGAEA.853810&filterParameterValue=1,TARA_N000000073	https://ws.pangaea.de/dds-fdp/rest/panquery?datasetDOI=doi.pangaea.de/10.1594/PANGAEA.858201&filterParameterValue=1,TARA_N000000073	https://ws.pangaea.de/dds-fdp/rest/panquery?datasetDOI=doi.pangaea.de/10.1594/PANGAEA.858207&filterParameterValue=1,TARA_N000000073	https://ws.pangaea.de/dds-fdp/rest/panquery?datasetDOI=doi.pangaea.de/10.1594/PANGAEA.842197&filterParameterValue=1,TARA_N000000073
TARA_N000000267	TARA_046	SEQ-(100L-or-15min)_W0.8-5	TARA_046_SRF_0.8-5	Trades Biome	[IO] Indian Ocean	[MONS] Indian Monsoon Gyres Province (MRGID:21471)	[SRF] surface water layer (ENVO:00010504)	2010-04-15T02:01	-0,6625	73161	5,46	2010-04-16	06:53	30,13	35,11	185,73	0,48	0,12	0,10	1,34	237,56	0,05	1280	0,02	https://ws.pangaea.de/dds-fdp/rest/panquery?datasetDOI=doi.pangaea.de/10.1594/PANGAEA.853810&filterParameterValue=1,TARA_N000000267	https://ws.pangaea.de/dds-fdp/rest/panquery?datasetDOI=doi.pangaea.de/10.1594/PANGAEA.858201&filterParameterValue=1,TARA_N000000267	https://ws.pangaea.de/dds-fdp/rest/panquery?datasetDOI=doi.pangaea.de/10.1594/PANGAEA.858207&filterParameterValue=1,TARA_N000000267	https://ws.pangaea.de/dds-fdp/rest/panquery?datasetDOI=doi.pangaea.de/10.1594/PANGAEA.842197&filterParameterValue=1,TARA_N000000267
TARA_N000000270	TARA_046	SEQ-(500mL-or-15min)_N180-2000	TARA_046_SRF_180-2000	Trades Biome	[IO] Indian Ocean	[MONS] Indian Monsoon Gyres Province (MRGID:21471)	[SRF] surface water layer (ENVO:00010504)	2010-04-15T06:04	-0,6623	73,1629	5,46	2010-04-16	10:56	30,13	35,11	185,73	0,48	0,12	0,10	1,34	237,56	0,05	1280	0,02	https://ws.pangaea.de/dds-fdp/rest/panquery?datasetDOI=doi.pangaea.de/10.1594/PANGAEA.853810&filterParameterValue=1,TARA_N000000270	https://ws.pangaea.de/dds-fdp/rest/panquery?datasetDOI=doi.pangaea.de/10.1594/PANGAEA.858201&filterParameterValue=1,TARA_N000000270	https://ws.pangaea.de/dds-fdp/rest/panquery?datasetDOI=doi.pangaea.de/10.1594/PANGAEA.858207&filterParameterValue=1,TARA_N000000270	https://ws.pangaea.de/dds-fdp/rest/panquery?datasetDOI=doi.pangaea.de/10.1594/PANGAEA.842197&filterParameterValue=1,TARA_N000000270
TARA_N000000269	TARA_046	SEQ-(500mL-or-15min)_N20-180	TARA_046_SRF_20-180	Trades Biome	[IO] Indian Ocean	[MONS] Indian Monsoon Gyres Province (MRGID:21471)	[SRF] surface water layer (ENVO:00010504)	2010-04-15T02:15	-0,6625	73,1611	5,46	2010-04-16	07:07	30,13	35,11	185,73	0,48	0,12	0,10	1,34	237,56	0,05	1280	0,02	https://ws.pangaea.de/dds-fdp/rest/panquery?datasetDOI=doi.pangaea.de/10.1594/PANGAEA.853810&filterParameterValue=1,TARA_N000000269	https://ws.pangaea.de/dds-fdp/rest/panquery?datasetDOI=doi.pangaea.de/10.1594/PANGAEA.858201&filterParameterValue=1,TARA_N000000269	https://ws.pangaea.de/dds-fdp/rest/panquery?datasetDOI=doi.pangaea.de/10.1594/PANGAEA.858207&filterParameterValue=1,TARA_N000000269	https://ws.pangaea.de/dds-fdp/rest/panquery?datasetDOI=doi.pangaea.de/10.1594/PANGAEA.842197&filterParameterValue=1,TARA_N000000269
TARA_N000000268	TARA_046	SEQ-(500mL-or-15min)_W5-20	TARA_046_SRF_5-20	Trades Biome	[IO] Indian Ocean	[MONS] Indian Monsoon Gyres Province (MRGID:21471)	[SRF] surface water layer (ENVO:00010504)	2010-04-15T02:01	-0,6625	73161	5,46	2010-04-16	06:53	30,13	35,11	185,73	0,48	0,12	0,10	1,34	237,56	0,05	1280	0,02	https://ws.pangaea.de/dds-fdp/rest/panquery?datasetDOI=doi.pangaea.de/10.1594/PANGAEA.853810&filterParameterValue=1,TARA_N000000268	https://ws.pangaea.de/dds-fdp/rest/panquery?datasetDOI=doi.pangaea.de/10.1594/PANGAEA.858201&filterParameterValue=1,TARA_N000000268	https://ws.pangaea.de/dds-fdp/rest/panquery?datasetDOI=doi.pangaea.de/10.1594/PANGAEA.858207&filterParameterValue=1,TARA_N000000268	https://ws.pangaea.de/dds-fdp/rest/panquery?datasetDOI=doi.pangaea.de/10.1594/PANGAEA.842197&filterParameterValue=1,TARA_N000000268
TARA_G000000124	TARA_047	SEQ-(100L-or-15min)_W0.8-20	TARA_047_DCM_0.8-20	Trades Biome	[IO] Indian Ocean	[MONS] Indian Monsoon Gyres Province (MRGID:21471)	[DCM] deep chlorophyll maximum layer (ENVO:01000326)	2010-04-16T04:43:34	-2,0465	72,1568	NA	2010-04-17	09:31	NA	NA	NA	NA	NA	NA	NA	NA	NA	NA	NA	https://ws.pangaea.de/dds-fdp/rest/panquery?datasetDOI=doi.pangaea.de/10.1594/PANGAEA.853810&filterParameterValue=1,TARA_G000000124	https://ws.pangaea.de/dds-fdp/rest/panquery?datasetDOI=doi.pangaea.de/10.1594/PANGAEA.858201&filterParameterValue=1,TARA_G000000124	https://ws.pangaea.de/dds-fdp/rest/panquery?datasetDOI=doi.pangaea.de/10.1594/PANGAEA.858207&filterParameterValue=1,TARA_G000000124	https://ws.pangaea.de/dds-fdp/rest/panquery?datasetDOI=doi.pangaea.de/10.1594/PANGAEA.842197&filterParameterValue=1,TARA_G000000124
TARA_N000000278	TARA_047	SEQ-(100L-or-15min)_W0.8-20	TARA_047_SRF_0.8-20	Trades Biome	[IO] Indian Ocean	[MONS] Indian Monsoon Gyres Province (MRGID:21471)	[SRF] surface water layer (ENVO:00010504)	2010-04-16T04:42	-2,0465	72,1568	5,42	2010-04-17	09:30	30,20	34,91	187,57	-1,83	0,01	0,09	187,10	NA	0,02	1314	0,03	https://ws.pangaea.de/dds-fdp/rest/panquery?datasetDOI=doi.pangaea.de/10.1594/PANGAEA.853810&filterParameterValue=1,TARA_N000000278	https://ws.pangaea.de/dds-fdp/rest/panquery?datasetDOI=doi.pangaea.de/10.1594/PANGAEA.858201&filterParameterValue=1,TARA_N000000278	https://ws.pangaea.de/dds-fdp/rest/panquery?datasetDOI=doi.pangaea.de/10.1594/PANGAEA.858207&filterParameterValue=1,TARA_N000000278	https://ws.pangaea.de/dds-fdp/rest/panquery?datasetDOI=doi.pangaea.de/10.1594/PANGAEA.842197&filterParameterValue=1,TARA_N000000278
TARA_N000000284	TARA_047	SEQ-(500mL-or-15min)_N180-2000	TARA_047_SRF_180-2000	Trades Biome	[IO] Indian Ocean	[MONS] Indian Monsoon Gyres Province (MRGID:21471)	[SRF] surface water layer (ENVO:00010504)	2010-04-16T05:04	-2,0409	72,1645	5,42	2010-04-17	09:52	30,20	34,91	187,57	-1,83	0,01	0,09	187,10	NA	0,02	1314	0,03	https://ws.pangaea.de/dds-fdp/rest/panquery?datasetDOI=doi.pangaea.de/10.1594/PANGAEA.853810&filterParameterValue=1,TARA_N000000284	https://ws.pangaea.de/dds-fdp/rest/panquery?datasetDOI=doi.pangaea.de/10.1594/PANGAEA.858201&filterParameterValue=1,TARA_N000000284	https://ws.pangaea.de/dds-fdp/rest/panquery?datasetDOI=doi.pangaea.de/10.1594/PANGAEA.858207&filterParameterValue=1,TARA_N000000284	https://ws.pangaea.de/dds-fdp/rest/panquery?datasetDOI=doi.pangaea.de/10.1594/PANGAEA.842197&filterParameterValue=1,TARA_N000000284
TARA_N000000113	TARA_048	SEQ-(100L-or-15min)_W0.8-20	TARA_048_SRF_0.8-20	Trades Biome	[IO] Indian Ocean	[ISSG] Indian South Subtropical Gyre Province (MRGID:21472)	[SRF] surface water layer (ENVO:00010504)	2010-04-19T07:56	-9,3921	66,4228	5,46	2010-04-19	12:22	29,85	34,18	187,60	-1,61	0,00	0,08	532,64	159,03	0,06	1209	0,04	https://ws.pangaea.de/dds-fdp/rest/panquery?datasetDOI=doi.pangaea.de/10.1594/PANGAEA.853810&filterParameterValue=1,TARA_N000000113	https://ws.pangaea.de/dds-fdp/rest/panquery?datasetDOI=doi.pangaea.de/10.1594/PANGAEA.858201&filterParameterValue=1,TARA_N000000113	https://ws.pangaea.de/dds-fdp/rest/panquery?datasetDOI=doi.pangaea.de/10.1594/PANGAEA.858207&filterParameterValue=1,TARA_N000000113	https://ws.pangaea.de/dds-fdp/rest/panquery?datasetDOI=doi.pangaea.de/10.1594/PANGAEA.842197&filterParameterValue=1,TARA_N000000113
TARA_N000000115	TARA_048	SEQ-(500mL-or-15min)_N180-2000	TARA_048_SRF_180-2000	Trades Biome	[IO] Indian Ocean	[ISSG] Indian South Subtropical Gyre Province (MRGID:21472)	[SRF] surface water layer (ENVO:00010504)	2010-04-19T11:47	-9,4153	66303	5,46	2010-04-19	16:13	29,85	34,18	187,60	-1,61	0,00	0,08	532,64	159,03	0,06	1209	0,04	https://ws.pangaea.de/dds-fdp/rest/panquery?datasetDOI=doi.pangaea.de/10.1594/PANGAEA.853810&filterParameterValue=1,TARA_N000000115	https://ws.pangaea.de/dds-fdp/rest/panquery?datasetDOI=doi.pangaea.de/10.1594/PANGAEA.858201&filterParameterValue=1,TARA_N000000115	https://ws.pangaea.de/dds-fdp/rest/panquery?datasetDOI=doi.pangaea.de/10.1594/PANGAEA.858207&filterParameterValue=1,TARA_N000000115	https://ws.pangaea.de/dds-fdp/rest/panquery?datasetDOI=doi.pangaea.de/10.1594/PANGAEA.842197&filterParameterValue=1,TARA_N000000115
TARA_N000000216	TARA_051	SEQ-(100L-or-15min)_W0.8-5	TARA_051_DCM_0.8-5	Trades Biome	[IO] Indian Ocean	[ISSG] Indian South Subtropical Gyre Province (MRGID:21472)	[DCM] deep chlorophyll maximum layer (ENVO:01000326)	2010-05-11T10:40	-21,4689	54,3066	99,90	2010-05-11	14:20	23,91	35,12	196,92	0,24	0,19	0,11	105,18	NA	0,00	872	0,03	https://ws.pangaea.de/dds-fdp/rest/panquery?datasetDOI=doi.pangaea.de/10.1594/PANGAEA.853810&filterParameterValue=1,TARA_N000000216	https://ws.pangaea.de/dds-fdp/rest/panquery?datasetDOI=doi.pangaea.de/10.1594/PANGAEA.858201&filterParameterValue=1,TARA_N000000216	https://ws.pangaea.de/dds-fdp/rest/panquery?datasetDOI=doi.pangaea.de/10.1594/PANGAEA.858207&filterParameterValue=1,TARA_N000000216	https://ws.pangaea.de/dds-fdp/rest/panquery?datasetDOI=doi.pangaea.de/10.1594/PANGAEA.842197&filterParameterValue=1,TARA_N000000216
TARA_N000000217	TARA_051	SEQ-(100L-or-15min)_W0.8-5	TARA_051_DCM_0.8-5	Trades Biome	[IO] Indian Ocean	[ISSG] Indian South Subtropical Gyre Province (MRGID:21472)	[DCM] deep chlorophyll maximum layer (ENVO:01000326)	2010-05-11T10:40	-21,4689	54,3066	99,90	2010-05-11	14:20	23,91	35,12	196,92	0,24	0,19	0,11	105,18	NA	0,00	872	0,03	https://ws.pangaea.de/dds-fdp/rest/panquery?datasetDOI=doi.pangaea.de/10.1594/PANGAEA.853810&filterParameterValue=1,TARA_N000000217	https://ws.pangaea.de/dds-fdp/rest/panquery?datasetDOI=doi.pangaea.de/10.1594/PANGAEA.858201&filterParameterValue=1,TARA_N000000217	https://ws.pangaea.de/dds-fdp/rest/panquery?datasetDOI=doi.pangaea.de/10.1594/PANGAEA.858207&filterParameterValue=1,TARA_N000000217	https://ws.pangaea.de/dds-fdp/rest/panquery?datasetDOI=doi.pangaea.de/10.1594/PANGAEA.842197&filterParameterValue=1,TARA_N000000217
TARA_N000000193	TARA_051	SEQ-(500mL-or-15min)_N180-2000	TARA_051_DCM_180-2000	Trades Biome	[IO] Indian Ocean	[ISSG] Indian South Subtropical Gyre Province (MRGID:21472)	[DCM] deep chlorophyll maximum layer (ENVO:01000326)	2010-05-11T09:45	-21,4836	54,3312	99,90	2010-05-11	13:25	23,91	35,12	196,92	0,24	0,19	0,11	105,18	NA	0,00	872	0,03	https://ws.pangaea.de/dds-fdp/rest/panquery?datasetDOI=doi.pangaea.de/10.1594/PANGAEA.853810&filterParameterValue=1,TARA_N000000193	https://ws.pangaea.de/dds-fdp/rest/panquery?datasetDOI=doi.pangaea.de/10.1594/PANGAEA.858201&filterParameterValue=1,TARA_N000000193	https://ws.pangaea.de/dds-fdp/rest/panquery?datasetDOI=doi.pangaea.de/10.1594/PANGAEA.858207&filterParameterValue=1,TARA_N000000193	https://ws.pangaea.de/dds-fdp/rest/panquery?datasetDOI=doi.pangaea.de/10.1594/PANGAEA.842197&filterParameterValue=1,TARA_N000000193
TARA_N000000200	TARA_051	SEQ-(500mL-or-15min)_N20-180	TARA_051_DCM_20-180	Trades Biome	[IO] Indian Ocean	[ISSG] Indian South Subtropical Gyre Province (MRGID:21472)	[DCM] deep chlorophyll maximum layer (ENVO:01000326)	2010-05-11T10:40	-21,4689	54,3066	99,90	2010-05-11	14:20	23,91	35,12	196,92	0,24	0,19	0,11	105,18	NA	0,00	872	0,03	https://ws.pangaea.de/dds-fdp/rest/panquery?datasetDOI=doi.pangaea.de/10.1594/PANGAEA.853810&filterParameterValue=1,TARA_N000000200	https://ws.pangaea.de/dds-fdp/rest/panquery?datasetDOI=doi.pangaea.de/10.1594/PANGAEA.858201&filterParameterValue=1,TARA_N000000200	https://ws.pangaea.de/dds-fdp/rest/panquery?datasetDOI=doi.pangaea.de/10.1594/PANGAEA.858207&filterParameterValue=1,TARA_N000000200	https://ws.pangaea.de/dds-fdp/rest/panquery?datasetDOI=doi.pangaea.de/10.1594/PANGAEA.842197&filterParameterValue=1,TARA_N000000200
TARA_N000000225	TARA_051	SEQ-(500mL-or-15min)_N20-180	TARA_051_DCM_20-180	Trades Biome	[IO] Indian Ocean	[ISSG] Indian South Subtropical Gyre Province (MRGID:21472)	[DCM] deep chlorophyll maximum layer (ENVO:01000326)	2010-05-11T10:40	-21,4689	54,3066	99,90	2010-05-11	14:20	23,91	35,12	196,92	0,24	0,19	0,11	105,18	NA	0,00	872	0,03	https://ws.pangaea.de/dds-fdp/rest/panquery?datasetDOI=doi.pangaea.de/10.1594/PANGAEA.853810&filterParameterValue=1,TARA_N000000225	https://ws.pangaea.de/dds-fdp/rest/panquery?datasetDOI=doi.pangaea.de/10.1594/PANGAEA.858201&filterParameterValue=1,TARA_N000000225	https://ws.pangaea.de/dds-fdp/rest/panquery?datasetDOI=doi.pangaea.de/10.1594/PANGAEA.858207&filterParameterValue=1,TARA_N000000225	https://ws.pangaea.de/dds-fdp/rest/panquery?datasetDOI=doi.pangaea.de/10.1594/PANGAEA.842197&filterParameterValue=1,TARA_N000000225
TARA_N000000214	TARA_051	SEQ-(100L-or-15min)_W0.8-5	TARA_051_SRF_0.8-5	Trades Biome	[IO] Indian Ocean	[ISSG] Indian South Subtropical Gyre Province (MRGID:21472)	[SRF] surface water layer (ENVO:00010504)	2010-05-11T03:42	-21,5043	54,3563	5,97	2010-05-12	07:23	27,26	34,90	194,69	0,24	0,04	0,09	105,18	NA	0,01	973	0,03	https://ws.pangaea.de/dds-fdp/rest/panquery?datasetDOI=doi.pangaea.de/10.1594/PANGAEA.853810&filterParameterValue=1,TARA_N000000214	https://ws.pangaea.de/dds-fdp/rest/panquery?datasetDOI=doi.pangaea.de/10.1594/PANGAEA.858201&filterParameterValue=1,TARA_N000000214	https://ws.pangaea.de/dds-fdp/rest/panquery?datasetDOI=doi.pangaea.de/10.1594/PANGAEA.858207&filterParameterValue=1,TARA_N000000214	https://ws.pangaea.de/dds-fdp/rest/panquery?datasetDOI=doi.pangaea.de/10.1594/PANGAEA.842197&filterParameterValue=1,TARA_N000000214
TARA_N000000231	TARA_051	SEQ-(100L-or-15min)_W0.8-5	TARA_051_SRF_0.8-5	Trades Biome	[IO] Indian Ocean	[ISSG] Indian South Subtropical Gyre Province (MRGID:21472)	[SRF] surface water layer (ENVO:00010504)	2010-05-11T03:42	-21,5043	54,3563	5,97	2010-05-12	07:23	27,26	34,90	194,69	0,24	0,04	0,09	105,18	NA	0,01	973	0,03	https://ws.pangaea.de/dds-fdp/rest/panquery?datasetDOI=doi.pangaea.de/10.1594/PANGAEA.853810&filterParameterValue=1,TARA_N000000231	https://ws.pangaea.de/dds-fdp/rest/panquery?datasetDOI=doi.pangaea.de/10.1594/PANGAEA.858201&filterParameterValue=1,TARA_N000000231	https://ws.pangaea.de/dds-fdp/rest/panquery?datasetDOI=doi.pangaea.de/10.1594/PANGAEA.858207&filterParameterValue=1,TARA_N000000231	https://ws.pangaea.de/dds-fdp/rest/panquery?datasetDOI=doi.pangaea.de/10.1594/PANGAEA.842197&filterParameterValue=1,TARA_N000000231
TARA_N000000189	TARA_051	SEQ-(500mL-or-15min)_N180-2000	TARA_051_SRF_180-2000	Trades Biome	[IO] Indian Ocean	[ISSG] Indian South Subtropical Gyre Province (MRGID:21472)	[SRF] surface water layer (ENVO:00010504)	2010-05-11T04:05	-21,4994	54,3486	5,97	2010-05-12	07:46	27,26	34,90	194,69	0,24	0,04	0,09	105,18	NA	0,01	973	0,03	https://ws.pangaea.de/dds-fdp/rest/panquery?datasetDOI=doi.pangaea.de/10.1594/PANGAEA.853810&filterParameterValue=1,TARA_N000000189	https://ws.pangaea.de/dds-fdp/rest/panquery?datasetDOI=doi.pangaea.de/10.1594/PANGAEA.858201&filterParameterValue=1,TARA_N000000189	https://ws.pangaea.de/dds-fdp/rest/panquery?datasetDOI=doi.pangaea.de/10.1594/PANGAEA.858207&filterParameterValue=1,TARA_N000000189	https://ws.pangaea.de/dds-fdp/rest/panquery?datasetDOI=doi.pangaea.de/10.1594/PANGAEA.842197&filterParameterValue=1,TARA_N000000189
TARA_N000000196	TARA_051	SEQ-(500mL-or-15min)_N20-180	TARA_051_SRF_20-180	Trades Biome	[IO] Indian Ocean	[ISSG] Indian South Subtropical Gyre Province (MRGID:21472)	[SRF] surface water layer (ENVO:00010504)	2010-05-11T05:55	-21,4752	54,3236	5,97	2010-05-12	09:35	27,26	34,90	194,69	0,24	0,04	0,09	105,18	NA	0,01	973	0,03	https://ws.pangaea.de/dds-fdp/rest/panquery?datasetDOI=doi.pangaea.de/10.1594/PANGAEA.853810&filterParameterValue=1,TARA_N000000196	https://ws.pangaea.de/dds-fdp/rest/panquery?datasetDOI=doi.pangaea.de/10.1594/PANGAEA.858201&filterParameterValue=1,TARA_N000000196	https://ws.pangaea.de/dds-fdp/rest/panquery?datasetDOI=doi.pangaea.de/10.1594/PANGAEA.858207&filterParameterValue=1,TARA_N000000196	https://ws.pangaea.de/dds-fdp/rest/panquery?datasetDOI=doi.pangaea.de/10.1594/PANGAEA.842197&filterParameterValue=1,TARA_N000000196
TARA_N000000202	TARA_051	SEQ-(500mL-or-15min)_W5-20	TARA_051_SRF_5-20	Trades Biome	[IO] Indian Ocean	[ISSG] Indian South Subtropical Gyre Province (MRGID:21472)	[SRF] surface water layer (ENVO:00010504)	2010-05-11T03:42	-21,5043	54,3563	5,97	2010-05-12	07:23	27,26	34,90	194,69	0,24	0,04	0,09	105,18	NA	0,01	973	0,03	https://ws.pangaea.de/dds-fdp/rest/panquery?datasetDOI=doi.pangaea.de/10.1594/PANGAEA.853810&filterParameterValue=1,TARA_N000000202	https://ws.pangaea.de/dds-fdp/rest/panquery?datasetDOI=doi.pangaea.de/10.1594/PANGAEA.858201&filterParameterValue=1,TARA_N000000202	https://ws.pangaea.de/dds-fdp/rest/panquery?datasetDOI=doi.pangaea.de/10.1594/PANGAEA.858207&filterParameterValue=1,TARA_N000000202	https://ws.pangaea.de/dds-fdp/rest/panquery?datasetDOI=doi.pangaea.de/10.1594/PANGAEA.842197&filterParameterValue=1,TARA_N000000202
TARA_N000000203	TARA_051	SEQ-(500mL-or-15min)_W5-20	TARA_051_SRF_5-20	Trades Biome	[IO] Indian Ocean	[ISSG] Indian South Subtropical Gyre Province (MRGID:21472)	[SRF] surface water layer (ENVO:00010504)	2010-05-11T03:42	-21,5043	54,3563	5,97	2010-05-12	07:23	27,26	34,90	194,69	0,24	0,04	0,09	105,18	NA	0,01	973	0,03	https://ws.pangaea.de/dds-fdp/rest/panquery?datasetDOI=doi.pangaea.de/10.1594/PANGAEA.853810&filterParameterValue=1,TARA_N000000203	https://ws.pangaea.de/dds-fdp/rest/panquery?datasetDOI=doi.pangaea.de/10.1594/PANGAEA.858201&filterParameterValue=1,TARA_N000000203	https://ws.pangaea.de/dds-fdp/rest/panquery?datasetDOI=doi.pangaea.de/10.1594/PANGAEA.858207&filterParameterValue=1,TARA_N000000203	https://ws.pangaea.de/dds-fdp/rest/panquery?datasetDOI=doi.pangaea.de/10.1594/PANGAEA.842197&filterParameterValue=1,TARA_N000000203
TARA_N000000184	TARA_051	SEQ-(500mL-or-15min)_N5-20	TARA_051_SRF_5-20	Trades Biome	[IO] Indian Ocean	[ISSG] Indian South Subtropical Gyre Province (MRGID:21472)	[SRF] surface water layer (ENVO:00010504)	2010-05-11T07:23	-21,4593	54,3041	5,97	2010-05-12	11:03	27,26	34,90	194,69	0,24	0,04	0,09	105,18	NA	0,01	973	0,03	https://ws.pangaea.de/dds-fdp/rest/panquery?datasetDOI=doi.pangaea.de/10.1594/PANGAEA.853810&filterParameterValue=1,TARA_N000000184	https://ws.pangaea.de/dds-fdp/rest/panquery?datasetDOI=doi.pangaea.de/10.1594/PANGAEA.858201&filterParameterValue=1,TARA_N000000184	https://ws.pangaea.de/dds-fdp/rest/panquery?datasetDOI=doi.pangaea.de/10.1594/PANGAEA.858207&filterParameterValue=1,TARA_N000000184	https://ws.pangaea.de/dds-fdp/rest/panquery?datasetDOI=doi.pangaea.de/10.1594/PANGAEA.842197&filterParameterValue=1,TARA_N000000184
TARA_N000000185	TARA_051	SEQ-(500mL-or-15min)_N5-20	TARA_051_SRF_5-20	Trades Biome	[IO] Indian Ocean	[ISSG] Indian South Subtropical Gyre Province (MRGID:21472)	[SRF] surface water layer (ENVO:00010504)	2010-05-11T07:23	-21,4593	54,3041	5,97	2010-05-12	11:03	27,26	34,90	194,69	0,24	0,04	0,09	105,18	NA	0,01	973	0,03	https://ws.pangaea.de/dds-fdp/rest/panquery?datasetDOI=doi.pangaea.de/10.1594/PANGAEA.853810&filterParameterValue=1,TARA_N000000185	https://ws.pangaea.de/dds-fdp/rest/panquery?datasetDOI=doi.pangaea.de/10.1594/PANGAEA.858201&filterParameterValue=1,TARA_N000000185	https://ws.pangaea.de/dds-fdp/rest/panquery?datasetDOI=doi.pangaea.de/10.1594/PANGAEA.858207&filterParameterValue=1,TARA_N000000185	https://ws.pangaea.de/dds-fdp/rest/panquery?datasetDOI=doi.pangaea.de/10.1594/PANGAEA.842197&filterParameterValue=1,TARA_N000000185
TARA_N000000600	TARA_052	SEQ-(100L-or-15min)_W0.8-5	TARA_052_DCM_0.8-5	Trades Biome	[IO] Indian Ocean	[ISSG] Indian South Subtropical Gyre Province (MRGID:21472)	[DCM] deep chlorophyll maximum layer (ENVO:01000326)	2010-05-17T11:42	-16,9534	53,9601	74,51	2010-05-17	15:21	25,00	34,90	193,51	0,24	0,39	0,18	411,27	122,80	0,47	905	0,23	https://ws.pangaea.de/dds-fdp/rest/panquery?datasetDOI=doi.pangaea.de/10.1594/PANGAEA.853810&filterParameterValue=1,TARA_N000000600	https://ws.pangaea.de/dds-fdp/rest/panquery?datasetDOI=doi.pangaea.de/10.1594/PANGAEA.858201&filterParameterValue=1,TARA_N000000600	https://ws.pangaea.de/dds-fdp/rest/panquery?datasetDOI=doi.pangaea.de/10.1594/PANGAEA.858207&filterParameterValue=1,TARA_N000000600	https://ws.pangaea.de/dds-fdp/rest/panquery?datasetDOI=doi.pangaea.de/10.1594/PANGAEA.842197&filterParameterValue=1,TARA_N000000600
TARA_N000000585	TARA_052	SEQ-(500mL-or-15min)_N180-2000	TARA_052_DCM_180-2000	Trades Biome	[IO] Indian Ocean	[ISSG] Indian South Subtropical Gyre Province (MRGID:21472)	[DCM] deep chlorophyll maximum layer (ENVO:01000326)	2010-05-17T10:05	-16,9538	54,0043	74,51	2010-05-17	13:44	25,00	34,90	193,51	0,24	0,39	0,18	411,27	122,80	0,47	905	0,23	https://ws.pangaea.de/dds-fdp/rest/panquery?datasetDOI=doi.pangaea.de/10.1594/PANGAEA.853810&filterParameterValue=1,TARA_N000000585	https://ws.pangaea.de/dds-fdp/rest/panquery?datasetDOI=doi.pangaea.de/10.1594/PANGAEA.858201&filterParameterValue=1,TARA_N000000585	https://ws.pangaea.de/dds-fdp/rest/panquery?datasetDOI=doi.pangaea.de/10.1594/PANGAEA.858207&filterParameterValue=1,TARA_N000000585	https://ws.pangaea.de/dds-fdp/rest/panquery?datasetDOI=doi.pangaea.de/10.1594/PANGAEA.842197&filterParameterValue=1,TARA_N000000585
TARA_N000000593	TARA_052	SEQ-(500mL-or-15min)_N20-180	TARA_052_DCM_20-180	Trades Biome	[IO] Indian Ocean	[ISSG] Indian South Subtropical Gyre Province (MRGID:21472)	[DCM] deep chlorophyll maximum layer (ENVO:01000326)	2010-05-17T10:50	-16953	53,9825	74,51	2010-05-17	14:29	25,00	34,90	193,51	0,24	0,39	0,18	411,27	122,80	0,47	905	0,23	https://ws.pangaea.de/dds-fdp/rest/panquery?datasetDOI=doi.pangaea.de/10.1594/PANGAEA.853810&filterParameterValue=1,TARA_N000000593	https://ws.pangaea.de/dds-fdp/rest/panquery?datasetDOI=doi.pangaea.de/10.1594/PANGAEA.858201&filterParameterValue=1,TARA_N000000593	https://ws.pangaea.de/dds-fdp/rest/panquery?datasetDOI=doi.pangaea.de/10.1594/PANGAEA.858207&filterParameterValue=1,TARA_N000000593	https://ws.pangaea.de/dds-fdp/rest/panquery?datasetDOI=doi.pangaea.de/10.1594/PANGAEA.842197&filterParameterValue=1,TARA_N000000593
TARA_N000000598	TARA_052	SEQ-(100L-or-15min)_W0.8-5	TARA_052_SRF_0.8-5	Trades Biome	[IO] Indian Ocean	[ISSG] Indian South Subtropical Gyre Province (MRGID:21472)	[SRF] surface water layer (ENVO:00010504)	2010-05-17T04:10	-16957	53,9801	5,54	2010-05-18	07:49	27,87	34,57	191,68	NA	0,18	0,12	411,27	122,80	0,00	1057	0,05	https://ws.pangaea.de/dds-fdp/rest/panquery?datasetDOI=doi.pangaea.de/10.1594/PANGAEA.853810&filterParameterValue=1,TARA_N000000598	https://ws.pangaea.de/dds-fdp/rest/panquery?datasetDOI=doi.pangaea.de/10.1594/PANGAEA.858201&filterParameterValue=1,TARA_N000000598	https://ws.pangaea.de/dds-fdp/rest/panquery?datasetDOI=doi.pangaea.de/10.1594/PANGAEA.858207&filterParameterValue=1,TARA_N000000598	https://ws.pangaea.de/dds-fdp/rest/panquery?datasetDOI=doi.pangaea.de/10.1594/PANGAEA.842197&filterParameterValue=1,TARA_N000000598
TARA_N000000581	TARA_052	SEQ-(500mL-or-15min)_N180-2000	TARA_052_SRF_180-2000	Trades Biome	[IO] Indian Ocean	[ISSG] Indian South Subtropical Gyre Province (MRGID:21472)	[SRF] surface water layer (ENVO:00010504)	2010-05-17T04:10	-16,9567	53,9809	5,54	2010-05-18	07:49	27,87	34,57	191,68	NA	0,18	0,12	411,27	122,80	0,00	1057	0,05	https://ws.pangaea.de/dds-fdp/rest/panquery?datasetDOI=doi.pangaea.de/10.1594/PANGAEA.853810&filterParameterValue=1,TARA_N000000581	https://ws.pangaea.de/dds-fdp/rest/panquery?datasetDOI=doi.pangaea.de/10.1594/PANGAEA.858201&filterParameterValue=1,TARA_N000000581	https://ws.pangaea.de/dds-fdp/rest/panquery?datasetDOI=doi.pangaea.de/10.1594/PANGAEA.858207&filterParameterValue=1,TARA_N000000581	https://ws.pangaea.de/dds-fdp/rest/panquery?datasetDOI=doi.pangaea.de/10.1594/PANGAEA.842197&filterParameterValue=1,TARA_N000000581
TARA_N000000589	TARA_052	SEQ-(500mL-or-15min)_N20-180	TARA_052_SRF_20-180	Trades Biome	[IO] Indian Ocean	[ISSG] Indian South Subtropical Gyre Province (MRGID:21472)	[SRF] surface water layer (ENVO:00010504)	2010-05-17T06:48	-16,9672	53,9337	5,54	2010-05-18	10:27	27,87	34,57	191,68	NA	0,18	0,12	411,27	122,80	0,00	1057	0,05	https://ws.pangaea.de/dds-fdp/rest/panquery?datasetDOI=doi.pangaea.de/10.1594/PANGAEA.853810&filterParameterValue=1,TARA_N000000589	https://ws.pangaea.de/dds-fdp/rest/panquery?datasetDOI=doi.pangaea.de/10.1594/PANGAEA.858201&filterParameterValue=1,TARA_N000000589	https://ws.pangaea.de/dds-fdp/rest/panquery?datasetDOI=doi.pangaea.de/10.1594/PANGAEA.858207&filterParameterValue=1,TARA_N000000589	https://ws.pangaea.de/dds-fdp/rest/panquery?datasetDOI=doi.pangaea.de/10.1594/PANGAEA.842197&filterParameterValue=1,TARA_N000000589
TARA_N000000570	TARA_052	SEQ-(500mL-or-15min)_N5-20	TARA_052_SRF_5-20	Trades Biome	[IO] Indian Ocean	[ISSG] Indian South Subtropical Gyre Province (MRGID:21472)	[SRF] surface water layer (ENVO:00010504)	2010-05-17T05:45	-16,9616	53,9541	5,54	2010-05-18	09:24	27,87	34,57	191,68	NA	0,18	0,12	411,27	122,80	0,00	1057	0,05	https://ws.pangaea.de/dds-fdp/rest/panquery?datasetDOI=doi.pangaea.de/10.1594/PANGAEA.853810&filterParameterValue=1,TARA_N000000570	https://ws.pangaea.de/dds-fdp/rest/panquery?datasetDOI=doi.pangaea.de/10.1594/PANGAEA.858201&filterParameterValue=1,TARA_N000000570	https://ws.pangaea.de/dds-fdp/rest/panquery?datasetDOI=doi.pangaea.de/10.1594/PANGAEA.858207&filterParameterValue=1,TARA_N000000570	https://ws.pangaea.de/dds-fdp/rest/panquery?datasetDOI=doi.pangaea.de/10.1594/PANGAEA.842197&filterParameterValue=1,TARA_N000000570
TARA_N000000925	TARA_064	SEQ-(500mL-or-15min)_N180-2000	TARA_064_DCM_180-2000	Coastal Biome	[IO] Indian Ocean	[EAFR] Eastern Africa Coastal Province (MRGID:21473)	[DCM] deep chlorophyll maximum layer (ENVO:01000326)	2010-07-07T10:49	-29,5015	37,9946	54,69	2010-07-07	13:16	22,23	35,34	209,16	NA	0,23	0,08	546,18	492,70	0,02	800	0,16	https://ws.pangaea.de/dds-fdp/rest/panquery?datasetDOI=doi.pangaea.de/10.1594/PANGAEA.853810&filterParameterValue=1,TARA_N000000925	https://ws.pangaea.de/dds-fdp/rest/panquery?datasetDOI=doi.pangaea.de/10.1594/PANGAEA.858201&filterParameterValue=1,TARA_N000000925	https://ws.pangaea.de/dds-fdp/rest/panquery?datasetDOI=doi.pangaea.de/10.1594/PANGAEA.858207&filterParameterValue=1,TARA_N000000925	https://ws.pangaea.de/dds-fdp/rest/panquery?datasetDOI=doi.pangaea.de/10.1594/PANGAEA.842197&filterParameterValue=1,TARA_N000000925
TARA_N000000535	TARA_064	SEQ-(500mL-or-15min)_N20-180	TARA_064_DCM_20-180	Coastal Biome	[IO] Indian Ocean	[EAFR] Eastern Africa Coastal Province (MRGID:21473)	[DCM] deep chlorophyll maximum layer (ENVO:01000326)	2010-07-07T08:15	-29,4964	37,9974	54,69	2010-07-08	10:42	22,23	35,34	209,16	NA	0,23	0,08	546,18	492,70	0,02	800	0,16	https://ws.pangaea.de/dds-fdp/rest/panquery?datasetDOI=doi.pangaea.de/10.1594/PANGAEA.853810&filterParameterValue=1,TARA_N000000535	https://ws.pangaea.de/dds-fdp/rest/panquery?datasetDOI=doi.pangaea.de/10.1594/PANGAEA.858201&filterParameterValue=1,TARA_N000000535	https://ws.pangaea.de/dds-fdp/rest/panquery?datasetDOI=doi.pangaea.de/10.1594/PANGAEA.858207&filterParameterValue=1,TARA_N000000535	https://ws.pangaea.de/dds-fdp/rest/panquery?datasetDOI=doi.pangaea.de/10.1594/PANGAEA.842197&filterParameterValue=1,TARA_N000000535
TARA_N000000531	TARA_064	SEQ-(500mL-or-15min)_W5-20	TARA_064_DCM_5-20	Coastal Biome	[IO] Indian Ocean	[EAFR] Eastern Africa Coastal Province (MRGID:21473)	[DCM] deep chlorophyll maximum layer (ENVO:01000326)	2010-07-08T06:21	-29,5333	37,9117	54,69	2010-07-09	08:47	22,23	35,34	209,16	NA	0,23	0,08	546,18	492,70	0,02	800	0,16	https://ws.pangaea.de/dds-fdp/rest/panquery?datasetDOI=doi.pangaea.de/10.1594/PANGAEA.853810&filterParameterValue=1,TARA_N000000531	https://ws.pangaea.de/dds-fdp/rest/panquery?datasetDOI=doi.pangaea.de/10.1594/PANGAEA.858201&filterParameterValue=1,TARA_N000000531	https://ws.pangaea.de/dds-fdp/rest/panquery?datasetDOI=doi.pangaea.de/10.1594/PANGAEA.858207&filterParameterValue=1,TARA_N000000531	https://ws.pangaea.de/dds-fdp/rest/panquery?datasetDOI=doi.pangaea.de/10.1594/PANGAEA.842197&filterParameterValue=1,TARA_N000000531
TARA_N000000532	TARA_064	SEQ-(500mL-or-15min)_W5-20	TARA_064_DCM_5-20	Coastal Biome	[IO] Indian Ocean	[EAFR] Eastern Africa Coastal Province (MRGID:21473)	[DCM] deep chlorophyll maximum layer (ENVO:01000326)	2010-07-08T06:21	-29,5333	37,9117	54,69	2010-07-09	08:47	22,23	35,34	209,16	NA	0,23	0,08	546,18	492,70	0,02	800	0,16	https://ws.pangaea.de/dds-fdp/rest/panquery?datasetDOI=doi.pangaea.de/10.1594/PANGAEA.853810&filterParameterValue=1,TARA_N000000532	https://ws.pangaea.de/dds-fdp/rest/panquery?datasetDOI=doi.pangaea.de/10.1594/PANGAEA.858201&filterParameterValue=1,TARA_N000000532	https://ws.pangaea.de/dds-fdp/rest/panquery?datasetDOI=doi.pangaea.de/10.1594/PANGAEA.858207&filterParameterValue=1,TARA_N000000532	https://ws.pangaea.de/dds-fdp/rest/panquery?datasetDOI=doi.pangaea.de/10.1594/PANGAEA.842197&filterParameterValue=1,TARA_N000000532
TARA_N000000522	TARA_064	SEQ-(100L-or-15min)_W0.8-5	TARA_064_SRF_0.8-5	Coastal Biome	[IO] Indian Ocean	[EAFR] Eastern Africa Coastal Province (MRGID:21473)	[SRF] surface water layer (ENVO:00010504)	2010-07-07T04:48	-29,5019	37,9889	5,49	2010-07-08	07:15	22,17	35,33	210,01	NA	0,16	0,08	546,18	489,86	0,00	803	0,03	https://ws.pangaea.de/dds-fdp/rest/panquery?datasetDOI=doi.pangaea.de/10.1594/PANGAEA.853810&filterParameterValue=1,TARA_N000000522	https://ws.pangaea.de/dds-fdp/rest/panquery?datasetDOI=doi.pangaea.de/10.1594/PANGAEA.858201&filterParameterValue=1,TARA_N000000522	https://ws.pangaea.de/dds-fdp/rest/panquery?datasetDOI=doi.pangaea.de/10.1594/PANGAEA.858207&filterParameterValue=1,TARA_N000000522	https://ws.pangaea.de/dds-fdp/rest/panquery?datasetDOI=doi.pangaea.de/10.1594/PANGAEA.842197&filterParameterValue=1,TARA_N000000522
TARA_N000000539	TARA_064	SEQ-(500mL-or-15min)_N180-2000	TARA_064_SRF_180-2000	Coastal Biome	[IO] Indian Ocean	[EAFR] Eastern Africa Coastal Province (MRGID:21473)	[SRF] surface water layer (ENVO:00010504)	2010-07-07T05:17	-29,5018	37,9887	5,49	2010-07-08	07:44	22,17	35,33	210,01	NA	0,16	0,08	546,18	489,86	0,00	803	0,03	https://ws.pangaea.de/dds-fdp/rest/panquery?datasetDOI=doi.pangaea.de/10.1594/PANGAEA.853810&filterParameterValue=1,TARA_N000000539	https://ws.pangaea.de/dds-fdp/rest/panquery?datasetDOI=doi.pangaea.de/10.1594/PANGAEA.858201&filterParameterValue=1,TARA_N000000539	https://ws.pangaea.de/dds-fdp/rest/panquery?datasetDOI=doi.pangaea.de/10.1594/PANGAEA.858207&filterParameterValue=1,TARA_N000000539	https://ws.pangaea.de/dds-fdp/rest/panquery?datasetDOI=doi.pangaea.de/10.1594/PANGAEA.842197&filterParameterValue=1,TARA_N000000539
TARA_N000000526	TARA_064	SEQ-(500mL-or-15min)_N20-180	TARA_064_SRF_20-180	Coastal Biome	[IO] Indian Ocean	[EAFR] Eastern Africa Coastal Province (MRGID:21473)	[SRF] surface water layer (ENVO:00010504)	2010-07-07T07:53	-29,4985	37,9926	5,49	2010-07-08	10:20	22,17	35,33	210,01	NA	0,16	0,08	546,18	489,86	0,00	803	0,03	https://ws.pangaea.de/dds-fdp/rest/panquery?datasetDOI=doi.pangaea.de/10.1594/PANGAEA.853810&filterParameterValue=1,TARA_N000000526	https://ws.pangaea.de/dds-fdp/rest/panquery?datasetDOI=doi.pangaea.de/10.1594/PANGAEA.858201&filterParameterValue=1,TARA_N000000526	https://ws.pangaea.de/dds-fdp/rest/panquery?datasetDOI=doi.pangaea.de/10.1594/PANGAEA.858207&filterParameterValue=1,TARA_N000000526	https://ws.pangaea.de/dds-fdp/rest/panquery?datasetDOI=doi.pangaea.de/10.1594/PANGAEA.842197&filterParameterValue=1,TARA_N000000526
TARA_N000000927	TARA_064	SEQ-(500mL-or-15min)_N5-20	TARA_064_SRF_5-20	Coastal Biome	[IO] Indian Ocean	[EAFR] Eastern Africa Coastal Province (MRGID:21473)	[SRF] surface water layer (ENVO:00010504)	2010-07-07T07:14	-29,4991	37,9938	5,49	2010-07-08	09:41	22,17	35,33	210,01	NA	0,16	0,08	546,18	489,86	0,00	803	0,03	https://ws.pangaea.de/dds-fdp/rest/panquery?datasetDOI=doi.pangaea.de/10.1594/PANGAEA.853810&filterParameterValue=1,TARA_N000000927	https://ws.pangaea.de/dds-fdp/rest/panquery?datasetDOI=doi.pangaea.de/10.1594/PANGAEA.858201&filterParameterValue=1,TARA_N000000927	https://ws.pangaea.de/dds-fdp/rest/panquery?datasetDOI=doi.pangaea.de/10.1594/PANGAEA.858207&filterParameterValue=1,TARA_N000000927	https://ws.pangaea.de/dds-fdp/rest/panquery?datasetDOI=doi.pangaea.de/10.1594/PANGAEA.842197&filterParameterValue=1,TARA_N000000927
TARA_N000000928	TARA_064	SEQ-(500mL-or-15min)_N5-20	TARA_064_SRF_5-20	Coastal Biome	[IO] Indian Ocean	[EAFR] Eastern Africa Coastal Province (MRGID:21473)	[SRF] surface water layer (ENVO:00010504)	2010-07-07T07:14	-29,4991	37,9938	5,49	2010-07-08	09:41	22,17	35,33	210,01	NA	0,16	0,08	546,18	489,86	0,00	803	0,03	https://ws.pangaea.de/dds-fdp/rest/panquery?datasetDOI=doi.pangaea.de/10.1594/PANGAEA.853810&filterParameterValue=1,TARA_N000000928	https://ws.pangaea.de/dds-fdp/rest/panquery?datasetDOI=doi.pangaea.de/10.1594/PANGAEA.858201&filterParameterValue=1,TARA_N000000928	https://ws.pangaea.de/dds-fdp/rest/panquery?datasetDOI=doi.pangaea.de/10.1594/PANGAEA.858207&filterParameterValue=1,TARA_N000000928	https://ws.pangaea.de/dds-fdp/rest/panquery?datasetDOI=doi.pangaea.de/10.1594/PANGAEA.842197&filterParameterValue=1,TARA_N000000928
TARA_N000000939	TARA_065	SEQ-(500mL-or-15min)_W5-20	TARA_065_DCM_5-20	Coastal Biome	[IO] Indian Ocean	[EAFR] Eastern Africa Coastal Province (MRGID:21473)	[DCM] deep chlorophyll maximum layer (ENVO:01000326)	2010-07-12T11:03:22	-35,2421	26,3048	NA	2010-07-12	12:42	NA	NA	NA	NA	NA	NA	NA	502,04	NA	NA	0,24	https://ws.pangaea.de/dds-fdp/rest/panquery?datasetDOI=doi.pangaea.de/10.1594/PANGAEA.853810&filterParameterValue=1,TARA_N000000939	https://ws.pangaea.de/dds-fdp/rest/panquery?datasetDOI=doi.pangaea.de/10.1594/PANGAEA.858201&filterParameterValue=1,TARA_N000000939	https://ws.pangaea.de/dds-fdp/rest/panquery?datasetDOI=doi.pangaea.de/10.1594/PANGAEA.858207&filterParameterValue=1,TARA_N000000939	https://ws.pangaea.de/dds-fdp/rest/panquery?datasetDOI=doi.pangaea.de/10.1594/PANGAEA.842197&filterParameterValue=1,TARA_N000000939
TARA_N000000965	TARA_065	SEQ-(500mL-or-15min)_W5-20	TARA_065_DCM_5-20	Coastal Biome	[IO] Indian Ocean	[EAFR] Eastern Africa Coastal Province (MRGID:21473)	[DCM] deep chlorophyll maximum layer (ENVO:01000326)	2010-07-12T11:03:22	-35,2421	26,3048	NA	2010-07-12	12:42	NA	NA	NA	NA	NA	NA	NA	502,04	NA	NA	0,24	https://ws.pangaea.de/dds-fdp/rest/panquery?datasetDOI=doi.pangaea.de/10.1594/PANGAEA.853810&filterParameterValue=1,TARA_N000000965	https://ws.pangaea.de/dds-fdp/rest/panquery?datasetDOI=doi.pangaea.de/10.1594/PANGAEA.858201&filterParameterValue=1,TARA_N000000965	https://ws.pangaea.de/dds-fdp/rest/panquery?datasetDOI=doi.pangaea.de/10.1594/PANGAEA.858207&filterParameterValue=1,TARA_N000000965	https://ws.pangaea.de/dds-fdp/rest/panquery?datasetDOI=doi.pangaea.de/10.1594/PANGAEA.842197&filterParameterValue=1,TARA_N000000965
TARA_N000000933	TARA_065	SEQ-(100L-or-15min)_W0.8-5	TARA_065_SRF_0.8-5	Coastal Biome	[IO] Indian Ocean	[EAFR] Eastern Africa Coastal Province (MRGID:21473)	[SRF] surface water layer (ENVO:00010504)	2010-07-12T05:59	-35,1728	26,2868	5,90	2010-07-13	07:38	21,82	35,45	207,04	NA	0,22	NA	91,95	502,04	NA	761	0,25	https://ws.pangaea.de/dds-fdp/rest/panquery?datasetDOI=doi.pangaea.de/10.1594/PANGAEA.853810&filterParameterValue=1,TARA_N000000933	https://ws.pangaea.de/dds-fdp/rest/panquery?datasetDOI=doi.pangaea.de/10.1594/PANGAEA.858201&filterParameterValue=1,TARA_N000000933	https://ws.pangaea.de/dds-fdp/rest/panquery?datasetDOI=doi.pangaea.de/10.1594/PANGAEA.858207&filterParameterValue=1,TARA_N000000933	https://ws.pangaea.de/dds-fdp/rest/panquery?datasetDOI=doi.pangaea.de/10.1594/PANGAEA.842197&filterParameterValue=1,TARA_N000000933
TARA_N000000959	TARA_065	SEQ-(100L-or-15min)_W0.8-5	TARA_065_SRF_0.8-5	Coastal Biome	[IO] Indian Ocean	[EAFR] Eastern Africa Coastal Province (MRGID:21473)	[SRF] surface water layer (ENVO:00010504)	2010-07-12T05:59	-35,1728	26,2868	5,90	2010-07-13	07:38	21,82	35,45	207,04	NA	0,22	NA	91,95	502,04	NA	761	0,25	https://ws.pangaea.de/dds-fdp/rest/panquery?datasetDOI=doi.pangaea.de/10.1594/PANGAEA.853810&filterParameterValue=1,TARA_N000000959	https://ws.pangaea.de/dds-fdp/rest/panquery?datasetDOI=doi.pangaea.de/10.1594/PANGAEA.858201&filterParameterValue=1,TARA_N000000959	https://ws.pangaea.de/dds-fdp/rest/panquery?datasetDOI=doi.pangaea.de/10.1594/PANGAEA.858207&filterParameterValue=1,TARA_N000000959	https://ws.pangaea.de/dds-fdp/rest/panquery?datasetDOI=doi.pangaea.de/10.1594/PANGAEA.842197&filterParameterValue=1,TARA_N000000959
TARA_N000000981	TARA_065	SEQ-(500mL-or-15min)_N180-2000	TARA_065_SRF_180-2000	Coastal Biome	[IO] Indian Ocean	[EAFR] Eastern Africa Coastal Province (MRGID:21473)	[SRF] surface water layer (ENVO:00010504)	2010-07-12T06:36	-35,1808	26,2879	5,90	2010-07-13	08:15	21,82	35,45	207,04	NA	0,22	NA	91,95	502,04	NA	761	0,25	https://ws.pangaea.de/dds-fdp/rest/panquery?datasetDOI=doi.pangaea.de/10.1594/PANGAEA.853810&filterParameterValue=1,TARA_N000000981	https://ws.pangaea.de/dds-fdp/rest/panquery?datasetDOI=doi.pangaea.de/10.1594/PANGAEA.858201&filterParameterValue=1,TARA_N000000981	https://ws.pangaea.de/dds-fdp/rest/panquery?datasetDOI=doi.pangaea.de/10.1594/PANGAEA.858207&filterParameterValue=1,TARA_N000000981	https://ws.pangaea.de/dds-fdp/rest/panquery?datasetDOI=doi.pangaea.de/10.1594/PANGAEA.842197&filterParameterValue=1,TARA_N000000981
TARA_N000000968	TARA_065	SEQ-(500mL-or-15min)_N20-180	TARA_065_SRF_20-180	Coastal Biome	[IO] Indian Ocean	[EAFR] Eastern Africa Coastal Province (MRGID:21473)	[SRF] surface water layer (ENVO:00010504)	2010-07-12T10:30	-35,2351	26,3022	5,90	2010-07-12	12:09	21,82	35,45	207,04	NA	0,22	NA	91,95	502,04	NA	761	0,25	https://ws.pangaea.de/dds-fdp/rest/panquery?datasetDOI=doi.pangaea.de/10.1594/PANGAEA.853810&filterParameterValue=1,TARA_N000000968	https://ws.pangaea.de/dds-fdp/rest/panquery?datasetDOI=doi.pangaea.de/10.1594/PANGAEA.858201&filterParameterValue=1,TARA_N000000968	https://ws.pangaea.de/dds-fdp/rest/panquery?datasetDOI=doi.pangaea.de/10.1594/PANGAEA.858207&filterParameterValue=1,TARA_N000000968	https://ws.pangaea.de/dds-fdp/rest/panquery?datasetDOI=doi.pangaea.de/10.1594/PANGAEA.842197&filterParameterValue=1,TARA_N000000968
TARA_N000000963	TARA_065	SEQ-(500mL-or-15min)_W5-20	TARA_065_SRF_5-20	Coastal Biome	[IO] Indian Ocean	[EAFR] Eastern Africa Coastal Province (MRGID:21473)	[SRF] surface water layer (ENVO:00010504)	2010-07-12T05:59	-35,1728	26,2868	5,90	2010-07-13	07:38	21,82	35,45	207,04	NA	0,22	NA	91,95	502,04	NA	761	0,25	https://ws.pangaea.de/dds-fdp/rest/panquery?datasetDOI=doi.pangaea.de/10.1594/PANGAEA.853810&filterParameterValue=1,TARA_N000000963	https://ws.pangaea.de/dds-fdp/rest/panquery?datasetDOI=doi.pangaea.de/10.1594/PANGAEA.858201&filterParameterValue=1,TARA_N000000963	https://ws.pangaea.de/dds-fdp/rest/panquery?datasetDOI=doi.pangaea.de/10.1594/PANGAEA.858207&filterParameterValue=1,TARA_N000000963	https://ws.pangaea.de/dds-fdp/rest/panquery?datasetDOI=doi.pangaea.de/10.1594/PANGAEA.842197&filterParameterValue=1,TARA_N000000963
TARA_N000000807	TARA_066	SEQ-(100L-or-15min)_W0.8-5	TARA_066_DCM_0.8-5	Coastal Biome	[SAO] South Atlantic Ocean	[BENG] Benguela Current Coastal Province (MRGID:21470)	[DCM] deep chlorophyll maximum layer (ENVO:01000326)	2010-07-15T15:36:10	-34,8901	18,0459	NA	2010-07-15	16:42	NA	NA	NA	NA	NA	NA	NA	561,02	3,23	NA	0,50	https://ws.pangaea.de/dds-fdp/rest/panquery?datasetDOI=doi.pangaea.de/10.1594/PANGAEA.853810&filterParameterValue=1,TARA_N000000807	https://ws.pangaea.de/dds-fdp/rest/panquery?datasetDOI=doi.pangaea.de/10.1594/PANGAEA.858201&filterParameterValue=1,TARA_N000000807	https://ws.pangaea.de/dds-fdp/rest/panquery?datasetDOI=doi.pangaea.de/10.1594/PANGAEA.858207&filterParameterValue=1,TARA_N000000807	https://ws.pangaea.de/dds-fdp/rest/panquery?datasetDOI=doi.pangaea.de/10.1594/PANGAEA.842197&filterParameterValue=1,TARA_N000000807
TARA_N000000791	TARA_066	SEQ-(500mL-or-15min)_W5-20	TARA_066_DCM_5-20	Coastal Biome	[SAO] South Atlantic Ocean	[BENG] Benguela Current Coastal Province (MRGID:21470)	[DCM] deep chlorophyll maximum layer (ENVO:01000326)	2010-07-15T15:36:10	-34,8901	18,0459	NA	2010-07-15	16:42	NA	NA	NA	NA	NA	NA	NA	561,02	3,23	NA	0,50	https://ws.pangaea.de/dds-fdp/rest/panquery?datasetDOI=doi.pangaea.de/10.1594/PANGAEA.853810&filterParameterValue=1,TARA_N000000791	https://ws.pangaea.de/dds-fdp/rest/panquery?datasetDOI=doi.pangaea.de/10.1594/PANGAEA.858201&filterParameterValue=1,TARA_N000000791	https://ws.pangaea.de/dds-fdp/rest/panquery?datasetDOI=doi.pangaea.de/10.1594/PANGAEA.858207&filterParameterValue=1,TARA_N000000791	https://ws.pangaea.de/dds-fdp/rest/panquery?datasetDOI=doi.pangaea.de/10.1594/PANGAEA.842197&filterParameterValue=1,TARA_N000000791
TARA_N000000805	TARA_066	SEQ-(100L-or-15min)_W0.8-5	TARA_066_SRF_0.8-5	Coastal Biome	[SAO] South Atlantic Ocean	[BENG] Benguela Current Coastal Province (MRGID:21470)	[SRF] surface water layer (ENVO:00010504)	2010-07-15T12:22	-34,9449	17,9189	5,39	2010-07-15	13:27	15,03	35,32	238,92	2,45	0,25	0,34	71,81	715,14	3,34	312	0,38	https://ws.pangaea.de/dds-fdp/rest/panquery?datasetDOI=doi.pangaea.de/10.1594/PANGAEA.853810&filterParameterValue=1,TARA_N000000805	https://ws.pangaea.de/dds-fdp/rest/panquery?datasetDOI=doi.pangaea.de/10.1594/PANGAEA.858201&filterParameterValue=1,TARA_N000000805	https://ws.pangaea.de/dds-fdp/rest/panquery?datasetDOI=doi.pangaea.de/10.1594/PANGAEA.858207&filterParameterValue=1,TARA_N000000805	https://ws.pangaea.de/dds-fdp/rest/panquery?datasetDOI=doi.pangaea.de/10.1594/PANGAEA.842197&filterParameterValue=1,TARA_N000000805
TARA_N000000790	TARA_066	SEQ-(500mL-or-15min)_N180-2000	TARA_066_SRF_180-2000	Coastal Biome	[SAO] South Atlantic Ocean	[BENG] Benguela Current Coastal Province (MRGID:21470)	[SRF] surface water layer (ENVO:00010504)	2010-07-15T12:55	-34,9363	17,9366	5,39	2010-07-15	14:00	15,03	35,32	238,92	2,45	0,25	0,34	71,81	715,14	3,34	312	0,38	https://ws.pangaea.de/dds-fdp/rest/panquery?datasetDOI=doi.pangaea.de/10.1594/PANGAEA.853810&filterParameterValue=1,TARA_N000000790	https://ws.pangaea.de/dds-fdp/rest/panquery?datasetDOI=doi.pangaea.de/10.1594/PANGAEA.858201&filterParameterValue=1,TARA_N000000790	https://ws.pangaea.de/dds-fdp/rest/panquery?datasetDOI=doi.pangaea.de/10.1594/PANGAEA.858207&filterParameterValue=1,TARA_N000000790	https://ws.pangaea.de/dds-fdp/rest/panquery?datasetDOI=doi.pangaea.de/10.1594/PANGAEA.842197&filterParameterValue=1,TARA_N000000790
TARA_N000000793	TARA_066	SEQ-(500mL-or-15min)_N20-180	TARA_066_SRF_20-180	Coastal Biome	[SAO] South Atlantic Ocean	[BENG] Benguela Current Coastal Province (MRGID:21470)	[SRF] surface water layer (ENVO:00010504)	2010-07-15T15:16	-34,8986	18,03	5,39	2010-07-15	16:22	15,03	35,32	238,92	2,45	0,25	0,34	71,81	715,14	3,34	312	0,38	https://ws.pangaea.de/dds-fdp/rest/panquery?datasetDOI=doi.pangaea.de/10.1594/PANGAEA.853810&filterParameterValue=1,TARA_N000000793	https://ws.pangaea.de/dds-fdp/rest/panquery?datasetDOI=doi.pangaea.de/10.1594/PANGAEA.858201&filterParameterValue=1,TARA_N000000793	https://ws.pangaea.de/dds-fdp/rest/panquery?datasetDOI=doi.pangaea.de/10.1594/PANGAEA.858207&filterParameterValue=1,TARA_N000000793	https://ws.pangaea.de/dds-fdp/rest/panquery?datasetDOI=doi.pangaea.de/10.1594/PANGAEA.842197&filterParameterValue=1,TARA_N000000793
TARA_N000000809	TARA_066	SEQ-(500mL-or-15min)_W5-20	TARA_066_SRF_5-20	Coastal Biome	[SAO] South Atlantic Ocean	[BENG] Benguela Current Coastal Province (MRGID:21470)	[SRF] surface water layer (ENVO:00010504)	2010-07-15T12:22	-34,9449	17,9189	5,39	2010-07-15	13:27	15,03	35,32	238,92	2,45	0,25	0,34	71,81	715,14	3,34	312	0,38	https://ws.pangaea.de/dds-fdp/rest/panquery?datasetDOI=doi.pangaea.de/10.1594/PANGAEA.853810&filterParameterValue=1,TARA_N000000809	https://ws.pangaea.de/dds-fdp/rest/panquery?datasetDOI=doi.pangaea.de/10.1594/PANGAEA.858201&filterParameterValue=1,TARA_N000000809	https://ws.pangaea.de/dds-fdp/rest/panquery?datasetDOI=doi.pangaea.de/10.1594/PANGAEA.858207&filterParameterValue=1,TARA_N000000809	https://ws.pangaea.de/dds-fdp/rest/panquery?datasetDOI=doi.pangaea.de/10.1594/PANGAEA.842197&filterParameterValue=1,TARA_N000000809
TARA_N000000759	TARA_067	SEQ-(100L-or-15min)_W>0.8	TARA_067_SRF_0.8-2000	Coastal Biome	[SAO] South Atlantic Ocean	[BENG] Benguela Current Coastal Province (MRGID:21470)	[SRF] surface water layer (ENVO:00010504)	2010-09-07T06:19	-32,2401	17,7103	5,45	2010-09-08	07:31	12,83	34,85	249,35	0,41	NA	1,02	55,51	6662,87	7,09	431	0,26	https://ws.pangaea.de/dds-fdp/rest/panquery?datasetDOI=doi.pangaea.de/10.1594/PANGAEA.853810&filterParameterValue=1,TARA_N000000759	https://ws.pangaea.de/dds-fdp/rest/panquery?datasetDOI=doi.pangaea.de/10.1594/PANGAEA.858201&filterParameterValue=1,TARA_N000000759	https://ws.pangaea.de/dds-fdp/rest/panquery?datasetDOI=doi.pangaea.de/10.1594/PANGAEA.858207&filterParameterValue=1,TARA_N000000759	https://ws.pangaea.de/dds-fdp/rest/panquery?datasetDOI=doi.pangaea.de/10.1594/PANGAEA.842197&filterParameterValue=1,TARA_N000000759
TARA_N000000756	TARA_067	SEQ-(100L-or-15min)_W0.8-5	TARA_067_SRF_0.8-5	Coastal Biome	[SAO] South Atlantic Ocean	[BENG] Benguela Current Coastal Province (MRGID:21470)	[SRF] surface water layer (ENVO:00010504)	2010-09-07T06:19	-32,2401	17,7103	5,45	2010-09-08	07:31	12,83	34,85	249,35	0,41	NA	1,02	55,51	6662,87	7,09	431	0,26	https://ws.pangaea.de/dds-fdp/rest/panquery?datasetDOI=doi.pangaea.de/10.1594/PANGAEA.853810&filterParameterValue=1,TARA_N000000756	https://ws.pangaea.de/dds-fdp/rest/panquery?datasetDOI=doi.pangaea.de/10.1594/PANGAEA.858201&filterParameterValue=1,TARA_N000000756	https://ws.pangaea.de/dds-fdp/rest/panquery?datasetDOI=doi.pangaea.de/10.1594/PANGAEA.858207&filterParameterValue=1,TARA_N000000756	https://ws.pangaea.de/dds-fdp/rest/panquery?datasetDOI=doi.pangaea.de/10.1594/PANGAEA.842197&filterParameterValue=1,TARA_N000000756
TARA_N000000750	TARA_067	SEQ-(500mL-or-15min)_N180-2000	TARA_067_SRF_180-2000	Coastal Biome	[SAO] South Atlantic Ocean	[BENG] Benguela Current Coastal Province (MRGID:21470)	[SRF] surface water layer (ENVO:00010504)	2010-09-07T06:59	-32,2188	17,7054	5,45	2010-09-08	08:11	12,83	34,85	249,35	0,41	NA	1,02	55,51	6662,87	7,09	431	0,26	https://ws.pangaea.de/dds-fdp/rest/panquery?datasetDOI=doi.pangaea.de/10.1594/PANGAEA.853810&filterParameterValue=1,TARA_N000000750	https://ws.pangaea.de/dds-fdp/rest/panquery?datasetDOI=doi.pangaea.de/10.1594/PANGAEA.858201&filterParameterValue=1,TARA_N000000750	https://ws.pangaea.de/dds-fdp/rest/panquery?datasetDOI=doi.pangaea.de/10.1594/PANGAEA.858207&filterParameterValue=1,TARA_N000000750	https://ws.pangaea.de/dds-fdp/rest/panquery?datasetDOI=doi.pangaea.de/10.1594/PANGAEA.842197&filterParameterValue=1,TARA_N000000750
TARA_N000000746	TARA_067	SEQ-(500mL-or-15min)_N20-180	TARA_067_SRF_20-180	Coastal Biome	[SAO] South Atlantic Ocean	[BENG] Benguela Current Coastal Province (MRGID:21470)	[SRF] surface water layer (ENVO:00010504)	2010-09-07T08:25	-32,1745	17,6991	5,45	2010-09-08	09:37	12,83	34,85	249,35	0,41	NA	1,02	55,51	6662,87	7,09	431	0,26	https://ws.pangaea.de/dds-fdp/rest/panquery?datasetDOI=doi.pangaea.de/10.1594/PANGAEA.853810&filterParameterValue=1,TARA_N000000746	https://ws.pangaea.de/dds-fdp/rest/panquery?datasetDOI=doi.pangaea.de/10.1594/PANGAEA.858201&filterParameterValue=1,TARA_N000000746	https://ws.pangaea.de/dds-fdp/rest/panquery?datasetDOI=doi.pangaea.de/10.1594/PANGAEA.858207&filterParameterValue=1,TARA_N000000746	https://ws.pangaea.de/dds-fdp/rest/panquery?datasetDOI=doi.pangaea.de/10.1594/PANGAEA.842197&filterParameterValue=1,TARA_N000000746
TARA_N000000742	TARA_067	SEQ-(500mL-or-15min)_N5-20	TARA_067_SRF_5-20	Coastal Biome	[SAO] South Atlantic Ocean	[BENG] Benguela Current Coastal Province (MRGID:21470)	[SRF] surface water layer (ENVO:00010504)	2010-09-07T10:16	-32,12	17,6987	5,45	2010-09-08	11:28	12,83	34,85	249,35	0,41	NA	1,02	55,51	6662,87	7,09	431	0,26	https://ws.pangaea.de/dds-fdp/rest/panquery?datasetDOI=doi.pangaea.de/10.1594/PANGAEA.853810&filterParameterValue=1,TARA_N000000742	https://ws.pangaea.de/dds-fdp/rest/panquery?datasetDOI=doi.pangaea.de/10.1594/PANGAEA.858201&filterParameterValue=1,TARA_N000000742	https://ws.pangaea.de/dds-fdp/rest/panquery?datasetDOI=doi.pangaea.de/10.1594/PANGAEA.858207&filterParameterValue=1,TARA_N000000742	https://ws.pangaea.de/dds-fdp/rest/panquery?datasetDOI=doi.pangaea.de/10.1594/PANGAEA.842197&filterParameterValue=1,TARA_N000000742
TARA_N000000720	TARA_068	SEQ-(100L-or-15min)_W>0.8	TARA_068_DCM_0.8-2000	Trades Biome	[SAO] South Atlantic Ocean	[SATL] South Atlantic Gyral Province (MRGID:21459)	[DCM] deep chlorophyll maximum layer (ENVO:01000326)	2010-09-14T13:30	-31027	4,6802	49,68	2010-09-14	13:53	16,78	35,69	231,61	NA	0,44	0,23	1113,16	498,05	1,08	373	0,07	https://ws.pangaea.de/dds-fdp/rest/panquery?datasetDOI=doi.pangaea.de/10.1594/PANGAEA.853810&filterParameterValue=1,TARA_N000000720	https://ws.pangaea.de/dds-fdp/rest/panquery?datasetDOI=doi.pangaea.de/10.1594/PANGAEA.858201&filterParameterValue=1,TARA_N000000720	https://ws.pangaea.de/dds-fdp/rest/panquery?datasetDOI=doi.pangaea.de/10.1594/PANGAEA.858207&filterParameterValue=1,TARA_N000000720	https://ws.pangaea.de/dds-fdp/rest/panquery?datasetDOI=doi.pangaea.de/10.1594/PANGAEA.842197&filterParameterValue=1,TARA_N000000720
TARA_N000000728	TARA_068	SEQ-(100L-or-15min)_W0.8-5	TARA_068_DCM_0.8-5	Trades Biome	[SAO] South Atlantic Ocean	[SATL] South Atlantic Gyral Province (MRGID:21459)	[DCM] deep chlorophyll maximum layer (ENVO:01000326)	2010-09-14T13:30	-31027	4,6802	49,68	2010-09-14	13:53	16,78	35,69	231,61	NA	0,44	0,23	1113,16	498,05	1,08	373	0,07	https://ws.pangaea.de/dds-fdp/rest/panquery?datasetDOI=doi.pangaea.de/10.1594/PANGAEA.853810&filterParameterValue=1,TARA_N000000728	https://ws.pangaea.de/dds-fdp/rest/panquery?datasetDOI=doi.pangaea.de/10.1594/PANGAEA.858201&filterParameterValue=1,TARA_N000000728	https://ws.pangaea.de/dds-fdp/rest/panquery?datasetDOI=doi.pangaea.de/10.1594/PANGAEA.858207&filterParameterValue=1,TARA_N000000728	https://ws.pangaea.de/dds-fdp/rest/panquery?datasetDOI=doi.pangaea.de/10.1594/PANGAEA.842197&filterParameterValue=1,TARA_N000000728
TARA_N000000711	TARA_068	SEQ-(500mL-or-15min)_N180-2000	TARA_068_DCM_180-2000	Trades Biome	[SAO] South Atlantic Ocean	[SATL] South Atlantic Gyral Province (MRGID:21459)	[DCM] deep chlorophyll maximum layer (ENVO:01000326)	2010-09-14T12:56	-31,0292	4,6742	49,68	2010-09-14	13:19	16,78	35,69	231,61	NA	0,44	0,23	1113,16	498,05	1,08	373	0,07	https://ws.pangaea.de/dds-fdp/rest/panquery?datasetDOI=doi.pangaea.de/10.1594/PANGAEA.853810&filterParameterValue=1,TARA_N000000711	https://ws.pangaea.de/dds-fdp/rest/panquery?datasetDOI=doi.pangaea.de/10.1594/PANGAEA.858201&filterParameterValue=1,TARA_N000000711	https://ws.pangaea.de/dds-fdp/rest/panquery?datasetDOI=doi.pangaea.de/10.1594/PANGAEA.858207&filterParameterValue=1,TARA_N000000711	https://ws.pangaea.de/dds-fdp/rest/panquery?datasetDOI=doi.pangaea.de/10.1594/PANGAEA.842197&filterParameterValue=1,TARA_N000000711
TARA_N000000703	TARA_068	SEQ-(500mL-or-15min)_W5-20	TARA_068_DCM_5-20	Trades Biome	[SAO] South Atlantic Ocean	[SATL] South Atlantic Gyral Province (MRGID:21459)	[DCM] deep chlorophyll maximum layer (ENVO:01000326)	2010-09-14T13:30	-31027	4,6802	49,68	2010-09-14	13:53	16,78	35,69	231,61	NA	0,44	0,23	1113,16	498,05	1,08	373	0,07	https://ws.pangaea.de/dds-fdp/rest/panquery?datasetDOI=doi.pangaea.de/10.1594/PANGAEA.853810&filterParameterValue=1,TARA_N000000703	https://ws.pangaea.de/dds-fdp/rest/panquery?datasetDOI=doi.pangaea.de/10.1594/PANGAEA.858201&filterParameterValue=1,TARA_N000000703	https://ws.pangaea.de/dds-fdp/rest/panquery?datasetDOI=doi.pangaea.de/10.1594/PANGAEA.858207&filterParameterValue=1,TARA_N000000703	https://ws.pangaea.de/dds-fdp/rest/panquery?datasetDOI=doi.pangaea.de/10.1594/PANGAEA.842197&filterParameterValue=1,TARA_N000000703
TARA_N000000713	TARA_068	SEQ-(100L-or-15min)_W0.8-3	TARA_068_MES_0.8-3	Trades Biome	[SAO] South Atlantic Ocean	[SATL] South Atlantic Gyral Province (MRGID:21459)	[MES] marine water layer (ENVO:01000295) within the mesopelagic zone (ENVO:00000213)	2010-09-13T13:02:33	-31,0198	4,6685	NA	2010-09-13	13:24	NA	NA	NA	NA	NA	NA	NA	NA	NA	NA	NA	https://ws.pangaea.de/dds-fdp/rest/panquery?datasetDOI=doi.pangaea.de/10.1594/PANGAEA.853810&filterParameterValue=1,TARA_N000000713	https://ws.pangaea.de/dds-fdp/rest/panquery?datasetDOI=doi.pangaea.de/10.1594/PANGAEA.858201&filterParameterValue=1,TARA_N000000713	https://ws.pangaea.de/dds-fdp/rest/panquery?datasetDOI=doi.pangaea.de/10.1594/PANGAEA.858207&filterParameterValue=1,TARA_N000000713	https://ws.pangaea.de/dds-fdp/rest/panquery?datasetDOI=doi.pangaea.de/10.1594/PANGAEA.842197&filterParameterValue=1,TARA_N000000713
TARA_N000000722	TARA_068	SEQ-(100L-or-15min)_W0.8-5	TARA_068_SRF_0.8-5	Trades Biome	[SAO] South Atlantic Ocean	[SATL] South Atlantic Gyral Province (MRGID:21459)	[SRF] surface water layer (ENVO:00010504)	2010-09-14T06:55	-31,0266	4665	5,43	2010-09-15	07:17	16,95	35,69	234,24	2,10	0,55	0,23	1113,16	498,05	1,30	374	0,01	https://ws.pangaea.de/dds-fdp/rest/panquery?datasetDOI=doi.pangaea.de/10.1594/PANGAEA.853810&filterParameterValue=1,TARA_N000000722	https://ws.pangaea.de/dds-fdp/rest/panquery?datasetDOI=doi.pangaea.de/10.1594/PANGAEA.858201&filterParameterValue=1,TARA_N000000722	https://ws.pangaea.de/dds-fdp/rest/panquery?datasetDOI=doi.pangaea.de/10.1594/PANGAEA.858207&filterParameterValue=1,TARA_N000000722	https://ws.pangaea.de/dds-fdp/rest/panquery?datasetDOI=doi.pangaea.de/10.1594/PANGAEA.842197&filterParameterValue=1,TARA_N000000722
TARA_N000000709	TARA_068	SEQ-(500mL-or-15min)_N180-2000	TARA_068_SRF_180-2000	Trades Biome	[SAO] South Atlantic Ocean	[SATL] South Atlantic Gyral Province (MRGID:21459)	[SRF] surface water layer (ENVO:00010504)	2010-09-13T20:20	-31,0507	4,6603	5,43	2010-09-13	20:42	16,95	35,69	234,24	2,10	0,55	0,23	1113,16	498,05	1,30	374	0,01	https://ws.pangaea.de/dds-fdp/rest/panquery?datasetDOI=doi.pangaea.de/10.1594/PANGAEA.853810&filterParameterValue=1,TARA_N000000709	https://ws.pangaea.de/dds-fdp/rest/panquery?datasetDOI=doi.pangaea.de/10.1594/PANGAEA.858201&filterParameterValue=1,TARA_N000000709	https://ws.pangaea.de/dds-fdp/rest/panquery?datasetDOI=doi.pangaea.de/10.1594/PANGAEA.858207&filterParameterValue=1,TARA_N000000709	https://ws.pangaea.de/dds-fdp/rest/panquery?datasetDOI=doi.pangaea.de/10.1594/PANGAEA.842197&filterParameterValue=1,TARA_N000000709
TARA_N000000705	TARA_068	SEQ-(500mL-or-15min)_N20-180	TARA_068_SRF_20-180	Trades Biome	[SAO] South Atlantic Ocean	[SATL] South Atlantic Gyral Province (MRGID:21459)	[SRF] surface water layer (ENVO:00010504)	2010-09-13T21:35	-31,0551	4668	5,43	2010-09-13	21:57	16,95	35,69	234,24	2,10	0,55	0,23	1113,16	498,05	1,30	374	0,01	https://ws.pangaea.de/dds-fdp/rest/panquery?datasetDOI=doi.pangaea.de/10.1594/PANGAEA.853810&filterParameterValue=1,TARA_N000000705	https://ws.pangaea.de/dds-fdp/rest/panquery?datasetDOI=doi.pangaea.de/10.1594/PANGAEA.858201&filterParameterValue=1,TARA_N000000705	https://ws.pangaea.de/dds-fdp/rest/panquery?datasetDOI=doi.pangaea.de/10.1594/PANGAEA.858207&filterParameterValue=1,TARA_N000000705	https://ws.pangaea.de/dds-fdp/rest/panquery?datasetDOI=doi.pangaea.de/10.1594/PANGAEA.842197&filterParameterValue=1,TARA_N000000705
TARA_N000000701	TARA_068	SEQ-(500mL-or-15min)_N5-20	TARA_068_SRF_5-20	Trades Biome	[SAO] South Atlantic Ocean	[SATL] South Atlantic Gyral Province (MRGID:21459)	[SRF] surface water layer (ENVO:00010504)	2010-09-13T22:37	-31,0536	4,6742	5,43	2010-09-13	22:59	16,95	35,69	234,24	2,10	0,55	0,23	1113,16	498,05	1,30	374	0,01	https://ws.pangaea.de/dds-fdp/rest/panquery?datasetDOI=doi.pangaea.de/10.1594/PANGAEA.853810&filterParameterValue=1,TARA_N000000701	https://ws.pangaea.de/dds-fdp/rest/panquery?datasetDOI=doi.pangaea.de/10.1594/PANGAEA.858201&filterParameterValue=1,TARA_N000000701	https://ws.pangaea.de/dds-fdp/rest/panquery?datasetDOI=doi.pangaea.de/10.1594/PANGAEA.858207&filterParameterValue=1,TARA_N000000701	https://ws.pangaea.de/dds-fdp/rest/panquery?datasetDOI=doi.pangaea.de/10.1594/PANGAEA.842197&filterParameterValue=1,TARA_N000000701
TARA_N000000674	TARA_070	SEQ-(100L-or-15min)_W>0.8	TARA_070_SRF_0.8-2000	Trades Biome	[SAO] South Atlantic Ocean	[SATL] South Atlantic Gyral Province (MRGID:21459)	[SRF] surface water layer (ENVO:00010504)	2010-09-21T06:55	-20,4091	-3,1759	5,40	2010-09-22	06:49	19,78	36,38	215,65	0,17	0,32	0,36	554,71	440,22	0,99	793	0,04	https://ws.pangaea.de/dds-fdp/rest/panquery?datasetDOI=doi.pangaea.de/10.1594/PANGAEA.853810&filterParameterValue=1,TARA_N000000674	https://ws.pangaea.de/dds-fdp/rest/panquery?datasetDOI=doi.pangaea.de/10.1594/PANGAEA.858201&filterParameterValue=1,TARA_N000000674	https://ws.pangaea.de/dds-fdp/rest/panquery?datasetDOI=doi.pangaea.de/10.1594/PANGAEA.858207&filterParameterValue=1,TARA_N000000674	https://ws.pangaea.de/dds-fdp/rest/panquery?datasetDOI=doi.pangaea.de/10.1594/PANGAEA.842197&filterParameterValue=1,TARA_N000000674
TARA_N000000678	TARA_070	SEQ-(100L-or-15min)_W0.8-5	TARA_070_SRF_0.8-5	Trades Biome	[SAO] South Atlantic Ocean	[SATL] South Atlantic Gyral Province (MRGID:21459)	[SRF] surface water layer (ENVO:00010504)	2010-09-21T06:55	-20,4091	-3,1759	5,40	2010-09-22	06:49	19,78	36,38	215,65	0,17	0,32	0,36	554,71	440,22	0,99	793	0,04	https://ws.pangaea.de/dds-fdp/rest/panquery?datasetDOI=doi.pangaea.de/10.1594/PANGAEA.853810&filterParameterValue=1,TARA_N000000678	https://ws.pangaea.de/dds-fdp/rest/panquery?datasetDOI=doi.pangaea.de/10.1594/PANGAEA.858201&filterParameterValue=1,TARA_N000000678	https://ws.pangaea.de/dds-fdp/rest/panquery?datasetDOI=doi.pangaea.de/10.1594/PANGAEA.858207&filterParameterValue=1,TARA_N000000678	https://ws.pangaea.de/dds-fdp/rest/panquery?datasetDOI=doi.pangaea.de/10.1594/PANGAEA.842197&filterParameterValue=1,TARA_N000000678
TARA_N000000666	TARA_070	SEQ-(500mL-or-15min)_N180-2000	TARA_070_SRF_180-2000	Trades Biome	[SAO] South Atlantic Ocean	[SATL] South Atlantic Gyral Province (MRGID:21459)	[SRF] surface water layer (ENVO:00010504)	2010-09-21T07:22	-20,4035	-3,1859	5,40	2010-09-22	07:16	19,78	36,38	215,65	0,17	0,32	0,36	554,71	440,22	0,99	793	0,04	https://ws.pangaea.de/dds-fdp/rest/panquery?datasetDOI=doi.pangaea.de/10.1594/PANGAEA.853810&filterParameterValue=1,TARA_N000000666	https://ws.pangaea.de/dds-fdp/rest/panquery?datasetDOI=doi.pangaea.de/10.1594/PANGAEA.858201&filterParameterValue=1,TARA_N000000666	https://ws.pangaea.de/dds-fdp/rest/panquery?datasetDOI=doi.pangaea.de/10.1594/PANGAEA.858207&filterParameterValue=1,TARA_N000000666	https://ws.pangaea.de/dds-fdp/rest/panquery?datasetDOI=doi.pangaea.de/10.1594/PANGAEA.842197&filterParameterValue=1,TARA_N000000666
TARA_N000000662	TARA_070	SEQ-(500mL-or-15min)_N20-180	TARA_070_SRF_20-180	Trades Biome	[SAO] South Atlantic Ocean	[SATL] South Atlantic Gyral Province (MRGID:21459)	[SRF] surface water layer (ENVO:00010504)	2010-09-21T08:23	-20,3943	-3,2085	5,40	2010-09-22	08:16	19,78	36,38	215,65	0,17	0,32	0,36	554,71	440,22	0,99	793	0,04	https://ws.pangaea.de/dds-fdp/rest/panquery?datasetDOI=doi.pangaea.de/10.1594/PANGAEA.853810&filterParameterValue=1,TARA_N000000662	https://ws.pangaea.de/dds-fdp/rest/panquery?datasetDOI=doi.pangaea.de/10.1594/PANGAEA.858201&filterParameterValue=1,TARA_N000000662	https://ws.pangaea.de/dds-fdp/rest/panquery?datasetDOI=doi.pangaea.de/10.1594/PANGAEA.858207&filterParameterValue=1,TARA_N000000662	https://ws.pangaea.de/dds-fdp/rest/panquery?datasetDOI=doi.pangaea.de/10.1594/PANGAEA.842197&filterParameterValue=1,TARA_N000000662
TARA_N000000682	TARA_070	SEQ-(500mL-or-15min)_N5-20	TARA_070_SRF_5-20	Trades Biome	[SAO] South Atlantic Ocean	[SATL] South Atlantic Gyral Province (MRGID:21459)	[SRF] surface water layer (ENVO:00010504)	2010-09-21T12:02	-20,4107	-3,1775	5,40	2010-09-22	11:56	19,78	36,38	215,65	0,17	0,32	0,36	554,71	440,22	0,99	793	0,04	https://ws.pangaea.de/dds-fdp/rest/panquery?datasetDOI=doi.pangaea.de/10.1594/PANGAEA.853810&filterParameterValue=1,TARA_N000000682	https://ws.pangaea.de/dds-fdp/rest/panquery?datasetDOI=doi.pangaea.de/10.1594/PANGAEA.858201&filterParameterValue=1,TARA_N000000682	https://ws.pangaea.de/dds-fdp/rest/panquery?datasetDOI=doi.pangaea.de/10.1594/PANGAEA.858207&filterParameterValue=1,TARA_N000000682	https://ws.pangaea.de/dds-fdp/rest/panquery?datasetDOI=doi.pangaea.de/10.1594/PANGAEA.842197&filterParameterValue=1,TARA_N000000682
TARA_N000000833	TARA_072	SEQ-(100L-or-15min)_W0.8-5	TARA_072_DCM_0.8-5	Trades Biome	[SAO] South Atlantic Ocean	[SATL] South Atlantic Gyral Province (MRGID:21459)	[DCM] deep chlorophyll maximum layer (ENVO:01000326)	2010-10-05T15:35	-8,7296	-17,9604	100,38	2010-10-05	14:34	23,70	36,68	194,81	0,18	0,36	0,14	395,65	441,92	0,04	940	0,21	https://ws.pangaea.de/dds-fdp/rest/panquery?datasetDOI=doi.pangaea.de/10.1594/PANGAEA.853810&filterParameterValue=1,TARA_N000000833	https://ws.pangaea.de/dds-fdp/rest/panquery?datasetDOI=doi.pangaea.de/10.1594/PANGAEA.858201&filterParameterValue=1,TARA_N000000833	https://ws.pangaea.de/dds-fdp/rest/panquery?datasetDOI=doi.pangaea.de/10.1594/PANGAEA.858207&filterParameterValue=1,TARA_N000000833	https://ws.pangaea.de/dds-fdp/rest/panquery?datasetDOI=doi.pangaea.de/10.1594/PANGAEA.842197&filterParameterValue=1,TARA_N000000833
TARA_N000000845	TARA_072	SEQ-(500mL-or-15min)_N180-2000	TARA_072_DCM_180-2000	Trades Biome	[SAO] South Atlantic Ocean	[SATL] South Atlantic Gyral Province (MRGID:21459)	[DCM] deep chlorophyll maximum layer (ENVO:01000326)	2010-10-05T14:06	-8757	-17,9245	100,38	2010-10-05	13:05	23,70	36,68	194,81	0,18	0,36	0,14	395,65	441,92	0,04	940	0,21	https://ws.pangaea.de/dds-fdp/rest/panquery?datasetDOI=doi.pangaea.de/10.1594/PANGAEA.853810&filterParameterValue=1,TARA_N000000845	https://ws.pangaea.de/dds-fdp/rest/panquery?datasetDOI=doi.pangaea.de/10.1594/PANGAEA.858201&filterParameterValue=1,TARA_N000000845	https://ws.pangaea.de/dds-fdp/rest/panquery?datasetDOI=doi.pangaea.de/10.1594/PANGAEA.858207&filterParameterValue=1,TARA_N000000845	https://ws.pangaea.de/dds-fdp/rest/panquery?datasetDOI=doi.pangaea.de/10.1594/PANGAEA.842197&filterParameterValue=1,TARA_N000000845
TARA_N000000841	TARA_072	SEQ-(500mL-or-15min)_N20-180	TARA_072_DCM_20-180	Trades Biome	[SAO] South Atlantic Ocean	[SATL] South Atlantic Gyral Province (MRGID:21459)	[DCM] deep chlorophyll maximum layer (ENVO:01000326)	2010-10-05T17:45	-8,6996	-17,9926	100,38	2010-10-05	16:44	23,70	36,68	194,81	0,18	0,36	0,14	395,65	441,92	0,04	940	0,21	https://ws.pangaea.de/dds-fdp/rest/panquery?datasetDOI=doi.pangaea.de/10.1594/PANGAEA.853810&filterParameterValue=1,TARA_N000000841	https://ws.pangaea.de/dds-fdp/rest/panquery?datasetDOI=doi.pangaea.de/10.1594/PANGAEA.858201&filterParameterValue=1,TARA_N000000841	https://ws.pangaea.de/dds-fdp/rest/panquery?datasetDOI=doi.pangaea.de/10.1594/PANGAEA.858207&filterParameterValue=1,TARA_N000000841	https://ws.pangaea.de/dds-fdp/rest/panquery?datasetDOI=doi.pangaea.de/10.1594/PANGAEA.842197&filterParameterValue=1,TARA_N000000841
TARA_N000000837	TARA_072	SEQ-(500mL-or-15min)_N5-20	TARA_072_DCM_5-20	Trades Biome	[SAO] South Atlantic Ocean	[SATL] South Atlantic Gyral Province (MRGID:21459)	[DCM] deep chlorophyll maximum layer (ENVO:01000326)	2010-10-05T18:28	-8,6831	-18,0095	100,38	2010-10-05	17:27	23,70	36,68	194,81	0,18	0,36	0,14	395,65	441,92	0,04	940	0,21	https://ws.pangaea.de/dds-fdp/rest/panquery?datasetDOI=doi.pangaea.de/10.1594/PANGAEA.853810&filterParameterValue=1,TARA_N000000837	https://ws.pangaea.de/dds-fdp/rest/panquery?datasetDOI=doi.pangaea.de/10.1594/PANGAEA.858201&filterParameterValue=1,TARA_N000000837	https://ws.pangaea.de/dds-fdp/rest/panquery?datasetDOI=doi.pangaea.de/10.1594/PANGAEA.858207&filterParameterValue=1,TARA_N000000837	https://ws.pangaea.de/dds-fdp/rest/panquery?datasetDOI=doi.pangaea.de/10.1594/PANGAEA.842197&filterParameterValue=1,TARA_N000000837
TARA_N000000843	TARA_072	SEQ-(500mL-or-15min)_N180-2000	TARA_072_SRF_180-2000	Trades Biome	[SAO] South Atlantic Ocean	[SATL] South Atlantic Gyral Province (MRGID:21459)	[SRF] surface water layer (ENVO:00010504)	2010-10-05T08:20	-8,7726	-17915	5,84	2010-10-06	07:19	25,03	36,42	199,12	0,26	0,05	0,10	395,65	380,70	0,02	1258	0,02	https://ws.pangaea.de/dds-fdp/rest/panquery?datasetDOI=doi.pangaea.de/10.1594/PANGAEA.853810&filterParameterValue=1,TARA_N000000843	https://ws.pangaea.de/dds-fdp/rest/panquery?datasetDOI=doi.pangaea.de/10.1594/PANGAEA.858201&filterParameterValue=1,TARA_N000000843	https://ws.pangaea.de/dds-fdp/rest/panquery?datasetDOI=doi.pangaea.de/10.1594/PANGAEA.858207&filterParameterValue=1,TARA_N000000843	https://ws.pangaea.de/dds-fdp/rest/panquery?datasetDOI=doi.pangaea.de/10.1594/PANGAEA.842197&filterParameterValue=1,TARA_N000000843
TARA_N000000839	TARA_072	SEQ-(500mL-or-15min)_N20-180	TARA_072_SRF_20-180	Trades Biome	[SAO] South Atlantic Ocean	[SATL] South Atlantic Gyral Province (MRGID:21459)	[SRF] surface water layer (ENVO:00010504)	2010-10-05T09:48	-8,7484	-17,9179	5,84	2010-10-06	08:47	25,03	36,42	199,12	0,26	0,05	0,10	395,65	380,70	0,02	1258	0,02	https://ws.pangaea.de/dds-fdp/rest/panquery?datasetDOI=doi.pangaea.de/10.1594/PANGAEA.853810&filterParameterValue=1,TARA_N000000839	https://ws.pangaea.de/dds-fdp/rest/panquery?datasetDOI=doi.pangaea.de/10.1594/PANGAEA.858201&filterParameterValue=1,TARA_N000000839	https://ws.pangaea.de/dds-fdp/rest/panquery?datasetDOI=doi.pangaea.de/10.1594/PANGAEA.858207&filterParameterValue=1,TARA_N000000839	https://ws.pangaea.de/dds-fdp/rest/panquery?datasetDOI=doi.pangaea.de/10.1594/PANGAEA.842197&filterParameterValue=1,TARA_N000000839
TARA_N000000835	TARA_072	SEQ-(500mL-or-15min)_N5-20	TARA_072_SRF_5-20	Trades Biome	[SAO] South Atlantic Ocean	[SATL] South Atlantic Gyral Province (MRGID:21459)	[SRF] surface water layer (ENVO:00010504)	2010-10-05T11:00	-8,7277	-17,9235	5,84	2010-10-06	09:59	25,03	36,42	199,12	0,26	0,05	0,10	395,65	380,70	0,02	1258	0,02	https://ws.pangaea.de/dds-fdp/rest/panquery?datasetDOI=doi.pangaea.de/10.1594/PANGAEA.853810&filterParameterValue=1,TARA_N000000835	https://ws.pangaea.de/dds-fdp/rest/panquery?datasetDOI=doi.pangaea.de/10.1594/PANGAEA.858201&filterParameterValue=1,TARA_N000000835	https://ws.pangaea.de/dds-fdp/rest/panquery?datasetDOI=doi.pangaea.de/10.1594/PANGAEA.858207&filterParameterValue=1,TARA_N000000835	https://ws.pangaea.de/dds-fdp/rest/panquery?datasetDOI=doi.pangaea.de/10.1594/PANGAEA.842197&filterParameterValue=1,TARA_N000000835
TARA_N000000836	TARA_072	SEQ-(500mL-or-15min)_N5-20	TARA_072_SRF_5-20	Trades Biome	[SAO] South Atlantic Ocean	[SATL] South Atlantic Gyral Province (MRGID:21459)	[SRF] surface water layer (ENVO:00010504)	2010-10-05T11:00	-8,7277	-17,9235	5,84	2010-10-06	09:59	25,03	36,42	199,12	0,26	0,05	0,10	395,65	380,70	0,02	1258	0,02	https://ws.pangaea.de/dds-fdp/rest/panquery?datasetDOI=doi.pangaea.de/10.1594/PANGAEA.853810&filterParameterValue=1,TARA_N000000836	https://ws.pangaea.de/dds-fdp/rest/panquery?datasetDOI=doi.pangaea.de/10.1594/PANGAEA.858201&filterParameterValue=1,TARA_N000000836	https://ws.pangaea.de/dds-fdp/rest/panquery?datasetDOI=doi.pangaea.de/10.1594/PANGAEA.858207&filterParameterValue=1,TARA_N000000836	https://ws.pangaea.de/dds-fdp/rest/panquery?datasetDOI=doi.pangaea.de/10.1594/PANGAEA.842197&filterParameterValue=1,TARA_N000000836
TARA_N000000884	TARA_076	SEQ-(500mL-or-15min)_N180-2000	TARA_076_DCM_180-2000	Trades Biome	[SAO] South Atlantic Ocean	[SATL] South Atlantic Gyral Province (MRGID:21459)	[DCM] deep chlorophyll maximum layer (ENVO:01000326)	2010-10-16T15:54	-21004	-35,3168	107,34	2010-10-16	13:47	22,52	36,95	205,31	0,06	0,09	0,05	31,87	262,56	0,00	723	0,20	https://ws.pangaea.de/dds-fdp/rest/panquery?datasetDOI=doi.pangaea.de/10.1594/PANGAEA.853810&filterParameterValue=1,TARA_N000000884	https://ws.pangaea.de/dds-fdp/rest/panquery?datasetDOI=doi.pangaea.de/10.1594/PANGAEA.858201&filterParameterValue=1,TARA_N000000884	https://ws.pangaea.de/dds-fdp/rest/panquery?datasetDOI=doi.pangaea.de/10.1594/PANGAEA.858207&filterParameterValue=1,TARA_N000000884	https://ws.pangaea.de/dds-fdp/rest/panquery?datasetDOI=doi.pangaea.de/10.1594/PANGAEA.842197&filterParameterValue=1,TARA_N000000884
TARA_N000000876	TARA_076	SEQ-(500mL-or-15min)_N20-180	TARA_076_DCM_20-180	Trades Biome	[SAO] South Atlantic Ocean	[SATL] South Atlantic Gyral Province (MRGID:21459)	[DCM] deep chlorophyll maximum layer (ENVO:01000326)	2010-10-16T18:54	-21,0716	-35,3964	107,34	2010-10-16	16:46	22,52	36,95	205,31	0,06	0,09	0,05	31,87	262,56	0,00	723	0,20	https://ws.pangaea.de/dds-fdp/rest/panquery?datasetDOI=doi.pangaea.de/10.1594/PANGAEA.853810&filterParameterValue=1,TARA_N000000876	https://ws.pangaea.de/dds-fdp/rest/panquery?datasetDOI=doi.pangaea.de/10.1594/PANGAEA.858201&filterParameterValue=1,TARA_N000000876	https://ws.pangaea.de/dds-fdp/rest/panquery?datasetDOI=doi.pangaea.de/10.1594/PANGAEA.858207&filterParameterValue=1,TARA_N000000876	https://ws.pangaea.de/dds-fdp/rest/panquery?datasetDOI=doi.pangaea.de/10.1594/PANGAEA.842197&filterParameterValue=1,TARA_N000000876
TARA_N000000868	TARA_076	SEQ-(500mL-or-15min)_N5-20	TARA_076_DCM_5-20	Trades Biome	[SAO] South Atlantic Ocean	[SATL] South Atlantic Gyral Province (MRGID:21459)	[DCM] deep chlorophyll maximum layer (ENVO:01000326)	2010-10-16T19:53	-21092	-35417	107,34	2010-10-16	17:45	22,52	36,95	205,31	0,06	0,09	0,05	31,87	262,56	0,00	723	0,20	https://ws.pangaea.de/dds-fdp/rest/panquery?datasetDOI=doi.pangaea.de/10.1594/PANGAEA.853810&filterParameterValue=1,TARA_N000000868	https://ws.pangaea.de/dds-fdp/rest/panquery?datasetDOI=doi.pangaea.de/10.1594/PANGAEA.858201&filterParameterValue=1,TARA_N000000868	https://ws.pangaea.de/dds-fdp/rest/panquery?datasetDOI=doi.pangaea.de/10.1594/PANGAEA.858207&filterParameterValue=1,TARA_N000000868	https://ws.pangaea.de/dds-fdp/rest/panquery?datasetDOI=doi.pangaea.de/10.1594/PANGAEA.842197&filterParameterValue=1,TARA_N000000868
TARA_N000000852	TARA_076	SEQ-(100L-or-15min)_W>0.8	TARA_076_SRF_0.8-2000	Trades Biome	[SAO] South Atlantic Ocean	[SATL] South Atlantic Gyral Province (MRGID:21459)	[SRF] surface water layer (ENVO:00010504)	2010-10-16T09:55	-20,9354	-35,1803	5,46	2010-10-17	07:48	23,35	37,10	206,19	0,03	0,03	0,06	31,87	237,38	0,00	777	0,16	https://ws.pangaea.de/dds-fdp/rest/panquery?datasetDOI=doi.pangaea.de/10.1594/PANGAEA.853810&filterParameterValue=1,TARA_N000000852	https://ws.pangaea.de/dds-fdp/rest/panquery?datasetDOI=doi.pangaea.de/10.1594/PANGAEA.858201&filterParameterValue=1,TARA_N000000852	https://ws.pangaea.de/dds-fdp/rest/panquery?datasetDOI=doi.pangaea.de/10.1594/PANGAEA.858207&filterParameterValue=1,TARA_N000000852	https://ws.pangaea.de/dds-fdp/rest/panquery?datasetDOI=doi.pangaea.de/10.1594/PANGAEA.842197&filterParameterValue=1,TARA_N000000852
TARA_N000000879	TARA_076	SEQ-(500mL-or-15min)_N180-2000	TARA_076_SRF_180-2000	Trades Biome	[SAO] South Atlantic Ocean	[SATL] South Atlantic Gyral Province (MRGID:21459)	[SRF] surface water layer (ENVO:00010504)	2010-10-16T10:16	-20,9406	-35196	5,46	2010-10-17	08:09	23,35	37,10	206,19	0,03	0,03	0,06	31,87	237,38	0,00	777	0,16	https://ws.pangaea.de/dds-fdp/rest/panquery?datasetDOI=doi.pangaea.de/10.1594/PANGAEA.853810&filterParameterValue=1,TARA_N000000879	https://ws.pangaea.de/dds-fdp/rest/panquery?datasetDOI=doi.pangaea.de/10.1594/PANGAEA.858201&filterParameterValue=1,TARA_N000000879	https://ws.pangaea.de/dds-fdp/rest/panquery?datasetDOI=doi.pangaea.de/10.1594/PANGAEA.858207&filterParameterValue=1,TARA_N000000879	https://ws.pangaea.de/dds-fdp/rest/panquery?datasetDOI=doi.pangaea.de/10.1594/PANGAEA.842197&filterParameterValue=1,TARA_N000000879
TARA_N000000871	TARA_076	SEQ-(500mL-or-15min)_N20-180	TARA_076_SRF_20-180	Trades Biome	[SAO] South Atlantic Ocean	[SATL] South Atlantic Gyral Province (MRGID:21459)	[SRF] surface water layer (ENVO:00010504)	2010-10-16T11:18	-20,9514	-35,2273	5,46	2010-10-17	09:11	23,35	37,10	206,19	0,03	0,03	0,06	31,87	237,38	0,00	777	0,16	https://ws.pangaea.de/dds-fdp/rest/panquery?datasetDOI=doi.pangaea.de/10.1594/PANGAEA.853810&filterParameterValue=1,TARA_N000000871	https://ws.pangaea.de/dds-fdp/rest/panquery?datasetDOI=doi.pangaea.de/10.1594/PANGAEA.858201&filterParameterValue=1,TARA_N000000871	https://ws.pangaea.de/dds-fdp/rest/panquery?datasetDOI=doi.pangaea.de/10.1594/PANGAEA.858207&filterParameterValue=1,TARA_N000000871	https://ws.pangaea.de/dds-fdp/rest/panquery?datasetDOI=doi.pangaea.de/10.1594/PANGAEA.842197&filterParameterValue=1,TARA_N000000871
TARA_N000000863	TARA_076	SEQ-(500mL-or-15min)_N5-20	TARA_076_SRF_5-20	Trades Biome	[SAO] South Atlantic Ocean	[SATL] South Atlantic Gyral Province (MRGID:21459)	[SRF] surface water layer (ENVO:00010504)	2010-10-16T12:45	-20,9724	-35,2724	5,46	2010-10-17	10:38	23,35	37,10	206,19	0,03	0,03	0,06	31,87	237,38	0,00	777	0,16	https://ws.pangaea.de/dds-fdp/rest/panquery?datasetDOI=doi.pangaea.de/10.1594/PANGAEA.853810&filterParameterValue=1,TARA_N000000863	https://ws.pangaea.de/dds-fdp/rest/panquery?datasetDOI=doi.pangaea.de/10.1594/PANGAEA.858201&filterParameterValue=1,TARA_N000000863	https://ws.pangaea.de/dds-fdp/rest/panquery?datasetDOI=doi.pangaea.de/10.1594/PANGAEA.858207&filterParameterValue=1,TARA_N000000863	https://ws.pangaea.de/dds-fdp/rest/panquery?datasetDOI=doi.pangaea.de/10.1594/PANGAEA.842197&filterParameterValue=1,TARA_N000000863
TARA_N000000864	TARA_076	SEQ-(500mL-or-15min)_N5-20	TARA_076_SRF_5-20	Trades Biome	[SAO] South Atlantic Ocean	[SATL] South Atlantic Gyral Province (MRGID:21459)	[SRF] surface water layer (ENVO:00010504)	2010-10-16T12:45	-20,9724	-35,2724	5,46	2010-10-17	10:38	23,35	37,10	206,19	0,03	0,03	0,06	31,87	237,38	0,00	777	0,16	https://ws.pangaea.de/dds-fdp/rest/panquery?datasetDOI=doi.pangaea.de/10.1594/PANGAEA.853810&filterParameterValue=1,TARA_N000000864	https://ws.pangaea.de/dds-fdp/rest/panquery?datasetDOI=doi.pangaea.de/10.1594/PANGAEA.858201&filterParameterValue=1,TARA_N000000864	https://ws.pangaea.de/dds-fdp/rest/panquery?datasetDOI=doi.pangaea.de/10.1594/PANGAEA.858207&filterParameterValue=1,TARA_N000000864	https://ws.pangaea.de/dds-fdp/rest/panquery?datasetDOI=doi.pangaea.de/10.1594/PANGAEA.842197&filterParameterValue=1,TARA_N000000864
TARA_N000000618	TARA_078	SEQ-(100L-or-15min)_W>0.8	TARA_078_DCM_0.8-2000	Trades Biome	[SAO] South Atlantic Ocean	[SATL] South Atlantic Gyral Province (MRGID:21459)	[DCM] deep chlorophyll maximum layer (ENVO:01000326)	2010-11-04T18:16:53	-30,1484	-43,2705	78,50	2010-11-04	15:39	19,66	36,32	221,29	-0,04	0,15	0,00	563,41	422,49	0,10	836	0,07	https://ws.pangaea.de/dds-fdp/rest/panquery?datasetDOI=doi.pangaea.de/10.1594/PANGAEA.853810&filterParameterValue=1,TARA_N000000618	https://ws.pangaea.de/dds-fdp/rest/panquery?datasetDOI=doi.pangaea.de/10.1594/PANGAEA.858201&filterParameterValue=1,TARA_N000000618	https://ws.pangaea.de/dds-fdp/rest/panquery?datasetDOI=doi.pangaea.de/10.1594/PANGAEA.858207&filterParameterValue=1,TARA_N000000618	https://ws.pangaea.de/dds-fdp/rest/panquery?datasetDOI=doi.pangaea.de/10.1594/PANGAEA.842197&filterParameterValue=1,TARA_N000000618
TARA_N000001516	TARA_078	SEQ-(500mL-or-15min)_N180-2000	TARA_078_DCM_180-2000	Trades Biome	[SAO] South Atlantic Ocean	[SATL] South Atlantic Gyral Province (MRGID:21459)	[DCM] deep chlorophyll maximum layer (ENVO:01000326)	2010-11-04T18:37	-30052	-43,2619	78,50	2010-11-04	16:00	19,66	36,32	221,29	-0,04	0,15	0,00	563,41	422,49	0,10	836	0,07	https://ws.pangaea.de/dds-fdp/rest/panquery?datasetDOI=doi.pangaea.de/10.1594/PANGAEA.853810&filterParameterValue=1,TARA_N000001516	https://ws.pangaea.de/dds-fdp/rest/panquery?datasetDOI=doi.pangaea.de/10.1594/PANGAEA.858201&filterParameterValue=1,TARA_N000001516	https://ws.pangaea.de/dds-fdp/rest/panquery?datasetDOI=doi.pangaea.de/10.1594/PANGAEA.858207&filterParameterValue=1,TARA_N000001516	https://ws.pangaea.de/dds-fdp/rest/panquery?datasetDOI=doi.pangaea.de/10.1594/PANGAEA.842197&filterParameterValue=1,TARA_N000001516
TARA_N000001512	TARA_078	SEQ-(500mL-or-15min)_N20-180	TARA_078_DCM_20-180	Trades Biome	[SAO] South Atlantic Ocean	[SATL] South Atlantic Gyral Province (MRGID:21459)	[DCM] deep chlorophyll maximum layer (ENVO:01000326)	2010-11-04T20:13	-30,1403	-43,2641	78,50	2010-11-04	17:36	19,66	36,32	221,29	-0,04	0,15	0,00	563,41	422,49	0,10	836	0,07	https://ws.pangaea.de/dds-fdp/rest/panquery?datasetDOI=doi.pangaea.de/10.1594/PANGAEA.853810&filterParameterValue=1,TARA_N000001512	https://ws.pangaea.de/dds-fdp/rest/panquery?datasetDOI=doi.pangaea.de/10.1594/PANGAEA.858201&filterParameterValue=1,TARA_N000001512	https://ws.pangaea.de/dds-fdp/rest/panquery?datasetDOI=doi.pangaea.de/10.1594/PANGAEA.858207&filterParameterValue=1,TARA_N000001512	https://ws.pangaea.de/dds-fdp/rest/panquery?datasetDOI=doi.pangaea.de/10.1594/PANGAEA.842197&filterParameterValue=1,TARA_N000001512
TARA_N000000616	TARA_078	SEQ-(100L-or-15min)_W>0.8	TARA_078_SRF_0.8-2000	Trades Biome	[SAO] South Atlantic Ocean	[SATL] South Atlantic Gyral Province (MRGID:21459)	[SRF] surface water layer (ENVO:00010504)	2010-11-04T10:24	-30,1367	-43,2899	5,57	2010-11-05	07:47	19,85	36,32	221,47	-0,39	0,05	0,00	563,41	422,49	0,02	864	0,11	https://ws.pangaea.de/dds-fdp/rest/panquery?datasetDOI=doi.pangaea.de/10.1594/PANGAEA.853810&filterParameterValue=1,TARA_N000000616	https://ws.pangaea.de/dds-fdp/rest/panquery?datasetDOI=doi.pangaea.de/10.1594/PANGAEA.858201&filterParameterValue=1,TARA_N000000616	https://ws.pangaea.de/dds-fdp/rest/panquery?datasetDOI=doi.pangaea.de/10.1594/PANGAEA.858207&filterParameterValue=1,TARA_N000000616	https://ws.pangaea.de/dds-fdp/rest/panquery?datasetDOI=doi.pangaea.de/10.1594/PANGAEA.842197&filterParameterValue=1,TARA_N000000616
TARA_N000001514	TARA_078	SEQ-(500mL-or-15min)_N180-2000	TARA_078_SRF_180-2000	Trades Biome	[SAO] South Atlantic Ocean	[SATL] South Atlantic Gyral Province (MRGID:21459)	[SRF] surface water layer (ENVO:00010504)	2010-11-04T11:31	-30,1506	-43,2877	5,57	2010-11-05	08:54	19,85	36,32	221,47	-0,39	0,05	0,00	563,41	422,49	0,02	864	0,11	https://ws.pangaea.de/dds-fdp/rest/panquery?datasetDOI=doi.pangaea.de/10.1594/PANGAEA.853810&filterParameterValue=1,TARA_N000001514	https://ws.pangaea.de/dds-fdp/rest/panquery?datasetDOI=doi.pangaea.de/10.1594/PANGAEA.858201&filterParameterValue=1,TARA_N000001514	https://ws.pangaea.de/dds-fdp/rest/panquery?datasetDOI=doi.pangaea.de/10.1594/PANGAEA.858207&filterParameterValue=1,TARA_N000001514	https://ws.pangaea.de/dds-fdp/rest/panquery?datasetDOI=doi.pangaea.de/10.1594/PANGAEA.842197&filterParameterValue=1,TARA_N000001514
TARA_N000001510	TARA_078	SEQ-(500mL-or-15min)_N20-180	TARA_078_SRF_20-180	Trades Biome	[SAO] South Atlantic Ocean	[SATL] South Atlantic Gyral Province (MRGID:21459)	[SRF] surface water layer (ENVO:00010504)	2010-11-04T13:22	-30,1872	-43,2834	5,57	2010-11-05	10:45	19,85	36,32	221,47	-0,39	0,05	0,00	563,41	422,49	0,02	864	0,11	https://ws.pangaea.de/dds-fdp/rest/panquery?datasetDOI=doi.pangaea.de/10.1594/PANGAEA.853810&filterParameterValue=1,TARA_N000001510	https://ws.pangaea.de/dds-fdp/rest/panquery?datasetDOI=doi.pangaea.de/10.1594/PANGAEA.858201&filterParameterValue=1,TARA_N000001510	https://ws.pangaea.de/dds-fdp/rest/panquery?datasetDOI=doi.pangaea.de/10.1594/PANGAEA.858207&filterParameterValue=1,TARA_N000001510	https://ws.pangaea.de/dds-fdp/rest/panquery?datasetDOI=doi.pangaea.de/10.1594/PANGAEA.842197&filterParameterValue=1,TARA_N000001510
TARA_N000000625	TARA_078	SEQ-(500mL-or-15min)_N5-20	TARA_078_SRF_5-20	Trades Biome	[SAO] South Atlantic Ocean	[SATL] South Atlantic Gyral Province (MRGID:21459)	[SRF] surface water layer (ENVO:00010504)	2010-11-04T14:24	-30,2163	-43275	5,57	2010-11-05	11:47	19,85	36,32	221,47	-0,39	0,05	0,00	563,41	422,49	0,02	864	0,11	https://ws.pangaea.de/dds-fdp/rest/panquery?datasetDOI=doi.pangaea.de/10.1594/PANGAEA.853810&filterParameterValue=1,TARA_N000000625	https://ws.pangaea.de/dds-fdp/rest/panquery?datasetDOI=doi.pangaea.de/10.1594/PANGAEA.858201&filterParameterValue=1,TARA_N000000625	https://ws.pangaea.de/dds-fdp/rest/panquery?datasetDOI=doi.pangaea.de/10.1594/PANGAEA.858207&filterParameterValue=1,TARA_N000000625	https://ws.pangaea.de/dds-fdp/rest/panquery?datasetDOI=doi.pangaea.de/10.1594/PANGAEA.842197&filterParameterValue=1,TARA_N000000625
TARA_N000001485	TARA_080	SEQ-(100L-or-15min)_W0.8-5	TARA_080_DCM_0.8-5	Coastal Biome	[SAO] South Atlantic Ocean	[BRAZ] Brazil Current Coastal Province (MRGID:21468)	[DCM] deep chlorophyll maximum layer (ENVO:01000326)	2010-11-29T19:37:13	-40,6241	-51,9229	82,53	2010-11-29	16:20	18,25	35,88	208,36	-0,16	0,36	0,36	555,87	NA	3,50	653	0,48	https://ws.pangaea.de/dds-fdp/rest/panquery?datasetDOI=doi.pangaea.de/10.1594/PANGAEA.853810&filterParameterValue=1,TARA_N000001485	https://ws.pangaea.de/dds-fdp/rest/panquery?datasetDOI=doi.pangaea.de/10.1594/PANGAEA.858201&filterParameterValue=1,TARA_N000001485	https://ws.pangaea.de/dds-fdp/rest/panquery?datasetDOI=doi.pangaea.de/10.1594/PANGAEA.858207&filterParameterValue=1,TARA_N000001485	https://ws.pangaea.de/dds-fdp/rest/panquery?datasetDOI=doi.pangaea.de/10.1594/PANGAEA.842197&filterParameterValue=1,TARA_N000001485
TARA_N000001477	TARA_080	SEQ-(500mL-or-15min)_N180-2000	TARA_080_DCM_180-2000	Coastal Biome	[SAO] South Atlantic Ocean	[BRAZ] Brazil Current Coastal Province (MRGID:21468)	[DCM] deep chlorophyll maximum layer (ENVO:01000326)	2010-11-29T18:09	-40,6083	-51,9557	82,53	2010-11-29	14:52	18,25	35,88	208,36	-0,16	0,36	0,36	555,87	NA	3,50	653	0,48	https://ws.pangaea.de/dds-fdp/rest/panquery?datasetDOI=doi.pangaea.de/10.1594/PANGAEA.853810&filterParameterValue=1,TARA_N000001477	https://ws.pangaea.de/dds-fdp/rest/panquery?datasetDOI=doi.pangaea.de/10.1594/PANGAEA.858201&filterParameterValue=1,TARA_N000001477	https://ws.pangaea.de/dds-fdp/rest/panquery?datasetDOI=doi.pangaea.de/10.1594/PANGAEA.858207&filterParameterValue=1,TARA_N000001477	https://ws.pangaea.de/dds-fdp/rest/panquery?datasetDOI=doi.pangaea.de/10.1594/PANGAEA.842197&filterParameterValue=1,TARA_N000001477
TARA_N000001473	TARA_080	SEQ-(500mL-or-15min)_N20-180	TARA_080_DCM_20-180	Coastal Biome	[SAO] South Atlantic Ocean	[BRAZ] Brazil Current Coastal Province (MRGID:21468)	[DCM] deep chlorophyll maximum layer (ENVO:01000326)	2010-11-29T19:06	-40,6154	-51,9351	82,53	2010-11-29	15:49	18,25	35,88	208,36	-0,16	0,36	0,36	555,87	NA	3,50	653	0,48	https://ws.pangaea.de/dds-fdp/rest/panquery?datasetDOI=doi.pangaea.de/10.1594/PANGAEA.853810&filterParameterValue=1,TARA_N000001473	https://ws.pangaea.de/dds-fdp/rest/panquery?datasetDOI=doi.pangaea.de/10.1594/PANGAEA.858201&filterParameterValue=1,TARA_N000001473	https://ws.pangaea.de/dds-fdp/rest/panquery?datasetDOI=doi.pangaea.de/10.1594/PANGAEA.858207&filterParameterValue=1,TARA_N000001473	https://ws.pangaea.de/dds-fdp/rest/panquery?datasetDOI=doi.pangaea.de/10.1594/PANGAEA.842197&filterParameterValue=1,TARA_N000001473
TARA_N000001489	TARA_080	SEQ-(500mL-or-15min)_W5-20	TARA_080_DCM_5-20	Coastal Biome	[SAO] South Atlantic Ocean	[BRAZ] Brazil Current Coastal Province (MRGID:21468)	[DCM] deep chlorophyll maximum layer (ENVO:01000326)	2010-11-29T19:37:13	-40,6241	-51,9229	82,53	2010-11-29	16:20	18,25	35,88	208,36	-0,16	0,36	0,36	555,87	NA	3,50	653	0,48	https://ws.pangaea.de/dds-fdp/rest/panquery?datasetDOI=doi.pangaea.de/10.1594/PANGAEA.853810&filterParameterValue=1,TARA_N000001489	https://ws.pangaea.de/dds-fdp/rest/panquery?datasetDOI=doi.pangaea.de/10.1594/PANGAEA.858201&filterParameterValue=1,TARA_N000001489	https://ws.pangaea.de/dds-fdp/rest/panquery?datasetDOI=doi.pangaea.de/10.1594/PANGAEA.858207&filterParameterValue=1,TARA_N000001489	https://ws.pangaea.de/dds-fdp/rest/panquery?datasetDOI=doi.pangaea.de/10.1594/PANGAEA.842197&filterParameterValue=1,TARA_N000001489
TARA_N000001478	TARA_080	SEQ-(100L-or-15min)_W>0.8	TARA_080_SRF_0.8-2000	Coastal Biome	[SAO] South Atlantic Ocean	[BRAZ] Brazil Current Coastal Province (MRGID:21468)	[SRF] surface water layer (ENVO:00010504)	2010-11-29T11:21	-40,6511	-52182	5,46	2010-11-30	08:04	19,31	35,61	228,46	-1,56	0,25	0,00	555,87	NA	0,05	1226	0,79	https://ws.pangaea.de/dds-fdp/rest/panquery?datasetDOI=doi.pangaea.de/10.1594/PANGAEA.853810&filterParameterValue=1,TARA_N000001478	https://ws.pangaea.de/dds-fdp/rest/panquery?datasetDOI=doi.pangaea.de/10.1594/PANGAEA.858201&filterParameterValue=1,TARA_N000001478	https://ws.pangaea.de/dds-fdp/rest/panquery?datasetDOI=doi.pangaea.de/10.1594/PANGAEA.858207&filterParameterValue=1,TARA_N000001478	https://ws.pangaea.de/dds-fdp/rest/panquery?datasetDOI=doi.pangaea.de/10.1594/PANGAEA.842197&filterParameterValue=1,TARA_N000001478
TARA_N000001491	TARA_080	SEQ-(100L-or-15min)_W0.8-5	TARA_080_SRF_0.8-5	Coastal Biome	[SAO] South Atlantic Ocean	[BRAZ] Brazil Current Coastal Province (MRGID:21468)	[SRF] surface water layer (ENVO:00010504)	2010-11-29T11:21	-40,6511	-52182	5,46	2010-11-30	08:04	19,31	35,61	228,46	-1,56	0,25	0,00	555,87	NA	0,05	1226	0,79	https://ws.pangaea.de/dds-fdp/rest/panquery?datasetDOI=doi.pangaea.de/10.1594/PANGAEA.853810&filterParameterValue=1,TARA_N000001491	https://ws.pangaea.de/dds-fdp/rest/panquery?datasetDOI=doi.pangaea.de/10.1594/PANGAEA.858201&filterParameterValue=1,TARA_N000001491	https://ws.pangaea.de/dds-fdp/rest/panquery?datasetDOI=doi.pangaea.de/10.1594/PANGAEA.858207&filterParameterValue=1,TARA_N000001491	https://ws.pangaea.de/dds-fdp/rest/panquery?datasetDOI=doi.pangaea.de/10.1594/PANGAEA.842197&filterParameterValue=1,TARA_N000001491
TARA_N000001503	TARA_080	SEQ-(500mL-or-15min)_N180-2000	TARA_080_SRF_180-2000	Coastal Biome	[SAO] South Atlantic Ocean	[BRAZ] Brazil Current Coastal Province (MRGID:21468)	[SRF] surface water layer (ENVO:00010504)	2010-11-29T12:04	-40,6487	-52,1511	5,46	2010-11-30	08:47	19,31	35,61	228,46	-1,56	0,25	0,00	555,87	NA	0,05	1226	0,79	https://ws.pangaea.de/dds-fdp/rest/panquery?datasetDOI=doi.pangaea.de/10.1594/PANGAEA.853810&filterParameterValue=1,TARA_N000001503	https://ws.pangaea.de/dds-fdp/rest/panquery?datasetDOI=doi.pangaea.de/10.1594/PANGAEA.858201&filterParameterValue=1,TARA_N000001503	https://ws.pangaea.de/dds-fdp/rest/panquery?datasetDOI=doi.pangaea.de/10.1594/PANGAEA.858207&filterParameterValue=1,TARA_N000001503	https://ws.pangaea.de/dds-fdp/rest/panquery?datasetDOI=doi.pangaea.de/10.1594/PANGAEA.842197&filterParameterValue=1,TARA_N000001503
TARA_N000001499	TARA_080	SEQ-(500mL-or-15min)_N20-180	TARA_080_SRF_20-180	Coastal Biome	[SAO] South Atlantic Ocean	[BRAZ] Brazil Current Coastal Province (MRGID:21468)	[SRF] surface water layer (ENVO:00010504)	2010-11-29T14:30	-40,6297	-52,0503	5,46	2010-11-30	11:13	19,31	35,61	228,46	-1,56	0,25	0,00	555,87	NA	0,05	1226	0,79	https://ws.pangaea.de/dds-fdp/rest/panquery?datasetDOI=doi.pangaea.de/10.1594/PANGAEA.853810&filterParameterValue=1,TARA_N000001499	https://ws.pangaea.de/dds-fdp/rest/panquery?datasetDOI=doi.pangaea.de/10.1594/PANGAEA.858201&filterParameterValue=1,TARA_N000001499	https://ws.pangaea.de/dds-fdp/rest/panquery?datasetDOI=doi.pangaea.de/10.1594/PANGAEA.858207&filterParameterValue=1,TARA_N000001499	https://ws.pangaea.de/dds-fdp/rest/panquery?datasetDOI=doi.pangaea.de/10.1594/PANGAEA.842197&filterParameterValue=1,TARA_N000001499
TARA_N000001424	TARA_081	SEQ-(500mL-or-15min)_N180-2000	TARA_081_DCM_180-2000	Westerlies Biome	[SAO] South Atlantic Ocean	[SSTC] South Subtropical Convergence Province (MRGID:21500)	[DCM] deep chlorophyll maximum layer (ENVO:01000326)	2010-12-02T13:44	-44,5455	-52,3242	31,79	2010-12-03	10:25	13,38	34,72	257,68	3,41	0,47	0,41	830,60	NA	3,36	625	0,55	https://ws.pangaea.de/dds-fdp/rest/panquery?datasetDOI=doi.pangaea.de/10.1594/PANGAEA.853810&filterParameterValue=1,TARA_N000001424	https://ws.pangaea.de/dds-fdp/rest/panquery?datasetDOI=doi.pangaea.de/10.1594/PANGAEA.858201&filterParameterValue=1,TARA_N000001424	https://ws.pangaea.de/dds-fdp/rest/panquery?datasetDOI=doi.pangaea.de/10.1594/PANGAEA.858207&filterParameterValue=1,TARA_N000001424	https://ws.pangaea.de/dds-fdp/rest/panquery?datasetDOI=doi.pangaea.de/10.1594/PANGAEA.842197&filterParameterValue=1,TARA_N000001424
TARA_N000001426	TARA_081	SEQ-(500mL-or-15min)_N20-180	TARA_081_DCM_20-180	Westerlies Biome	[SAO] South Atlantic Ocean	[SSTC] South Subtropical Convergence Province (MRGID:21500)	[DCM] deep chlorophyll maximum layer (ENVO:01000326)	2010-12-02T15:22	-44,5582	-52,2718	31,79	2010-12-02	12:03	13,38	34,72	257,68	3,41	0,47	0,41	830,60	NA	3,36	625	0,55	https://ws.pangaea.de/dds-fdp/rest/panquery?datasetDOI=doi.pangaea.de/10.1594/PANGAEA.853810&filterParameterValue=1,TARA_N000001426	https://ws.pangaea.de/dds-fdp/rest/panquery?datasetDOI=doi.pangaea.de/10.1594/PANGAEA.858201&filterParameterValue=1,TARA_N000001426	https://ws.pangaea.de/dds-fdp/rest/panquery?datasetDOI=doi.pangaea.de/10.1594/PANGAEA.858207&filterParameterValue=1,TARA_N000001426	https://ws.pangaea.de/dds-fdp/rest/panquery?datasetDOI=doi.pangaea.de/10.1594/PANGAEA.842197&filterParameterValue=1,TARA_N000001426
TARA_N000001430	TARA_081	SEQ-(500mL-or-15min)_N5-20	TARA_081_DCM_5-20	Westerlies Biome	[SAO] South Atlantic Ocean	[SSTC] South Subtropical Convergence Province (MRGID:21500)	[DCM] deep chlorophyll maximum layer (ENVO:01000326)	2010-12-02T18:14	-44,5838	-52,1952	31,79	2010-12-02	14:55	13,38	34,72	257,68	3,41	0,47	0,41	830,60	NA	3,36	625	0,55	https://ws.pangaea.de/dds-fdp/rest/panquery?datasetDOI=doi.pangaea.de/10.1594/PANGAEA.853810&filterParameterValue=1,TARA_N000001430	https://ws.pangaea.de/dds-fdp/rest/panquery?datasetDOI=doi.pangaea.de/10.1594/PANGAEA.858201&filterParameterValue=1,TARA_N000001430	https://ws.pangaea.de/dds-fdp/rest/panquery?datasetDOI=doi.pangaea.de/10.1594/PANGAEA.858207&filterParameterValue=1,TARA_N000001430	https://ws.pangaea.de/dds-fdp/rest/panquery?datasetDOI=doi.pangaea.de/10.1594/PANGAEA.842197&filterParameterValue=1,TARA_N000001430
TARA_N000001436	TARA_081	SEQ-(100L-or-15min)_W0.8-5	TARA_081_SRF_0.8-5	Westerlies Biome	[SAO] South Atlantic Ocean	[SSTC] South Subtropical Convergence Province (MRGID:21500)	[SRF] surface water layer (ENVO:00010504)	2010-12-02T10:28	-44,5342	-52455	5,49	2010-12-03	07:08	13,49	34,69	257,79	3,15	0,18	0,43	830,60	NA	3,08	1085	0,69	https://ws.pangaea.de/dds-fdp/rest/panquery?datasetDOI=doi.pangaea.de/10.1594/PANGAEA.853810&filterParameterValue=1,TARA_N000001436	https://ws.pangaea.de/dds-fdp/rest/panquery?datasetDOI=doi.pangaea.de/10.1594/PANGAEA.858201&filterParameterValue=1,TARA_N000001436	https://ws.pangaea.de/dds-fdp/rest/panquery?datasetDOI=doi.pangaea.de/10.1594/PANGAEA.858207&filterParameterValue=1,TARA_N000001436	https://ws.pangaea.de/dds-fdp/rest/panquery?datasetDOI=doi.pangaea.de/10.1594/PANGAEA.842197&filterParameterValue=1,TARA_N000001436
TARA_N000001428	TARA_081	SEQ-(500mL-or-15min)_N20-180	TARA_081_SRF_20-180	Westerlies Biome	[SAO] South Atlantic Ocean	[SSTC] South Subtropical Convergence Province (MRGID:21500)	[SRF] surface water layer (ENVO:00010504)	2010-12-02T20:42	-44,6241	-52,1505	5,49	2010-12-02	17:23	13,49	34,69	257,79	3,15	0,18	0,43	830,60	NA	3,08	1085	0,69	https://ws.pangaea.de/dds-fdp/rest/panquery?datasetDOI=doi.pangaea.de/10.1594/PANGAEA.853810&filterParameterValue=1,TARA_N000001428	https://ws.pangaea.de/dds-fdp/rest/panquery?datasetDOI=doi.pangaea.de/10.1594/PANGAEA.858201&filterParameterValue=1,TARA_N000001428	https://ws.pangaea.de/dds-fdp/rest/panquery?datasetDOI=doi.pangaea.de/10.1594/PANGAEA.858207&filterParameterValue=1,TARA_N000001428	https://ws.pangaea.de/dds-fdp/rest/panquery?datasetDOI=doi.pangaea.de/10.1594/PANGAEA.842197&filterParameterValue=1,TARA_N000001428
TARA_N000001384	TARA_082	SEQ-(100L-or-15min)_W>0.8	TARA_082_DCM_0.8-2000	Coastal Biome	[SO] Southern Ocean	[FKLD] Southwest Atlantic Shelves Province (MRGID:21469)	[DCM] deep chlorophyll maximum layer (ENVO:01000326)	2010-12-06T18:58	-47,2007	-57,9446	28,83	2010-12-06	15:15	7,05	34,06	307,50	17,12	0,79	1,30	459,61	666,72	19,07	233	0,86	https://ws.pangaea.de/dds-fdp/rest/panquery?datasetDOI=doi.pangaea.de/10.1594/PANGAEA.853810&filterParameterValue=1,TARA_N000001384	https://ws.pangaea.de/dds-fdp/rest/panquery?datasetDOI=doi.pangaea.de/10.1594/PANGAEA.858201&filterParameterValue=1,TARA_N000001384	https://ws.pangaea.de/dds-fdp/rest/panquery?datasetDOI=doi.pangaea.de/10.1594/PANGAEA.858207&filterParameterValue=1,TARA_N000001384	https://ws.pangaea.de/dds-fdp/rest/panquery?datasetDOI=doi.pangaea.de/10.1594/PANGAEA.842197&filterParameterValue=1,TARA_N000001384
TARA_N000001400	TARA_082	SEQ-(500mL-or-15min)_N180-2000	TARA_082_DCM_180-2000	Coastal Biome	[SO] Southern Ocean	[FKLD] Southwest Atlantic Shelves Province (MRGID:21469)	[DCM] deep chlorophyll maximum layer (ENVO:01000326)	2010-12-06T17:20	-47,2116	-58,0266	28,83	2010-12-06	13:36	7,05	34,06	307,50	17,12	0,79	1,30	459,61	666,72	19,07	233	0,86	https://ws.pangaea.de/dds-fdp/rest/panquery?datasetDOI=doi.pangaea.de/10.1594/PANGAEA.853810&filterParameterValue=1,TARA_N000001400	https://ws.pangaea.de/dds-fdp/rest/panquery?datasetDOI=doi.pangaea.de/10.1594/PANGAEA.858201&filterParameterValue=1,TARA_N000001400	https://ws.pangaea.de/dds-fdp/rest/panquery?datasetDOI=doi.pangaea.de/10.1594/PANGAEA.858207&filterParameterValue=1,TARA_N000001400	https://ws.pangaea.de/dds-fdp/rest/panquery?datasetDOI=doi.pangaea.de/10.1594/PANGAEA.842197&filterParameterValue=1,TARA_N000001400
TARA_N000001396	TARA_082	SEQ-(500mL-or-15min)_N20-180	TARA_082_DCM_20-180	Coastal Biome	[SO] Southern Ocean	[FKLD] Southwest Atlantic Shelves Province (MRGID:21469)	[DCM] deep chlorophyll maximum layer (ENVO:01000326)	2010-12-06T18:58	-47,2007	-57,9446	28,83	2010-12-06	15:15	7,05	34,06	307,50	17,12	0,79	1,30	459,61	666,72	19,07	233	0,86	https://ws.pangaea.de/dds-fdp/rest/panquery?datasetDOI=doi.pangaea.de/10.1594/PANGAEA.853810&filterParameterValue=1,TARA_N000001396	https://ws.pangaea.de/dds-fdp/rest/panquery?datasetDOI=doi.pangaea.de/10.1594/PANGAEA.858201&filterParameterValue=1,TARA_N000001396	https://ws.pangaea.de/dds-fdp/rest/panquery?datasetDOI=doi.pangaea.de/10.1594/PANGAEA.858207&filterParameterValue=1,TARA_N000001396	https://ws.pangaea.de/dds-fdp/rest/panquery?datasetDOI=doi.pangaea.de/10.1594/PANGAEA.842197&filterParameterValue=1,TARA_N000001396
TARA_N000001382	TARA_082	SEQ-(100L-or-15min)_W>0.8	TARA_082_SRF_0.8-2000	Coastal Biome	[SO] Southern Ocean	[FKLD] Southwest Atlantic Shelves Province (MRGID:21469)	[SRF] surface water layer (ENVO:00010504)	2010-12-06T10:33	-47,1863	-58,2902	5,48	2010-12-07	06:48	7,32	34,05	305,01	17,09	0,31	1,30	459,61	643,80	18,15	308	0,82	https://ws.pangaea.de/dds-fdp/rest/panquery?datasetDOI=doi.pangaea.de/10.1594/PANGAEA.853810&filterParameterValue=1,TARA_N000001382	https://ws.pangaea.de/dds-fdp/rest/panquery?datasetDOI=doi.pangaea.de/10.1594/PANGAEA.858201&filterParameterValue=1,TARA_N000001382	https://ws.pangaea.de/dds-fdp/rest/panquery?datasetDOI=doi.pangaea.de/10.1594/PANGAEA.858207&filterParameterValue=1,TARA_N000001382	https://ws.pangaea.de/dds-fdp/rest/panquery?datasetDOI=doi.pangaea.de/10.1594/PANGAEA.842197&filterParameterValue=1,TARA_N000001382
TARA_N000001386	TARA_082	SEQ-(100L-or-15min)_W0.8-5	TARA_082_SRF_0.8-5	Coastal Biome	[SO] Southern Ocean	[FKLD] Southwest Atlantic Shelves Province (MRGID:21469)	[SRF] surface water layer (ENVO:00010504)	2010-12-06T10:33	-47,1863	-58,2902	5,48	2010-12-07	06:48	7,32	34,05	305,01	17,09	0,31	1,30	459,61	643,80	18,15	308	0,82	https://ws.pangaea.de/dds-fdp/rest/panquery?datasetDOI=doi.pangaea.de/10.1594/PANGAEA.853810&filterParameterValue=1,TARA_N000001386	https://ws.pangaea.de/dds-fdp/rest/panquery?datasetDOI=doi.pangaea.de/10.1594/PANGAEA.858201&filterParameterValue=1,TARA_N000001386	https://ws.pangaea.de/dds-fdp/rest/panquery?datasetDOI=doi.pangaea.de/10.1594/PANGAEA.858207&filterParameterValue=1,TARA_N000001386	https://ws.pangaea.de/dds-fdp/rest/panquery?datasetDOI=doi.pangaea.de/10.1594/PANGAEA.842197&filterParameterValue=1,TARA_N000001386
TARA_N000001398	TARA_082	SEQ-(500mL-or-15min)_N180-2000	TARA_082_SRF_180-2000	Coastal Biome	[SO] Southern Ocean	[FKLD] Southwest Atlantic Shelves Province (MRGID:21469)	[SRF] surface water layer (ENVO:00010504)	2010-12-06T11:34	-47,1899	-58,2724	5,48	2010-12-07	07:49	7,32	34,05	305,01	17,09	0,31	1,30	459,61	643,80	18,15	308	0,82	https://ws.pangaea.de/dds-fdp/rest/panquery?datasetDOI=doi.pangaea.de/10.1594/PANGAEA.853810&filterParameterValue=1,TARA_N000001398	https://ws.pangaea.de/dds-fdp/rest/panquery?datasetDOI=doi.pangaea.de/10.1594/PANGAEA.858201&filterParameterValue=1,TARA_N000001398	https://ws.pangaea.de/dds-fdp/rest/panquery?datasetDOI=doi.pangaea.de/10.1594/PANGAEA.858207&filterParameterValue=1,TARA_N000001398	https://ws.pangaea.de/dds-fdp/rest/panquery?datasetDOI=doi.pangaea.de/10.1594/PANGAEA.842197&filterParameterValue=1,TARA_N000001398
TARA_N000001394	TARA_082	SEQ-(500mL-or-15min)_N20-180	TARA_082_SRF_20-180	Coastal Biome	[SO] Southern Ocean	[FKLD] Southwest Atlantic Shelves Province (MRGID:21469)	[SRF] surface water layer (ENVO:00010504)	2010-12-06T12:32	-47,1966	-58,2349	5,48	2010-12-07	08:48	7,32	34,05	305,01	17,09	0,31	1,30	459,61	643,80	18,15	308	0,82	https://ws.pangaea.de/dds-fdp/rest/panquery?datasetDOI=doi.pangaea.de/10.1594/PANGAEA.853810&filterParameterValue=1,TARA_N000001394	https://ws.pangaea.de/dds-fdp/rest/panquery?datasetDOI=doi.pangaea.de/10.1594/PANGAEA.858201&filterParameterValue=1,TARA_N000001394	https://ws.pangaea.de/dds-fdp/rest/panquery?datasetDOI=doi.pangaea.de/10.1594/PANGAEA.858207&filterParameterValue=1,TARA_N000001394	https://ws.pangaea.de/dds-fdp/rest/panquery?datasetDOI=doi.pangaea.de/10.1594/PANGAEA.842197&filterParameterValue=1,TARA_N000001394
TARA_N000001390	TARA_082	SEQ-(500mL-or-15min)_N5-20	TARA_082_SRF_5-20	Coastal Biome	[SO] Southern Ocean	[FKLD] Southwest Atlantic Shelves Province (MRGID:21469)	[SRF] surface water layer (ENVO:00010504)	2010-12-06T13:23	-47,2002	-58,2034	5,48	2010-12-07	09:39	7,32	34,05	305,01	17,09	0,31	1,30	459,61	643,80	18,15	308	0,82	https://ws.pangaea.de/dds-fdp/rest/panquery?datasetDOI=doi.pangaea.de/10.1594/PANGAEA.853810&filterParameterValue=1,TARA_N000001390	https://ws.pangaea.de/dds-fdp/rest/panquery?datasetDOI=doi.pangaea.de/10.1594/PANGAEA.858201&filterParameterValue=1,TARA_N000001390	https://ws.pangaea.de/dds-fdp/rest/panquery?datasetDOI=doi.pangaea.de/10.1594/PANGAEA.858207&filterParameterValue=1,TARA_N000001390	https://ws.pangaea.de/dds-fdp/rest/panquery?datasetDOI=doi.pangaea.de/10.1594/PANGAEA.842197&filterParameterValue=1,TARA_N000001390
TARA_N000001372	TARA_083	SEQ-(100L-or-15min)_W>0.8	TARA_083_SRF_0.8-2000	Coastal Biome	[SO] Southern Ocean	[FKLD] Southwest Atlantic Shelves Province (MRGID:21469)	[SRF] surface water layer (ENVO:00010504)	2010-12-16T11:58	-54,3739	-65,1342	5,42	2010-12-17	07:41	7,35	32,95	293,31	11,00	0,25	1,18	27,27	NA	10,86	25	0,80	https://ws.pangaea.de/dds-fdp/rest/panquery?datasetDOI=doi.pangaea.de/10.1594/PANGAEA.853810&filterParameterValue=1,TARA_N000001372	https://ws.pangaea.de/dds-fdp/rest/panquery?datasetDOI=doi.pangaea.de/10.1594/PANGAEA.858201&filterParameterValue=1,TARA_N000001372	https://ws.pangaea.de/dds-fdp/rest/panquery?datasetDOI=doi.pangaea.de/10.1594/PANGAEA.858207&filterParameterValue=1,TARA_N000001372	https://ws.pangaea.de/dds-fdp/rest/panquery?datasetDOI=doi.pangaea.de/10.1594/PANGAEA.842197&filterParameterValue=1,TARA_N000001372
TARA_N000001374	TARA_083	SEQ-(100L-or-15min)_W0.8-5	TARA_083_SRF_0.8-5	Coastal Biome	[SO] Southern Ocean	[FKLD] Southwest Atlantic Shelves Province (MRGID:21469)	[SRF] surface water layer (ENVO:00010504)	2010-12-16T11:58	-54,3739	-65,1342	5,42	2010-12-17	07:41	7,35	32,95	293,31	11,00	0,25	1,18	27,27	NA	10,86	25	0,80	https://ws.pangaea.de/dds-fdp/rest/panquery?datasetDOI=doi.pangaea.de/10.1594/PANGAEA.853810&filterParameterValue=1,TARA_N000001374	https://ws.pangaea.de/dds-fdp/rest/panquery?datasetDOI=doi.pangaea.de/10.1594/PANGAEA.858201&filterParameterValue=1,TARA_N000001374	https://ws.pangaea.de/dds-fdp/rest/panquery?datasetDOI=doi.pangaea.de/10.1594/PANGAEA.858207&filterParameterValue=1,TARA_N000001374	https://ws.pangaea.de/dds-fdp/rest/panquery?datasetDOI=doi.pangaea.de/10.1594/PANGAEA.842197&filterParameterValue=1,TARA_N000001374
TARA_N000001380	TARA_083	SEQ-(500mL-or-15min)_N180-2000	TARA_083_SRF_180-2000	Coastal Biome	[SO] Southern Ocean	[FKLD] Southwest Atlantic Shelves Province (MRGID:21469)	[SRF] surface water layer (ENVO:00010504)	2010-12-16T13:08	-54,3826	-65051	5,42	2010-12-17	08:52	7,35	32,95	293,31	11,00	0,25	1,18	27,27	NA	10,86	25	0,80	https://ws.pangaea.de/dds-fdp/rest/panquery?datasetDOI=doi.pangaea.de/10.1594/PANGAEA.853810&filterParameterValue=1,TARA_N000001380	https://ws.pangaea.de/dds-fdp/rest/panquery?datasetDOI=doi.pangaea.de/10.1594/PANGAEA.858201&filterParameterValue=1,TARA_N000001380	https://ws.pangaea.de/dds-fdp/rest/panquery?datasetDOI=doi.pangaea.de/10.1594/PANGAEA.858207&filterParameterValue=1,TARA_N000001380	https://ws.pangaea.de/dds-fdp/rest/panquery?datasetDOI=doi.pangaea.de/10.1594/PANGAEA.842197&filterParameterValue=1,TARA_N000001380
TARA_N000001376	TARA_083	SEQ-(500mL-or-15min)_W5-20	TARA_083_SRF_5-20	Coastal Biome	[SO] Southern Ocean	[FKLD] Southwest Atlantic Shelves Province (MRGID:21469)	[SRF] surface water layer (ENVO:00010504)	2010-12-16T11:58	-54,3739	-65,1342	5,42	2010-12-17	07:41	7,35	32,95	293,31	11,00	0,25	1,18	27,27	NA	10,86	25	0,80	https://ws.pangaea.de/dds-fdp/rest/panquery?datasetDOI=doi.pangaea.de/10.1594/PANGAEA.853810&filterParameterValue=1,TARA_N000001376	https://ws.pangaea.de/dds-fdp/rest/panquery?datasetDOI=doi.pangaea.de/10.1594/PANGAEA.858201&filterParameterValue=1,TARA_N000001376	https://ws.pangaea.de/dds-fdp/rest/panquery?datasetDOI=doi.pangaea.de/10.1594/PANGAEA.858207&filterParameterValue=1,TARA_N000001376	https://ws.pangaea.de/dds-fdp/rest/panquery?datasetDOI=doi.pangaea.de/10.1594/PANGAEA.842197&filterParameterValue=1,TARA_N000001376
TARA_N000001377	TARA_083	SEQ-(500mL-or-15min)_W5-20	TARA_083_SRF_5-20	Coastal Biome	[SO] Southern Ocean	[FKLD] Southwest Atlantic Shelves Province (MRGID:21469)	[SRF] surface water layer (ENVO:00010504)	2010-12-16T11:58	-54,3739	-65,1342	5,42	2010-12-17	07:41	7,35	32,95	293,31	11,00	0,25	1,18	27,27	NA	10,86	25	0,80	https://ws.pangaea.de/dds-fdp/rest/panquery?datasetDOI=doi.pangaea.de/10.1594/PANGAEA.853810&filterParameterValue=1,TARA_N000001377	https://ws.pangaea.de/dds-fdp/rest/panquery?datasetDOI=doi.pangaea.de/10.1594/PANGAEA.858201&filterParameterValue=1,TARA_N000001377	https://ws.pangaea.de/dds-fdp/rest/panquery?datasetDOI=doi.pangaea.de/10.1594/PANGAEA.858207&filterParameterValue=1,TARA_N000001377	https://ws.pangaea.de/dds-fdp/rest/panquery?datasetDOI=doi.pangaea.de/10.1594/PANGAEA.842197&filterParameterValue=1,TARA_N000001377
TARA_N000001006	TARA_084	SEQ-(100L-or-15min)_W>0.8	TARA_084_SRF_0.8-2000	Polar Biome	[SO] Southern Ocean	[ANTA] Antarctic Province (MRGID:21502)	[SRF] surface water layer (ENVO:00010504)	2011-01-03T11:05	-60,2287	-60,6476	5,90	2011-01-04	06:58	1,84	33,72	338,30	24,42	0,11	1,72	211,82	168,23	25,30	9	0,49	https://ws.pangaea.de/dds-fdp/rest/panquery?datasetDOI=doi.pangaea.de/10.1594/PANGAEA.853810&filterParameterValue=1,TARA_N000001006	https://ws.pangaea.de/dds-fdp/rest/panquery?datasetDOI=doi.pangaea.de/10.1594/PANGAEA.858201&filterParameterValue=1,TARA_N000001006	https://ws.pangaea.de/dds-fdp/rest/panquery?datasetDOI=doi.pangaea.de/10.1594/PANGAEA.858207&filterParameterValue=1,TARA_N000001006	https://ws.pangaea.de/dds-fdp/rest/panquery?datasetDOI=doi.pangaea.de/10.1594/PANGAEA.842197&filterParameterValue=1,TARA_N000001006
TARA_N000001438	TARA_084	SEQ-(100L-or-15min)_W0.8-5	TARA_084_SRF_0.8-5	Polar Biome	[SO] Southern Ocean	[ANTA] Antarctic Province (MRGID:21502)	[SRF] surface water layer (ENVO:00010504)	2011-01-03T11:05	-60,2287	-60,6476	5,90	2011-01-04	06:58	1,84	33,72	338,30	24,42	0,11	1,72	211,82	168,23	25,30	9	0,49	https://ws.pangaea.de/dds-fdp/rest/panquery?datasetDOI=doi.pangaea.de/10.1594/PANGAEA.853810&filterParameterValue=1,TARA_N000001438	https://ws.pangaea.de/dds-fdp/rest/panquery?datasetDOI=doi.pangaea.de/10.1594/PANGAEA.858201&filterParameterValue=1,TARA_N000001438	https://ws.pangaea.de/dds-fdp/rest/panquery?datasetDOI=doi.pangaea.de/10.1594/PANGAEA.858207&filterParameterValue=1,TARA_N000001438	https://ws.pangaea.de/dds-fdp/rest/panquery?datasetDOI=doi.pangaea.de/10.1594/PANGAEA.842197&filterParameterValue=1,TARA_N000001438
TARA_N000001362	TARA_084	SEQ-(500mL-or-15min)_N180-2000	TARA_084_SRF_180-2000	Polar Biome	[SO] Southern Ocean	[ANTA] Antarctic Province (MRGID:21502)	[SRF] surface water layer (ENVO:00010504)	2011-01-03T12:17	-60,2584	-60,6226	5,90	2011-01-04	08:10	1,84	33,72	338,30	24,42	0,11	1,72	211,82	168,23	25,30	9	0,49	https://ws.pangaea.de/dds-fdp/rest/panquery?datasetDOI=doi.pangaea.de/10.1594/PANGAEA.853810&filterParameterValue=1,TARA_N000001362	https://ws.pangaea.de/dds-fdp/rest/panquery?datasetDOI=doi.pangaea.de/10.1594/PANGAEA.858201&filterParameterValue=1,TARA_N000001362	https://ws.pangaea.de/dds-fdp/rest/panquery?datasetDOI=doi.pangaea.de/10.1594/PANGAEA.858207&filterParameterValue=1,TARA_N000001362	https://ws.pangaea.de/dds-fdp/rest/panquery?datasetDOI=doi.pangaea.de/10.1594/PANGAEA.842197&filterParameterValue=1,TARA_N000001362
TARA_N000001442	TARA_084	SEQ-(500mL-or-15min)_N20-180	TARA_084_SRF_20-180	Polar Biome	[SO] Southern Ocean	[ANTA] Antarctic Province (MRGID:21502)	[SRF] surface water layer (ENVO:00010504)	2011-01-03T13:58	-60,3046	-60,5715	5,90	2011-01-04	09:51	1,84	33,72	338,30	24,42	0,11	1,72	211,82	168,23	25,30	9	0,49	https://ws.pangaea.de/dds-fdp/rest/panquery?datasetDOI=doi.pangaea.de/10.1594/PANGAEA.853810&filterParameterValue=1,TARA_N000001442	https://ws.pangaea.de/dds-fdp/rest/panquery?datasetDOI=doi.pangaea.de/10.1594/PANGAEA.858201&filterParameterValue=1,TARA_N000001442	https://ws.pangaea.de/dds-fdp/rest/panquery?datasetDOI=doi.pangaea.de/10.1594/PANGAEA.858207&filterParameterValue=1,TARA_N000001442	https://ws.pangaea.de/dds-fdp/rest/panquery?datasetDOI=doi.pangaea.de/10.1594/PANGAEA.842197&filterParameterValue=1,TARA_N000001442
TARA_N000001440	TARA_084	SEQ-(500mL-or-15min)_N5-20	TARA_084_SRF_5-20	Polar Biome	[SO] Southern Ocean	[ANTA] Antarctic Province (MRGID:21502)	[SRF] surface water layer (ENVO:00010504)	2011-01-03T18:17	-60,4016	-60,4488	5,90	2011-01-03	14:10	1,84	33,72	338,30	24,42	0,11	1,72	211,82	168,23	25,30	9	0,49	https://ws.pangaea.de/dds-fdp/rest/panquery?datasetDOI=doi.pangaea.de/10.1594/PANGAEA.853810&filterParameterValue=1,TARA_N000001440	https://ws.pangaea.de/dds-fdp/rest/panquery?datasetDOI=doi.pangaea.de/10.1594/PANGAEA.858201&filterParameterValue=1,TARA_N000001440	https://ws.pangaea.de/dds-fdp/rest/panquery?datasetDOI=doi.pangaea.de/10.1594/PANGAEA.858207&filterParameterValue=1,TARA_N000001440	https://ws.pangaea.de/dds-fdp/rest/panquery?datasetDOI=doi.pangaea.de/10.1594/PANGAEA.842197&filterParameterValue=1,TARA_N000001440
TARA_N000001026	TARA_085	SEQ-(100L-or-15min)_W>0.8	TARA_085_DCM_0.8-2000	Polar Biome	[SO] Southern Ocean	[ANTA] Antarctic Province (MRGID:21502)	[DCM] deep chlorophyll maximum layer (ENVO:01000326)	2011-01-06T19:34:21	-62,2231	-49,2139	89,96	2011-01-06	16:11	-0,82	34,40	327,69	30,52	0,43	2,31	241,80	128,35	31,00	419	0,13	https://ws.pangaea.de/dds-fdp/rest/panquery?datasetDOI=doi.pangaea.de/10.1594/PANGAEA.853810&filterParameterValue=1,TARA_N000001026	https://ws.pangaea.de/dds-fdp/rest/panquery?datasetDOI=doi.pangaea.de/10.1594/PANGAEA.858201&filterParameterValue=1,TARA_N000001026	https://ws.pangaea.de/dds-fdp/rest/panquery?datasetDOI=doi.pangaea.de/10.1594/PANGAEA.858207&filterParameterValue=1,TARA_N000001026	https://ws.pangaea.de/dds-fdp/rest/panquery?datasetDOI=doi.pangaea.de/10.1594/PANGAEA.842197&filterParameterValue=1,TARA_N000001026
TARA_N000001030	TARA_085	SEQ-(100L-or-15min)_W0.8-5	TARA_085_DCM_0.8-5	Polar Biome	[SO] Southern Ocean	[ANTA] Antarctic Province (MRGID:21502)	[DCM] deep chlorophyll maximum layer (ENVO:01000326)	2011-01-06T19:34:21	-62,2231	-49,2139	89,96	2011-01-06	16:11	-0,82	34,40	327,69	30,52	0,43	2,31	241,80	128,35	31,00	419	0,13	https://ws.pangaea.de/dds-fdp/rest/panquery?datasetDOI=doi.pangaea.de/10.1594/PANGAEA.853810&filterParameterValue=1,TARA_N000001030	https://ws.pangaea.de/dds-fdp/rest/panquery?datasetDOI=doi.pangaea.de/10.1594/PANGAEA.858201&filterParameterValue=1,TARA_N000001030	https://ws.pangaea.de/dds-fdp/rest/panquery?datasetDOI=doi.pangaea.de/10.1594/PANGAEA.858207&filterParameterValue=1,TARA_N000001030	https://ws.pangaea.de/dds-fdp/rest/panquery?datasetDOI=doi.pangaea.de/10.1594/PANGAEA.842197&filterParameterValue=1,TARA_N000001030
TARA_N000001042	TARA_085	SEQ-(500mL-or-15min)_N180-2000	TARA_085_DCM_180-2000	Polar Biome	[SO] Southern Ocean	[ANTA] Antarctic Province (MRGID:21502)	[DCM] deep chlorophyll maximum layer (ENVO:01000326)	2011-01-06T17:58	-62,1943	-49,2502	89,96	2011-01-06	14:35	-0,82	34,40	327,69	30,52	0,43	2,31	241,80	128,35	31,00	419	0,13	https://ws.pangaea.de/dds-fdp/rest/panquery?datasetDOI=doi.pangaea.de/10.1594/PANGAEA.853810&filterParameterValue=1,TARA_N000001042	https://ws.pangaea.de/dds-fdp/rest/panquery?datasetDOI=doi.pangaea.de/10.1594/PANGAEA.858201&filterParameterValue=1,TARA_N000001042	https://ws.pangaea.de/dds-fdp/rest/panquery?datasetDOI=doi.pangaea.de/10.1594/PANGAEA.858207&filterParameterValue=1,TARA_N000001042	https://ws.pangaea.de/dds-fdp/rest/panquery?datasetDOI=doi.pangaea.de/10.1594/PANGAEA.842197&filterParameterValue=1,TARA_N000001042
TARA_N000001019	TARA_085	SEQ-(500mL-or-15min)_N20-180	TARA_085_DCM_20-180	Polar Biome	[SO] Southern Ocean	[ANTA] Antarctic Province (MRGID:21502)	[DCM] deep chlorophyll maximum layer (ENVO:01000326)	2011-01-06T18:25	-62,2024	-49,2382	89,96	2011-01-06	15:02	-0,82	34,40	327,69	30,52	0,43	2,31	241,80	128,35	31,00	419	0,13	https://ws.pangaea.de/dds-fdp/rest/panquery?datasetDOI=doi.pangaea.de/10.1594/PANGAEA.853810&filterParameterValue=1,TARA_N000001019	https://ws.pangaea.de/dds-fdp/rest/panquery?datasetDOI=doi.pangaea.de/10.1594/PANGAEA.858201&filterParameterValue=1,TARA_N000001019	https://ws.pangaea.de/dds-fdp/rest/panquery?datasetDOI=doi.pangaea.de/10.1594/PANGAEA.858207&filterParameterValue=1,TARA_N000001019	https://ws.pangaea.de/dds-fdp/rest/panquery?datasetDOI=doi.pangaea.de/10.1594/PANGAEA.842197&filterParameterValue=1,TARA_N000001019
TARA_N000001034	TARA_085	SEQ-(500mL-or-15min)_N5-20	TARA_085_DCM_5-20	Polar Biome	[SO] Southern Ocean	[ANTA] Antarctic Province (MRGID:21502)	[DCM] deep chlorophyll maximum layer (ENVO:01000326)	2011-01-06T18:57	-62,21	-49,2245	89,96	2011-01-06	15:34	-0,82	34,40	327,69	30,52	0,43	2,31	241,80	128,35	31,00	419	0,13	https://ws.pangaea.de/dds-fdp/rest/panquery?datasetDOI=doi.pangaea.de/10.1594/PANGAEA.853810&filterParameterValue=1,TARA_N000001034	https://ws.pangaea.de/dds-fdp/rest/panquery?datasetDOI=doi.pangaea.de/10.1594/PANGAEA.858201&filterParameterValue=1,TARA_N000001034	https://ws.pangaea.de/dds-fdp/rest/panquery?datasetDOI=doi.pangaea.de/10.1594/PANGAEA.858207&filterParameterValue=1,TARA_N000001034	https://ws.pangaea.de/dds-fdp/rest/panquery?datasetDOI=doi.pangaea.de/10.1594/PANGAEA.842197&filterParameterValue=1,TARA_N000001034
TARA_N000001024	TARA_085	SEQ-(100L-or-15min)_W>0.8	TARA_085_SRF_0.8-2000	Polar Biome	[SO] Southern Ocean	[ANTA] Antarctic Province (MRGID:21502)	[SRF] surface water layer (ENVO:00010504)	2011-01-06T10:38	-62,0385	-49529	5,94	2011-01-07	07:14	0,67	34,35	343,44	27,50	0,07	2,11	241,80	138,95	28,50	455	0,51	https://ws.pangaea.de/dds-fdp/rest/panquery?datasetDOI=doi.pangaea.de/10.1594/PANGAEA.853810&filterParameterValue=1,TARA_N000001024	https://ws.pangaea.de/dds-fdp/rest/panquery?datasetDOI=doi.pangaea.de/10.1594/PANGAEA.858201&filterParameterValue=1,TARA_N000001024	https://ws.pangaea.de/dds-fdp/rest/panquery?datasetDOI=doi.pangaea.de/10.1594/PANGAEA.858207&filterParameterValue=1,TARA_N000001024	https://ws.pangaea.de/dds-fdp/rest/panquery?datasetDOI=doi.pangaea.de/10.1594/PANGAEA.842197&filterParameterValue=1,TARA_N000001024
TARA_N000001028	TARA_085	SEQ-(100L-or-15min)_W0.8-5	TARA_085_SRF_0.8-5	Polar Biome	[SO] Southern Ocean	[ANTA] Antarctic Province (MRGID:21502)	[SRF] surface water layer (ENVO:00010504)	2011-01-06T10:38	-62,0385	-49529	5,94	2011-01-07	07:14	0,67	34,35	343,44	27,50	0,07	2,11	241,80	138,95	28,50	455	0,51	https://ws.pangaea.de/dds-fdp/rest/panquery?datasetDOI=doi.pangaea.de/10.1594/PANGAEA.853810&filterParameterValue=1,TARA_N000001028	https://ws.pangaea.de/dds-fdp/rest/panquery?datasetDOI=doi.pangaea.de/10.1594/PANGAEA.858201&filterParameterValue=1,TARA_N000001028	https://ws.pangaea.de/dds-fdp/rest/panquery?datasetDOI=doi.pangaea.de/10.1594/PANGAEA.858207&filterParameterValue=1,TARA_N000001028	https://ws.pangaea.de/dds-fdp/rest/panquery?datasetDOI=doi.pangaea.de/10.1594/PANGAEA.842197&filterParameterValue=1,TARA_N000001028
TARA_N000001029	TARA_085	SEQ-(100L-or-15min)_W0.8-5	TARA_085_SRF_0.8-5	Polar Biome	[SO] Southern Ocean	[ANTA] Antarctic Province (MRGID:21502)	[SRF] surface water layer (ENVO:00010504)	2011-01-06T10:38	-62,0385	-49529	5,94	2011-01-07	07:14	0,67	34,35	343,44	27,50	0,07	2,11	241,80	138,95	28,50	455	0,51	https://ws.pangaea.de/dds-fdp/rest/panquery?datasetDOI=doi.pangaea.de/10.1594/PANGAEA.853810&filterParameterValue=1,TARA_N000001029	https://ws.pangaea.de/dds-fdp/rest/panquery?datasetDOI=doi.pangaea.de/10.1594/PANGAEA.858201&filterParameterValue=1,TARA_N000001029	https://ws.pangaea.de/dds-fdp/rest/panquery?datasetDOI=doi.pangaea.de/10.1594/PANGAEA.858207&filterParameterValue=1,TARA_N000001029	https://ws.pangaea.de/dds-fdp/rest/panquery?datasetDOI=doi.pangaea.de/10.1594/PANGAEA.842197&filterParameterValue=1,TARA_N000001029
TARA_N000001040	TARA_085	SEQ-(500mL-or-15min)_N180-2000	TARA_085_SRF_180-2000	Polar Biome	[SO] Southern Ocean	[ANTA] Antarctic Province (MRGID:21502)	[SRF] surface water layer (ENVO:00010504)	2011-01-06T12:45	-62,0773	-49,4534	5,94	2011-01-07	09:21	0,67	34,35	343,44	27,50	0,07	2,11	241,80	138,95	28,50	455	0,51	https://ws.pangaea.de/dds-fdp/rest/panquery?datasetDOI=doi.pangaea.de/10.1594/PANGAEA.853810&filterParameterValue=1,TARA_N000001040	https://ws.pangaea.de/dds-fdp/rest/panquery?datasetDOI=doi.pangaea.de/10.1594/PANGAEA.858201&filterParameterValue=1,TARA_N000001040	https://ws.pangaea.de/dds-fdp/rest/panquery?datasetDOI=doi.pangaea.de/10.1594/PANGAEA.858207&filterParameterValue=1,TARA_N000001040	https://ws.pangaea.de/dds-fdp/rest/panquery?datasetDOI=doi.pangaea.de/10.1594/PANGAEA.842197&filterParameterValue=1,TARA_N000001040
TARA_N000001017	TARA_085	SEQ-(500mL-or-15min)_N20-180	TARA_085_SRF_20-180	Polar Biome	[SO] Southern Ocean	[ANTA] Antarctic Province (MRGID:21502)	[SRF] surface water layer (ENVO:00010504)	2011-01-06T15:29	-62,14	-49,3273	5,94	2011-01-06	12:05	0,67	34,35	343,44	27,50	0,07	2,11	241,80	138,95	28,50	455	0,51	https://ws.pangaea.de/dds-fdp/rest/panquery?datasetDOI=doi.pangaea.de/10.1594/PANGAEA.853810&filterParameterValue=1,TARA_N000001017	https://ws.pangaea.de/dds-fdp/rest/panquery?datasetDOI=doi.pangaea.de/10.1594/PANGAEA.858201&filterParameterValue=1,TARA_N000001017	https://ws.pangaea.de/dds-fdp/rest/panquery?datasetDOI=doi.pangaea.de/10.1594/PANGAEA.858207&filterParameterValue=1,TARA_N000001017	https://ws.pangaea.de/dds-fdp/rest/panquery?datasetDOI=doi.pangaea.de/10.1594/PANGAEA.842197&filterParameterValue=1,TARA_N000001017
TARA_N000001309	TARA_092	SEQ-(100L-or-15min)_W>0.8	TARA_092_SRF_0.8-2000	Coastal Biome	[SPO] South Pacific Ocean	[CHIL] Chile-Peru Current Coastal Province (MRGID:21495)	[SRF] surface water layer (ENVO:00010504)	2011-02-26T12:01	-33,6895	-71998	5,39	2011-02-27	07:00	16,76	34,39	273,51	NA	NA	0,80	20,94	NA	0,11	5	0,45	https://ws.pangaea.de/dds-fdp/rest/panquery?datasetDOI=doi.pangaea.de/10.1594/PANGAEA.853810&filterParameterValue=1,TARA_N000001309	https://ws.pangaea.de/dds-fdp/rest/panquery?datasetDOI=doi.pangaea.de/10.1594/PANGAEA.858201&filterParameterValue=1,TARA_N000001309	https://ws.pangaea.de/dds-fdp/rest/panquery?datasetDOI=doi.pangaea.de/10.1594/PANGAEA.858207&filterParameterValue=1,TARA_N000001309	https://ws.pangaea.de/dds-fdp/rest/panquery?datasetDOI=doi.pangaea.de/10.1594/PANGAEA.842197&filterParameterValue=1,TARA_N000001309
TARA_N000001299	TARA_092	SEQ-(100L-or-15min)_W0.8-5	TARA_092_SRF_0.8-5	Coastal Biome	[SPO] South Pacific Ocean	[CHIL] Chile-Peru Current Coastal Province (MRGID:21495)	[SRF] surface water layer (ENVO:00010504)	2011-02-26T12:01	-33,6895	-71998	5,39	2011-02-27	07:00	16,76	34,39	273,51	NA	NA	0,80	20,94	NA	0,11	5	0,45	https://ws.pangaea.de/dds-fdp/rest/panquery?datasetDOI=doi.pangaea.de/10.1594/PANGAEA.853810&filterParameterValue=1,TARA_N000001299	https://ws.pangaea.de/dds-fdp/rest/panquery?datasetDOI=doi.pangaea.de/10.1594/PANGAEA.858201&filterParameterValue=1,TARA_N000001299	https://ws.pangaea.de/dds-fdp/rest/panquery?datasetDOI=doi.pangaea.de/10.1594/PANGAEA.858207&filterParameterValue=1,TARA_N000001299	https://ws.pangaea.de/dds-fdp/rest/panquery?datasetDOI=doi.pangaea.de/10.1594/PANGAEA.842197&filterParameterValue=1,TARA_N000001299
TARA_N000001305	TARA_092	SEQ-(500mL-or-15min)_N180-2000	TARA_092_SRF_180-2000	Coastal Biome	[SPO] South Pacific Ocean	[CHIL] Chile-Peru Current Coastal Province (MRGID:21495)	[SRF] surface water layer (ENVO:00010504)	2011-02-26T12:30	-33688	-71,9903	5,39	2011-02-27	07:29	16,76	34,39	273,51	NA	NA	0,80	20,94	NA	0,11	5	0,45	https://ws.pangaea.de/dds-fdp/rest/panquery?datasetDOI=doi.pangaea.de/10.1594/PANGAEA.853810&filterParameterValue=1,TARA_N000001305	https://ws.pangaea.de/dds-fdp/rest/panquery?datasetDOI=doi.pangaea.de/10.1594/PANGAEA.858201&filterParameterValue=1,TARA_N000001305	https://ws.pangaea.de/dds-fdp/rest/panquery?datasetDOI=doi.pangaea.de/10.1594/PANGAEA.858207&filterParameterValue=1,TARA_N000001305	https://ws.pangaea.de/dds-fdp/rest/panquery?datasetDOI=doi.pangaea.de/10.1594/PANGAEA.842197&filterParameterValue=1,TARA_N000001305
TARA_N000001303	TARA_092	SEQ-(500mL-or-15min)_N20-180	TARA_092_SRF_20-180	Coastal Biome	[SPO] South Pacific Ocean	[CHIL] Chile-Peru Current Coastal Province (MRGID:21495)	[SRF] surface water layer (ENVO:00010504)	2011-02-26T14:08	-33,6771	-71,9719	5,39	2011-02-27	09:07	16,76	34,39	273,51	NA	NA	0,80	20,94	NA	0,11	5	0,45	https://ws.pangaea.de/dds-fdp/rest/panquery?datasetDOI=doi.pangaea.de/10.1594/PANGAEA.853810&filterParameterValue=1,TARA_N000001303	https://ws.pangaea.de/dds-fdp/rest/panquery?datasetDOI=doi.pangaea.de/10.1594/PANGAEA.858201&filterParameterValue=1,TARA_N000001303	https://ws.pangaea.de/dds-fdp/rest/panquery?datasetDOI=doi.pangaea.de/10.1594/PANGAEA.858207&filterParameterValue=1,TARA_N000001303	https://ws.pangaea.de/dds-fdp/rest/panquery?datasetDOI=doi.pangaea.de/10.1594/PANGAEA.842197&filterParameterValue=1,TARA_N000001303
TARA_N000001301	TARA_092	SEQ-(500mL-or-15min)_N5-20	TARA_092_SRF_5-20	Coastal Biome	[SPO] South Pacific Ocean	[CHIL] Chile-Peru Current Coastal Province (MRGID:21495)	[SRF] surface water layer (ENVO:00010504)	2011-02-26T14:40	-33,6737	-71,9641	5,39	2011-02-27	09:39	16,76	34,39	273,51	NA	NA	0,80	20,94	NA	0,11	5	0,45	https://ws.pangaea.de/dds-fdp/rest/panquery?datasetDOI=doi.pangaea.de/10.1594/PANGAEA.853810&filterParameterValue=1,TARA_N000001301	https://ws.pangaea.de/dds-fdp/rest/panquery?datasetDOI=doi.pangaea.de/10.1594/PANGAEA.858201&filterParameterValue=1,TARA_N000001301	https://ws.pangaea.de/dds-fdp/rest/panquery?datasetDOI=doi.pangaea.de/10.1594/PANGAEA.858207&filterParameterValue=1,TARA_N000001301	https://ws.pangaea.de/dds-fdp/rest/panquery?datasetDOI=doi.pangaea.de/10.1594/PANGAEA.842197&filterParameterValue=1,TARA_N000001301
TARA_N000001111	TARA_093	SEQ-(100L-or-15min)_W0.8-5	TARA_093_DCM_0.8-5	Coastal Biome	[SPO] South Pacific Ocean	[CHIL] Chile-Peru Current Coastal Province (MRGID:21495)	[DCM] deep chlorophyll maximum layer (ENVO:01000326)	2011-03-12T19:36:38	-33,9116	-73,0537	21,86	2011-03-12	14:34	17,92	34,31	239,35	-1,13	0,50	0,60	98,39	1463,06	7,55	3	0,78	https://ws.pangaea.de/dds-fdp/rest/panquery?datasetDOI=doi.pangaea.de/10.1594/PANGAEA.853810&filterParameterValue=1,TARA_N000001111	https://ws.pangaea.de/dds-fdp/rest/panquery?datasetDOI=doi.pangaea.de/10.1594/PANGAEA.858201&filterParameterValue=1,TARA_N000001111	https://ws.pangaea.de/dds-fdp/rest/panquery?datasetDOI=doi.pangaea.de/10.1594/PANGAEA.858207&filterParameterValue=1,TARA_N000001111	https://ws.pangaea.de/dds-fdp/rest/panquery?datasetDOI=doi.pangaea.de/10.1594/PANGAEA.842197&filterParameterValue=1,TARA_N000001111
TARA_N000001123	TARA_093	SEQ-(500mL-or-15min)_N180-2000	TARA_093_DCM_180-2000	Coastal Biome	[SPO] South Pacific Ocean	[CHIL] Chile-Peru Current Coastal Province (MRGID:21495)	[DCM] deep chlorophyll maximum layer (ENVO:01000326)	2011-03-12T19:00	-33,9477	-73,0635	21,86	2011-03-12	13:57	17,92	34,31	239,35	-1,13	0,50	0,60	98,39	1463,06	7,55	3	0,78	https://ws.pangaea.de/dds-fdp/rest/panquery?datasetDOI=doi.pangaea.de/10.1594/PANGAEA.853810&filterParameterValue=1,TARA_N000001123	https://ws.pangaea.de/dds-fdp/rest/panquery?datasetDOI=doi.pangaea.de/10.1594/PANGAEA.858201&filterParameterValue=1,TARA_N000001123	https://ws.pangaea.de/dds-fdp/rest/panquery?datasetDOI=doi.pangaea.de/10.1594/PANGAEA.858207&filterParameterValue=1,TARA_N000001123	https://ws.pangaea.de/dds-fdp/rest/panquery?datasetDOI=doi.pangaea.de/10.1594/PANGAEA.842197&filterParameterValue=1,TARA_N000001123
TARA_N000001098	TARA_093	SEQ-(500mL-or-15min)_W5-20	TARA_093_DCM_5-20	Coastal Biome	[SPO] South Pacific Ocean	[CHIL] Chile-Peru Current Coastal Province (MRGID:21495)	[DCM] deep chlorophyll maximum layer (ENVO:01000326)	2011-03-12T19:36:38	-33,9116	-73,0537	21,86	2011-03-12	14:34	17,92	34,31	239,35	-1,13	0,50	0,60	98,39	1463,06	7,55	3	0,78	https://ws.pangaea.de/dds-fdp/rest/panquery?datasetDOI=doi.pangaea.de/10.1594/PANGAEA.853810&filterParameterValue=1,TARA_N000001098	https://ws.pangaea.de/dds-fdp/rest/panquery?datasetDOI=doi.pangaea.de/10.1594/PANGAEA.858201&filterParameterValue=1,TARA_N000001098	https://ws.pangaea.de/dds-fdp/rest/panquery?datasetDOI=doi.pangaea.de/10.1594/PANGAEA.858207&filterParameterValue=1,TARA_N000001098	https://ws.pangaea.de/dds-fdp/rest/panquery?datasetDOI=doi.pangaea.de/10.1594/PANGAEA.842197&filterParameterValue=1,TARA_N000001098
TARA_N000001115	TARA_093	SEQ-(500mL-or-15min)_W5-20	TARA_093_DCM_5-20	Coastal Biome	[SPO] South Pacific Ocean	[CHIL] Chile-Peru Current Coastal Province (MRGID:21495)	[DCM] deep chlorophyll maximum layer (ENVO:01000326)	2011-03-12T19:36:38	-33,9116	-73,0537	21,86	2011-03-12	14:34	17,92	34,31	239,35	-1,13	0,50	0,60	98,39	1463,06	7,55	3	0,78	https://ws.pangaea.de/dds-fdp/rest/panquery?datasetDOI=doi.pangaea.de/10.1594/PANGAEA.853810&filterParameterValue=1,TARA_N000001115	https://ws.pangaea.de/dds-fdp/rest/panquery?datasetDOI=doi.pangaea.de/10.1594/PANGAEA.858201&filterParameterValue=1,TARA_N000001115	https://ws.pangaea.de/dds-fdp/rest/panquery?datasetDOI=doi.pangaea.de/10.1594/PANGAEA.858207&filterParameterValue=1,TARA_N000001115	https://ws.pangaea.de/dds-fdp/rest/panquery?datasetDOI=doi.pangaea.de/10.1594/PANGAEA.842197&filterParameterValue=1,TARA_N000001115
TARA_N000001306	TARA_093	SEQ-(100L-or-15min)_W>0.8	TARA_093_SRF_0.8-2000	Coastal Biome	[SPO] South Pacific Ocean	[CHIL] Chile-Peru Current Coastal Province (MRGID:21495)	[SRF] surface water layer (ENVO:00010504)	2011-03-12T11:34	-34,0614	-73,1066	5,54	2011-03-13	06:31	18,21	34,33	243,03	-1,39	0,20	0,52	98,39	1326,94	0,02	4	0,36	https://ws.pangaea.de/dds-fdp/rest/panquery?datasetDOI=doi.pangaea.de/10.1594/PANGAEA.853810&filterParameterValue=1,TARA_N000001306	https://ws.pangaea.de/dds-fdp/rest/panquery?datasetDOI=doi.pangaea.de/10.1594/PANGAEA.858201&filterParameterValue=1,TARA_N000001306	https://ws.pangaea.de/dds-fdp/rest/panquery?datasetDOI=doi.pangaea.de/10.1594/PANGAEA.858207&filterParameterValue=1,TARA_N000001306	https://ws.pangaea.de/dds-fdp/rest/panquery?datasetDOI=doi.pangaea.de/10.1594/PANGAEA.842197&filterParameterValue=1,TARA_N000001306
TARA_N000001296	TARA_093	SEQ-(100L-or-15min)_W0.8-5	TARA_093_SRF_0.8-5	Coastal Biome	[SPO] South Pacific Ocean	[CHIL] Chile-Peru Current Coastal Province (MRGID:21495)	[SRF] surface water layer (ENVO:00010504)	2011-03-12T11:34	-34,0614	-73,1066	5,54	2011-03-13	06:31	18,21	34,33	243,03	-1,39	0,20	0,52	98,39	1326,94	0,02	4	0,36	https://ws.pangaea.de/dds-fdp/rest/panquery?datasetDOI=doi.pangaea.de/10.1594/PANGAEA.853810&filterParameterValue=1,TARA_N000001296	https://ws.pangaea.de/dds-fdp/rest/panquery?datasetDOI=doi.pangaea.de/10.1594/PANGAEA.858201&filterParameterValue=1,TARA_N000001296	https://ws.pangaea.de/dds-fdp/rest/panquery?datasetDOI=doi.pangaea.de/10.1594/PANGAEA.858207&filterParameterValue=1,TARA_N000001296	https://ws.pangaea.de/dds-fdp/rest/panquery?datasetDOI=doi.pangaea.de/10.1594/PANGAEA.842197&filterParameterValue=1,TARA_N000001296
TARA_N000001288	TARA_093	SEQ-(500mL-or-15min)_N180-2000	TARA_093_SRF_180-2000	Coastal Biome	[SPO] South Pacific Ocean	[CHIL] Chile-Peru Current Coastal Province (MRGID:21495)	[SRF] surface water layer (ENVO:00010504)	2011-03-12T17:22	-34,0374	-73,09	5,54	2011-03-12	12:19	18,21	34,33	243,03	-1,39	0,20	0,52	98,39	1326,94	0,02	4	0,36	https://ws.pangaea.de/dds-fdp/rest/panquery?datasetDOI=doi.pangaea.de/10.1594/PANGAEA.853810&filterParameterValue=1,TARA_N000001288	https://ws.pangaea.de/dds-fdp/rest/panquery?datasetDOI=doi.pangaea.de/10.1594/PANGAEA.858201&filterParameterValue=1,TARA_N000001288	https://ws.pangaea.de/dds-fdp/rest/panquery?datasetDOI=doi.pangaea.de/10.1594/PANGAEA.858207&filterParameterValue=1,TARA_N000001288	https://ws.pangaea.de/dds-fdp/rest/panquery?datasetDOI=doi.pangaea.de/10.1594/PANGAEA.842197&filterParameterValue=1,TARA_N000001288
TARA_N000001290	TARA_093	SEQ-(500mL-or-15min)_N20-180	TARA_093_SRF_20-180	Coastal Biome	[SPO] South Pacific Ocean	[CHIL] Chile-Peru Current Coastal Province (MRGID:21495)	[SRF] surface water layer (ENVO:00010504)	2011-03-12T11:34	-34,0614	-73,1066	5,54	2011-03-13	06:31	18,21	34,33	243,03	-1,39	0,20	0,52	98,39	1326,94	0,02	4	0,36	https://ws.pangaea.de/dds-fdp/rest/panquery?datasetDOI=doi.pangaea.de/10.1594/PANGAEA.853810&filterParameterValue=1,TARA_N000001290	https://ws.pangaea.de/dds-fdp/rest/panquery?datasetDOI=doi.pangaea.de/10.1594/PANGAEA.858201&filterParameterValue=1,TARA_N000001290	https://ws.pangaea.de/dds-fdp/rest/panquery?datasetDOI=doi.pangaea.de/10.1594/PANGAEA.858207&filterParameterValue=1,TARA_N000001290	https://ws.pangaea.de/dds-fdp/rest/panquery?datasetDOI=doi.pangaea.de/10.1594/PANGAEA.842197&filterParameterValue=1,TARA_N000001290
TARA_N000001292	TARA_093	SEQ-(500mL-or-15min)_W5-20	TARA_093_SRF_5-20	Coastal Biome	[SPO] South Pacific Ocean	[CHIL] Chile-Peru Current Coastal Province (MRGID:21495)	[SRF] surface water layer (ENVO:00010504)	2011-03-12T11:34	-34,0614	-73,1066	5,54	2011-03-13	06:31	18,21	34,33	243,03	-1,39	0,20	0,52	98,39	1326,94	0,02	4	0,36	https://ws.pangaea.de/dds-fdp/rest/panquery?datasetDOI=doi.pangaea.de/10.1594/PANGAEA.853810&filterParameterValue=1,TARA_N000001292	https://ws.pangaea.de/dds-fdp/rest/panquery?datasetDOI=doi.pangaea.de/10.1594/PANGAEA.858201&filterParameterValue=1,TARA_N000001292	https://ws.pangaea.de/dds-fdp/rest/panquery?datasetDOI=doi.pangaea.de/10.1594/PANGAEA.858207&filterParameterValue=1,TARA_N000001292	https://ws.pangaea.de/dds-fdp/rest/panquery?datasetDOI=doi.pangaea.de/10.1594/PANGAEA.842197&filterParameterValue=1,TARA_N000001292
TARA_N000001561	TARA_098	SEQ-(100L-or-15min)_W0.8-5	TARA_098_DCM_0.8-5	Trades Biome	[SPO] South Pacific Ocean	[SPSG] South Pacific Subtropical Gyre Province, North and South (MRGID:21486)	[DCM] deep chlorophyll maximum layer (ENVO:01000326)	2011-04-03T21:50:58	-25826	-111,7294	167,44	2011-04-03	14:19	20,33	35,87	212,88	0,18	0,14	0,10	271,91	68,85	0,05	196	0,04	https://ws.pangaea.de/dds-fdp/rest/panquery?datasetDOI=doi.pangaea.de/10.1594/PANGAEA.853810&filterParameterValue=1,TARA_N000001561	https://ws.pangaea.de/dds-fdp/rest/panquery?datasetDOI=doi.pangaea.de/10.1594/PANGAEA.858201&filterParameterValue=1,TARA_N000001561	https://ws.pangaea.de/dds-fdp/rest/panquery?datasetDOI=doi.pangaea.de/10.1594/PANGAEA.858207&filterParameterValue=1,TARA_N000001561	https://ws.pangaea.de/dds-fdp/rest/panquery?datasetDOI=doi.pangaea.de/10.1594/PANGAEA.842197&filterParameterValue=1,TARA_N000001561
TARA_N000001588	TARA_098	SEQ-(100L-or-15min)_W0.8-5	TARA_098_DCM_0.8-5	Trades Biome	[SPO] South Pacific Ocean	[SPSG] South Pacific Subtropical Gyre Province, North and South (MRGID:21486)	[DCM] deep chlorophyll maximum layer (ENVO:01000326)	2011-04-03T21:50:58	-25826	-111,7294	167,44	2011-04-03	14:19	20,33	35,87	212,88	0,18	0,14	0,10	271,91	68,85	0,05	196	0,04	https://ws.pangaea.de/dds-fdp/rest/panquery?datasetDOI=doi.pangaea.de/10.1594/PANGAEA.853810&filterParameterValue=1,TARA_N000001588	https://ws.pangaea.de/dds-fdp/rest/panquery?datasetDOI=doi.pangaea.de/10.1594/PANGAEA.858201&filterParameterValue=1,TARA_N000001588	https://ws.pangaea.de/dds-fdp/rest/panquery?datasetDOI=doi.pangaea.de/10.1594/PANGAEA.858207&filterParameterValue=1,TARA_N000001588	https://ws.pangaea.de/dds-fdp/rest/panquery?datasetDOI=doi.pangaea.de/10.1594/PANGAEA.842197&filterParameterValue=1,TARA_N000001588
TARA_N000001594	TARA_098	SEQ-(500mL-or-15min)_N180-2000	TARA_098_DCM_180-2000	Trades Biome	[SPO] South Pacific Ocean	[SPSG] South Pacific Subtropical Gyre Province, North and South (MRGID:21486)	[DCM] deep chlorophyll maximum layer (ENVO:01000326)	2011-04-04T17:07	-25,8162	-111,7349	167,44	2011-04-05	09:37	20,33	35,87	212,88	0,18	0,14	0,10	271,91	68,85	0,05	196	0,04	https://ws.pangaea.de/dds-fdp/rest/panquery?datasetDOI=doi.pangaea.de/10.1594/PANGAEA.853810&filterParameterValue=1,TARA_N000001594	https://ws.pangaea.de/dds-fdp/rest/panquery?datasetDOI=doi.pangaea.de/10.1594/PANGAEA.858201&filterParameterValue=1,TARA_N000001594	https://ws.pangaea.de/dds-fdp/rest/panquery?datasetDOI=doi.pangaea.de/10.1594/PANGAEA.858207&filterParameterValue=1,TARA_N000001594	https://ws.pangaea.de/dds-fdp/rest/panquery?datasetDOI=doi.pangaea.de/10.1594/PANGAEA.842197&filterParameterValue=1,TARA_N000001594
TARA_N000001584	TARA_098	SEQ-(500mL-or-15min)_N20-180	TARA_098_DCM_20-180	Trades Biome	[SPO] South Pacific Ocean	[SPSG] South Pacific Subtropical Gyre Province, North and South (MRGID:21486)	[DCM] deep chlorophyll maximum layer (ENVO:01000326)	2011-04-04T17:07	-25,8162	-111,7349	167,44	2011-04-05	09:37	20,33	35,87	212,88	0,18	0,14	0,10	271,91	68,85	0,05	196	0,04	https://ws.pangaea.de/dds-fdp/rest/panquery?datasetDOI=doi.pangaea.de/10.1594/PANGAEA.853810&filterParameterValue=1,TARA_N000001584	https://ws.pangaea.de/dds-fdp/rest/panquery?datasetDOI=doi.pangaea.de/10.1594/PANGAEA.858201&filterParameterValue=1,TARA_N000001584	https://ws.pangaea.de/dds-fdp/rest/panquery?datasetDOI=doi.pangaea.de/10.1594/PANGAEA.858207&filterParameterValue=1,TARA_N000001584	https://ws.pangaea.de/dds-fdp/rest/panquery?datasetDOI=doi.pangaea.de/10.1594/PANGAEA.842197&filterParameterValue=1,TARA_N000001584
TARA_N000001580	TARA_098	SEQ-(500mL-or-15min)_W5-20	TARA_098_DCM_5-20	Trades Biome	[SPO] South Pacific Ocean	[SPSG] South Pacific Subtropical Gyre Province, North and South (MRGID:21486)	[DCM] deep chlorophyll maximum layer (ENVO:01000326)	2011-04-03T21:50:58	-25826	-111,7294	167,44	2011-04-03	14:19	20,33	35,87	212,88	0,18	0,14	0,10	271,91	68,85	0,05	196	0,04	https://ws.pangaea.de/dds-fdp/rest/panquery?datasetDOI=doi.pangaea.de/10.1594/PANGAEA.853810&filterParameterValue=1,TARA_N000001580	https://ws.pangaea.de/dds-fdp/rest/panquery?datasetDOI=doi.pangaea.de/10.1594/PANGAEA.858201&filterParameterValue=1,TARA_N000001580	https://ws.pangaea.de/dds-fdp/rest/panquery?datasetDOI=doi.pangaea.de/10.1594/PANGAEA.858207&filterParameterValue=1,TARA_N000001580	https://ws.pangaea.de/dds-fdp/rest/panquery?datasetDOI=doi.pangaea.de/10.1594/PANGAEA.842197&filterParameterValue=1,TARA_N000001580
TARA_N000001586	TARA_098	SEQ-(500mL-or-15min)_N180-2000	TARA_098_SRF_180-2000	Trades Biome	[SPO] South Pacific Ocean	[SPSG] South Pacific Subtropical Gyre Province, North and South (MRGID:21486)	[SRF] surface water layer (ENVO:00010504)	2011-04-03T14:17	-25,8073	-111,7364	5,56	2011-04-04	06:46	25,15	36,40	200,54	-1,57	0,01	0,20	271,91	63,56	0,05	228	0,01	https://ws.pangaea.de/dds-fdp/rest/panquery?datasetDOI=doi.pangaea.de/10.1594/PANGAEA.853810&filterParameterValue=1,TARA_N000001586	https://ws.pangaea.de/dds-fdp/rest/panquery?datasetDOI=doi.pangaea.de/10.1594/PANGAEA.858201&filterParameterValue=1,TARA_N000001586	https://ws.pangaea.de/dds-fdp/rest/panquery?datasetDOI=doi.pangaea.de/10.1594/PANGAEA.858207&filterParameterValue=1,TARA_N000001586	https://ws.pangaea.de/dds-fdp/rest/panquery?datasetDOI=doi.pangaea.de/10.1594/PANGAEA.842197&filterParameterValue=1,TARA_N000001586
TARA_N000001582	TARA_098	SEQ-(500mL-or-15min)_N20-180	TARA_098_SRF_20-180	Trades Biome	[SPO] South Pacific Ocean	[SPSG] South Pacific Subtropical Gyre Province, North and South (MRGID:21486)	[SRF] surface water layer (ENVO:00010504)	2011-04-03T16:28	-25,8105	-111,7329	5,56	2011-04-04	08:57	25,15	36,40	200,54	-1,57	0,01	0,20	271,91	63,56	0,05	228	0,01	https://ws.pangaea.de/dds-fdp/rest/panquery?datasetDOI=doi.pangaea.de/10.1594/PANGAEA.853810&filterParameterValue=1,TARA_N000001582	https://ws.pangaea.de/dds-fdp/rest/panquery?datasetDOI=doi.pangaea.de/10.1594/PANGAEA.858201&filterParameterValue=1,TARA_N000001582	https://ws.pangaea.de/dds-fdp/rest/panquery?datasetDOI=doi.pangaea.de/10.1594/PANGAEA.858207&filterParameterValue=1,TARA_N000001582	https://ws.pangaea.de/dds-fdp/rest/panquery?datasetDOI=doi.pangaea.de/10.1594/PANGAEA.842197&filterParameterValue=1,TARA_N000001582
TARA_N000001578	TARA_098	SEQ-(500mL-or-15min)_W5-20	TARA_098_SRF_5-20	Trades Biome	[SPO] South Pacific Ocean	[SPSG] South Pacific Subtropical Gyre Province, North and South (MRGID:21486)	[SRF] surface water layer (ENVO:00010504)	2011-04-03T13:44	-25,8051	-111,7202	5,56	2011-04-04	06:13	25,15	36,40	200,54	-1,57	0,01	0,20	271,91	63,56	0,05	228	0,01	https://ws.pangaea.de/dds-fdp/rest/panquery?datasetDOI=doi.pangaea.de/10.1594/PANGAEA.853810&filterParameterValue=1,TARA_N000001578	https://ws.pangaea.de/dds-fdp/rest/panquery?datasetDOI=doi.pangaea.de/10.1594/PANGAEA.858201&filterParameterValue=1,TARA_N000001578	https://ws.pangaea.de/dds-fdp/rest/panquery?datasetDOI=doi.pangaea.de/10.1594/PANGAEA.858207&filterParameterValue=1,TARA_N000001578	https://ws.pangaea.de/dds-fdp/rest/panquery?datasetDOI=doi.pangaea.de/10.1594/PANGAEA.842197&filterParameterValue=1,TARA_N000001578
TARA_N000001606	TARA_100	SEQ-(100L-or-15min)_W>0.8	TARA_100_DCM_0.8-2000	Trades Biome	[SPO] South Pacific Ocean	[SPSG] South Pacific Subtropical Gyre Province, North and South (MRGID:21486)	[DCM] deep chlorophyll maximum layer (ENVO:01000326)	2011-04-15T19:38	-12,9723	-96,0122	59,62	2011-04-15	13:13	19,43	35,44	224,85	0,37	0,39	0,78	1408,20	398,56	5,70	3	0,33	https://ws.pangaea.de/dds-fdp/rest/panquery?datasetDOI=doi.pangaea.de/10.1594/PANGAEA.853810&filterParameterValue=1,TARA_N000001606	https://ws.pangaea.de/dds-fdp/rest/panquery?datasetDOI=doi.pangaea.de/10.1594/PANGAEA.858201&filterParameterValue=1,TARA_N000001606	https://ws.pangaea.de/dds-fdp/rest/panquery?datasetDOI=doi.pangaea.de/10.1594/PANGAEA.858207&filterParameterValue=1,TARA_N000001606	https://ws.pangaea.de/dds-fdp/rest/panquery?datasetDOI=doi.pangaea.de/10.1594/PANGAEA.842197&filterParameterValue=1,TARA_N000001606
TARA_N000001642	TARA_100	SEQ-(100L-or-15min)_W0.8-3	TARA_100_DCM_0.8-3	Trades Biome	[SPO] South Pacific Ocean	[SPSG] South Pacific Subtropical Gyre Province, North and South (MRGID:21486)	[DCM] deep chlorophyll maximum layer (ENVO:01000326)	2011-04-16T13:03:08	-12,9794	-96,0232	59,62	2011-04-17	06:39	19,43	35,44	224,85	0,37	0,39	0,78	1408,20	398,56	5,70	3	0,33	https://ws.pangaea.de/dds-fdp/rest/panquery?datasetDOI=doi.pangaea.de/10.1594/PANGAEA.853810&filterParameterValue=1,TARA_N000001642	https://ws.pangaea.de/dds-fdp/rest/panquery?datasetDOI=doi.pangaea.de/10.1594/PANGAEA.858201&filterParameterValue=1,TARA_N000001642	https://ws.pangaea.de/dds-fdp/rest/panquery?datasetDOI=doi.pangaea.de/10.1594/PANGAEA.858207&filterParameterValue=1,TARA_N000001642	https://ws.pangaea.de/dds-fdp/rest/panquery?datasetDOI=doi.pangaea.de/10.1594/PANGAEA.842197&filterParameterValue=1,TARA_N000001642
TARA_N000001610	TARA_100	SEQ-(100L-or-15min)_W0.8-5	TARA_100_DCM_0.8-5	Trades Biome	[SPO] South Pacific Ocean	[SPSG] South Pacific Subtropical Gyre Province, North and South (MRGID:21486)	[DCM] deep chlorophyll maximum layer (ENVO:01000326)	2011-04-15T19:38	-12,9723	-96,0122	59,62	2011-04-15	13:13	19,43	35,44	224,85	0,37	0,39	0,78	1408,20	398,56	5,70	3	0,33	https://ws.pangaea.de/dds-fdp/rest/panquery?datasetDOI=doi.pangaea.de/10.1594/PANGAEA.853810&filterParameterValue=1,TARA_N000001610	https://ws.pangaea.de/dds-fdp/rest/panquery?datasetDOI=doi.pangaea.de/10.1594/PANGAEA.858201&filterParameterValue=1,TARA_N000001610	https://ws.pangaea.de/dds-fdp/rest/panquery?datasetDOI=doi.pangaea.de/10.1594/PANGAEA.858207&filterParameterValue=1,TARA_N000001610	https://ws.pangaea.de/dds-fdp/rest/panquery?datasetDOI=doi.pangaea.de/10.1594/PANGAEA.842197&filterParameterValue=1,TARA_N000001610
TARA_N000001622	TARA_100	SEQ-(500mL-or-15min)_N180-2000	TARA_100_DCM_180-2000	Trades Biome	[SPO] South Pacific Ocean	[SPSG] South Pacific Subtropical Gyre Province, North and South (MRGID:21486)	[DCM] deep chlorophyll maximum layer (ENVO:01000326)	2011-04-15T23:30	-12,9214	-96,0953	59,62	2011-04-15	17:05	19,43	35,44	224,85	0,37	0,39	0,78	1408,20	398,56	5,70	3	0,33	https://ws.pangaea.de/dds-fdp/rest/panquery?datasetDOI=doi.pangaea.de/10.1594/PANGAEA.853810&filterParameterValue=1,TARA_N000001622	https://ws.pangaea.de/dds-fdp/rest/panquery?datasetDOI=doi.pangaea.de/10.1594/PANGAEA.858201&filterParameterValue=1,TARA_N000001622	https://ws.pangaea.de/dds-fdp/rest/panquery?datasetDOI=doi.pangaea.de/10.1594/PANGAEA.858207&filterParameterValue=1,TARA_N000001622	https://ws.pangaea.de/dds-fdp/rest/panquery?datasetDOI=doi.pangaea.de/10.1594/PANGAEA.842197&filterParameterValue=1,TARA_N000001622
TARA_N000001618	TARA_100	SEQ-(500mL-or-15min)_N20-180	TARA_100_DCM_20-180	Trades Biome	[SPO] South Pacific Ocean	[SPSG] South Pacific Subtropical Gyre Province, North and South (MRGID:21486)	[DCM] deep chlorophyll maximum layer (ENVO:01000326)	2011-04-16T00:04	-12,9119	-96,1101	59,62	2011-04-16	17:39	19,43	35,44	224,85	0,37	0,39	0,78	1408,20	398,56	5,70	3	0,33	https://ws.pangaea.de/dds-fdp/rest/panquery?datasetDOI=doi.pangaea.de/10.1594/PANGAEA.853810&filterParameterValue=1,TARA_N000001618	https://ws.pangaea.de/dds-fdp/rest/panquery?datasetDOI=doi.pangaea.de/10.1594/PANGAEA.858201&filterParameterValue=1,TARA_N000001618	https://ws.pangaea.de/dds-fdp/rest/panquery?datasetDOI=doi.pangaea.de/10.1594/PANGAEA.858207&filterParameterValue=1,TARA_N000001618	https://ws.pangaea.de/dds-fdp/rest/panquery?datasetDOI=doi.pangaea.de/10.1594/PANGAEA.842197&filterParameterValue=1,TARA_N000001618
TARA_N000001643	TARA_100	SEQ-(100L-or-15min)_W>3	TARA_100_DCM_3-2000	Trades Biome	[SPO] South Pacific Ocean	[SPSG] South Pacific Subtropical Gyre Province, North and South (MRGID:21486)	[DCM] deep chlorophyll maximum layer (ENVO:01000326)	2011-04-16T13:03:08	-12,9794	-96,0232	59,62	2011-04-17	06:39	19,43	35,44	224,85	0,37	0,39	0,78	1408,20	398,56	5,70	3	0,33	https://ws.pangaea.de/dds-fdp/rest/panquery?datasetDOI=doi.pangaea.de/10.1594/PANGAEA.853810&filterParameterValue=1,TARA_N000001643	https://ws.pangaea.de/dds-fdp/rest/panquery?datasetDOI=doi.pangaea.de/10.1594/PANGAEA.858201&filterParameterValue=1,TARA_N000001643	https://ws.pangaea.de/dds-fdp/rest/panquery?datasetDOI=doi.pangaea.de/10.1594/PANGAEA.858207&filterParameterValue=1,TARA_N000001643	https://ws.pangaea.de/dds-fdp/rest/panquery?datasetDOI=doi.pangaea.de/10.1594/PANGAEA.842197&filterParameterValue=1,TARA_N000001643
TARA_N000001614	TARA_100	SEQ-(500mL-or-15min)_W5-20	TARA_100_DCM_5-20	Trades Biome	[SPO] South Pacific Ocean	[SPSG] South Pacific Subtropical Gyre Province, North and South (MRGID:21486)	[DCM] deep chlorophyll maximum layer (ENVO:01000326)	2011-04-15T19:38	-12,9723	-96,0122	59,62	2011-04-15	13:13	19,43	35,44	224,85	0,37	0,39	0,78	1408,20	398,56	5,70	3	0,33	https://ws.pangaea.de/dds-fdp/rest/panquery?datasetDOI=doi.pangaea.de/10.1594/PANGAEA.853810&filterParameterValue=1,TARA_N000001614	https://ws.pangaea.de/dds-fdp/rest/panquery?datasetDOI=doi.pangaea.de/10.1594/PANGAEA.858201&filterParameterValue=1,TARA_N000001614	https://ws.pangaea.de/dds-fdp/rest/panquery?datasetDOI=doi.pangaea.de/10.1594/PANGAEA.858207&filterParameterValue=1,TARA_N000001614	https://ws.pangaea.de/dds-fdp/rest/panquery?datasetDOI=doi.pangaea.de/10.1594/PANGAEA.842197&filterParameterValue=1,TARA_N000001614
TARA_N000001604	TARA_100	SEQ-(100L-or-15min)_W>0.8	TARA_100_SRF_0.8-2000	Trades Biome	[SPO] South Pacific Ocean	[SPSG] South Pacific Subtropical Gyre Province, North and South (MRGID:21486)	[SRF] surface water layer (ENVO:00010504)	2011-04-15T12:45	-13,0023	-95,9759	5,48	2011-04-16	06:20	25,25	35,84	200,23	4,59	0,29	0,68	1408,20	398,56	6,20	3	0,21	https://ws.pangaea.de/dds-fdp/rest/panquery?datasetDOI=doi.pangaea.de/10.1594/PANGAEA.853810&filterParameterValue=1,TARA_N000001604	https://ws.pangaea.de/dds-fdp/rest/panquery?datasetDOI=doi.pangaea.de/10.1594/PANGAEA.858201&filterParameterValue=1,TARA_N000001604	https://ws.pangaea.de/dds-fdp/rest/panquery?datasetDOI=doi.pangaea.de/10.1594/PANGAEA.858207&filterParameterValue=1,TARA_N000001604	https://ws.pangaea.de/dds-fdp/rest/panquery?datasetDOI=doi.pangaea.de/10.1594/PANGAEA.842197&filterParameterValue=1,TARA_N000001604
TARA_N000001608	TARA_100	SEQ-(100L-or-15min)_W0.8-5	TARA_100_SRF_0.8-5	Trades Biome	[SPO] South Pacific Ocean	[SPSG] South Pacific Subtropical Gyre Province, North and South (MRGID:21486)	[SRF] surface water layer (ENVO:00010504)	2011-04-15T12:45	-13,0023	-95,9759	5,48	2011-04-16	06:20	25,25	35,84	200,23	4,59	0,29	0,68	1408,20	398,56	6,20	3	0,21	https://ws.pangaea.de/dds-fdp/rest/panquery?datasetDOI=doi.pangaea.de/10.1594/PANGAEA.853810&filterParameterValue=1,TARA_N000001608	https://ws.pangaea.de/dds-fdp/rest/panquery?datasetDOI=doi.pangaea.de/10.1594/PANGAEA.858201&filterParameterValue=1,TARA_N000001608	https://ws.pangaea.de/dds-fdp/rest/panquery?datasetDOI=doi.pangaea.de/10.1594/PANGAEA.858207&filterParameterValue=1,TARA_N000001608	https://ws.pangaea.de/dds-fdp/rest/panquery?datasetDOI=doi.pangaea.de/10.1594/PANGAEA.842197&filterParameterValue=1,TARA_N000001608
TARA_N000001620	TARA_100	SEQ-(500mL-or-15min)_N180-2000	TARA_100_SRF_180-2000	Trades Biome	[SPO] South Pacific Ocean	[SPSG] South Pacific Subtropical Gyre Province, North and South (MRGID:21486)	[SRF] surface water layer (ENVO:00010504)	2011-04-15T17:19	-12,9359	-96,0413	5,48	2011-04-16	10:54	25,25	35,84	200,23	4,59	0,29	0,68	1408,20	398,56	6,20	3	0,21	https://ws.pangaea.de/dds-fdp/rest/panquery?datasetDOI=doi.pangaea.de/10.1594/PANGAEA.853810&filterParameterValue=1,TARA_N000001620	https://ws.pangaea.de/dds-fdp/rest/panquery?datasetDOI=doi.pangaea.de/10.1594/PANGAEA.858201&filterParameterValue=1,TARA_N000001620	https://ws.pangaea.de/dds-fdp/rest/panquery?datasetDOI=doi.pangaea.de/10.1594/PANGAEA.858207&filterParameterValue=1,TARA_N000001620	https://ws.pangaea.de/dds-fdp/rest/panquery?datasetDOI=doi.pangaea.de/10.1594/PANGAEA.842197&filterParameterValue=1,TARA_N000001620
TARA_N000001616	TARA_100	SEQ-(500mL-or-15min)_N20-180	TARA_100_SRF_20-180	Trades Biome	[SPO] South Pacific Ocean	[SPSG] South Pacific Subtropical Gyre Province, North and South (MRGID:21486)	[SRF] surface water layer (ENVO:00010504)	2011-04-15T13:27	-12991	-95,9893	5,48	2011-04-16	07:02	25,25	35,84	200,23	4,59	0,29	0,68	1408,20	398,56	6,20	3	0,21	https://ws.pangaea.de/dds-fdp/rest/panquery?datasetDOI=doi.pangaea.de/10.1594/PANGAEA.853810&filterParameterValue=1,TARA_N000001616	https://ws.pangaea.de/dds-fdp/rest/panquery?datasetDOI=doi.pangaea.de/10.1594/PANGAEA.858201&filterParameterValue=1,TARA_N000001616	https://ws.pangaea.de/dds-fdp/rest/panquery?datasetDOI=doi.pangaea.de/10.1594/PANGAEA.858207&filterParameterValue=1,TARA_N000001616	https://ws.pangaea.de/dds-fdp/rest/panquery?datasetDOI=doi.pangaea.de/10.1594/PANGAEA.842197&filterParameterValue=1,TARA_N000001616
TARA_N000001612	TARA_100	SEQ-(500mL-or-15min)_N5-20	TARA_100_SRF_5-20	Trades Biome	[SPO] South Pacific Ocean	[SPSG] South Pacific Subtropical Gyre Province, North and South (MRGID:21486)	[SRF] surface water layer (ENVO:00010504)	2011-04-15T16:25	-12,9488	-96,0293	5,48	2011-04-16	10:00	25,25	35,84	200,23	4,59	0,29	0,68	1408,20	398,56	6,20	3	0,21	https://ws.pangaea.de/dds-fdp/rest/panquery?datasetDOI=doi.pangaea.de/10.1594/PANGAEA.853810&filterParameterValue=1,TARA_N000001612	https://ws.pangaea.de/dds-fdp/rest/panquery?datasetDOI=doi.pangaea.de/10.1594/PANGAEA.858201&filterParameterValue=1,TARA_N000001612	https://ws.pangaea.de/dds-fdp/rest/panquery?datasetDOI=doi.pangaea.de/10.1594/PANGAEA.858207&filterParameterValue=1,TARA_N000001612	https://ws.pangaea.de/dds-fdp/rest/panquery?datasetDOI=doi.pangaea.de/10.1594/PANGAEA.842197&filterParameterValue=1,TARA_N000001612
TARA_N000001648	TARA_102	SEQ-(100L-or-15min)_W>0.8	TARA_102_DCM_0.8-2000	Trades Biome	[SPO] South Pacific Ocean	[PEOD] Pacific Equatorial Divergence Province (MRGID:21489)	[DCM] deep chlorophyll maximum layer (ENVO:01000326)	2011-04-22T21:13	-5,2669	-85,2732	38,18	2011-04-22	15:33	22,45	34,85	146,13	14,65	0,68	1,86	437,42	500,29	24,40	5	0,56	https://ws.pangaea.de/dds-fdp/rest/panquery?datasetDOI=doi.pangaea.de/10.1594/PANGAEA.853810&filterParameterValue=1,TARA_N000001648	https://ws.pangaea.de/dds-fdp/rest/panquery?datasetDOI=doi.pangaea.de/10.1594/PANGAEA.858201&filterParameterValue=1,TARA_N000001648	https://ws.pangaea.de/dds-fdp/rest/panquery?datasetDOI=doi.pangaea.de/10.1594/PANGAEA.858207&filterParameterValue=1,TARA_N000001648	https://ws.pangaea.de/dds-fdp/rest/panquery?datasetDOI=doi.pangaea.de/10.1594/PANGAEA.842197&filterParameterValue=1,TARA_N000001648
TARA_N000001652	TARA_102	SEQ-(100L-or-15min)_W0.8-5	TARA_102_DCM_0.8-5	Trades Biome	[SPO] South Pacific Ocean	[PEOD] Pacific Equatorial Divergence Province (MRGID:21489)	[DCM] deep chlorophyll maximum layer (ENVO:01000326)	2011-04-22T21:13	-5,2669	-85,2732	38,18	2011-04-22	15:33	22,45	34,85	146,13	14,65	0,68	1,86	437,42	500,29	24,40	5	0,56	https://ws.pangaea.de/dds-fdp/rest/panquery?datasetDOI=doi.pangaea.de/10.1594/PANGAEA.853810&filterParameterValue=1,TARA_N000001652	https://ws.pangaea.de/dds-fdp/rest/panquery?datasetDOI=doi.pangaea.de/10.1594/PANGAEA.858201&filterParameterValue=1,TARA_N000001652	https://ws.pangaea.de/dds-fdp/rest/panquery?datasetDOI=doi.pangaea.de/10.1594/PANGAEA.858207&filterParameterValue=1,TARA_N000001652	https://ws.pangaea.de/dds-fdp/rest/panquery?datasetDOI=doi.pangaea.de/10.1594/PANGAEA.842197&filterParameterValue=1,TARA_N000001652
TARA_N000001664	TARA_102	SEQ-(500mL-or-15min)_N180-2000	TARA_102_DCM_180-2000	Trades Biome	[SPO] South Pacific Ocean	[PEOD] Pacific Equatorial Divergence Province (MRGID:21489)	[DCM] deep chlorophyll maximum layer (ENVO:01000326)	2011-04-22T19:20	-5,2692	-85,2121	38,18	2011-04-22	13:40	22,45	34,85	146,13	14,65	0,68	1,86	437,42	500,29	24,40	5	0,56	https://ws.pangaea.de/dds-fdp/rest/panquery?datasetDOI=doi.pangaea.de/10.1594/PANGAEA.853810&filterParameterValue=1,TARA_N000001664	https://ws.pangaea.de/dds-fdp/rest/panquery?datasetDOI=doi.pangaea.de/10.1594/PANGAEA.858201&filterParameterValue=1,TARA_N000001664	https://ws.pangaea.de/dds-fdp/rest/panquery?datasetDOI=doi.pangaea.de/10.1594/PANGAEA.858207&filterParameterValue=1,TARA_N000001664	https://ws.pangaea.de/dds-fdp/rest/panquery?datasetDOI=doi.pangaea.de/10.1594/PANGAEA.842197&filterParameterValue=1,TARA_N000001664
TARA_N000001660	TARA_102	SEQ-(500mL-or-15min)_N20-180	TARA_102_DCM_20-180	Trades Biome	[SPO] South Pacific Ocean	[PEOD] Pacific Equatorial Divergence Province (MRGID:21489)	[DCM] deep chlorophyll maximum layer (ENVO:01000326)	2011-04-22T20:17	-5,2686	-85248	38,18	2011-04-22	14:37	22,45	34,85	146,13	14,65	0,68	1,86	437,42	500,29	24,40	5	0,56	https://ws.pangaea.de/dds-fdp/rest/panquery?datasetDOI=doi.pangaea.de/10.1594/PANGAEA.853810&filterParameterValue=1,TARA_N000001660	https://ws.pangaea.de/dds-fdp/rest/panquery?datasetDOI=doi.pangaea.de/10.1594/PANGAEA.858201&filterParameterValue=1,TARA_N000001660	https://ws.pangaea.de/dds-fdp/rest/panquery?datasetDOI=doi.pangaea.de/10.1594/PANGAEA.858207&filterParameterValue=1,TARA_N000001660	https://ws.pangaea.de/dds-fdp/rest/panquery?datasetDOI=doi.pangaea.de/10.1594/PANGAEA.842197&filterParameterValue=1,TARA_N000001660
TARA_N000001656	TARA_102	SEQ-(500mL-or-15min)_W5-20	TARA_102_DCM_5-20	Trades Biome	[SPO] South Pacific Ocean	[PEOD] Pacific Equatorial Divergence Province (MRGID:21489)	[DCM] deep chlorophyll maximum layer (ENVO:01000326)	2011-04-22T21:13	-5,2669	-85,2732	38,18	2011-04-22	15:33	22,45	34,85	146,13	14,65	0,68	1,86	437,42	500,29	24,40	5	0,56	https://ws.pangaea.de/dds-fdp/rest/panquery?datasetDOI=doi.pangaea.de/10.1594/PANGAEA.853810&filterParameterValue=1,TARA_N000001656	https://ws.pangaea.de/dds-fdp/rest/panquery?datasetDOI=doi.pangaea.de/10.1594/PANGAEA.858201&filterParameterValue=1,TARA_N000001656	https://ws.pangaea.de/dds-fdp/rest/panquery?datasetDOI=doi.pangaea.de/10.1594/PANGAEA.858207&filterParameterValue=1,TARA_N000001656	https://ws.pangaea.de/dds-fdp/rest/panquery?datasetDOI=doi.pangaea.de/10.1594/PANGAEA.842197&filterParameterValue=1,TARA_N000001656
TARA_N000001646	TARA_102	SEQ-(100L-or-15min)_W>0.8	TARA_102_SRF_0.8-2000	Trades Biome	[SPO] South Pacific Ocean	[PEOD] Pacific Equatorial Divergence Province (MRGID:21489)	[SRF] surface water layer (ENVO:00010504)	2011-04-21T20:07	-5,2529	-85,1545	5,53	2011-04-21	14:27	25,28	34,81	203,89	12,42	0,58	1,00	437,42	500,29	12,60	4	0,69	https://ws.pangaea.de/dds-fdp/rest/panquery?datasetDOI=doi.pangaea.de/10.1594/PANGAEA.853810&filterParameterValue=1,TARA_N000001646	https://ws.pangaea.de/dds-fdp/rest/panquery?datasetDOI=doi.pangaea.de/10.1594/PANGAEA.858201&filterParameterValue=1,TARA_N000001646	https://ws.pangaea.de/dds-fdp/rest/panquery?datasetDOI=doi.pangaea.de/10.1594/PANGAEA.858207&filterParameterValue=1,TARA_N000001646	https://ws.pangaea.de/dds-fdp/rest/panquery?datasetDOI=doi.pangaea.de/10.1594/PANGAEA.842197&filterParameterValue=1,TARA_N000001646
TARA_N000001650	TARA_102	SEQ-(100L-or-15min)_W0.8-5	TARA_102_SRF_0.8-5	Trades Biome	[SPO] South Pacific Ocean	[PEOD] Pacific Equatorial Divergence Province (MRGID:21489)	[SRF] surface water layer (ENVO:00010504)	2011-04-21T20:07	-5,2529	-85,1545	5,53	2011-04-21	14:27	25,28	34,81	203,89	12,42	0,58	1,00	437,42	500,29	12,60	4	0,69	https://ws.pangaea.de/dds-fdp/rest/panquery?datasetDOI=doi.pangaea.de/10.1594/PANGAEA.853810&filterParameterValue=1,TARA_N000001650	https://ws.pangaea.de/dds-fdp/rest/panquery?datasetDOI=doi.pangaea.de/10.1594/PANGAEA.858201&filterParameterValue=1,TARA_N000001650	https://ws.pangaea.de/dds-fdp/rest/panquery?datasetDOI=doi.pangaea.de/10.1594/PANGAEA.858207&filterParameterValue=1,TARA_N000001650	https://ws.pangaea.de/dds-fdp/rest/panquery?datasetDOI=doi.pangaea.de/10.1594/PANGAEA.842197&filterParameterValue=1,TARA_N000001650
TARA_N000001662	TARA_102	SEQ-(500mL-or-15min)_N180-2000	TARA_102_SRF_180-2000	Trades Biome	[SPO] South Pacific Ocean	[PEOD] Pacific Equatorial Divergence Province (MRGID:21489)	[SRF] surface water layer (ENVO:00010504)	2011-04-21T23:03	-5,2537	-85,2221	5,53	2011-04-21	17:23	25,28	34,81	203,89	12,42	0,58	1,00	437,42	500,29	12,60	4	0,69	https://ws.pangaea.de/dds-fdp/rest/panquery?datasetDOI=doi.pangaea.de/10.1594/PANGAEA.853810&filterParameterValue=1,TARA_N000001662	https://ws.pangaea.de/dds-fdp/rest/panquery?datasetDOI=doi.pangaea.de/10.1594/PANGAEA.858201&filterParameterValue=1,TARA_N000001662	https://ws.pangaea.de/dds-fdp/rest/panquery?datasetDOI=doi.pangaea.de/10.1594/PANGAEA.858207&filterParameterValue=1,TARA_N000001662	https://ws.pangaea.de/dds-fdp/rest/panquery?datasetDOI=doi.pangaea.de/10.1594/PANGAEA.842197&filterParameterValue=1,TARA_N000001662
TARA_N000001658	TARA_102	SEQ-(500mL-or-15min)_N20-180	TARA_102_SRF_20-180	Trades Biome	[SPO] South Pacific Ocean	[PEOD] Pacific Equatorial Divergence Province (MRGID:21489)	[SRF] surface water layer (ENVO:00010504)	2011-04-21T20:42	-5,2514	-85,1696	5,53	2011-04-21	15:02	25,28	34,81	203,89	12,42	0,58	1,00	437,42	500,29	12,60	4	0,69	https://ws.pangaea.de/dds-fdp/rest/panquery?datasetDOI=doi.pangaea.de/10.1594/PANGAEA.853810&filterParameterValue=1,TARA_N000001658	https://ws.pangaea.de/dds-fdp/rest/panquery?datasetDOI=doi.pangaea.de/10.1594/PANGAEA.858201&filterParameterValue=1,TARA_N000001658	https://ws.pangaea.de/dds-fdp/rest/panquery?datasetDOI=doi.pangaea.de/10.1594/PANGAEA.858207&filterParameterValue=1,TARA_N000001658	https://ws.pangaea.de/dds-fdp/rest/panquery?datasetDOI=doi.pangaea.de/10.1594/PANGAEA.842197&filterParameterValue=1,TARA_N000001658
TARA_N000001654	TARA_102	SEQ-(500mL-or-15min)_N5-20	TARA_102_SRF_5-20	Trades Biome	[SPO] South Pacific Ocean	[PEOD] Pacific Equatorial Divergence Province (MRGID:21489)	[SRF] surface water layer (ENVO:00010504)	2011-04-21T22:22	-5252	-85,2052	5,53	2011-04-21	16:42	25,28	34,81	203,89	12,42	0,58	1,00	437,42	500,29	12,60	4	0,69	https://ws.pangaea.de/dds-fdp/rest/panquery?datasetDOI=doi.pangaea.de/10.1594/PANGAEA.853810&filterParameterValue=1,TARA_N000001654	https://ws.pangaea.de/dds-fdp/rest/panquery?datasetDOI=doi.pangaea.de/10.1594/PANGAEA.858201&filterParameterValue=1,TARA_N000001654	https://ws.pangaea.de/dds-fdp/rest/panquery?datasetDOI=doi.pangaea.de/10.1594/PANGAEA.858207&filterParameterValue=1,TARA_N000001654	https://ws.pangaea.de/dds-fdp/rest/panquery?datasetDOI=doi.pangaea.de/10.1594/PANGAEA.842197&filterParameterValue=1,TARA_N000001654
TARA_N000001728	TARA_109	SEQ-(100L-or-15min)_W>0.8	TARA_109_DCM_0.8-2000	Coastal Biome	[NPO] North Pacific Ocean	[CHIL] Chile-Peru Current Coastal Province (MRGID:21495)	[DCM] deep chlorophyll maximum layer (ENVO:01000326)	2011-05-12T22:15	2,0299	-84,5546	24,36	2011-05-12	16:40	27,02	34,09	205,33	2,01	0,42	0,49	511,19	379,92	4,60	4	0,54	https://ws.pangaea.de/dds-fdp/rest/panquery?datasetDOI=doi.pangaea.de/10.1594/PANGAEA.853810&filterParameterValue=1,TARA_N000001728	https://ws.pangaea.de/dds-fdp/rest/panquery?datasetDOI=doi.pangaea.de/10.1594/PANGAEA.858201&filterParameterValue=1,TARA_N000001728	https://ws.pangaea.de/dds-fdp/rest/panquery?datasetDOI=doi.pangaea.de/10.1594/PANGAEA.858207&filterParameterValue=1,TARA_N000001728	https://ws.pangaea.de/dds-fdp/rest/panquery?datasetDOI=doi.pangaea.de/10.1594/PANGAEA.842197&filterParameterValue=1,TARA_N000001728
TARA_N000001732	TARA_109	SEQ-(100L-or-15min)_W0.8-5	TARA_109_DCM_0.8-5	Coastal Biome	[NPO] North Pacific Ocean	[CHIL] Chile-Peru Current Coastal Province (MRGID:21495)	[DCM] deep chlorophyll maximum layer (ENVO:01000326)	2011-05-12T22:15	2,0299	-84,5546	24,36	2011-05-12	16:40	27,02	34,09	205,33	2,01	0,42	0,49	511,19	379,92	4,60	4	0,54	https://ws.pangaea.de/dds-fdp/rest/panquery?datasetDOI=doi.pangaea.de/10.1594/PANGAEA.853810&filterParameterValue=1,TARA_N000001732	https://ws.pangaea.de/dds-fdp/rest/panquery?datasetDOI=doi.pangaea.de/10.1594/PANGAEA.858201&filterParameterValue=1,TARA_N000001732	https://ws.pangaea.de/dds-fdp/rest/panquery?datasetDOI=doi.pangaea.de/10.1594/PANGAEA.858207&filterParameterValue=1,TARA_N000001732	https://ws.pangaea.de/dds-fdp/rest/panquery?datasetDOI=doi.pangaea.de/10.1594/PANGAEA.842197&filterParameterValue=1,TARA_N000001732
TARA_N000001740	TARA_109	SEQ-(500mL-or-15min)_N20-180	TARA_109_DCM_20-180	Coastal Biome	[NPO] North Pacific Ocean	[CHIL] Chile-Peru Current Coastal Province (MRGID:21495)	[DCM] deep chlorophyll maximum layer (ENVO:01000326)	2011-05-13T20:14	2,0218	-84,5652	24,36	2011-05-13	14:39	27,02	34,09	205,33	2,01	0,42	0,49	511,19	379,92	4,60	4	0,54	https://ws.pangaea.de/dds-fdp/rest/panquery?datasetDOI=doi.pangaea.de/10.1594/PANGAEA.853810&filterParameterValue=1,TARA_N000001740	https://ws.pangaea.de/dds-fdp/rest/panquery?datasetDOI=doi.pangaea.de/10.1594/PANGAEA.858201&filterParameterValue=1,TARA_N000001740	https://ws.pangaea.de/dds-fdp/rest/panquery?datasetDOI=doi.pangaea.de/10.1594/PANGAEA.858207&filterParameterValue=1,TARA_N000001740	https://ws.pangaea.de/dds-fdp/rest/panquery?datasetDOI=doi.pangaea.de/10.1594/PANGAEA.842197&filterParameterValue=1,TARA_N000001740
TARA_N000001796	TARA_109	SEQ-(500mL-or-15min)_N20-180	TARA_109_DCM_20-180	Coastal Biome	[NPO] North Pacific Ocean	[CHIL] Chile-Peru Current Coastal Province (MRGID:21495)	[DCM] deep chlorophyll maximum layer (ENVO:01000326)	2011-05-13T20:14	2,0218	-84,5652	24,36	2011-05-13	14:39	27,02	34,09	205,33	2,01	0,42	0,49	511,19	379,92	4,60	4	0,54	https://ws.pangaea.de/dds-fdp/rest/panquery?datasetDOI=doi.pangaea.de/10.1594/PANGAEA.853810&filterParameterValue=1,TARA_N000001796	https://ws.pangaea.de/dds-fdp/rest/panquery?datasetDOI=doi.pangaea.de/10.1594/PANGAEA.858201&filterParameterValue=1,TARA_N000001796	https://ws.pangaea.de/dds-fdp/rest/panquery?datasetDOI=doi.pangaea.de/10.1594/PANGAEA.858207&filterParameterValue=1,TARA_N000001796	https://ws.pangaea.de/dds-fdp/rest/panquery?datasetDOI=doi.pangaea.de/10.1594/PANGAEA.842197&filterParameterValue=1,TARA_N000001796
TARA_N000001727	TARA_109	SEQ-(100L-or-15min)_W>0.8	TARA_109_SRF_0.8-2000	Coastal Biome	[NPO] North Pacific Ocean	[CHIL] Chile-Peru Current Coastal Province (MRGID:21495)	[SRF] surface water layer (ENVO:00010504)	2011-05-12T14:00	1,9928	-84,5766	5,52	2011-05-13	08:25	27,90	33,18	199,90	0,45	0,20	0,27	511,19	359,83	0,90	5	0,35	https://ws.pangaea.de/dds-fdp/rest/panquery?datasetDOI=doi.pangaea.de/10.1594/PANGAEA.853810&filterParameterValue=1,TARA_N000001727	https://ws.pangaea.de/dds-fdp/rest/panquery?datasetDOI=doi.pangaea.de/10.1594/PANGAEA.858201&filterParameterValue=1,TARA_N000001727	https://ws.pangaea.de/dds-fdp/rest/panquery?datasetDOI=doi.pangaea.de/10.1594/PANGAEA.858207&filterParameterValue=1,TARA_N000001727	https://ws.pangaea.de/dds-fdp/rest/panquery?datasetDOI=doi.pangaea.de/10.1594/PANGAEA.842197&filterParameterValue=1,TARA_N000001727
TARA_N000001730	TARA_109	SEQ-(100L-or-15min)_W0.8-5	TARA_109_SRF_0.8-5	Coastal Biome	[NPO] North Pacific Ocean	[CHIL] Chile-Peru Current Coastal Province (MRGID:21495)	[SRF] surface water layer (ENVO:00010504)	2011-05-12T14:00	1,9928	-84,5766	5,52	2011-05-13	08:25	27,90	33,18	199,90	0,45	0,20	0,27	511,19	359,83	0,90	5	0,35	https://ws.pangaea.de/dds-fdp/rest/panquery?datasetDOI=doi.pangaea.de/10.1594/PANGAEA.853810&filterParameterValue=1,TARA_N000001730	https://ws.pangaea.de/dds-fdp/rest/panquery?datasetDOI=doi.pangaea.de/10.1594/PANGAEA.858201&filterParameterValue=1,TARA_N000001730	https://ws.pangaea.de/dds-fdp/rest/panquery?datasetDOI=doi.pangaea.de/10.1594/PANGAEA.858207&filterParameterValue=1,TARA_N000001730	https://ws.pangaea.de/dds-fdp/rest/panquery?datasetDOI=doi.pangaea.de/10.1594/PANGAEA.842197&filterParameterValue=1,TARA_N000001730
TARA_N000001742	TARA_109	SEQ-(500mL-or-15min)_N180-2000	TARA_109_SRF_180-2000	Coastal Biome	[NPO] North Pacific Ocean	[CHIL] Chile-Peru Current Coastal Province (MRGID:21495)	[SRF] surface water layer (ENVO:00010504)	2011-05-12T17:55	2,0574	-84,5546	5,52	2011-05-12	12:20	27,90	33,18	199,90	0,45	0,20	0,27	511,19	359,83	0,90	5	0,35	https://ws.pangaea.de/dds-fdp/rest/panquery?datasetDOI=doi.pangaea.de/10.1594/PANGAEA.853810&filterParameterValue=1,TARA_N000001742	https://ws.pangaea.de/dds-fdp/rest/panquery?datasetDOI=doi.pangaea.de/10.1594/PANGAEA.858201&filterParameterValue=1,TARA_N000001742	https://ws.pangaea.de/dds-fdp/rest/panquery?datasetDOI=doi.pangaea.de/10.1594/PANGAEA.858207&filterParameterValue=1,TARA_N000001742	https://ws.pangaea.de/dds-fdp/rest/panquery?datasetDOI=doi.pangaea.de/10.1594/PANGAEA.842197&filterParameterValue=1,TARA_N000001742
TARA_N000001738	TARA_109	SEQ-(500mL-or-15min)_N20-180	TARA_109_SRF_20-180	Coastal Biome	[NPO] North Pacific Ocean	[CHIL] Chile-Peru Current Coastal Province (MRGID:21495)	[SRF] surface water layer (ENVO:00010504)	2011-05-12T14:00	1,9958	-84576	5,52	2011-05-13	08:25	27,90	33,18	199,90	0,45	0,20	0,27	511,19	359,83	0,90	5	0,35	https://ws.pangaea.de/dds-fdp/rest/panquery?datasetDOI=doi.pangaea.de/10.1594/PANGAEA.853810&filterParameterValue=1,TARA_N000001738	https://ws.pangaea.de/dds-fdp/rest/panquery?datasetDOI=doi.pangaea.de/10.1594/PANGAEA.858201&filterParameterValue=1,TARA_N000001738	https://ws.pangaea.de/dds-fdp/rest/panquery?datasetDOI=doi.pangaea.de/10.1594/PANGAEA.858207&filterParameterValue=1,TARA_N000001738	https://ws.pangaea.de/dds-fdp/rest/panquery?datasetDOI=doi.pangaea.de/10.1594/PANGAEA.842197&filterParameterValue=1,TARA_N000001738
TARA_N000001734	TARA_109	SEQ-(500mL-or-15min)_N5-20	TARA_109_SRF_5-20	Coastal Biome	[NPO] North Pacific Ocean	[CHIL] Chile-Peru Current Coastal Province (MRGID:21495)	[SRF] surface water layer (ENVO:00010504)	2011-05-12T16:31	2,0399	-84,5599	5,52	2011-05-13	10:56	27,90	33,18	199,90	0,45	0,20	0,27	511,19	359,83	0,90	5	0,35	https://ws.pangaea.de/dds-fdp/rest/panquery?datasetDOI=doi.pangaea.de/10.1594/PANGAEA.853810&filterParameterValue=1,TARA_N000001734	https://ws.pangaea.de/dds-fdp/rest/panquery?datasetDOI=doi.pangaea.de/10.1594/PANGAEA.858201&filterParameterValue=1,TARA_N000001734	https://ws.pangaea.de/dds-fdp/rest/panquery?datasetDOI=doi.pangaea.de/10.1594/PANGAEA.858207&filterParameterValue=1,TARA_N000001734	https://ws.pangaea.de/dds-fdp/rest/panquery?datasetDOI=doi.pangaea.de/10.1594/PANGAEA.842197&filterParameterValue=1,TARA_N000001734
TARA_N000001748	TARA_110	SEQ-(100L-or-15min)_W>0.8	TARA_110_DCM_0.8-2000	Trades Biome	[SPO] South Pacific Ocean	[SPSG] South Pacific Subtropical Gyre Province, North and South (MRGID:21486)	[DCM] deep chlorophyll maximum layer (ENVO:01000326)	2011-05-21T21:00	-1,9002	-84,6265	37,76	2011-05-21	15:24	23,38	34,98	181,83	10,80	0,53	0,83	408,12	439,73	10,70	7	0,55	https://ws.pangaea.de/dds-fdp/rest/panquery?datasetDOI=doi.pangaea.de/10.1594/PANGAEA.853810&filterParameterValue=1,TARA_N000001748	https://ws.pangaea.de/dds-fdp/rest/panquery?datasetDOI=doi.pangaea.de/10.1594/PANGAEA.858201&filterParameterValue=1,TARA_N000001748	https://ws.pangaea.de/dds-fdp/rest/panquery?datasetDOI=doi.pangaea.de/10.1594/PANGAEA.858207&filterParameterValue=1,TARA_N000001748	https://ws.pangaea.de/dds-fdp/rest/panquery?datasetDOI=doi.pangaea.de/10.1594/PANGAEA.842197&filterParameterValue=1,TARA_N000001748
TARA_N000001752	TARA_110	SEQ-(100L-or-15min)_W0.8-5	TARA_110_DCM_0.8-5	Trades Biome	[SPO] South Pacific Ocean	[SPSG] South Pacific Subtropical Gyre Province, North and South (MRGID:21486)	[DCM] deep chlorophyll maximum layer (ENVO:01000326)	2011-05-21T21:00	-1,9002	-84,6265	37,76	2011-05-21	15:24	23,38	34,98	181,83	10,80	0,53	0,83	408,12	439,73	10,70	7	0,55	https://ws.pangaea.de/dds-fdp/rest/panquery?datasetDOI=doi.pangaea.de/10.1594/PANGAEA.853810&filterParameterValue=1,TARA_N000001752	https://ws.pangaea.de/dds-fdp/rest/panquery?datasetDOI=doi.pangaea.de/10.1594/PANGAEA.858201&filterParameterValue=1,TARA_N000001752	https://ws.pangaea.de/dds-fdp/rest/panquery?datasetDOI=doi.pangaea.de/10.1594/PANGAEA.858207&filterParameterValue=1,TARA_N000001752	https://ws.pangaea.de/dds-fdp/rest/panquery?datasetDOI=doi.pangaea.de/10.1594/PANGAEA.842197&filterParameterValue=1,TARA_N000001752
TARA_N000001764	TARA_110	SEQ-(500mL-or-15min)_N180-2000	TARA_110_DCM_180-2000	Trades Biome	[SPO] South Pacific Ocean	[SPSG] South Pacific Subtropical Gyre Province, North and South (MRGID:21486)	[DCM] deep chlorophyll maximum layer (ENVO:01000326)	2011-05-22T20:50	-1,8155	-84629	37,76	2011-05-22	15:14	23,38	34,98	181,83	10,80	0,53	0,83	408,12	439,73	10,70	7	0,55	https://ws.pangaea.de/dds-fdp/rest/panquery?datasetDOI=doi.pangaea.de/10.1594/PANGAEA.853810&filterParameterValue=1,TARA_N000001764	https://ws.pangaea.de/dds-fdp/rest/panquery?datasetDOI=doi.pangaea.de/10.1594/PANGAEA.858201&filterParameterValue=1,TARA_N000001764	https://ws.pangaea.de/dds-fdp/rest/panquery?datasetDOI=doi.pangaea.de/10.1594/PANGAEA.858207&filterParameterValue=1,TARA_N000001764	https://ws.pangaea.de/dds-fdp/rest/panquery?datasetDOI=doi.pangaea.de/10.1594/PANGAEA.842197&filterParameterValue=1,TARA_N000001764
TARA_N000001746	TARA_110	SEQ-(100L-or-15min)_W>0.8	TARA_110_SRF_0.8-2000	Trades Biome	[SPO] South Pacific Ocean	[SPSG] South Pacific Subtropical Gyre Province, North and South (MRGID:21486)	[SRF] surface water layer (ENVO:00010504)	2011-05-21T12:27	-2,0133	-84589	5,46	2011-05-22	06:52	23,87	35,02	190,82	6,73	0,32	0,75	408,12	381,22	8,20	5	0,60	https://ws.pangaea.de/dds-fdp/rest/panquery?datasetDOI=doi.pangaea.de/10.1594/PANGAEA.853810&filterParameterValue=1,TARA_N000001746	https://ws.pangaea.de/dds-fdp/rest/panquery?datasetDOI=doi.pangaea.de/10.1594/PANGAEA.858201&filterParameterValue=1,TARA_N000001746	https://ws.pangaea.de/dds-fdp/rest/panquery?datasetDOI=doi.pangaea.de/10.1594/PANGAEA.858207&filterParameterValue=1,TARA_N000001746	https://ws.pangaea.de/dds-fdp/rest/panquery?datasetDOI=doi.pangaea.de/10.1594/PANGAEA.842197&filterParameterValue=1,TARA_N000001746
TARA_N000001750	TARA_110	SEQ-(100L-or-15min)_W0.8-5	TARA_110_SRF_0.8-5	Trades Biome	[SPO] South Pacific Ocean	[SPSG] South Pacific Subtropical Gyre Province, North and South (MRGID:21486)	[SRF] surface water layer (ENVO:00010504)	2011-05-21T12:27	-2,0133	-84589	5,46	2011-05-22	06:52	23,87	35,02	190,82	6,73	0,32	0,75	408,12	381,22	8,20	5	0,60	https://ws.pangaea.de/dds-fdp/rest/panquery?datasetDOI=doi.pangaea.de/10.1594/PANGAEA.853810&filterParameterValue=1,TARA_N000001750	https://ws.pangaea.de/dds-fdp/rest/panquery?datasetDOI=doi.pangaea.de/10.1594/PANGAEA.858201&filterParameterValue=1,TARA_N000001750	https://ws.pangaea.de/dds-fdp/rest/panquery?datasetDOI=doi.pangaea.de/10.1594/PANGAEA.858207&filterParameterValue=1,TARA_N000001750	https://ws.pangaea.de/dds-fdp/rest/panquery?datasetDOI=doi.pangaea.de/10.1594/PANGAEA.842197&filterParameterValue=1,TARA_N000001750
TARA_N000001762	TARA_110	SEQ-(500mL-or-15min)_N180-2000	TARA_110_SRF_180-2000	Trades Biome	[SPO] South Pacific Ocean	[SPSG] South Pacific Subtropical Gyre Province, North and South (MRGID:21486)	[SRF] surface water layer (ENVO:00010504)	2011-05-21T16:07	-1,9389	-84611	5,46	2011-05-22	10:31	23,87	35,02	190,82	6,73	0,32	0,75	408,12	381,22	8,20	5	0,60	https://ws.pangaea.de/dds-fdp/rest/panquery?datasetDOI=doi.pangaea.de/10.1594/PANGAEA.853810&filterParameterValue=1,TARA_N000001762	https://ws.pangaea.de/dds-fdp/rest/panquery?datasetDOI=doi.pangaea.de/10.1594/PANGAEA.858201&filterParameterValue=1,TARA_N000001762	https://ws.pangaea.de/dds-fdp/rest/panquery?datasetDOI=doi.pangaea.de/10.1594/PANGAEA.858207&filterParameterValue=1,TARA_N000001762	https://ws.pangaea.de/dds-fdp/rest/panquery?datasetDOI=doi.pangaea.de/10.1594/PANGAEA.842197&filterParameterValue=1,TARA_N000001762
TARA_N000001758	TARA_110	SEQ-(500mL-or-15min)_N20-180	TARA_110_SRF_20-180	Trades Biome	[SPO] South Pacific Ocean	[SPSG] South Pacific Subtropical Gyre Province, North and South (MRGID:21486)	[SRF] surface water layer (ENVO:00010504)	2011-05-21T14:32	-1,9778	-84,5992	5,46	2011-05-22	08:57	23,87	35,02	190,82	6,73	0,32	0,75	408,12	381,22	8,20	5	0,60	https://ws.pangaea.de/dds-fdp/rest/panquery?datasetDOI=doi.pangaea.de/10.1594/PANGAEA.853810&filterParameterValue=1,TARA_N000001758	https://ws.pangaea.de/dds-fdp/rest/panquery?datasetDOI=doi.pangaea.de/10.1594/PANGAEA.858201&filterParameterValue=1,TARA_N000001758	https://ws.pangaea.de/dds-fdp/rest/panquery?datasetDOI=doi.pangaea.de/10.1594/PANGAEA.858207&filterParameterValue=1,TARA_N000001758	https://ws.pangaea.de/dds-fdp/rest/panquery?datasetDOI=doi.pangaea.de/10.1594/PANGAEA.842197&filterParameterValue=1,TARA_N000001758
TARA_N000001754	TARA_110	SEQ-(500mL-or-15min)_W5-20	TARA_110_SRF_5-20	Trades Biome	[SPO] South Pacific Ocean	[SPSG] South Pacific Subtropical Gyre Province, North and South (MRGID:21486)	[SRF] surface water layer (ENVO:00010504)	2011-05-21T12:27	-2,0133	-84589	5,46	2011-05-22	06:52	23,87	35,02	190,82	6,73	0,32	0,75	408,12	381,22	8,20	5	0,60	https://ws.pangaea.de/dds-fdp/rest/panquery?datasetDOI=doi.pangaea.de/10.1594/PANGAEA.853810&filterParameterValue=1,TARA_N000001754	https://ws.pangaea.de/dds-fdp/rest/panquery?datasetDOI=doi.pangaea.de/10.1594/PANGAEA.858201&filterParameterValue=1,TARA_N000001754	https://ws.pangaea.de/dds-fdp/rest/panquery?datasetDOI=doi.pangaea.de/10.1594/PANGAEA.858207&filterParameterValue=1,TARA_N000001754	https://ws.pangaea.de/dds-fdp/rest/panquery?datasetDOI=doi.pangaea.de/10.1594/PANGAEA.842197&filterParameterValue=1,TARA_N000001754
TARA_N000001814	TARA_111	SEQ-(100L-or-15min)_W>0.8	TARA_111_DCM_0.8-2000	Trades Biome	[SPO] South Pacific Ocean	[SPSG] South Pacific Subtropical Gyre Province, North and South (MRGID:21486)	[DCM] deep chlorophyll maximum layer (ENVO:01000326)	2011-05-31T20:28:10	-16,9587	-100,6751	90,47	2011-05-31	13:47	20,45	35,75	211,72	2,41	0,37	0,44	915,53	386,71	0,93	15	0,09	https://ws.pangaea.de/dds-fdp/rest/panquery?datasetDOI=doi.pangaea.de/10.1594/PANGAEA.853810&filterParameterValue=1,TARA_N000001814	https://ws.pangaea.de/dds-fdp/rest/panquery?datasetDOI=doi.pangaea.de/10.1594/PANGAEA.858201&filterParameterValue=1,TARA_N000001814	https://ws.pangaea.de/dds-fdp/rest/panquery?datasetDOI=doi.pangaea.de/10.1594/PANGAEA.858207&filterParameterValue=1,TARA_N000001814	https://ws.pangaea.de/dds-fdp/rest/panquery?datasetDOI=doi.pangaea.de/10.1594/PANGAEA.842197&filterParameterValue=1,TARA_N000001814
TARA_N000001816	TARA_111	SEQ-(100L-or-15min)_W0.8-5	TARA_111_DCM_0.8-5	Trades Biome	[SPO] South Pacific Ocean	[SPSG] South Pacific Subtropical Gyre Province, North and South (MRGID:21486)	[DCM] deep chlorophyll maximum layer (ENVO:01000326)	2011-05-31T20:28:10	-16,9587	-100,6751	90,47	2011-05-31	13:47	20,45	35,75	211,72	2,41	0,37	0,44	915,53	386,71	0,93	15	0,09	https://ws.pangaea.de/dds-fdp/rest/panquery?datasetDOI=doi.pangaea.de/10.1594/PANGAEA.853810&filterParameterValue=1,TARA_N000001816	https://ws.pangaea.de/dds-fdp/rest/panquery?datasetDOI=doi.pangaea.de/10.1594/PANGAEA.858201&filterParameterValue=1,TARA_N000001816	https://ws.pangaea.de/dds-fdp/rest/panquery?datasetDOI=doi.pangaea.de/10.1594/PANGAEA.858207&filterParameterValue=1,TARA_N000001816	https://ws.pangaea.de/dds-fdp/rest/panquery?datasetDOI=doi.pangaea.de/10.1594/PANGAEA.842197&filterParameterValue=1,TARA_N000001816
TARA_N000001828	TARA_111	SEQ-(500mL-or-15min)_N180-2000	TARA_111_DCM_180-2000	Trades Biome	[SPO] South Pacific Ocean	[SPSG] South Pacific Subtropical Gyre Province, North and South (MRGID:21486)	[DCM] deep chlorophyll maximum layer (ENVO:01000326)	2011-06-01T21:56	-16,9741	-100,6683	90,47	2011-06-01	15:15	20,45	35,75	211,72	2,41	0,37	0,44	915,53	386,71	0,93	15	0,09	https://ws.pangaea.de/dds-fdp/rest/panquery?datasetDOI=doi.pangaea.de/10.1594/PANGAEA.853810&filterParameterValue=1,TARA_N000001828	https://ws.pangaea.de/dds-fdp/rest/panquery?datasetDOI=doi.pangaea.de/10.1594/PANGAEA.858201&filterParameterValue=1,TARA_N000001828	https://ws.pangaea.de/dds-fdp/rest/panquery?datasetDOI=doi.pangaea.de/10.1594/PANGAEA.858207&filterParameterValue=1,TARA_N000001828	https://ws.pangaea.de/dds-fdp/rest/panquery?datasetDOI=doi.pangaea.de/10.1594/PANGAEA.842197&filterParameterValue=1,TARA_N000001828
TARA_N000001824	TARA_111	SEQ-(500mL-or-15min)_N20-180	TARA_111_DCM_20-180	Trades Biome	[SPO] South Pacific Ocean	[SPSG] South Pacific Subtropical Gyre Province, North and South (MRGID:21486)	[DCM] deep chlorophyll maximum layer (ENVO:01000326)	2011-06-01T22:20	-16,9763	-100,6794	90,47	2011-06-01	15:39	20,45	35,75	211,72	2,41	0,37	0,44	915,53	386,71	0,93	15	0,09	https://ws.pangaea.de/dds-fdp/rest/panquery?datasetDOI=doi.pangaea.de/10.1594/PANGAEA.853810&filterParameterValue=1,TARA_N000001824	https://ws.pangaea.de/dds-fdp/rest/panquery?datasetDOI=doi.pangaea.de/10.1594/PANGAEA.858201&filterParameterValue=1,TARA_N000001824	https://ws.pangaea.de/dds-fdp/rest/panquery?datasetDOI=doi.pangaea.de/10.1594/PANGAEA.858207&filterParameterValue=1,TARA_N000001824	https://ws.pangaea.de/dds-fdp/rest/panquery?datasetDOI=doi.pangaea.de/10.1594/PANGAEA.842197&filterParameterValue=1,TARA_N000001824
TARA_N000001820	TARA_111	SEQ-(500mL-or-15min)_W5-20	TARA_111_DCM_5-20	Trades Biome	[SPO] South Pacific Ocean	[SPSG] South Pacific Subtropical Gyre Province, North and South (MRGID:21486)	[DCM] deep chlorophyll maximum layer (ENVO:01000326)	2011-05-31T20:28:10	-16,9587	-100,6751	90,47	2011-05-31	13:47	20,45	35,75	211,72	2,41	0,37	0,44	915,53	386,71	0,93	15	0,09	https://ws.pangaea.de/dds-fdp/rest/panquery?datasetDOI=doi.pangaea.de/10.1594/PANGAEA.853810&filterParameterValue=1,TARA_N000001820	https://ws.pangaea.de/dds-fdp/rest/panquery?datasetDOI=doi.pangaea.de/10.1594/PANGAEA.858201&filterParameterValue=1,TARA_N000001820	https://ws.pangaea.de/dds-fdp/rest/panquery?datasetDOI=doi.pangaea.de/10.1594/PANGAEA.858207&filterParameterValue=1,TARA_N000001820	https://ws.pangaea.de/dds-fdp/rest/panquery?datasetDOI=doi.pangaea.de/10.1594/PANGAEA.842197&filterParameterValue=1,TARA_N000001820
TARA_N000001810	TARA_111	SEQ-(100L-or-15min)_W>0.8	TARA_111_SRF_0.8-2000	Trades Biome	[SPO] South Pacific Ocean	[SPSG] South Pacific Subtropical Gyre Province, North and South (MRGID:21486)	[SRF] surface water layer (ENVO:00010504)	2011-05-31T14:25	-16,9601	-100,6335	5,44	2011-06-01	07:44	22,76	35,99	209,23	2,60	0,07	0,50	915,53	396,76	2,68	3	0,20	https://ws.pangaea.de/dds-fdp/rest/panquery?datasetDOI=doi.pangaea.de/10.1594/PANGAEA.853810&filterParameterValue=1,TARA_N000001810	https://ws.pangaea.de/dds-fdp/rest/panquery?datasetDOI=doi.pangaea.de/10.1594/PANGAEA.858201&filterParameterValue=1,TARA_N000001810	https://ws.pangaea.de/dds-fdp/rest/panquery?datasetDOI=doi.pangaea.de/10.1594/PANGAEA.858207&filterParameterValue=1,TARA_N000001810	https://ws.pangaea.de/dds-fdp/rest/panquery?datasetDOI=doi.pangaea.de/10.1594/PANGAEA.842197&filterParameterValue=1,TARA_N000001810
TARA_N000001812	TARA_111	SEQ-(100L-or-15min)_W0.8-5	TARA_111_SRF_0.8-5	Trades Biome	[SPO] South Pacific Ocean	[SPSG] South Pacific Subtropical Gyre Province, North and South (MRGID:21486)	[SRF] surface water layer (ENVO:00010504)	2011-05-31T14:25	-16,9601	-100,6335	5,44	2011-06-01	07:44	22,76	35,99	209,23	2,60	0,07	0,50	915,53	396,76	2,68	3	0,20	https://ws.pangaea.de/dds-fdp/rest/panquery?datasetDOI=doi.pangaea.de/10.1594/PANGAEA.853810&filterParameterValue=1,TARA_N000001812	https://ws.pangaea.de/dds-fdp/rest/panquery?datasetDOI=doi.pangaea.de/10.1594/PANGAEA.858201&filterParameterValue=1,TARA_N000001812	https://ws.pangaea.de/dds-fdp/rest/panquery?datasetDOI=doi.pangaea.de/10.1594/PANGAEA.858207&filterParameterValue=1,TARA_N000001812	https://ws.pangaea.de/dds-fdp/rest/panquery?datasetDOI=doi.pangaea.de/10.1594/PANGAEA.842197&filterParameterValue=1,TARA_N000001812
TARA_N000001826	TARA_111	SEQ-(500mL-or-15min)_N180-2000	TARA_111_SRF_180-2000	Trades Biome	[SPO] South Pacific Ocean	[SPSG] South Pacific Subtropical Gyre Province, North and South (MRGID:21486)	[SRF] surface water layer (ENVO:00010504)	2011-05-31T17:08	-16,9554	-100,6911	5,44	2011-06-01	10:27	22,76	35,99	209,23	2,60	0,07	0,50	915,53	396,76	2,68	3	0,20	https://ws.pangaea.de/dds-fdp/rest/panquery?datasetDOI=doi.pangaea.de/10.1594/PANGAEA.853810&filterParameterValue=1,TARA_N000001826	https://ws.pangaea.de/dds-fdp/rest/panquery?datasetDOI=doi.pangaea.de/10.1594/PANGAEA.858201&filterParameterValue=1,TARA_N000001826	https://ws.pangaea.de/dds-fdp/rest/panquery?datasetDOI=doi.pangaea.de/10.1594/PANGAEA.858207&filterParameterValue=1,TARA_N000001826	https://ws.pangaea.de/dds-fdp/rest/panquery?datasetDOI=doi.pangaea.de/10.1594/PANGAEA.842197&filterParameterValue=1,TARA_N000001826
TARA_N000001823	TARA_111	SEQ-(500mL-or-15min)_N20-180	TARA_111_SRF_20-180	Trades Biome	[SPO] South Pacific Ocean	[SPSG] South Pacific Subtropical Gyre Province, North and South (MRGID:21486)	[SRF] surface water layer (ENVO:00010504)	2011-05-31T15:41	-16,9581	-100,6588	5,44	2011-06-01	09:00	22,76	35,99	209,23	2,60	0,07	0,50	915,53	396,76	2,68	3	0,20	https://ws.pangaea.de/dds-fdp/rest/panquery?datasetDOI=doi.pangaea.de/10.1594/PANGAEA.853810&filterParameterValue=1,TARA_N000001823	https://ws.pangaea.de/dds-fdp/rest/panquery?datasetDOI=doi.pangaea.de/10.1594/PANGAEA.858201&filterParameterValue=1,TARA_N000001823	https://ws.pangaea.de/dds-fdp/rest/panquery?datasetDOI=doi.pangaea.de/10.1594/PANGAEA.858207&filterParameterValue=1,TARA_N000001823	https://ws.pangaea.de/dds-fdp/rest/panquery?datasetDOI=doi.pangaea.de/10.1594/PANGAEA.842197&filterParameterValue=1,TARA_N000001823
TARA_N000001937	TARA_122	SEQ-(100L-or-15min)_W>0.8	TARA_122_SRF_0.8-2000	Trades Biome	[SPO] South Pacific Ocean	[SPSG] South Pacific Subtropical Gyre Province, North and South (MRGID:21486)	[SRF] surface water layer (ENVO:00010504)	2011-07-26T17:10	-8,9971	-139,1963	5,47	2011-07-27	07:46	26,56	35,36	186,98	5,95	0,14	0,57	31,52	299,10	5,46	3	0,20	https://ws.pangaea.de/dds-fdp/rest/panquery?datasetDOI=doi.pangaea.de/10.1594/PANGAEA.853810&filterParameterValue=1,TARA_N000001937	https://ws.pangaea.de/dds-fdp/rest/panquery?datasetDOI=doi.pangaea.de/10.1594/PANGAEA.858201&filterParameterValue=1,TARA_N000001937	https://ws.pangaea.de/dds-fdp/rest/panquery?datasetDOI=doi.pangaea.de/10.1594/PANGAEA.858207&filterParameterValue=1,TARA_N000001937	https://ws.pangaea.de/dds-fdp/rest/panquery?datasetDOI=doi.pangaea.de/10.1594/PANGAEA.842197&filterParameterValue=1,TARA_N000001937
TARA_N000001938	TARA_122	SEQ-(100L-or-15min)_W0.8-5	TARA_122_SRF_0.8-5	Trades Biome	[SPO] South Pacific Ocean	[SPSG] South Pacific Subtropical Gyre Province, North and South (MRGID:21486)	[SRF] surface water layer (ENVO:00010504)	2011-07-26T17:10	-8,9971	-139,1963	5,47	2011-07-27	07:46	26,56	35,36	186,98	5,95	0,14	0,57	31,52	299,10	5,46	3	0,20	https://ws.pangaea.de/dds-fdp/rest/panquery?datasetDOI=doi.pangaea.de/10.1594/PANGAEA.853810&filterParameterValue=1,TARA_N000001938	https://ws.pangaea.de/dds-fdp/rest/panquery?datasetDOI=doi.pangaea.de/10.1594/PANGAEA.858201&filterParameterValue=1,TARA_N000001938	https://ws.pangaea.de/dds-fdp/rest/panquery?datasetDOI=doi.pangaea.de/10.1594/PANGAEA.858207&filterParameterValue=1,TARA_N000001938	https://ws.pangaea.de/dds-fdp/rest/panquery?datasetDOI=doi.pangaea.de/10.1594/PANGAEA.842197&filterParameterValue=1,TARA_N000001938
TARA_N000001942	TARA_122	SEQ-(500mL-or-15min)_N180-2000	TARA_122_SRF_180-2000	Trades Biome	[SPO] South Pacific Ocean	[SPSG] South Pacific Subtropical Gyre Province, North and South (MRGID:21486)	[SRF] surface water layer (ENVO:00010504)	2011-07-26T21:42	-8,9948	-139,2172	5,47	2011-07-26	12:18	26,56	35,36	186,98	5,95	0,14	0,57	31,52	299,10	5,46	3	0,20	https://ws.pangaea.de/dds-fdp/rest/panquery?datasetDOI=doi.pangaea.de/10.1594/PANGAEA.853810&filterParameterValue=1,TARA_N000001942	https://ws.pangaea.de/dds-fdp/rest/panquery?datasetDOI=doi.pangaea.de/10.1594/PANGAEA.858201&filterParameterValue=1,TARA_N000001942	https://ws.pangaea.de/dds-fdp/rest/panquery?datasetDOI=doi.pangaea.de/10.1594/PANGAEA.858207&filterParameterValue=1,TARA_N000001942	https://ws.pangaea.de/dds-fdp/rest/panquery?datasetDOI=doi.pangaea.de/10.1594/PANGAEA.842197&filterParameterValue=1,TARA_N000001942
TARA_N000001941	TARA_122	SEQ-(500mL-or-15min)_N20-180	TARA_122_SRF_20-180	Trades Biome	[SPO] South Pacific Ocean	[SPSG] South Pacific Subtropical Gyre Province, North and South (MRGID:21486)	[SRF] surface water layer (ENVO:00010504)	2011-07-26T23:30	-9006	-139206	5,47	2011-07-26	14:06	26,56	35,36	186,98	5,95	0,14	0,57	31,52	299,10	5,46	3	0,20	https://ws.pangaea.de/dds-fdp/rest/panquery?datasetDOI=doi.pangaea.de/10.1594/PANGAEA.853810&filterParameterValue=1,TARA_N000001941	https://ws.pangaea.de/dds-fdp/rest/panquery?datasetDOI=doi.pangaea.de/10.1594/PANGAEA.858201&filterParameterValue=1,TARA_N000001941	https://ws.pangaea.de/dds-fdp/rest/panquery?datasetDOI=doi.pangaea.de/10.1594/PANGAEA.858207&filterParameterValue=1,TARA_N000001941	https://ws.pangaea.de/dds-fdp/rest/panquery?datasetDOI=doi.pangaea.de/10.1594/PANGAEA.842197&filterParameterValue=1,TARA_N000001941
TARA_N000001943	TARA_122	SEQ-(500mL-or-15min)_N5-20	TARA_122_SRF_5-20	Trades Biome	[SPO] South Pacific Ocean	[SPSG] South Pacific Subtropical Gyre Province, North and South (MRGID:21486)	[SRF] surface water layer (ENVO:00010504)	2011-07-27T01:27	-8996	-139,2815	5,47	2011-07-27	16:03	26,56	35,36	186,98	5,95	0,14	0,57	31,52	299,10	5,46	3	0,20	https://ws.pangaea.de/dds-fdp/rest/panquery?datasetDOI=doi.pangaea.de/10.1594/PANGAEA.853810&filterParameterValue=1,TARA_N000001943	https://ws.pangaea.de/dds-fdp/rest/panquery?datasetDOI=doi.pangaea.de/10.1594/PANGAEA.858201&filterParameterValue=1,TARA_N000001943	https://ws.pangaea.de/dds-fdp/rest/panquery?datasetDOI=doi.pangaea.de/10.1594/PANGAEA.858207&filterParameterValue=1,TARA_N000001943	https://ws.pangaea.de/dds-fdp/rest/panquery?datasetDOI=doi.pangaea.de/10.1594/PANGAEA.842197&filterParameterValue=1,TARA_N000001943
TARA_N000001972	TARA_123	SEQ-(100L-or-15min)_W>0.8	TARA_123_SRF_0.8-2000	Trades Biome	[SPO] South Pacific Ocean	[SPSG] South Pacific Subtropical Gyre Province, North and South (MRGID:21486)	[SRF] surface water layer (ENVO:00010504)	2011-07-31T17:20	-8,9068	-140283	5,90	2011-08-01	07:52	26,64	35,36	189,81	5,32	0,16	0,53	6,18	405,41	4,90	0	0,19	https://ws.pangaea.de/dds-fdp/rest/panquery?datasetDOI=doi.pangaea.de/10.1594/PANGAEA.853810&filterParameterValue=1,TARA_N000001972	https://ws.pangaea.de/dds-fdp/rest/panquery?datasetDOI=doi.pangaea.de/10.1594/PANGAEA.858201&filterParameterValue=1,TARA_N000001972	https://ws.pangaea.de/dds-fdp/rest/panquery?datasetDOI=doi.pangaea.de/10.1594/PANGAEA.858207&filterParameterValue=1,TARA_N000001972	https://ws.pangaea.de/dds-fdp/rest/panquery?datasetDOI=doi.pangaea.de/10.1594/PANGAEA.842197&filterParameterValue=1,TARA_N000001972
TARA_N000001992	TARA_123	SEQ-(100L-or-15min)_W0.8-5	TARA_123_SRF_0.8-5	Trades Biome	[SPO] South Pacific Ocean	[SPSG] South Pacific Subtropical Gyre Province, North and South (MRGID:21486)	[SRF] surface water layer (ENVO:00010504)	2011-07-31T17:20	-8,9068	-140283	5,90	2011-08-01	07:52	26,64	35,36	189,81	5,32	0,16	0,53	6,18	405,41	4,90	0	0,19	https://ws.pangaea.de/dds-fdp/rest/panquery?datasetDOI=doi.pangaea.de/10.1594/PANGAEA.853810&filterParameterValue=1,TARA_N000001992	https://ws.pangaea.de/dds-fdp/rest/panquery?datasetDOI=doi.pangaea.de/10.1594/PANGAEA.858201&filterParameterValue=1,TARA_N000001992	https://ws.pangaea.de/dds-fdp/rest/panquery?datasetDOI=doi.pangaea.de/10.1594/PANGAEA.858207&filterParameterValue=1,TARA_N000001992	https://ws.pangaea.de/dds-fdp/rest/panquery?datasetDOI=doi.pangaea.de/10.1594/PANGAEA.842197&filterParameterValue=1,TARA_N000001992
TARA_N000001998	TARA_123	SEQ-(500mL-or-15min)_N180-2000	TARA_123_SRF_180-2000	Trades Biome	[SPO] South Pacific Ocean	[SPSG] South Pacific Subtropical Gyre Province, North and South (MRGID:21486)	[SRF] surface water layer (ENVO:00010504)	2011-07-31T20:41	-8,8932	-140,2879	5,90	2011-08-01	11:13	26,64	35,36	189,81	5,32	0,16	0,53	6,18	405,41	4,90	0	0,19	https://ws.pangaea.de/dds-fdp/rest/panquery?datasetDOI=doi.pangaea.de/10.1594/PANGAEA.853810&filterParameterValue=1,TARA_N000001998	https://ws.pangaea.de/dds-fdp/rest/panquery?datasetDOI=doi.pangaea.de/10.1594/PANGAEA.858201&filterParameterValue=1,TARA_N000001998	https://ws.pangaea.de/dds-fdp/rest/panquery?datasetDOI=doi.pangaea.de/10.1594/PANGAEA.858207&filterParameterValue=1,TARA_N000001998	https://ws.pangaea.de/dds-fdp/rest/panquery?datasetDOI=doi.pangaea.de/10.1594/PANGAEA.842197&filterParameterValue=1,TARA_N000001998
TARA_N000001996	TARA_123	SEQ-(500mL-or-15min)_N20-180	TARA_123_SRF_20-180	Trades Biome	[SPO] South Pacific Ocean	[SPSG] South Pacific Subtropical Gyre Province, North and South (MRGID:21486)	[SRF] surface water layer (ENVO:00010504)	2011-07-31T23:07	-8,9056	-140,2792	5,90	2011-07-31	13:39	26,64	35,36	189,81	5,32	0,16	0,53	6,18	405,41	4,90	0	0,19	https://ws.pangaea.de/dds-fdp/rest/panquery?datasetDOI=doi.pangaea.de/10.1594/PANGAEA.853810&filterParameterValue=1,TARA_N000001996	https://ws.pangaea.de/dds-fdp/rest/panquery?datasetDOI=doi.pangaea.de/10.1594/PANGAEA.858201&filterParameterValue=1,TARA_N000001996	https://ws.pangaea.de/dds-fdp/rest/panquery?datasetDOI=doi.pangaea.de/10.1594/PANGAEA.858207&filterParameterValue=1,TARA_N000001996	https://ws.pangaea.de/dds-fdp/rest/panquery?datasetDOI=doi.pangaea.de/10.1594/PANGAEA.842197&filterParameterValue=1,TARA_N000001996
TARA_N000001994	TARA_123	SEQ-(500mL-or-15min)_N5-20	TARA_123_SRF_5-20	Trades Biome	[SPO] South Pacific Ocean	[SPSG] South Pacific Subtropical Gyre Province, North and South (MRGID:21486)	[SRF] surface water layer (ENVO:00010504)	2011-07-31T19:16	-8,8984	-140,3089	5,90	2011-08-01	09:48	26,64	35,36	189,81	5,32	0,16	0,53	6,18	405,41	4,90	0	0,19	https://ws.pangaea.de/dds-fdp/rest/panquery?datasetDOI=doi.pangaea.de/10.1594/PANGAEA.853810&filterParameterValue=1,TARA_N000001994	https://ws.pangaea.de/dds-fdp/rest/panquery?datasetDOI=doi.pangaea.de/10.1594/PANGAEA.858201&filterParameterValue=1,TARA_N000001994	https://ws.pangaea.de/dds-fdp/rest/panquery?datasetDOI=doi.pangaea.de/10.1594/PANGAEA.858207&filterParameterValue=1,TARA_N000001994	https://ws.pangaea.de/dds-fdp/rest/panquery?datasetDOI=doi.pangaea.de/10.1594/PANGAEA.842197&filterParameterValue=1,TARA_N000001994
TARA_N000002036	TARA_124	SEQ-(100L-or-15min)_W>0.8	TARA_124_SRF_0.8-2000	Trades Biome	[SPO] South Pacific Ocean	[SPSG] South Pacific Subtropical Gyre Province, North and South (MRGID:21486)	[SRF] surface water layer (ENVO:00010504)	2011-08-04T18:33	-9,1504	-140,5216	5,44	2011-08-05	09:04	26,52	35,38	190,79	5,05	0,26	0,63	44,41	568,24	6,18	3	0,16	https://ws.pangaea.de/dds-fdp/rest/panquery?datasetDOI=doi.pangaea.de/10.1594/PANGAEA.853810&filterParameterValue=1,TARA_N000002036	https://ws.pangaea.de/dds-fdp/rest/panquery?datasetDOI=doi.pangaea.de/10.1594/PANGAEA.858201&filterParameterValue=1,TARA_N000002036	https://ws.pangaea.de/dds-fdp/rest/panquery?datasetDOI=doi.pangaea.de/10.1594/PANGAEA.858207&filterParameterValue=1,TARA_N000002036	https://ws.pangaea.de/dds-fdp/rest/panquery?datasetDOI=doi.pangaea.de/10.1594/PANGAEA.842197&filterParameterValue=1,TARA_N000002036
TARA_N000002037	TARA_124	SEQ-(100L-or-15min)_W0.8-5	TARA_124_SRF_0.8-5	Trades Biome	[SPO] South Pacific Ocean	[SPSG] South Pacific Subtropical Gyre Province, North and South (MRGID:21486)	[SRF] surface water layer (ENVO:00010504)	2011-08-04T18:33	-9,1504	-140,5216	5,44	2011-08-05	09:04	26,52	35,38	190,79	5,05	0,26	0,63	44,41	568,24	6,18	3	0,16	https://ws.pangaea.de/dds-fdp/rest/panquery?datasetDOI=doi.pangaea.de/10.1594/PANGAEA.853810&filterParameterValue=1,TARA_N000002037	https://ws.pangaea.de/dds-fdp/rest/panquery?datasetDOI=doi.pangaea.de/10.1594/PANGAEA.858201&filterParameterValue=1,TARA_N000002037	https://ws.pangaea.de/dds-fdp/rest/panquery?datasetDOI=doi.pangaea.de/10.1594/PANGAEA.858207&filterParameterValue=1,TARA_N000002037	https://ws.pangaea.de/dds-fdp/rest/panquery?datasetDOI=doi.pangaea.de/10.1594/PANGAEA.842197&filterParameterValue=1,TARA_N000002037
TARA_N000002043	TARA_124	SEQ-(500mL-or-15min)_N180-2000	TARA_124_SRF_180-2000	Trades Biome	[SPO] South Pacific Ocean	[SPSG] South Pacific Subtropical Gyre Province, North and South (MRGID:21486)	[SRF] surface water layer (ENVO:00010504)	2011-08-04T21:27	-9,1508	-140,4969	5,44	2011-08-05	11:58	26,52	35,38	190,79	5,05	0,26	0,63	44,41	568,24	6,18	3	0,16	https://ws.pangaea.de/dds-fdp/rest/panquery?datasetDOI=doi.pangaea.de/10.1594/PANGAEA.853810&filterParameterValue=1,TARA_N000002043	https://ws.pangaea.de/dds-fdp/rest/panquery?datasetDOI=doi.pangaea.de/10.1594/PANGAEA.858201&filterParameterValue=1,TARA_N000002043	https://ws.pangaea.de/dds-fdp/rest/panquery?datasetDOI=doi.pangaea.de/10.1594/PANGAEA.858207&filterParameterValue=1,TARA_N000002043	https://ws.pangaea.de/dds-fdp/rest/panquery?datasetDOI=doi.pangaea.de/10.1594/PANGAEA.842197&filterParameterValue=1,TARA_N000002043
TARA_N000002041	TARA_124	SEQ-(500mL-or-15min)_N20-180	TARA_124_SRF_20-180	Trades Biome	[SPO] South Pacific Ocean	[SPSG] South Pacific Subtropical Gyre Province, North and South (MRGID:21486)	[SRF] surface water layer (ENVO:00010504)	2011-08-05T01:13	-9,1463	-140515	5,44	2011-08-05	15:44	26,52	35,38	190,79	5,05	0,26	0,63	44,41	568,24	6,18	3	0,16	https://ws.pangaea.de/dds-fdp/rest/panquery?datasetDOI=doi.pangaea.de/10.1594/PANGAEA.853810&filterParameterValue=1,TARA_N000002041	https://ws.pangaea.de/dds-fdp/rest/panquery?datasetDOI=doi.pangaea.de/10.1594/PANGAEA.858201&filterParameterValue=1,TARA_N000002041	https://ws.pangaea.de/dds-fdp/rest/panquery?datasetDOI=doi.pangaea.de/10.1594/PANGAEA.858207&filterParameterValue=1,TARA_N000002041	https://ws.pangaea.de/dds-fdp/rest/panquery?datasetDOI=doi.pangaea.de/10.1594/PANGAEA.842197&filterParameterValue=1,TARA_N000002041
TARA_N000002039	TARA_124	SEQ-(500mL-or-15min)_W5-20	TARA_124_SRF_5-20	Trades Biome	[SPO] South Pacific Ocean	[SPSG] South Pacific Subtropical Gyre Province, North and South (MRGID:21486)	[SRF] surface water layer (ENVO:00010504)	2011-08-04T18:33	-9,1504	-140,5216	5,44	2011-08-05	09:04	26,52	35,38	190,79	5,05	0,26	0,63	44,41	568,24	6,18	3	0,16	https://ws.pangaea.de/dds-fdp/rest/panquery?datasetDOI=doi.pangaea.de/10.1594/PANGAEA.853810&filterParameterValue=1,TARA_N000002039	https://ws.pangaea.de/dds-fdp/rest/panquery?datasetDOI=doi.pangaea.de/10.1594/PANGAEA.858201&filterParameterValue=1,TARA_N000002039	https://ws.pangaea.de/dds-fdp/rest/panquery?datasetDOI=doi.pangaea.de/10.1594/PANGAEA.858207&filterParameterValue=1,TARA_N000002039	https://ws.pangaea.de/dds-fdp/rest/panquery?datasetDOI=doi.pangaea.de/10.1594/PANGAEA.842197&filterParameterValue=1,TARA_N000002039
TARA_N000002017	TARA_125	SEQ-(100L-or-15min)_W>0.8	TARA_125_SRF_0.8-2000	Trades Biome	[SPO] South Pacific Ocean	[SPSG] South Pacific Subtropical Gyre Province, North and South (MRGID:21486)	[SRF] surface water layer (ENVO:00010504)	2011-08-08T17:33	-8,9111	-142,5571	5,38	2011-08-09	07:57	26,87	35,42	187,79	6,03	0,12	0,56	228,58	424,31	3,73	2	0,18	https://ws.pangaea.de/dds-fdp/rest/panquery?datasetDOI=doi.pangaea.de/10.1594/PANGAEA.853810&filterParameterValue=1,TARA_N000002017	https://ws.pangaea.de/dds-fdp/rest/panquery?datasetDOI=doi.pangaea.de/10.1594/PANGAEA.858201&filterParameterValue=1,TARA_N000002017	https://ws.pangaea.de/dds-fdp/rest/panquery?datasetDOI=doi.pangaea.de/10.1594/PANGAEA.858207&filterParameterValue=1,TARA_N000002017	https://ws.pangaea.de/dds-fdp/rest/panquery?datasetDOI=doi.pangaea.de/10.1594/PANGAEA.842197&filterParameterValue=1,TARA_N000002017
TARA_N000002019	TARA_125	SEQ-(100L-or-15min)_W0.8-5	TARA_125_SRF_0.8-5	Trades Biome	[SPO] South Pacific Ocean	[SPSG] South Pacific Subtropical Gyre Province, North and South (MRGID:21486)	[SRF] surface water layer (ENVO:00010504)	2011-08-08T17:33	-8,9111	-142,5571	5,38	2011-08-09	07:57	26,87	35,42	187,79	6,03	0,12	0,56	228,58	424,31	3,73	2	0,18	https://ws.pangaea.de/dds-fdp/rest/panquery?datasetDOI=doi.pangaea.de/10.1594/PANGAEA.853810&filterParameterValue=1,TARA_N000002019	https://ws.pangaea.de/dds-fdp/rest/panquery?datasetDOI=doi.pangaea.de/10.1594/PANGAEA.858201&filterParameterValue=1,TARA_N000002019	https://ws.pangaea.de/dds-fdp/rest/panquery?datasetDOI=doi.pangaea.de/10.1594/PANGAEA.858207&filterParameterValue=1,TARA_N000002019	https://ws.pangaea.de/dds-fdp/rest/panquery?datasetDOI=doi.pangaea.de/10.1594/PANGAEA.842197&filterParameterValue=1,TARA_N000002019
TARA_N000002025	TARA_125	SEQ-(500mL-or-15min)_N180-2000	TARA_125_SRF_180-2000	Trades Biome	[SPO] South Pacific Ocean	[SPSG] South Pacific Subtropical Gyre Province, North and South (MRGID:21486)	[SRF] surface water layer (ENVO:00010504)	2011-08-08T20:16	-8892	-142,6358	5,38	2011-08-09	10:39	26,87	35,42	187,79	6,03	0,12	0,56	228,58	424,31	3,73	2	0,18	https://ws.pangaea.de/dds-fdp/rest/panquery?datasetDOI=doi.pangaea.de/10.1594/PANGAEA.853810&filterParameterValue=1,TARA_N000002025	https://ws.pangaea.de/dds-fdp/rest/panquery?datasetDOI=doi.pangaea.de/10.1594/PANGAEA.858201&filterParameterValue=1,TARA_N000002025	https://ws.pangaea.de/dds-fdp/rest/panquery?datasetDOI=doi.pangaea.de/10.1594/PANGAEA.858207&filterParameterValue=1,TARA_N000002025	https://ws.pangaea.de/dds-fdp/rest/panquery?datasetDOI=doi.pangaea.de/10.1594/PANGAEA.842197&filterParameterValue=1,TARA_N000002025
TARA_N000002024	TARA_125	SEQ-(500mL-or-15min)_N20-180	TARA_125_SRF_20-180	Trades Biome	[SPO] South Pacific Ocean	[SPSG] South Pacific Subtropical Gyre Province, North and South (MRGID:21486)	[SRF] surface water layer (ENVO:00010504)	2011-08-08T21:50	-8894	-142631	5,38	2011-08-08	12:13	26,87	35,42	187,79	6,03	0,12	0,56	228,58	424,31	3,73	2	0,18	https://ws.pangaea.de/dds-fdp/rest/panquery?datasetDOI=doi.pangaea.de/10.1594/PANGAEA.853810&filterParameterValue=1,TARA_N000002024	https://ws.pangaea.de/dds-fdp/rest/panquery?datasetDOI=doi.pangaea.de/10.1594/PANGAEA.858201&filterParameterValue=1,TARA_N000002024	https://ws.pangaea.de/dds-fdp/rest/panquery?datasetDOI=doi.pangaea.de/10.1594/PANGAEA.858207&filterParameterValue=1,TARA_N000002024	https://ws.pangaea.de/dds-fdp/rest/panquery?datasetDOI=doi.pangaea.de/10.1594/PANGAEA.842197&filterParameterValue=1,TARA_N000002024
TARA_N000002021	TARA_125	SEQ-(500mL-or-15min)_N5-20	TARA_125_SRF_5-20	Trades Biome	[SPO] South Pacific Ocean	[SPSG] South Pacific Subtropical Gyre Province, North and South (MRGID:21486)	[SRF] surface water layer (ENVO:00010504)	2011-08-08T23:43	-8,9124	-142,5595	5,38	2011-08-08	14:07	26,87	35,42	187,79	6,03	0,12	0,56	228,58	424,31	3,73	2	0,18	https://ws.pangaea.de/dds-fdp/rest/panquery?datasetDOI=doi.pangaea.de/10.1594/PANGAEA.853810&filterParameterValue=1,TARA_N000002021	https://ws.pangaea.de/dds-fdp/rest/panquery?datasetDOI=doi.pangaea.de/10.1594/PANGAEA.858201&filterParameterValue=1,TARA_N000002021	https://ws.pangaea.de/dds-fdp/rest/panquery?datasetDOI=doi.pangaea.de/10.1594/PANGAEA.858207&filterParameterValue=1,TARA_N000002021	https://ws.pangaea.de/dds-fdp/rest/panquery?datasetDOI=doi.pangaea.de/10.1594/PANGAEA.842197&filterParameterValue=1,TARA_N000002021
TARA_N000002287	TARA_128	SEQ-(100L-or-15min)_W>0.8	TARA_128_DCM_0.8-2000	Trades Biome	[NPO] North Pacific Ocean	[PEOD] Pacific Equatorial Divergence Province (MRGID:21489)	[DCM] deep chlorophyll maximum layer (ENVO:01000326)	2011-09-05T18:40	0,0222	-153,6858	39,22	2011-09-06	08:26	26,08	35,13	177,24	4,23	0,44	0,55	446,41	430,88	5,26	4	0,12	https://ws.pangaea.de/dds-fdp/rest/panquery?datasetDOI=doi.pangaea.de/10.1594/PANGAEA.853810&filterParameterValue=1,TARA_N000002287	https://ws.pangaea.de/dds-fdp/rest/panquery?datasetDOI=doi.pangaea.de/10.1594/PANGAEA.858201&filterParameterValue=1,TARA_N000002287	https://ws.pangaea.de/dds-fdp/rest/panquery?datasetDOI=doi.pangaea.de/10.1594/PANGAEA.858207&filterParameterValue=1,TARA_N000002287	https://ws.pangaea.de/dds-fdp/rest/panquery?datasetDOI=doi.pangaea.de/10.1594/PANGAEA.842197&filterParameterValue=1,TARA_N000002287
TARA_N000002291	TARA_128	SEQ-(100L-or-15min)_W0.8-5	TARA_128_DCM_0.8-5	Trades Biome	[NPO] North Pacific Ocean	[PEOD] Pacific Equatorial Divergence Province (MRGID:21489)	[DCM] deep chlorophyll maximum layer (ENVO:01000326)	2011-09-05T18:40	0,0222	-153,6858	39,22	2011-09-06	08:26	26,08	35,13	177,24	4,23	0,44	0,55	446,41	430,88	5,26	4	0,12	https://ws.pangaea.de/dds-fdp/rest/panquery?datasetDOI=doi.pangaea.de/10.1594/PANGAEA.853810&filterParameterValue=1,TARA_N000002291	https://ws.pangaea.de/dds-fdp/rest/panquery?datasetDOI=doi.pangaea.de/10.1594/PANGAEA.858201&filterParameterValue=1,TARA_N000002291	https://ws.pangaea.de/dds-fdp/rest/panquery?datasetDOI=doi.pangaea.de/10.1594/PANGAEA.858207&filterParameterValue=1,TARA_N000002291	https://ws.pangaea.de/dds-fdp/rest/panquery?datasetDOI=doi.pangaea.de/10.1594/PANGAEA.842197&filterParameterValue=1,TARA_N000002291
TARA_N000002303	TARA_128	SEQ-(500mL-or-15min)_N180-2000	TARA_128_DCM_180-2000	Trades Biome	[NPO] North Pacific Ocean	[PEOD] Pacific Equatorial Divergence Province (MRGID:21489)	[DCM] deep chlorophyll maximum layer (ENVO:01000326)	2011-09-05T02:29	0,0348	-153,7857	39,22	2011-09-05	16:14	26,08	35,13	177,24	4,23	0,44	0,55	446,41	430,88	5,26	4	0,12	https://ws.pangaea.de/dds-fdp/rest/panquery?datasetDOI=doi.pangaea.de/10.1594/PANGAEA.853810&filterParameterValue=1,TARA_N000002303	https://ws.pangaea.de/dds-fdp/rest/panquery?datasetDOI=doi.pangaea.de/10.1594/PANGAEA.858201&filterParameterValue=1,TARA_N000002303	https://ws.pangaea.de/dds-fdp/rest/panquery?datasetDOI=doi.pangaea.de/10.1594/PANGAEA.858207&filterParameterValue=1,TARA_N000002303	https://ws.pangaea.de/dds-fdp/rest/panquery?datasetDOI=doi.pangaea.de/10.1594/PANGAEA.842197&filterParameterValue=1,TARA_N000002303
TARA_N000002299	TARA_128	SEQ-(500mL-or-15min)_N20-180	TARA_128_DCM_20-180	Trades Biome	[NPO] North Pacific Ocean	[PEOD] Pacific Equatorial Divergence Province (MRGID:21489)	[DCM] deep chlorophyll maximum layer (ENVO:01000326)	2011-09-05T03:00	0,0396	-153,8066	39,22	2011-09-05	16:45	26,08	35,13	177,24	4,23	0,44	0,55	446,41	430,88	5,26	4	0,12	https://ws.pangaea.de/dds-fdp/rest/panquery?datasetDOI=doi.pangaea.de/10.1594/PANGAEA.853810&filterParameterValue=1,TARA_N000002299	https://ws.pangaea.de/dds-fdp/rest/panquery?datasetDOI=doi.pangaea.de/10.1594/PANGAEA.858201&filterParameterValue=1,TARA_N000002299	https://ws.pangaea.de/dds-fdp/rest/panquery?datasetDOI=doi.pangaea.de/10.1594/PANGAEA.858207&filterParameterValue=1,TARA_N000002299	https://ws.pangaea.de/dds-fdp/rest/panquery?datasetDOI=doi.pangaea.de/10.1594/PANGAEA.842197&filterParameterValue=1,TARA_N000002299
TARA_N000002295	TARA_128	SEQ-(500mL-or-15min)_N5-20	TARA_128_DCM_5-20	Trades Biome	[NPO] North Pacific Ocean	[PEOD] Pacific Equatorial Divergence Province (MRGID:21489)	[DCM] deep chlorophyll maximum layer (ENVO:01000326)	2011-09-05T17:07	1	-153,6387	39,22	2011-09-06	06:53	26,08	35,13	177,24	4,23	0,44	0,55	446,41	430,88	5,26	4	0,12	https://ws.pangaea.de/dds-fdp/rest/panquery?datasetDOI=doi.pangaea.de/10.1594/PANGAEA.853810&filterParameterValue=1,TARA_N000002295	https://ws.pangaea.de/dds-fdp/rest/panquery?datasetDOI=doi.pangaea.de/10.1594/PANGAEA.858201&filterParameterValue=1,TARA_N000002295	https://ws.pangaea.de/dds-fdp/rest/panquery?datasetDOI=doi.pangaea.de/10.1594/PANGAEA.858207&filterParameterValue=1,TARA_N000002295	https://ws.pangaea.de/dds-fdp/rest/panquery?datasetDOI=doi.pangaea.de/10.1594/PANGAEA.842197&filterParameterValue=1,TARA_N000002295
TARA_N000002285	TARA_128	SEQ-(100L-or-15min)_W>0.8	TARA_128_SRF_0.8-2000	Trades Biome	[NPO] North Pacific Ocean	[PEOD] Pacific Equatorial Divergence Province (MRGID:21489)	[SRF] surface water layer (ENVO:00010504)	2011-09-04T18:00	0,0003	-153,6759	6,01	2011-09-05	07:46	26,21	35,12	180,49	4,31	0,16	0,54	446,41	430,88	5,08	4	0,26	https://ws.pangaea.de/dds-fdp/rest/panquery?datasetDOI=doi.pangaea.de/10.1594/PANGAEA.853810&filterParameterValue=1,TARA_N000002285	https://ws.pangaea.de/dds-fdp/rest/panquery?datasetDOI=doi.pangaea.de/10.1594/PANGAEA.858201&filterParameterValue=1,TARA_N000002285	https://ws.pangaea.de/dds-fdp/rest/panquery?datasetDOI=doi.pangaea.de/10.1594/PANGAEA.858207&filterParameterValue=1,TARA_N000002285	https://ws.pangaea.de/dds-fdp/rest/panquery?datasetDOI=doi.pangaea.de/10.1594/PANGAEA.842197&filterParameterValue=1,TARA_N000002285
TARA_N000002289	TARA_128	SEQ-(100L-or-15min)_W0.8-5	TARA_128_SRF_0.8-5	Trades Biome	[NPO] North Pacific Ocean	[PEOD] Pacific Equatorial Divergence Province (MRGID:21489)	[SRF] surface water layer (ENVO:00010504)	2011-09-04T18:00	0,0003	-153,6759	6,01	2011-09-05	07:46	26,21	35,12	180,49	4,31	0,16	0,54	446,41	430,88	5,08	4	0,26	https://ws.pangaea.de/dds-fdp/rest/panquery?datasetDOI=doi.pangaea.de/10.1594/PANGAEA.853810&filterParameterValue=1,TARA_N000002289	https://ws.pangaea.de/dds-fdp/rest/panquery?datasetDOI=doi.pangaea.de/10.1594/PANGAEA.858201&filterParameterValue=1,TARA_N000002289	https://ws.pangaea.de/dds-fdp/rest/panquery?datasetDOI=doi.pangaea.de/10.1594/PANGAEA.858207&filterParameterValue=1,TARA_N000002289	https://ws.pangaea.de/dds-fdp/rest/panquery?datasetDOI=doi.pangaea.de/10.1594/PANGAEA.842197&filterParameterValue=1,TARA_N000002289
TARA_N000002301	TARA_128	SEQ-(500mL-or-15min)_N180-2000	TARA_128_SRF_180-2000	Trades Biome	[NPO] North Pacific Ocean	[PEOD] Pacific Equatorial Divergence Province (MRGID:21489)	[SRF] surface water layer (ENVO:00010504)	2011-09-04T20:50	0,0193	-153,7487	6,01	2011-09-05	10:35	26,21	35,12	180,49	4,31	0,16	0,54	446,41	430,88	5,08	4	0,26	https://ws.pangaea.de/dds-fdp/rest/panquery?datasetDOI=doi.pangaea.de/10.1594/PANGAEA.853810&filterParameterValue=1,TARA_N000002301	https://ws.pangaea.de/dds-fdp/rest/panquery?datasetDOI=doi.pangaea.de/10.1594/PANGAEA.858201&filterParameterValue=1,TARA_N000002301	https://ws.pangaea.de/dds-fdp/rest/panquery?datasetDOI=doi.pangaea.de/10.1594/PANGAEA.858207&filterParameterValue=1,TARA_N000002301	https://ws.pangaea.de/dds-fdp/rest/panquery?datasetDOI=doi.pangaea.de/10.1594/PANGAEA.842197&filterParameterValue=1,TARA_N000002301
TARA_N000002297	TARA_128	SEQ-(500mL-or-15min)_N20-180	TARA_128_SRF_20-180	Trades Biome	[NPO] North Pacific Ocean	[PEOD] Pacific Equatorial Divergence Province (MRGID:21489)	[SRF] surface water layer (ENVO:00010504)	2011-09-05T00:07	8	-153,7022	6,01	2011-09-05	13:53	26,21	35,12	180,49	4,31	0,16	0,54	446,41	430,88	5,08	4	0,26	https://ws.pangaea.de/dds-fdp/rest/panquery?datasetDOI=doi.pangaea.de/10.1594/PANGAEA.853810&filterParameterValue=1,TARA_N000002297	https://ws.pangaea.de/dds-fdp/rest/panquery?datasetDOI=doi.pangaea.de/10.1594/PANGAEA.858201&filterParameterValue=1,TARA_N000002297	https://ws.pangaea.de/dds-fdp/rest/panquery?datasetDOI=doi.pangaea.de/10.1594/PANGAEA.858207&filterParameterValue=1,TARA_N000002297	https://ws.pangaea.de/dds-fdp/rest/panquery?datasetDOI=doi.pangaea.de/10.1594/PANGAEA.842197&filterParameterValue=1,TARA_N000002297
TARA_N000002293	TARA_128	SEQ-(500mL-or-15min)_N5-20	TARA_128_SRF_5-20	Trades Biome	[NPO] North Pacific Ocean	[PEOD] Pacific Equatorial Divergence Province (MRGID:21489)	[SRF] surface water layer (ENVO:00010504)	2011-09-05T16:38	0,0078	-153,6265	6,01	2011-09-06	06:24	26,21	35,12	180,49	4,31	0,16	0,54	446,41	430,88	5,08	4	0,26	https://ws.pangaea.de/dds-fdp/rest/panquery?datasetDOI=doi.pangaea.de/10.1594/PANGAEA.853810&filterParameterValue=1,TARA_N000002293	https://ws.pangaea.de/dds-fdp/rest/panquery?datasetDOI=doi.pangaea.de/10.1594/PANGAEA.858201&filterParameterValue=1,TARA_N000002293	https://ws.pangaea.de/dds-fdp/rest/panquery?datasetDOI=doi.pangaea.de/10.1594/PANGAEA.858207&filterParameterValue=1,TARA_N000002293	https://ws.pangaea.de/dds-fdp/rest/panquery?datasetDOI=doi.pangaea.de/10.1594/PANGAEA.842197&filterParameterValue=1,TARA_N000002293
TARA_N000002350	TARA_131	SEQ-(100L-or-15min)_W>0.8	TARA_131_DCM_0.8-2000	Trades Biome	[NPO] North Pacific Ocean	[NPTG] North Pacific Tropical Gyre Province (MRGID:21487)	[DCM] deep chlorophyll maximum layer (ENVO:01000326)	2011-09-30T17:37:06	22,7901	-157,9439	115,29	2011-10-01	07:15	21,71	35,25	207,95	-0,35	0,15	0,02	115,98	NA	0,02	382	0,01	https://ws.pangaea.de/dds-fdp/rest/panquery?datasetDOI=doi.pangaea.de/10.1594/PANGAEA.853810&filterParameterValue=1,TARA_N000002350	https://ws.pangaea.de/dds-fdp/rest/panquery?datasetDOI=doi.pangaea.de/10.1594/PANGAEA.858201&filterParameterValue=1,TARA_N000002350	https://ws.pangaea.de/dds-fdp/rest/panquery?datasetDOI=doi.pangaea.de/10.1594/PANGAEA.858207&filterParameterValue=1,TARA_N000002350	https://ws.pangaea.de/dds-fdp/rest/panquery?datasetDOI=doi.pangaea.de/10.1594/PANGAEA.842197&filterParameterValue=1,TARA_N000002350
TARA_N000002354	TARA_131	SEQ-(100L-or-15min)_W0.8-5	TARA_131_DCM_0.8-5	Trades Biome	[NPO] North Pacific Ocean	[NPTG] North Pacific Tropical Gyre Province (MRGID:21487)	[DCM] deep chlorophyll maximum layer (ENVO:01000326)	2011-09-30T17:37:06	22,7901	-157,9439	115,29	2011-10-01	07:15	21,71	35,25	207,95	-0,35	0,15	0,02	115,98	NA	0,02	382	0,01	https://ws.pangaea.de/dds-fdp/rest/panquery?datasetDOI=doi.pangaea.de/10.1594/PANGAEA.853810&filterParameterValue=1,TARA_N000002354	https://ws.pangaea.de/dds-fdp/rest/panquery?datasetDOI=doi.pangaea.de/10.1594/PANGAEA.858201&filterParameterValue=1,TARA_N000002354	https://ws.pangaea.de/dds-fdp/rest/panquery?datasetDOI=doi.pangaea.de/10.1594/PANGAEA.858207&filterParameterValue=1,TARA_N000002354	https://ws.pangaea.de/dds-fdp/rest/panquery?datasetDOI=doi.pangaea.de/10.1594/PANGAEA.842197&filterParameterValue=1,TARA_N000002354
TARA_N000002366	TARA_131	SEQ-(500mL-or-15min)_N180-2000	TARA_131_DCM_180-2000	Trades Biome	[NPO] North Pacific Ocean	[NPTG] North Pacific Tropical Gyre Province (MRGID:21487)	[DCM] deep chlorophyll maximum layer (ENVO:01000326)	2011-09-30T20:58	22,7478	-158,0513	115,29	2011-10-01	10:35	21,71	35,25	207,95	-0,35	0,15	0,02	115,98	NA	0,02	382	0,01	https://ws.pangaea.de/dds-fdp/rest/panquery?datasetDOI=doi.pangaea.de/10.1594/PANGAEA.853810&filterParameterValue=1,TARA_N000002366	https://ws.pangaea.de/dds-fdp/rest/panquery?datasetDOI=doi.pangaea.de/10.1594/PANGAEA.858201&filterParameterValue=1,TARA_N000002366	https://ws.pangaea.de/dds-fdp/rest/panquery?datasetDOI=doi.pangaea.de/10.1594/PANGAEA.858207&filterParameterValue=1,TARA_N000002366	https://ws.pangaea.de/dds-fdp/rest/panquery?datasetDOI=doi.pangaea.de/10.1594/PANGAEA.842197&filterParameterValue=1,TARA_N000002366
TARA_N000002362	TARA_131	SEQ-(500mL-or-15min)_N20-180	TARA_131_DCM_20-180	Trades Biome	[NPO] North Pacific Ocean	[NPTG] North Pacific Tropical Gyre Province (MRGID:21487)	[DCM] deep chlorophyll maximum layer (ENVO:01000326)	2011-09-30T21:37	22,7384	-158,0715	115,29	2011-10-01	11:14	21,71	35,25	207,95	-0,35	0,15	0,02	115,98	NA	0,02	382	0,01	https://ws.pangaea.de/dds-fdp/rest/panquery?datasetDOI=doi.pangaea.de/10.1594/PANGAEA.853810&filterParameterValue=1,TARA_N000002362	https://ws.pangaea.de/dds-fdp/rest/panquery?datasetDOI=doi.pangaea.de/10.1594/PANGAEA.858201&filterParameterValue=1,TARA_N000002362	https://ws.pangaea.de/dds-fdp/rest/panquery?datasetDOI=doi.pangaea.de/10.1594/PANGAEA.858207&filterParameterValue=1,TARA_N000002362	https://ws.pangaea.de/dds-fdp/rest/panquery?datasetDOI=doi.pangaea.de/10.1594/PANGAEA.842197&filterParameterValue=1,TARA_N000002362
TARA_N000002358	TARA_131	SEQ-(500mL-or-15min)_N5-20	TARA_131_DCM_5-20	Trades Biome	[NPO] North Pacific Ocean	[NPTG] North Pacific Tropical Gyre Province (MRGID:21487)	[DCM] deep chlorophyll maximum layer (ENVO:01000326)	2011-09-30T22:11	22,7281	-158,0907	115,29	2011-10-01	11:48	21,71	35,25	207,95	-0,35	0,15	0,02	115,98	NA	0,02	382	0,01	https://ws.pangaea.de/dds-fdp/rest/panquery?datasetDOI=doi.pangaea.de/10.1594/PANGAEA.853810&filterParameterValue=1,TARA_N000002358	https://ws.pangaea.de/dds-fdp/rest/panquery?datasetDOI=doi.pangaea.de/10.1594/PANGAEA.858201&filterParameterValue=1,TARA_N000002358	https://ws.pangaea.de/dds-fdp/rest/panquery?datasetDOI=doi.pangaea.de/10.1594/PANGAEA.858207&filterParameterValue=1,TARA_N000002358	https://ws.pangaea.de/dds-fdp/rest/panquery?datasetDOI=doi.pangaea.de/10.1594/PANGAEA.842197&filterParameterValue=1,TARA_N000002358
TARA_N000002348	TARA_131	SEQ-(100L-or-15min)_W>0.8	TARA_131_SRF_0.8-2000	Trades Biome	[NPO] North Pacific Ocean	[NPTG] North Pacific Tropical Gyre Province (MRGID:21487)	[SRF] surface water layer (ENVO:00010504)	2011-09-29T19:23	22,7598	-157,9568	5,88	2011-09-30	09:00	26,32	35,23	195,13	-1,01	0,03	0,05	115,98	NA	0,03	196	0,00	https://ws.pangaea.de/dds-fdp/rest/panquery?datasetDOI=doi.pangaea.de/10.1594/PANGAEA.853810&filterParameterValue=1,TARA_N000002348	https://ws.pangaea.de/dds-fdp/rest/panquery?datasetDOI=doi.pangaea.de/10.1594/PANGAEA.858201&filterParameterValue=1,TARA_N000002348	https://ws.pangaea.de/dds-fdp/rest/panquery?datasetDOI=doi.pangaea.de/10.1594/PANGAEA.858207&filterParameterValue=1,TARA_N000002348	https://ws.pangaea.de/dds-fdp/rest/panquery?datasetDOI=doi.pangaea.de/10.1594/PANGAEA.842197&filterParameterValue=1,TARA_N000002348
TARA_N000002352	TARA_131	SEQ-(100L-or-15min)_W0.8-5	TARA_131_SRF_0.8-5	Trades Biome	[NPO] North Pacific Ocean	[NPTG] North Pacific Tropical Gyre Province (MRGID:21487)	[SRF] surface water layer (ENVO:00010504)	2011-09-29T19:23	22,7598	-157,9568	5,88	2011-09-30	09:00	26,32	35,23	195,13	-1,01	0,03	0,05	115,98	NA	0,03	196	0,00	https://ws.pangaea.de/dds-fdp/rest/panquery?datasetDOI=doi.pangaea.de/10.1594/PANGAEA.853810&filterParameterValue=1,TARA_N000002352	https://ws.pangaea.de/dds-fdp/rest/panquery?datasetDOI=doi.pangaea.de/10.1594/PANGAEA.858201&filterParameterValue=1,TARA_N000002352	https://ws.pangaea.de/dds-fdp/rest/panquery?datasetDOI=doi.pangaea.de/10.1594/PANGAEA.858207&filterParameterValue=1,TARA_N000002352	https://ws.pangaea.de/dds-fdp/rest/panquery?datasetDOI=doi.pangaea.de/10.1594/PANGAEA.842197&filterParameterValue=1,TARA_N000002352
TARA_N000002364	TARA_131	SEQ-(500mL-or-15min)_N180-2000	TARA_131_SRF_180-2000	Trades Biome	[NPO] North Pacific Ocean	[NPTG] North Pacific Tropical Gyre Province (MRGID:21487)	[SRF] surface water layer (ENVO:00010504)	2011-09-30T00:56	22,7511	-157,9632	5,88	2011-09-30	14:33	26,32	35,23	195,13	-1,01	0,03	0,05	115,98	NA	0,03	196	0,00	https://ws.pangaea.de/dds-fdp/rest/panquery?datasetDOI=doi.pangaea.de/10.1594/PANGAEA.853810&filterParameterValue=1,TARA_N000002364	https://ws.pangaea.de/dds-fdp/rest/panquery?datasetDOI=doi.pangaea.de/10.1594/PANGAEA.858201&filterParameterValue=1,TARA_N000002364	https://ws.pangaea.de/dds-fdp/rest/panquery?datasetDOI=doi.pangaea.de/10.1594/PANGAEA.858207&filterParameterValue=1,TARA_N000002364	https://ws.pangaea.de/dds-fdp/rest/panquery?datasetDOI=doi.pangaea.de/10.1594/PANGAEA.842197&filterParameterValue=1,TARA_N000002364
TARA_N000002360	TARA_131	SEQ-(500mL-or-15min)_N20-180	TARA_131_SRF_20-180	Trades Biome	[NPO] North Pacific Ocean	[NPTG] North Pacific Tropical Gyre Province (MRGID:21487)	[SRF] surface water layer (ENVO:00010504)	2011-09-30T02:25	22,7267	-157,9955	5,88	2011-09-30	16:02	26,32	35,23	195,13	-1,01	0,03	0,05	115,98	NA	0,03	196	0,00	https://ws.pangaea.de/dds-fdp/rest/panquery?datasetDOI=doi.pangaea.de/10.1594/PANGAEA.853810&filterParameterValue=1,TARA_N000002360	https://ws.pangaea.de/dds-fdp/rest/panquery?datasetDOI=doi.pangaea.de/10.1594/PANGAEA.858201&filterParameterValue=1,TARA_N000002360	https://ws.pangaea.de/dds-fdp/rest/panquery?datasetDOI=doi.pangaea.de/10.1594/PANGAEA.858207&filterParameterValue=1,TARA_N000002360	https://ws.pangaea.de/dds-fdp/rest/panquery?datasetDOI=doi.pangaea.de/10.1594/PANGAEA.842197&filterParameterValue=1,TARA_N000002360
TARA_N000002356	TARA_131	SEQ-(500mL-or-15min)_N5-20	TARA_131_SRF_5-20	Trades Biome	[NPO] North Pacific Ocean	[NPTG] North Pacific Tropical Gyre Province (MRGID:21487)	[SRF] surface water layer (ENVO:00010504)	2011-09-30T03:33	22,7091	-158,0247	5,88	2011-09-30	17:10	26,32	35,23	195,13	-1,01	0,03	0,05	115,98	NA	0,03	196	0,00	https://ws.pangaea.de/dds-fdp/rest/panquery?datasetDOI=doi.pangaea.de/10.1594/PANGAEA.853810&filterParameterValue=1,TARA_N000002356	https://ws.pangaea.de/dds-fdp/rest/panquery?datasetDOI=doi.pangaea.de/10.1594/PANGAEA.858201&filterParameterValue=1,TARA_N000002356	https://ws.pangaea.de/dds-fdp/rest/panquery?datasetDOI=doi.pangaea.de/10.1594/PANGAEA.858207&filterParameterValue=1,TARA_N000002356	https://ws.pangaea.de/dds-fdp/rest/panquery?datasetDOI=doi.pangaea.de/10.1594/PANGAEA.842197&filterParameterValue=1,TARA_N000002356
TARA_N000002422	TARA_132	SEQ-(100L-or-15min)_W>0.8	TARA_132_DCM_0.8-2000	Westerlies Biome	[NPO] North Pacific Ocean	[NPST] North Pacific Subtropical and Polar Front Provinces (MRGID:21484)	[DCM] deep chlorophyll maximum layer (ENVO:01000326)	2011-10-05T00:59:03	31,5168	-159046	121,74	2011-10-05	14:34	14,73	34,36	215,27	0,00	0,23	0,25	974,54	241,49	0,05	633	0,21	https://ws.pangaea.de/dds-fdp/rest/panquery?datasetDOI=doi.pangaea.de/10.1594/PANGAEA.853810&filterParameterValue=1,TARA_N000002422	https://ws.pangaea.de/dds-fdp/rest/panquery?datasetDOI=doi.pangaea.de/10.1594/PANGAEA.858201&filterParameterValue=1,TARA_N000002422	https://ws.pangaea.de/dds-fdp/rest/panquery?datasetDOI=doi.pangaea.de/10.1594/PANGAEA.858207&filterParameterValue=1,TARA_N000002422	https://ws.pangaea.de/dds-fdp/rest/panquery?datasetDOI=doi.pangaea.de/10.1594/PANGAEA.842197&filterParameterValue=1,TARA_N000002422
TARA_N000002418	TARA_132	SEQ-(100L-or-15min)_W0.8-5	TARA_132_DCM_0.8-5	Westerlies Biome	[NPO] North Pacific Ocean	[NPST] North Pacific Subtropical and Polar Front Provinces (MRGID:21484)	[DCM] deep chlorophyll maximum layer (ENVO:01000326)	2011-10-05T00:59:03	31,5168	-159046	121,74	2011-10-05	14:34	14,73	34,36	215,27	0,00	0,23	0,25	974,54	241,49	0,05	633	0,21	https://ws.pangaea.de/dds-fdp/rest/panquery?datasetDOI=doi.pangaea.de/10.1594/PANGAEA.853810&filterParameterValue=1,TARA_N000002418	https://ws.pangaea.de/dds-fdp/rest/panquery?datasetDOI=doi.pangaea.de/10.1594/PANGAEA.858201&filterParameterValue=1,TARA_N000002418	https://ws.pangaea.de/dds-fdp/rest/panquery?datasetDOI=doi.pangaea.de/10.1594/PANGAEA.858207&filterParameterValue=1,TARA_N000002418	https://ws.pangaea.de/dds-fdp/rest/panquery?datasetDOI=doi.pangaea.de/10.1594/PANGAEA.842197&filterParameterValue=1,TARA_N000002418
TARA_N000002402	TARA_132	SEQ-(500mL-or-15min)_N180-2000	TARA_132_DCM_180-2000	Westerlies Biome	[NPO] North Pacific Ocean	[NPST] North Pacific Subtropical and Polar Front Provinces (MRGID:21484)	[DCM] deep chlorophyll maximum layer (ENVO:01000326)	2011-10-05T00:27	31,5237	-159,0351	121,74	2011-10-05	14:02	14,73	34,36	215,27	0,00	0,23	0,25	974,54	241,49	0,05	633	0,21	https://ws.pangaea.de/dds-fdp/rest/panquery?datasetDOI=doi.pangaea.de/10.1594/PANGAEA.853810&filterParameterValue=1,TARA_N000002402	https://ws.pangaea.de/dds-fdp/rest/panquery?datasetDOI=doi.pangaea.de/10.1594/PANGAEA.858201&filterParameterValue=1,TARA_N000002402	https://ws.pangaea.de/dds-fdp/rest/panquery?datasetDOI=doi.pangaea.de/10.1594/PANGAEA.858207&filterParameterValue=1,TARA_N000002402	https://ws.pangaea.de/dds-fdp/rest/panquery?datasetDOI=doi.pangaea.de/10.1594/PANGAEA.842197&filterParameterValue=1,TARA_N000002402
TARA_N000002414	TARA_132	SEQ-(500mL-or-15min)_N5-20	TARA_132_DCM_5-20	Westerlies Biome	[NPO] North Pacific Ocean	[NPST] North Pacific Subtropical and Polar Front Provinces (MRGID:21484)	[DCM] deep chlorophyll maximum layer (ENVO:01000326)	2011-10-05T04:12	31471	-159101	121,74	2011-10-05	17:46	14,73	34,36	215,27	0,00	0,23	0,25	974,54	241,49	0,05	633	0,21	https://ws.pangaea.de/dds-fdp/rest/panquery?datasetDOI=doi.pangaea.de/10.1594/PANGAEA.853810&filterParameterValue=1,TARA_N000002414	https://ws.pangaea.de/dds-fdp/rest/panquery?datasetDOI=doi.pangaea.de/10.1594/PANGAEA.858201&filterParameterValue=1,TARA_N000002414	https://ws.pangaea.de/dds-fdp/rest/panquery?datasetDOI=doi.pangaea.de/10.1594/PANGAEA.858207&filterParameterValue=1,TARA_N000002414	https://ws.pangaea.de/dds-fdp/rest/panquery?datasetDOI=doi.pangaea.de/10.1594/PANGAEA.842197&filterParameterValue=1,TARA_N000002414
TARA_N000002420	TARA_132	SEQ-(100L-or-15min)_W>0.8	TARA_132_SRF_0.8-2000	Westerlies Biome	[NPO] North Pacific Ocean	[NPST] North Pacific Subtropical and Polar Front Provinces (MRGID:21484)	[SRF] surface water layer (ENVO:00010504)	2011-10-04T17:46	31,5213	-158,9958	5,47	2011-10-05	07:21	25,11	35,19	197,85	0,02	0,03	0,01	974,54	252,21	0,01	815	0,04	https://ws.pangaea.de/dds-fdp/rest/panquery?datasetDOI=doi.pangaea.de/10.1594/PANGAEA.853810&filterParameterValue=1,TARA_N000002420	https://ws.pangaea.de/dds-fdp/rest/panquery?datasetDOI=doi.pangaea.de/10.1594/PANGAEA.858201&filterParameterValue=1,TARA_N000002420	https://ws.pangaea.de/dds-fdp/rest/panquery?datasetDOI=doi.pangaea.de/10.1594/PANGAEA.858207&filterParameterValue=1,TARA_N000002420	https://ws.pangaea.de/dds-fdp/rest/panquery?datasetDOI=doi.pangaea.de/10.1594/PANGAEA.842197&filterParameterValue=1,TARA_N000002420
TARA_N000002416	TARA_132	SEQ-(100L-or-15min)_W0.8-5	TARA_132_SRF_0.8-5	Westerlies Biome	[NPO] North Pacific Ocean	[NPST] North Pacific Subtropical and Polar Front Provinces (MRGID:21484)	[SRF] surface water layer (ENVO:00010504)	2011-10-04T17:46	31,5213	-158,9958	5,47	2011-10-05	07:21	25,11	35,19	197,85	0,02	0,03	0,01	974,54	252,21	0,01	815	0,04	https://ws.pangaea.de/dds-fdp/rest/panquery?datasetDOI=doi.pangaea.de/10.1594/PANGAEA.853810&filterParameterValue=1,TARA_N000002416	https://ws.pangaea.de/dds-fdp/rest/panquery?datasetDOI=doi.pangaea.de/10.1594/PANGAEA.858201&filterParameterValue=1,TARA_N000002416	https://ws.pangaea.de/dds-fdp/rest/panquery?datasetDOI=doi.pangaea.de/10.1594/PANGAEA.858207&filterParameterValue=1,TARA_N000002416	https://ws.pangaea.de/dds-fdp/rest/panquery?datasetDOI=doi.pangaea.de/10.1594/PANGAEA.842197&filterParameterValue=1,TARA_N000002416
TARA_N000002400	TARA_132	SEQ-(500mL-or-15min)_N180-2000	TARA_132_SRF_180-2000	Westerlies Biome	[NPO] North Pacific Ocean	[NPST] North Pacific Subtropical and Polar Front Provinces (MRGID:21484)	[SRF] surface water layer (ENVO:00010504)	2011-10-04T20:12	31,5024	-159,0393	5,47	2011-10-05	09:47	25,11	35,19	197,85	0,02	0,03	0,01	974,54	252,21	0,01	815	0,04	https://ws.pangaea.de/dds-fdp/rest/panquery?datasetDOI=doi.pangaea.de/10.1594/PANGAEA.853810&filterParameterValue=1,TARA_N000002400	https://ws.pangaea.de/dds-fdp/rest/panquery?datasetDOI=doi.pangaea.de/10.1594/PANGAEA.858201&filterParameterValue=1,TARA_N000002400	https://ws.pangaea.de/dds-fdp/rest/panquery?datasetDOI=doi.pangaea.de/10.1594/PANGAEA.858207&filterParameterValue=1,TARA_N000002400	https://ws.pangaea.de/dds-fdp/rest/panquery?datasetDOI=doi.pangaea.de/10.1594/PANGAEA.842197&filterParameterValue=1,TARA_N000002400
TARA_N000002404	TARA_132	SEQ-(500mL-or-15min)_N20-180	TARA_132_SRF_20-180	Westerlies Biome	[NPO] North Pacific Ocean	[NPST] North Pacific Subtropical and Polar Front Provinces (MRGID:21484)	[SRF] surface water layer (ENVO:00010504)	2011-10-04T21:28	31,4901	-159,0669	5,47	2011-10-05	11:03	25,11	35,19	197,85	0,02	0,03	0,01	974,54	252,21	0,01	815	0,04	https://ws.pangaea.de/dds-fdp/rest/panquery?datasetDOI=doi.pangaea.de/10.1594/PANGAEA.853810&filterParameterValue=1,TARA_N000002404	https://ws.pangaea.de/dds-fdp/rest/panquery?datasetDOI=doi.pangaea.de/10.1594/PANGAEA.858201&filterParameterValue=1,TARA_N000002404	https://ws.pangaea.de/dds-fdp/rest/panquery?datasetDOI=doi.pangaea.de/10.1594/PANGAEA.858207&filterParameterValue=1,TARA_N000002404	https://ws.pangaea.de/dds-fdp/rest/panquery?datasetDOI=doi.pangaea.de/10.1594/PANGAEA.842197&filterParameterValue=1,TARA_N000002404
TARA_N000002412	TARA_132	SEQ-(500mL-or-15min)_N5-20	TARA_132_SRF_5-20	Westerlies Biome	[NPO] North Pacific Ocean	[NPST] North Pacific Subtropical and Polar Front Provinces (MRGID:21484)	[SRF] surface water layer (ENVO:00010504)	2011-10-04T21:49	31,4868	-159,0749	5,47	2011-10-05	11:23	25,11	35,19	197,85	0,02	0,03	0,01	974,54	252,21	0,01	815	0,04	https://ws.pangaea.de/dds-fdp/rest/panquery?datasetDOI=doi.pangaea.de/10.1594/PANGAEA.853810&filterParameterValue=1,TARA_N000002412	https://ws.pangaea.de/dds-fdp/rest/panquery?datasetDOI=doi.pangaea.de/10.1594/PANGAEA.858201&filterParameterValue=1,TARA_N000002412	https://ws.pangaea.de/dds-fdp/rest/panquery?datasetDOI=doi.pangaea.de/10.1594/PANGAEA.858207&filterParameterValue=1,TARA_N000002412	https://ws.pangaea.de/dds-fdp/rest/panquery?datasetDOI=doi.pangaea.de/10.1594/PANGAEA.842197&filterParameterValue=1,TARA_N000002412
TARA_N000002183	TARA_135	SEQ-(100L-or-15min)_W>0.8	TARA_135_DCM_0.8-2000	Coastal Biome	[NPO] North Pacific Ocean	[OCAL] Offshore California Current (MRGID:21493)	[DCM] deep chlorophyll maximum layer (ENVO:01000326)	2011-10-23T21:22	32931	-121,8645	36,21	2011-10-23	13:30	15,59	33,48	210,07	0,34	0,56	0,48	152,36	NA	1,30	28	0,11	https://ws.pangaea.de/dds-fdp/rest/panquery?datasetDOI=doi.pangaea.de/10.1594/PANGAEA.853810&filterParameterValue=1,TARA_N000002183	https://ws.pangaea.de/dds-fdp/rest/panquery?datasetDOI=doi.pangaea.de/10.1594/PANGAEA.858201&filterParameterValue=1,TARA_N000002183	https://ws.pangaea.de/dds-fdp/rest/panquery?datasetDOI=doi.pangaea.de/10.1594/PANGAEA.858207&filterParameterValue=1,TARA_N000002183	https://ws.pangaea.de/dds-fdp/rest/panquery?datasetDOI=doi.pangaea.de/10.1594/PANGAEA.842197&filterParameterValue=1,TARA_N000002183
TARA_N000002191	TARA_135	SEQ-(100L-or-15min)_W0.8-5	TARA_135_DCM_0.8-5	Coastal Biome	[NPO] North Pacific Ocean	[OCAL] Offshore California Current (MRGID:21493)	[DCM] deep chlorophyll maximum layer (ENVO:01000326)	2011-10-23T21:22	32931	-121,8645	36,21	2011-10-23	13:30	15,59	33,48	210,07	0,34	0,56	0,48	152,36	NA	1,30	28	0,11	https://ws.pangaea.de/dds-fdp/rest/panquery?datasetDOI=doi.pangaea.de/10.1594/PANGAEA.853810&filterParameterValue=1,TARA_N000002191	https://ws.pangaea.de/dds-fdp/rest/panquery?datasetDOI=doi.pangaea.de/10.1594/PANGAEA.858201&filterParameterValue=1,TARA_N000002191	https://ws.pangaea.de/dds-fdp/rest/panquery?datasetDOI=doi.pangaea.de/10.1594/PANGAEA.858207&filterParameterValue=1,TARA_N000002191	https://ws.pangaea.de/dds-fdp/rest/panquery?datasetDOI=doi.pangaea.de/10.1594/PANGAEA.842197&filterParameterValue=1,TARA_N000002191
TARA_N000002199	TARA_135	SEQ-(500mL-or-15min)_N180-2000	TARA_135_DCM_180-2000	Coastal Biome	[NPO] North Pacific Ocean	[OCAL] Offshore California Current (MRGID:21493)	[DCM] deep chlorophyll maximum layer (ENVO:01000326)	2011-10-24T00:15	32,9916	-121,8536	36,21	2011-10-24	16:23	15,59	33,48	210,07	0,34	0,56	0,48	152,36	NA	1,30	28	0,11	https://ws.pangaea.de/dds-fdp/rest/panquery?datasetDOI=doi.pangaea.de/10.1594/PANGAEA.853810&filterParameterValue=1,TARA_N000002199	https://ws.pangaea.de/dds-fdp/rest/panquery?datasetDOI=doi.pangaea.de/10.1594/PANGAEA.858201&filterParameterValue=1,TARA_N000002199	https://ws.pangaea.de/dds-fdp/rest/panquery?datasetDOI=doi.pangaea.de/10.1594/PANGAEA.858207&filterParameterValue=1,TARA_N000002199	https://ws.pangaea.de/dds-fdp/rest/panquery?datasetDOI=doi.pangaea.de/10.1594/PANGAEA.842197&filterParameterValue=1,TARA_N000002199
TARA_N000002195	TARA_135	SEQ-(500mL-or-15min)_N20-180	TARA_135_DCM_20-180	Coastal Biome	[NPO] North Pacific Ocean	[OCAL] Offshore California Current (MRGID:21493)	[DCM] deep chlorophyll maximum layer (ENVO:01000326)	2011-10-24T00:34	32,9909	-121,8522	36,21	2011-10-24	16:42	15,59	33,48	210,07	0,34	0,56	0,48	152,36	NA	1,30	28	0,11	https://ws.pangaea.de/dds-fdp/rest/panquery?datasetDOI=doi.pangaea.de/10.1594/PANGAEA.853810&filterParameterValue=1,TARA_N000002195	https://ws.pangaea.de/dds-fdp/rest/panquery?datasetDOI=doi.pangaea.de/10.1594/PANGAEA.858201&filterParameterValue=1,TARA_N000002195	https://ws.pangaea.de/dds-fdp/rest/panquery?datasetDOI=doi.pangaea.de/10.1594/PANGAEA.858207&filterParameterValue=1,TARA_N000002195	https://ws.pangaea.de/dds-fdp/rest/panquery?datasetDOI=doi.pangaea.de/10.1594/PANGAEA.842197&filterParameterValue=1,TARA_N000002195
TARA_N000002187	TARA_135	SEQ-(500mL-or-15min)_N5-20	TARA_135_DCM_5-20	Coastal Biome	[NPO] North Pacific Ocean	[OCAL] Offshore California Current (MRGID:21493)	[DCM] deep chlorophyll maximum layer (ENVO:01000326)	2011-10-24T01:37	32,9903	-121,8463	36,21	2011-10-24	17:45	15,59	33,48	210,07	0,34	0,56	0,48	152,36	NA	1,30	28	0,11	https://ws.pangaea.de/dds-fdp/rest/panquery?datasetDOI=doi.pangaea.de/10.1594/PANGAEA.853810&filterParameterValue=1,TARA_N000002187	https://ws.pangaea.de/dds-fdp/rest/panquery?datasetDOI=doi.pangaea.de/10.1594/PANGAEA.858201&filterParameterValue=1,TARA_N000002187	https://ws.pangaea.de/dds-fdp/rest/panquery?datasetDOI=doi.pangaea.de/10.1594/PANGAEA.858207&filterParameterValue=1,TARA_N000002187	https://ws.pangaea.de/dds-fdp/rest/panquery?datasetDOI=doi.pangaea.de/10.1594/PANGAEA.842197&filterParameterValue=1,TARA_N000002187
TARA_N000002464	TARA_135	SEQ-(100L-or-15min)_W>0.8	TARA_135_SRF_0.8-2000	Coastal Biome	[NPO] North Pacific Ocean	[OCAL] Offshore California Current (MRGID:21493)	[SRF] surface water layer (ENVO:00010504)	2011-10-23T14:24	32,9986	-121,7698	5,43	2011-10-24	06:32	17,59	33,48	226,11	0,13	0,31	0,28	152,36	NA	0,01	34	0,05	https://ws.pangaea.de/dds-fdp/rest/panquery?datasetDOI=doi.pangaea.de/10.1594/PANGAEA.853810&filterParameterValue=1,TARA_N000002464	https://ws.pangaea.de/dds-fdp/rest/panquery?datasetDOI=doi.pangaea.de/10.1594/PANGAEA.858201&filterParameterValue=1,TARA_N000002464	https://ws.pangaea.de/dds-fdp/rest/panquery?datasetDOI=doi.pangaea.de/10.1594/PANGAEA.858207&filterParameterValue=1,TARA_N000002464	https://ws.pangaea.de/dds-fdp/rest/panquery?datasetDOI=doi.pangaea.de/10.1594/PANGAEA.842197&filterParameterValue=1,TARA_N000002464
TARA_N000002179	TARA_135	SEQ-(100L-or-15min)_W0.8-5	TARA_135_SRF_0.8-5	Coastal Biome	[NPO] North Pacific Ocean	[OCAL] Offshore California Current (MRGID:21493)	[SRF] surface water layer (ENVO:00010504)	2011-10-23T14:24	32,9986	-121,7698	5,43	2011-10-24	06:32	17,59	33,48	226,11	0,13	0,31	0,28	152,36	NA	0,01	34	0,05	https://ws.pangaea.de/dds-fdp/rest/panquery?datasetDOI=doi.pangaea.de/10.1594/PANGAEA.853810&filterParameterValue=1,TARA_N000002179	https://ws.pangaea.de/dds-fdp/rest/panquery?datasetDOI=doi.pangaea.de/10.1594/PANGAEA.858201&filterParameterValue=1,TARA_N000002179	https://ws.pangaea.de/dds-fdp/rest/panquery?datasetDOI=doi.pangaea.de/10.1594/PANGAEA.858207&filterParameterValue=1,TARA_N000002179	https://ws.pangaea.de/dds-fdp/rest/panquery?datasetDOI=doi.pangaea.de/10.1594/PANGAEA.842197&filterParameterValue=1,TARA_N000002179
TARA_N000002175	TARA_135	SEQ-(500mL-or-15min)_N180-2000	TARA_135_SRF_180-2000	Coastal Biome	[NPO] North Pacific Ocean	[OCAL] Offshore California Current (MRGID:21493)	[SRF] surface water layer (ENVO:00010504)	2011-10-23T16:15	33008	-121,7579	5,43	2011-10-24	08:23	17,59	33,48	226,11	0,13	0,31	0,28	152,36	NA	0,01	34	0,05	https://ws.pangaea.de/dds-fdp/rest/panquery?datasetDOI=doi.pangaea.de/10.1594/PANGAEA.853810&filterParameterValue=1,TARA_N000002175	https://ws.pangaea.de/dds-fdp/rest/panquery?datasetDOI=doi.pangaea.de/10.1594/PANGAEA.858201&filterParameterValue=1,TARA_N000002175	https://ws.pangaea.de/dds-fdp/rest/panquery?datasetDOI=doi.pangaea.de/10.1594/PANGAEA.858207&filterParameterValue=1,TARA_N000002175	https://ws.pangaea.de/dds-fdp/rest/panquery?datasetDOI=doi.pangaea.de/10.1594/PANGAEA.842197&filterParameterValue=1,TARA_N000002175
TARA_N000002193	TARA_135	SEQ-(500mL-or-15min)_N20-180	TARA_135_SRF_20-180	Coastal Biome	[NPO] North Pacific Ocean	[OCAL] Offshore California Current (MRGID:21493)	[SRF] surface water layer (ENVO:00010504)	2011-10-23T18:03	33,02	-121,7406	5,43	2011-10-24	10:11	17,59	33,48	226,11	0,13	0,31	0,28	152,36	NA	0,01	34	0,05	https://ws.pangaea.de/dds-fdp/rest/panquery?datasetDOI=doi.pangaea.de/10.1594/PANGAEA.853810&filterParameterValue=1,TARA_N000002193	https://ws.pangaea.de/dds-fdp/rest/panquery?datasetDOI=doi.pangaea.de/10.1594/PANGAEA.858201&filterParameterValue=1,TARA_N000002193	https://ws.pangaea.de/dds-fdp/rest/panquery?datasetDOI=doi.pangaea.de/10.1594/PANGAEA.858207&filterParameterValue=1,TARA_N000002193	https://ws.pangaea.de/dds-fdp/rest/panquery?datasetDOI=doi.pangaea.de/10.1594/PANGAEA.842197&filterParameterValue=1,TARA_N000002193
TARA_N000002185	TARA_135	SEQ-(500mL-or-15min)_N5-20	TARA_135_SRF_5-20	Coastal Biome	[NPO] North Pacific Ocean	[OCAL] Offshore California Current (MRGID:21493)	[SRF] surface water layer (ENVO:00010504)	2011-10-23T20:41	33,0007	-121,8701	5,43	2011-10-23	12:49	17,59	33,48	226,11	0,13	0,31	0,28	152,36	NA	0,01	34	0,05	https://ws.pangaea.de/dds-fdp/rest/panquery?datasetDOI=doi.pangaea.de/10.1594/PANGAEA.853810&filterParameterValue=1,TARA_N000002185	https://ws.pangaea.de/dds-fdp/rest/panquery?datasetDOI=doi.pangaea.de/10.1594/PANGAEA.858201&filterParameterValue=1,TARA_N000002185	https://ws.pangaea.de/dds-fdp/rest/panquery?datasetDOI=doi.pangaea.de/10.1594/PANGAEA.858207&filterParameterValue=1,TARA_N000002185	https://ws.pangaea.de/dds-fdp/rest/panquery?datasetDOI=doi.pangaea.de/10.1594/PANGAEA.842197&filterParameterValue=1,TARA_N000002185
TARA_N000002959	TARA_136	SEQ-(100L-or-15min)_W>0.8	TARA_136_SRF_0.8-2000	Trades Biome	[NPO] North Pacific Ocean	[NPTG] North Pacific Tropical Gyre Province (MRGID:21487)	[SRF] surface water layer (ENVO:00010504)	2011-11-30T16:20	17,0854	-118,8913	5,50	2011-12-01	08:35	24,53	34,52	201,22	-1,15	0,25	0,31	464,17	NA	0,24	53	0,20	https://ws.pangaea.de/dds-fdp/rest/panquery?datasetDOI=doi.pangaea.de/10.1594/PANGAEA.853810&filterParameterValue=1,TARA_N000002959	https://ws.pangaea.de/dds-fdp/rest/panquery?datasetDOI=doi.pangaea.de/10.1594/PANGAEA.858201&filterParameterValue=1,TARA_N000002959	https://ws.pangaea.de/dds-fdp/rest/panquery?datasetDOI=doi.pangaea.de/10.1594/PANGAEA.858207&filterParameterValue=1,TARA_N000002959	https://ws.pangaea.de/dds-fdp/rest/panquery?datasetDOI=doi.pangaea.de/10.1594/PANGAEA.842197&filterParameterValue=1,TARA_N000002959
TARA_N000002961	TARA_136	SEQ-(100L-or-15min)_W0.8-5	TARA_136_SRF_0.8-5	Trades Biome	[NPO] North Pacific Ocean	[NPTG] North Pacific Tropical Gyre Province (MRGID:21487)	[SRF] surface water layer (ENVO:00010504)	2011-11-30T16:20	17,0854	-118,8913	5,50	2011-12-01	08:35	24,53	34,52	201,22	-1,15	0,25	0,31	464,17	NA	0,24	53	0,20	https://ws.pangaea.de/dds-fdp/rest/panquery?datasetDOI=doi.pangaea.de/10.1594/PANGAEA.853810&filterParameterValue=1,TARA_N000002961	https://ws.pangaea.de/dds-fdp/rest/panquery?datasetDOI=doi.pangaea.de/10.1594/PANGAEA.858201&filterParameterValue=1,TARA_N000002961	https://ws.pangaea.de/dds-fdp/rest/panquery?datasetDOI=doi.pangaea.de/10.1594/PANGAEA.858207&filterParameterValue=1,TARA_N000002961	https://ws.pangaea.de/dds-fdp/rest/panquery?datasetDOI=doi.pangaea.de/10.1594/PANGAEA.842197&filterParameterValue=1,TARA_N000002961
TARA_N000002967	TARA_136	SEQ-(500mL-or-15min)_N180-2000	TARA_136_SRF_180-2000	Trades Biome	[NPO] North Pacific Ocean	[NPTG] North Pacific Tropical Gyre Province (MRGID:21487)	[SRF] surface water layer (ENVO:00010504)	2011-11-30T17:16	17,0769	-118,8962	5,50	2011-12-01	09:31	24,53	34,52	201,22	-1,15	0,25	0,31	464,17	NA	0,24	53	0,20	https://ws.pangaea.de/dds-fdp/rest/panquery?datasetDOI=doi.pangaea.de/10.1594/PANGAEA.853810&filterParameterValue=1,TARA_N000002967	https://ws.pangaea.de/dds-fdp/rest/panquery?datasetDOI=doi.pangaea.de/10.1594/PANGAEA.858201&filterParameterValue=1,TARA_N000002967	https://ws.pangaea.de/dds-fdp/rest/panquery?datasetDOI=doi.pangaea.de/10.1594/PANGAEA.858207&filterParameterValue=1,TARA_N000002967	https://ws.pangaea.de/dds-fdp/rest/panquery?datasetDOI=doi.pangaea.de/10.1594/PANGAEA.842197&filterParameterValue=1,TARA_N000002967
TARA_N000002965	TARA_136	SEQ-(500mL-or-15min)_N20-180	TARA_136_SRF_20-180	Trades Biome	[NPO] North Pacific Ocean	[NPTG] North Pacific Tropical Gyre Province (MRGID:21487)	[SRF] surface water layer (ENVO:00010504)	2011-11-30T19:15	17,0552	-118,9008	5,50	2011-12-01	11:30	24,53	34,52	201,22	-1,15	0,25	0,31	464,17	NA	0,24	53	0,20	https://ws.pangaea.de/dds-fdp/rest/panquery?datasetDOI=doi.pangaea.de/10.1594/PANGAEA.853810&filterParameterValue=1,TARA_N000002965	https://ws.pangaea.de/dds-fdp/rest/panquery?datasetDOI=doi.pangaea.de/10.1594/PANGAEA.858201&filterParameterValue=1,TARA_N000002965	https://ws.pangaea.de/dds-fdp/rest/panquery?datasetDOI=doi.pangaea.de/10.1594/PANGAEA.858207&filterParameterValue=1,TARA_N000002965	https://ws.pangaea.de/dds-fdp/rest/panquery?datasetDOI=doi.pangaea.de/10.1594/PANGAEA.842197&filterParameterValue=1,TARA_N000002965
TARA_N000002963	TARA_136	SEQ-(500mL-or-15min)_N5-20	TARA_136_SRF_5-20	Trades Biome	[NPO] North Pacific Ocean	[NPTG] North Pacific Tropical Gyre Province (MRGID:21487)	[SRF] surface water layer (ENVO:00010504)	2011-11-30T22:40	17,0149	-118,9173	5,50	2011-11-30	14:55	24,53	34,52	201,22	-1,15	0,25	0,31	464,17	NA	0,24	53	0,20	https://ws.pangaea.de/dds-fdp/rest/panquery?datasetDOI=doi.pangaea.de/10.1594/PANGAEA.853810&filterParameterValue=1,TARA_N000002963	https://ws.pangaea.de/dds-fdp/rest/panquery?datasetDOI=doi.pangaea.de/10.1594/PANGAEA.858201&filterParameterValue=1,TARA_N000002963	https://ws.pangaea.de/dds-fdp/rest/panquery?datasetDOI=doi.pangaea.de/10.1594/PANGAEA.858207&filterParameterValue=1,TARA_N000002963	https://ws.pangaea.de/dds-fdp/rest/panquery?datasetDOI=doi.pangaea.de/10.1594/PANGAEA.842197&filterParameterValue=1,TARA_N000002963
TARA_N000002934	TARA_137	SEQ-(100L-or-15min)_W>0.8	TARA_137_DCM_0.8-2000	Trades Biome	[NPO] North Pacific Ocean	[PNEC] North Pacific Equatorial Countercurrent Province (MRGID:21488)	[DCM] deep chlorophyll maximum layer (ENVO:01000326)	2011-12-02T20:42	14,2075	-116,6468	39,78	2011-12-02	13:05	20,48	34,39	125,34	6,94	0,66	0,88	509,85	455,52	6,05	3	0,18	https://ws.pangaea.de/dds-fdp/rest/panquery?datasetDOI=doi.pangaea.de/10.1594/PANGAEA.853810&filterParameterValue=1,TARA_N000002934	https://ws.pangaea.de/dds-fdp/rest/panquery?datasetDOI=doi.pangaea.de/10.1594/PANGAEA.858201&filterParameterValue=1,TARA_N000002934	https://ws.pangaea.de/dds-fdp/rest/panquery?datasetDOI=doi.pangaea.de/10.1594/PANGAEA.858207&filterParameterValue=1,TARA_N000002934	https://ws.pangaea.de/dds-fdp/rest/panquery?datasetDOI=doi.pangaea.de/10.1594/PANGAEA.842197&filterParameterValue=1,TARA_N000002934
TARA_N000002942	TARA_137	SEQ-(500mL-or-15min)_N180-2000	TARA_137_DCM_180-2000	Trades Biome	[NPO] North Pacific Ocean	[PNEC] North Pacific Equatorial Countercurrent Province (MRGID:21488)	[DCM] deep chlorophyll maximum layer (ENVO:01000326)	2011-12-02T22:10	14,2005	-116,7031	39,78	2011-12-02	14:33	20,48	34,39	125,34	6,94	0,66	0,88	509,85	455,52	6,05	3	0,18	https://ws.pangaea.de/dds-fdp/rest/panquery?datasetDOI=doi.pangaea.de/10.1594/PANGAEA.853810&filterParameterValue=1,TARA_N000002942	https://ws.pangaea.de/dds-fdp/rest/panquery?datasetDOI=doi.pangaea.de/10.1594/PANGAEA.858201&filterParameterValue=1,TARA_N000002942	https://ws.pangaea.de/dds-fdp/rest/panquery?datasetDOI=doi.pangaea.de/10.1594/PANGAEA.858207&filterParameterValue=1,TARA_N000002942	https://ws.pangaea.de/dds-fdp/rest/panquery?datasetDOI=doi.pangaea.de/10.1594/PANGAEA.842197&filterParameterValue=1,TARA_N000002942
TARA_N000002940	TARA_137	SEQ-(500mL-or-15min)_N20-180	TARA_137_DCM_20-180	Trades Biome	[NPO] North Pacific Ocean	[PNEC] North Pacific Equatorial Countercurrent Province (MRGID:21488)	[DCM] deep chlorophyll maximum layer (ENVO:01000326)	2011-12-02T22:37	14,1987	-116,7164	39,78	2011-12-02	15:00	20,48	34,39	125,34	6,94	0,66	0,88	509,85	455,52	6,05	3	0,18	https://ws.pangaea.de/dds-fdp/rest/panquery?datasetDOI=doi.pangaea.de/10.1594/PANGAEA.853810&filterParameterValue=1,TARA_N000002940	https://ws.pangaea.de/dds-fdp/rest/panquery?datasetDOI=doi.pangaea.de/10.1594/PANGAEA.858201&filterParameterValue=1,TARA_N000002940	https://ws.pangaea.de/dds-fdp/rest/panquery?datasetDOI=doi.pangaea.de/10.1594/PANGAEA.858207&filterParameterValue=1,TARA_N000002940	https://ws.pangaea.de/dds-fdp/rest/panquery?datasetDOI=doi.pangaea.de/10.1594/PANGAEA.842197&filterParameterValue=1,TARA_N000002940
TARA_N000002938	TARA_137	SEQ-(500mL-or-15min)_N5-20	TARA_137_DCM_5-20	Trades Biome	[NPO] North Pacific Ocean	[PNEC] North Pacific Equatorial Countercurrent Province (MRGID:21488)	[DCM] deep chlorophyll maximum layer (ENVO:01000326)	2011-12-02T23:02	14,1957	-116,7293	39,78	2011-12-02	15:25	20,48	34,39	125,34	6,94	0,66	0,88	509,85	455,52	6,05	3	0,18	https://ws.pangaea.de/dds-fdp/rest/panquery?datasetDOI=doi.pangaea.de/10.1594/PANGAEA.853810&filterParameterValue=1,TARA_N000002938	https://ws.pangaea.de/dds-fdp/rest/panquery?datasetDOI=doi.pangaea.de/10.1594/PANGAEA.858201&filterParameterValue=1,TARA_N000002938	https://ws.pangaea.de/dds-fdp/rest/panquery?datasetDOI=doi.pangaea.de/10.1594/PANGAEA.858207&filterParameterValue=1,TARA_N000002938	https://ws.pangaea.de/dds-fdp/rest/panquery?datasetDOI=doi.pangaea.de/10.1594/PANGAEA.842197&filterParameterValue=1,TARA_N000002938
TARA_N000002923	TARA_137	SEQ-(100L-or-15min)_W>0.8	TARA_137_SRF_0.8-2000	Trades Biome	[NPO] North Pacific Ocean	[PNEC] North Pacific Equatorial Countercurrent Province (MRGID:21488)	[SRF] surface water layer (ENVO:00010504)	2011-12-02T14:12	14,2035	-116,6261	5,37	2011-12-03	06:36	26,41	33,88	195,13	3,24	0,29	0,46	509,85	457,79	2,44	4	0,16	https://ws.pangaea.de/dds-fdp/rest/panquery?datasetDOI=doi.pangaea.de/10.1594/PANGAEA.853810&filterParameterValue=1,TARA_N000002923	https://ws.pangaea.de/dds-fdp/rest/panquery?datasetDOI=doi.pangaea.de/10.1594/PANGAEA.858201&filterParameterValue=1,TARA_N000002923	https://ws.pangaea.de/dds-fdp/rest/panquery?datasetDOI=doi.pangaea.de/10.1594/PANGAEA.858207&filterParameterValue=1,TARA_N000002923	https://ws.pangaea.de/dds-fdp/rest/panquery?datasetDOI=doi.pangaea.de/10.1594/PANGAEA.842197&filterParameterValue=1,TARA_N000002923
TARA_N000002925	TARA_137	SEQ-(100L-or-15min)_W0.8-5	TARA_137_SRF_0.8-5	Trades Biome	[NPO] North Pacific Ocean	[PNEC] North Pacific Equatorial Countercurrent Province (MRGID:21488)	[SRF] surface water layer (ENVO:00010504)	2011-12-02T14:12	14,2035	-116,6261	5,37	2011-12-03	06:36	26,41	33,88	195,13	3,24	0,29	0,46	509,85	457,79	2,44	4	0,16	https://ws.pangaea.de/dds-fdp/rest/panquery?datasetDOI=doi.pangaea.de/10.1594/PANGAEA.853810&filterParameterValue=1,TARA_N000002925	https://ws.pangaea.de/dds-fdp/rest/panquery?datasetDOI=doi.pangaea.de/10.1594/PANGAEA.858201&filterParameterValue=1,TARA_N000002925	https://ws.pangaea.de/dds-fdp/rest/panquery?datasetDOI=doi.pangaea.de/10.1594/PANGAEA.858207&filterParameterValue=1,TARA_N000002925	https://ws.pangaea.de/dds-fdp/rest/panquery?datasetDOI=doi.pangaea.de/10.1594/PANGAEA.842197&filterParameterValue=1,TARA_N000002925
TARA_N000002931	TARA_137	SEQ-(500mL-or-15min)_N180-2000	TARA_137_SRF_180-2000	Trades Biome	[NPO] North Pacific Ocean	[PNEC] North Pacific Equatorial Countercurrent Province (MRGID:21488)	[SRF] surface water layer (ENVO:00010504)	2011-12-02T15:11	14,2004	-116,6398	5,37	2011-12-03	07:35	26,41	33,88	195,13	3,24	0,29	0,46	509,85	457,79	2,44	4	0,16	https://ws.pangaea.de/dds-fdp/rest/panquery?datasetDOI=doi.pangaea.de/10.1594/PANGAEA.853810&filterParameterValue=1,TARA_N000002931	https://ws.pangaea.de/dds-fdp/rest/panquery?datasetDOI=doi.pangaea.de/10.1594/PANGAEA.858201&filterParameterValue=1,TARA_N000002931	https://ws.pangaea.de/dds-fdp/rest/panquery?datasetDOI=doi.pangaea.de/10.1594/PANGAEA.858207&filterParameterValue=1,TARA_N000002931	https://ws.pangaea.de/dds-fdp/rest/panquery?datasetDOI=doi.pangaea.de/10.1594/PANGAEA.842197&filterParameterValue=1,TARA_N000002931
TARA_N000002929	TARA_137	SEQ-(500mL-or-15min)_N20-180	TARA_137_SRF_20-180	Trades Biome	[NPO] North Pacific Ocean	[PNEC] North Pacific Equatorial Countercurrent Province (MRGID:21488)	[SRF] surface water layer (ENVO:00010504)	2011-12-02T16:36	14,1927	-116,6474	5,37	2011-12-03	09:00	26,41	33,88	195,13	3,24	0,29	0,46	509,85	457,79	2,44	4	0,16	https://ws.pangaea.de/dds-fdp/rest/panquery?datasetDOI=doi.pangaea.de/10.1594/PANGAEA.853810&filterParameterValue=1,TARA_N000002929	https://ws.pangaea.de/dds-fdp/rest/panquery?datasetDOI=doi.pangaea.de/10.1594/PANGAEA.858201&filterParameterValue=1,TARA_N000002929	https://ws.pangaea.de/dds-fdp/rest/panquery?datasetDOI=doi.pangaea.de/10.1594/PANGAEA.858207&filterParameterValue=1,TARA_N000002929	https://ws.pangaea.de/dds-fdp/rest/panquery?datasetDOI=doi.pangaea.de/10.1594/PANGAEA.842197&filterParameterValue=1,TARA_N000002929
TARA_N000002927	TARA_137	SEQ-(500mL-or-15min)_N5-20	TARA_137_SRF_5-20	Trades Biome	[NPO] North Pacific Ocean	[PNEC] North Pacific Equatorial Countercurrent Province (MRGID:21488)	[SRF] surface water layer (ENVO:00010504)	2011-12-02T17:23	14,1853	-116,6842	5,37	2011-12-03	09:46	26,41	33,88	195,13	3,24	0,29	0,46	509,85	457,79	2,44	4	0,16	https://ws.pangaea.de/dds-fdp/rest/panquery?datasetDOI=doi.pangaea.de/10.1594/PANGAEA.853810&filterParameterValue=1,TARA_N000002927	https://ws.pangaea.de/dds-fdp/rest/panquery?datasetDOI=doi.pangaea.de/10.1594/PANGAEA.858201&filterParameterValue=1,TARA_N000002927	https://ws.pangaea.de/dds-fdp/rest/panquery?datasetDOI=doi.pangaea.de/10.1594/PANGAEA.858207&filterParameterValue=1,TARA_N000002927	https://ws.pangaea.de/dds-fdp/rest/panquery?datasetDOI=doi.pangaea.de/10.1594/PANGAEA.842197&filterParameterValue=1,TARA_N000002927
TARA_N000003011	TARA_138	SEQ-(100L-or-15min)_W0.8-5	TARA_138_DCM_0.8-5	Trades Biome	[NPO] North Pacific Ocean	[PNEC] North Pacific Equatorial Countercurrent Province (MRGID:21488)	[DCM] deep chlorophyll maximum layer (ENVO:01000326)	2011-12-11T13:27:34	6,3378	-102,9538	70,08	2011-12-12	06:42	16,26	34,69	31,15	28,04	0,25	2,05	813,77	234,65	12,90	345	0,64	https://ws.pangaea.de/dds-fdp/rest/panquery?datasetDOI=doi.pangaea.de/10.1594/PANGAEA.853810&filterParameterValue=1,TARA_N000003011	https://ws.pangaea.de/dds-fdp/rest/panquery?datasetDOI=doi.pangaea.de/10.1594/PANGAEA.858201&filterParameterValue=1,TARA_N000003011	https://ws.pangaea.de/dds-fdp/rest/panquery?datasetDOI=doi.pangaea.de/10.1594/PANGAEA.858207&filterParameterValue=1,TARA_N000003011	https://ws.pangaea.de/dds-fdp/rest/panquery?datasetDOI=doi.pangaea.de/10.1594/PANGAEA.842197&filterParameterValue=1,TARA_N000003011
TARA_N000003017	TARA_138	SEQ-(500mL-or-15min)_N180-2000	TARA_138_DCM_180-2000	Trades Biome	[NPO] North Pacific Ocean	[PNEC] North Pacific Equatorial Countercurrent Province (MRGID:21488)	[DCM] deep chlorophyll maximum layer (ENVO:01000326)	2011-12-11T17:39	6,3363	-103,0746	70,08	2011-12-12	10:53	16,26	34,69	31,15	28,04	0,25	2,05	813,77	234,65	12,90	345	0,64	https://ws.pangaea.de/dds-fdp/rest/panquery?datasetDOI=doi.pangaea.de/10.1594/PANGAEA.853810&filterParameterValue=1,TARA_N000003017	https://ws.pangaea.de/dds-fdp/rest/panquery?datasetDOI=doi.pangaea.de/10.1594/PANGAEA.858201&filterParameterValue=1,TARA_N000003017	https://ws.pangaea.de/dds-fdp/rest/panquery?datasetDOI=doi.pangaea.de/10.1594/PANGAEA.858207&filterParameterValue=1,TARA_N000003017	https://ws.pangaea.de/dds-fdp/rest/panquery?datasetDOI=doi.pangaea.de/10.1594/PANGAEA.842197&filterParameterValue=1,TARA_N000003017
TARA_N000003013	TARA_138	SEQ-(500mL-or-15min)_N5-20	TARA_138_DCM_5-20	Trades Biome	[NPO] North Pacific Ocean	[PNEC] North Pacific Equatorial Countercurrent Province (MRGID:21488)	[DCM] deep chlorophyll maximum layer (ENVO:01000326)	2011-12-11T16:27	6,3356	-103,0399	70,08	2011-12-12	09:41	16,26	34,69	31,15	28,04	0,25	2,05	813,77	234,65	12,90	345	0,64	https://ws.pangaea.de/dds-fdp/rest/panquery?datasetDOI=doi.pangaea.de/10.1594/PANGAEA.853810&filterParameterValue=1,TARA_N000003013	https://ws.pangaea.de/dds-fdp/rest/panquery?datasetDOI=doi.pangaea.de/10.1594/PANGAEA.858201&filterParameterValue=1,TARA_N000003013	https://ws.pangaea.de/dds-fdp/rest/panquery?datasetDOI=doi.pangaea.de/10.1594/PANGAEA.858207&filterParameterValue=1,TARA_N000003013	https://ws.pangaea.de/dds-fdp/rest/panquery?datasetDOI=doi.pangaea.de/10.1594/PANGAEA.842197&filterParameterValue=1,TARA_N000003013
TARA_N000003007	TARA_138	SEQ-(500mL-or-15min)_N180-2000	TARA_138_SRF_180-2000	Trades Biome	[NPO] North Pacific Ocean	[PNEC] North Pacific Equatorial Countercurrent Province (MRGID:21488)	[SRF] surface water layer (ENVO:00010504)	2011-12-10T15:06	6,3306	-102,9531	5,35	2011-12-11	08:21	26,64	33,41	196,88	-1,18	0,01	0,16	813,77	234,78	0,00	5	0,31	https://ws.pangaea.de/dds-fdp/rest/panquery?datasetDOI=doi.pangaea.de/10.1594/PANGAEA.853810&filterParameterValue=1,TARA_N000003007	https://ws.pangaea.de/dds-fdp/rest/panquery?datasetDOI=doi.pangaea.de/10.1594/PANGAEA.858201&filterParameterValue=1,TARA_N000003007	https://ws.pangaea.de/dds-fdp/rest/panquery?datasetDOI=doi.pangaea.de/10.1594/PANGAEA.858207&filterParameterValue=1,TARA_N000003007	https://ws.pangaea.de/dds-fdp/rest/panquery?datasetDOI=doi.pangaea.de/10.1594/PANGAEA.842197&filterParameterValue=1,TARA_N000003007
TARA_N000003005	TARA_138	SEQ-(500mL-or-15min)_N20-180	TARA_138_SRF_20-180	Trades Biome	[NPO] North Pacific Ocean	[PNEC] North Pacific Equatorial Countercurrent Province (MRGID:21488)	[SRF] surface water layer (ENVO:00010504)	2011-12-10T16:25	6,3199	-102,96	5,35	2011-12-11	09:40	26,64	33,41	196,88	-1,18	0,01	0,16	813,77	234,78	0,00	5	0,31	https://ws.pangaea.de/dds-fdp/rest/panquery?datasetDOI=doi.pangaea.de/10.1594/PANGAEA.853810&filterParameterValue=1,TARA_N000003005	https://ws.pangaea.de/dds-fdp/rest/panquery?datasetDOI=doi.pangaea.de/10.1594/PANGAEA.858201&filterParameterValue=1,TARA_N000003005	https://ws.pangaea.de/dds-fdp/rest/panquery?datasetDOI=doi.pangaea.de/10.1594/PANGAEA.858207&filterParameterValue=1,TARA_N000003005	https://ws.pangaea.de/dds-fdp/rest/panquery?datasetDOI=doi.pangaea.de/10.1594/PANGAEA.842197&filterParameterValue=1,TARA_N000003005
TARA_N000003003	TARA_138	SEQ-(500mL-or-15min)_N5-20	TARA_138_SRF_5-20	Trades Biome	[NPO] North Pacific Ocean	[PNEC] North Pacific Equatorial Countercurrent Province (MRGID:21488)	[SRF] surface water layer (ENVO:00010504)	2011-12-10T19:34	6,3305	-102,9464	5,35	2011-12-10	12:49	26,64	33,41	196,88	-1,18	0,01	0,16	813,77	234,78	0,00	5	0,31	https://ws.pangaea.de/dds-fdp/rest/panquery?datasetDOI=doi.pangaea.de/10.1594/PANGAEA.853810&filterParameterValue=1,TARA_N000003003	https://ws.pangaea.de/dds-fdp/rest/panquery?datasetDOI=doi.pangaea.de/10.1594/PANGAEA.858201&filterParameterValue=1,TARA_N000003003	https://ws.pangaea.de/dds-fdp/rest/panquery?datasetDOI=doi.pangaea.de/10.1594/PANGAEA.858207&filterParameterValue=1,TARA_N000003003	https://ws.pangaea.de/dds-fdp/rest/panquery?datasetDOI=doi.pangaea.de/10.1594/PANGAEA.842197&filterParameterValue=1,TARA_N000003003
TARA_N000003035	TARA_139	SEQ-(100L-or-15min)_W>0.8	TARA_139_SRF_0.8-2000	Trades Biome	[NPO] North Pacific Ocean	[PNEC] North Pacific Equatorial Countercurrent Province (MRGID:21488)	[SRF] surface water layer (ENVO:00010504)	2011-12-15T14:16	6,4998	-94,9527	5,46	2011-12-16	08:01	26,25	33,18	200,20	3,62	0,58	0,53	631,99	NA	4,11	5	0,19	https://ws.pangaea.de/dds-fdp/rest/panquery?datasetDOI=doi.pangaea.de/10.1594/PANGAEA.853810&filterParameterValue=1,TARA_N000003035	https://ws.pangaea.de/dds-fdp/rest/panquery?datasetDOI=doi.pangaea.de/10.1594/PANGAEA.858201&filterParameterValue=1,TARA_N000003035	https://ws.pangaea.de/dds-fdp/rest/panquery?datasetDOI=doi.pangaea.de/10.1594/PANGAEA.858207&filterParameterValue=1,TARA_N000003035	https://ws.pangaea.de/dds-fdp/rest/panquery?datasetDOI=doi.pangaea.de/10.1594/PANGAEA.842197&filterParameterValue=1,TARA_N000003035
TARA_N000003037	TARA_139	SEQ-(100L-or-15min)_W0.8-5	TARA_139_SRF_0.8-5	Trades Biome	[NPO] North Pacific Ocean	[PNEC] North Pacific Equatorial Countercurrent Province (MRGID:21488)	[SRF] surface water layer (ENVO:00010504)	2011-12-15T14:16	6,4998	-94,9527	5,46	2011-12-16	08:01	26,25	33,18	200,20	3,62	0,58	0,53	631,99	NA	4,11	5	0,19	https://ws.pangaea.de/dds-fdp/rest/panquery?datasetDOI=doi.pangaea.de/10.1594/PANGAEA.853810&filterParameterValue=1,TARA_N000003037	https://ws.pangaea.de/dds-fdp/rest/panquery?datasetDOI=doi.pangaea.de/10.1594/PANGAEA.858201&filterParameterValue=1,TARA_N000003037	https://ws.pangaea.de/dds-fdp/rest/panquery?datasetDOI=doi.pangaea.de/10.1594/PANGAEA.858207&filterParameterValue=1,TARA_N000003037	https://ws.pangaea.de/dds-fdp/rest/panquery?datasetDOI=doi.pangaea.de/10.1594/PANGAEA.842197&filterParameterValue=1,TARA_N000003037
TARA_N000003043	TARA_139	SEQ-(500mL-or-15min)_N180-2000	TARA_139_SRF_180-2000	Trades Biome	[NPO] North Pacific Ocean	[PNEC] North Pacific Equatorial Countercurrent Province (MRGID:21488)	[SRF] surface water layer (ENVO:00010504)	2011-12-15T20:07	6,4946	-95,0463	5,46	2011-12-15	13:51	26,25	33,18	200,20	3,62	0,58	0,53	631,99	NA	4,11	5	0,19	https://ws.pangaea.de/dds-fdp/rest/panquery?datasetDOI=doi.pangaea.de/10.1594/PANGAEA.853810&filterParameterValue=1,TARA_N000003043	https://ws.pangaea.de/dds-fdp/rest/panquery?datasetDOI=doi.pangaea.de/10.1594/PANGAEA.858201&filterParameterValue=1,TARA_N000003043	https://ws.pangaea.de/dds-fdp/rest/panquery?datasetDOI=doi.pangaea.de/10.1594/PANGAEA.858207&filterParameterValue=1,TARA_N000003043	https://ws.pangaea.de/dds-fdp/rest/panquery?datasetDOI=doi.pangaea.de/10.1594/PANGAEA.842197&filterParameterValue=1,TARA_N000003043
TARA_N000003044	TARA_139	SEQ-(500mL-or-15min)_N180-2000	TARA_139_SRF_180-2000	Trades Biome	[NPO] North Pacific Ocean	[PNEC] North Pacific Equatorial Countercurrent Province (MRGID:21488)	[SRF] surface water layer (ENVO:00010504)	2011-12-15T20:07	6,4946	-95,0463	5,46	2011-12-15	13:51	26,25	33,18	200,20	3,62	0,58	0,53	631,99	NA	4,11	5	0,19	https://ws.pangaea.de/dds-fdp/rest/panquery?datasetDOI=doi.pangaea.de/10.1594/PANGAEA.853810&filterParameterValue=1,TARA_N000003044	https://ws.pangaea.de/dds-fdp/rest/panquery?datasetDOI=doi.pangaea.de/10.1594/PANGAEA.858201&filterParameterValue=1,TARA_N000003044	https://ws.pangaea.de/dds-fdp/rest/panquery?datasetDOI=doi.pangaea.de/10.1594/PANGAEA.858207&filterParameterValue=1,TARA_N000003044	https://ws.pangaea.de/dds-fdp/rest/panquery?datasetDOI=doi.pangaea.de/10.1594/PANGAEA.842197&filterParameterValue=1,TARA_N000003044
TARA_N000003039	TARA_139	SEQ-(500mL-or-15min)_N5-20	TARA_139_SRF_5-20	Trades Biome	[NPO] North Pacific Ocean	[PNEC] North Pacific Equatorial Countercurrent Province (MRGID:21488)	[SRF] surface water layer (ENVO:00010504)	2011-12-15T15:25	6,4808	-94,9704	5,46	2011-12-16	09:10	26,25	33,18	200,20	3,62	0,58	0,53	631,99	NA	4,11	5	0,19	https://ws.pangaea.de/dds-fdp/rest/panquery?datasetDOI=doi.pangaea.de/10.1594/PANGAEA.853810&filterParameterValue=1,TARA_N000003039	https://ws.pangaea.de/dds-fdp/rest/panquery?datasetDOI=doi.pangaea.de/10.1594/PANGAEA.858201&filterParameterValue=1,TARA_N000003039	https://ws.pangaea.de/dds-fdp/rest/panquery?datasetDOI=doi.pangaea.de/10.1594/PANGAEA.858207&filterParameterValue=1,TARA_N000003039	https://ws.pangaea.de/dds-fdp/rest/panquery?datasetDOI=doi.pangaea.de/10.1594/PANGAEA.842197&filterParameterValue=1,TARA_N000003039
TARA_N000003104	TARA_142	SEQ-(100L-or-15min)_W0.8-5	TARA_142_DCM_0.8-5	Coastal Biome	[NAO] North Atlantic Ocean	[CARB] Caribbean Province (MRGID:21466)	[DCM] deep chlorophyll maximum layer (ENVO:01000326)	2012-01-09T20:17:16	25,6168	-88,4532	131,16	2012-01-09	14:16	24,93	36,16	193,25	-1,38	0,15	0,02	383,52	323,20	0,06	1097	0,54	https://ws.pangaea.de/dds-fdp/rest/panquery?datasetDOI=doi.pangaea.de/10.1594/PANGAEA.853810&filterParameterValue=1,TARA_N000003104	https://ws.pangaea.de/dds-fdp/rest/panquery?datasetDOI=doi.pangaea.de/10.1594/PANGAEA.858201&filterParameterValue=1,TARA_N000003104	https://ws.pangaea.de/dds-fdp/rest/panquery?datasetDOI=doi.pangaea.de/10.1594/PANGAEA.858207&filterParameterValue=1,TARA_N000003104	https://ws.pangaea.de/dds-fdp/rest/panquery?datasetDOI=doi.pangaea.de/10.1594/PANGAEA.842197&filterParameterValue=1,TARA_N000003104
TARA_N000003098	TARA_142	SEQ-(500mL-or-15min)_N180-2000	TARA_142_DCM_180-2000	Coastal Biome	[NAO] North Atlantic Ocean	[CARB] Caribbean Province (MRGID:21466)	[DCM] deep chlorophyll maximum layer (ENVO:01000326)	2012-01-09T18:52	25,5773	-88,4308	131,16	2012-01-09	12:51	24,93	36,16	193,25	-1,38	0,15	0,02	383,52	323,20	0,06	1097	0,54	https://ws.pangaea.de/dds-fdp/rest/panquery?datasetDOI=doi.pangaea.de/10.1594/PANGAEA.853810&filterParameterValue=1,TARA_N000003098	https://ws.pangaea.de/dds-fdp/rest/panquery?datasetDOI=doi.pangaea.de/10.1594/PANGAEA.858201&filterParameterValue=1,TARA_N000003098	https://ws.pangaea.de/dds-fdp/rest/panquery?datasetDOI=doi.pangaea.de/10.1594/PANGAEA.858207&filterParameterValue=1,TARA_N000003098	https://ws.pangaea.de/dds-fdp/rest/panquery?datasetDOI=doi.pangaea.de/10.1594/PANGAEA.842197&filterParameterValue=1,TARA_N000003098
TARA_N000003100	TARA_142	SEQ-(500mL-or-15min)_N20-180	TARA_142_DCM_20-180	Coastal Biome	[NAO] North Atlantic Ocean	[CARB] Caribbean Province (MRGID:21466)	[DCM] deep chlorophyll maximum layer (ENVO:01000326)	2012-01-09T19:26	25,5921	-88,4388	131,16	2012-01-09	13:25	24,93	36,16	193,25	-1,38	0,15	0,02	383,52	323,20	0,06	1097	0,54	https://ws.pangaea.de/dds-fdp/rest/panquery?datasetDOI=doi.pangaea.de/10.1594/PANGAEA.853810&filterParameterValue=1,TARA_N000003100	https://ws.pangaea.de/dds-fdp/rest/panquery?datasetDOI=doi.pangaea.de/10.1594/PANGAEA.858201&filterParameterValue=1,TARA_N000003100	https://ws.pangaea.de/dds-fdp/rest/panquery?datasetDOI=doi.pangaea.de/10.1594/PANGAEA.858207&filterParameterValue=1,TARA_N000003100	https://ws.pangaea.de/dds-fdp/rest/panquery?datasetDOI=doi.pangaea.de/10.1594/PANGAEA.842197&filterParameterValue=1,TARA_N000003100
TARA_N000003102	TARA_142	SEQ-(500mL-or-15min)_W5-20	TARA_142_DCM_5-20	Coastal Biome	[NAO] North Atlantic Ocean	[CARB] Caribbean Province (MRGID:21466)	[DCM] deep chlorophyll maximum layer (ENVO:01000326)	2012-01-09T20:17:16	25,6168	-88,4532	131,16	2012-01-09	14:16	24,93	36,16	193,25	-1,38	0,15	0,02	383,52	323,20	0,06	1097	0,54	https://ws.pangaea.de/dds-fdp/rest/panquery?datasetDOI=doi.pangaea.de/10.1594/PANGAEA.853810&filterParameterValue=1,TARA_N000003102	https://ws.pangaea.de/dds-fdp/rest/panquery?datasetDOI=doi.pangaea.de/10.1594/PANGAEA.858201&filterParameterValue=1,TARA_N000003102	https://ws.pangaea.de/dds-fdp/rest/panquery?datasetDOI=doi.pangaea.de/10.1594/PANGAEA.858207&filterParameterValue=1,TARA_N000003102	https://ws.pangaea.de/dds-fdp/rest/panquery?datasetDOI=doi.pangaea.de/10.1594/PANGAEA.842197&filterParameterValue=1,TARA_N000003102
TARA_N000003081	TARA_142	SEQ-(100L-or-15min)_W>0.8	TARA_142_SRF_0.8-2000	Coastal Biome	[NAO] North Atlantic Ocean	[CARB] Caribbean Province (MRGID:21466)	[SRF] surface water layer (ENVO:00010504)	2012-01-09T13:41	25,5264	-88394	5,44	2012-01-10	07:40	24,97	36,19	194,27	-2,21	0,16	0,00	383,52	320,28	0,05	1169	0,35	https://ws.pangaea.de/dds-fdp/rest/panquery?datasetDOI=doi.pangaea.de/10.1594/PANGAEA.853810&filterParameterValue=1,TARA_N000003081	https://ws.pangaea.de/dds-fdp/rest/panquery?datasetDOI=doi.pangaea.de/10.1594/PANGAEA.858201&filterParameterValue=1,TARA_N000003081	https://ws.pangaea.de/dds-fdp/rest/panquery?datasetDOI=doi.pangaea.de/10.1594/PANGAEA.858207&filterParameterValue=1,TARA_N000003081	https://ws.pangaea.de/dds-fdp/rest/panquery?datasetDOI=doi.pangaea.de/10.1594/PANGAEA.842197&filterParameterValue=1,TARA_N000003081
TARA_N000003083	TARA_142	SEQ-(100L-or-15min)_W0.8-5	TARA_142_SRF_0.8-5	Coastal Biome	[NAO] North Atlantic Ocean	[CARB] Caribbean Province (MRGID:21466)	[SRF] surface water layer (ENVO:00010504)	2012-01-09T13:41	25,5264	-88394	5,44	2012-01-10	07:40	24,97	36,19	194,27	-2,21	0,16	0,00	383,52	320,28	0,05	1169	0,35	https://ws.pangaea.de/dds-fdp/rest/panquery?datasetDOI=doi.pangaea.de/10.1594/PANGAEA.853810&filterParameterValue=1,TARA_N000003083	https://ws.pangaea.de/dds-fdp/rest/panquery?datasetDOI=doi.pangaea.de/10.1594/PANGAEA.858201&filterParameterValue=1,TARA_N000003083	https://ws.pangaea.de/dds-fdp/rest/panquery?datasetDOI=doi.pangaea.de/10.1594/PANGAEA.858207&filterParameterValue=1,TARA_N000003083	https://ws.pangaea.de/dds-fdp/rest/panquery?datasetDOI=doi.pangaea.de/10.1594/PANGAEA.842197&filterParameterValue=1,TARA_N000003083
TARA_N000003089	TARA_142	SEQ-(500mL-or-15min)_N180-2000	TARA_142_SRF_180-2000	Coastal Biome	[NAO] North Atlantic Ocean	[CARB] Caribbean Province (MRGID:21466)	[SRF] surface water layer (ENVO:00010504)	2012-01-09T15:04	25,5593	-88,4126	5,44	2012-01-10	09:03	24,97	36,19	194,27	-2,21	0,16	0,00	383,52	320,28	0,05	1169	0,35	https://ws.pangaea.de/dds-fdp/rest/panquery?datasetDOI=doi.pangaea.de/10.1594/PANGAEA.853810&filterParameterValue=1,TARA_N000003089	https://ws.pangaea.de/dds-fdp/rest/panquery?datasetDOI=doi.pangaea.de/10.1594/PANGAEA.858201&filterParameterValue=1,TARA_N000003089	https://ws.pangaea.de/dds-fdp/rest/panquery?datasetDOI=doi.pangaea.de/10.1594/PANGAEA.858207&filterParameterValue=1,TARA_N000003089	https://ws.pangaea.de/dds-fdp/rest/panquery?datasetDOI=doi.pangaea.de/10.1594/PANGAEA.842197&filterParameterValue=1,TARA_N000003089
TARA_N000003087	TARA_142	SEQ-(500mL-or-15min)_N20-180	TARA_142_SRF_20-180	Coastal Biome	[NAO] North Atlantic Ocean	[CARB] Caribbean Province (MRGID:21466)	[SRF] surface water layer (ENVO:00010504)	2012-01-09T16:13	25,5877	-88,4275	5,44	2012-01-10	10:12	24,97	36,19	194,27	-2,21	0,16	0,00	383,52	320,28	0,05	1169	0,35	https://ws.pangaea.de/dds-fdp/rest/panquery?datasetDOI=doi.pangaea.de/10.1594/PANGAEA.853810&filterParameterValue=1,TARA_N000003087	https://ws.pangaea.de/dds-fdp/rest/panquery?datasetDOI=doi.pangaea.de/10.1594/PANGAEA.858201&filterParameterValue=1,TARA_N000003087	https://ws.pangaea.de/dds-fdp/rest/panquery?datasetDOI=doi.pangaea.de/10.1594/PANGAEA.858207&filterParameterValue=1,TARA_N000003087	https://ws.pangaea.de/dds-fdp/rest/panquery?datasetDOI=doi.pangaea.de/10.1594/PANGAEA.842197&filterParameterValue=1,TARA_N000003087
TARA_N000003148	TARA_143	SEQ-(500mL-or-15min)_N180-2000	TARA_143_DCM_180-2000	Coastal Biome	[NAO] North Atlantic Ocean	[CHSB] Cheasapeake Bay Province	[DCM] deep chlorophyll maximum layer (ENVO:01000326)	2012-01-16T20:52	29,8253	-79,6833	39,72	2012-01-16	15:23	24,79	36,21	195,14	0,68	0,15	0,00	147,70	NA	0,06	1242	0,06	https://ws.pangaea.de/dds-fdp/rest/panquery?datasetDOI=doi.pangaea.de/10.1594/PANGAEA.853810&filterParameterValue=1,TARA_N000003148	https://ws.pangaea.de/dds-fdp/rest/panquery?datasetDOI=doi.pangaea.de/10.1594/PANGAEA.858201&filterParameterValue=1,TARA_N000003148	https://ws.pangaea.de/dds-fdp/rest/panquery?datasetDOI=doi.pangaea.de/10.1594/PANGAEA.858207&filterParameterValue=1,TARA_N000003148	https://ws.pangaea.de/dds-fdp/rest/panquery?datasetDOI=doi.pangaea.de/10.1594/PANGAEA.842197&filterParameterValue=1,TARA_N000003148
TARA_N000003156	TARA_143	SEQ-(500mL-or-15min)_N20-180	TARA_143_DCM_20-180	Coastal Biome	[NAO] North Atlantic Ocean	[CHSB] Cheasapeake Bay Province	[DCM] deep chlorophyll maximum layer (ENVO:01000326)	2012-01-16T19:44	29,7902	-79,6437	39,72	2012-01-16	14:15	24,79	36,21	195,14	0,68	0,15	0,00	147,70	NA	0,06	1242	0,06	https://ws.pangaea.de/dds-fdp/rest/panquery?datasetDOI=doi.pangaea.de/10.1594/PANGAEA.853810&filterParameterValue=1,TARA_N000003156	https://ws.pangaea.de/dds-fdp/rest/panquery?datasetDOI=doi.pangaea.de/10.1594/PANGAEA.858201&filterParameterValue=1,TARA_N000003156	https://ws.pangaea.de/dds-fdp/rest/panquery?datasetDOI=doi.pangaea.de/10.1594/PANGAEA.858207&filterParameterValue=1,TARA_N000003156	https://ws.pangaea.de/dds-fdp/rest/panquery?datasetDOI=doi.pangaea.de/10.1594/PANGAEA.842197&filterParameterValue=1,TARA_N000003156
TARA_N000003146	TARA_143	SEQ-(500mL-or-15min)_N5-20	TARA_143_DCM_5-20	Coastal Biome	[NAO] North Atlantic Ocean	[CHSB] Cheasapeake Bay Province	[DCM] deep chlorophyll maximum layer (ENVO:01000326)	2012-01-16T20:24	29,8103	-79668	39,72	2012-01-16	14:55	24,79	36,21	195,14	0,68	0,15	0,00	147,70	NA	0,06	1242	0,06	https://ws.pangaea.de/dds-fdp/rest/panquery?datasetDOI=doi.pangaea.de/10.1594/PANGAEA.853810&filterParameterValue=1,TARA_N000003146	https://ws.pangaea.de/dds-fdp/rest/panquery?datasetDOI=doi.pangaea.de/10.1594/PANGAEA.858201&filterParameterValue=1,TARA_N000003146	https://ws.pangaea.de/dds-fdp/rest/panquery?datasetDOI=doi.pangaea.de/10.1594/PANGAEA.858207&filterParameterValue=1,TARA_N000003146	https://ws.pangaea.de/dds-fdp/rest/panquery?datasetDOI=doi.pangaea.de/10.1594/PANGAEA.842197&filterParameterValue=1,TARA_N000003146
TARA_N000003141	TARA_143	SEQ-(500mL-or-15min)_N180-2000	TARA_143_SRF_180-2000	Coastal Biome	[NAO] North Atlantic Ocean	[CHSB] Cheasapeake Bay Province	[SRF] surface water layer (ENVO:00010504)	2012-01-16T14:25	29,6721	-79,5929	5,45	2012-01-17	08:57	25,00	36,21	192,00	1,19	0,16	0,01	147,70	NA	0,06	1242	0,03	https://ws.pangaea.de/dds-fdp/rest/panquery?datasetDOI=doi.pangaea.de/10.1594/PANGAEA.853810&filterParameterValue=1,TARA_N000003141	https://ws.pangaea.de/dds-fdp/rest/panquery?datasetDOI=doi.pangaea.de/10.1594/PANGAEA.858201&filterParameterValue=1,TARA_N000003141	https://ws.pangaea.de/dds-fdp/rest/panquery?datasetDOI=doi.pangaea.de/10.1594/PANGAEA.858207&filterParameterValue=1,TARA_N000003141	https://ws.pangaea.de/dds-fdp/rest/panquery?datasetDOI=doi.pangaea.de/10.1594/PANGAEA.842197&filterParameterValue=1,TARA_N000003141
TARA_N000003153	TARA_143	SEQ-(500mL-or-15min)_N20-180	TARA_143_SRF_20-180	Coastal Biome	[NAO] North Atlantic Ocean	[CHSB] Cheasapeake Bay Province	[SRF] surface water layer (ENVO:00010504)	2012-01-16T19:22	29,7812	-79,6299	5,45	2012-01-16	13:53	25,00	36,21	192,00	1,19	0,16	0,01	147,70	NA	0,06	1242	0,03	https://ws.pangaea.de/dds-fdp/rest/panquery?datasetDOI=doi.pangaea.de/10.1594/PANGAEA.853810&filterParameterValue=1,TARA_N000003153	https://ws.pangaea.de/dds-fdp/rest/panquery?datasetDOI=doi.pangaea.de/10.1594/PANGAEA.858201&filterParameterValue=1,TARA_N000003153	https://ws.pangaea.de/dds-fdp/rest/panquery?datasetDOI=doi.pangaea.de/10.1594/PANGAEA.858207&filterParameterValue=1,TARA_N000003153	https://ws.pangaea.de/dds-fdp/rest/panquery?datasetDOI=doi.pangaea.de/10.1594/PANGAEA.842197&filterParameterValue=1,TARA_N000003153
TARA_N000003139	TARA_143	SEQ-(500mL-or-15min)_N5-20	TARA_143_SRF_5-20	Coastal Biome	[NAO] North Atlantic Ocean	[CHSB] Cheasapeake Bay Province	[SRF] surface water layer (ENVO:00010504)	2012-01-16T16:49	29,7186	-79,6636	5,45	2012-01-17	11:20	25,00	36,21	192,00	1,19	0,16	0,01	147,70	NA	0,06	1242	0,03	https://ws.pangaea.de/dds-fdp/rest/panquery?datasetDOI=doi.pangaea.de/10.1594/PANGAEA.853810&filterParameterValue=1,TARA_N000003139	https://ws.pangaea.de/dds-fdp/rest/panquery?datasetDOI=doi.pangaea.de/10.1594/PANGAEA.858201&filterParameterValue=1,TARA_N000003139	https://ws.pangaea.de/dds-fdp/rest/panquery?datasetDOI=doi.pangaea.de/10.1594/PANGAEA.858207&filterParameterValue=1,TARA_N000003139	https://ws.pangaea.de/dds-fdp/rest/panquery?datasetDOI=doi.pangaea.de/10.1594/PANGAEA.842197&filterParameterValue=1,TARA_N000003139
TARA_N000003175	TARA_144	SEQ-(100L-or-15min)_W>0.8	TARA_144_SRF_0.8-2000	Coastal Biome	[NAO] North Atlantic Ocean	[CHSB] Cheasapeake Bay Province	[SRF] surface water layer (ENVO:00010504)	2012-01-29T20:01	36,3698	-72,9669	5,50	2012-01-29	14:56	22,55	36,41	202,48	-0,01	0,19	0,00	255,44	NA	0,02	1002	0,13	https://ws.pangaea.de/dds-fdp/rest/panquery?datasetDOI=doi.pangaea.de/10.1594/PANGAEA.853810&filterParameterValue=1,TARA_N000003175	https://ws.pangaea.de/dds-fdp/rest/panquery?datasetDOI=doi.pangaea.de/10.1594/PANGAEA.858201&filterParameterValue=1,TARA_N000003175	https://ws.pangaea.de/dds-fdp/rest/panquery?datasetDOI=doi.pangaea.de/10.1594/PANGAEA.858207&filterParameterValue=1,TARA_N000003175	https://ws.pangaea.de/dds-fdp/rest/panquery?datasetDOI=doi.pangaea.de/10.1594/PANGAEA.842197&filterParameterValue=1,TARA_N000003175
TARA_N000003179	TARA_144	SEQ-(100L-or-15min)_W0.8-5	TARA_144_SRF_0.8-5	Coastal Biome	[NAO] North Atlantic Ocean	[CHSB] Cheasapeake Bay Province	[SRF] surface water layer (ENVO:00010504)	2012-01-29T20:01	36,3698	-72,9669	5,50	2012-01-29	14:56	22,55	36,41	202,48	-0,01	0,19	0,00	255,44	NA	0,02	1002	0,13	https://ws.pangaea.de/dds-fdp/rest/panquery?datasetDOI=doi.pangaea.de/10.1594/PANGAEA.853810&filterParameterValue=1,TARA_N000003179	https://ws.pangaea.de/dds-fdp/rest/panquery?datasetDOI=doi.pangaea.de/10.1594/PANGAEA.858201&filterParameterValue=1,TARA_N000003179	https://ws.pangaea.de/dds-fdp/rest/panquery?datasetDOI=doi.pangaea.de/10.1594/PANGAEA.858207&filterParameterValue=1,TARA_N000003179	https://ws.pangaea.de/dds-fdp/rest/panquery?datasetDOI=doi.pangaea.de/10.1594/PANGAEA.842197&filterParameterValue=1,TARA_N000003179
TARA_N000003191	TARA_144	SEQ-(500mL-or-15min)_N180-2000	TARA_144_SRF_180-2000	Coastal Biome	[NAO] North Atlantic Ocean	[CHSB] Cheasapeake Bay Province	[SRF] surface water layer (ENVO:00010504)	2012-01-30T02:39	36345	-72,7586	5,50	2012-01-30	21:34	22,55	36,41	202,48	-0,01	0,19	0,00	255,44	NA	0,02	1002	0,13	https://ws.pangaea.de/dds-fdp/rest/panquery?datasetDOI=doi.pangaea.de/10.1594/PANGAEA.853810&filterParameterValue=1,TARA_N000003191	https://ws.pangaea.de/dds-fdp/rest/panquery?datasetDOI=doi.pangaea.de/10.1594/PANGAEA.858201&filterParameterValue=1,TARA_N000003191	https://ws.pangaea.de/dds-fdp/rest/panquery?datasetDOI=doi.pangaea.de/10.1594/PANGAEA.858207&filterParameterValue=1,TARA_N000003191	https://ws.pangaea.de/dds-fdp/rest/panquery?datasetDOI=doi.pangaea.de/10.1594/PANGAEA.842197&filterParameterValue=1,TARA_N000003191
TARA_N000003187	TARA_144	SEQ-(500mL-or-15min)_N20-180	TARA_144_SRF_20-180	Coastal Biome	[NAO] North Atlantic Ocean	[CHSB] Cheasapeake Bay Province	[SRF] surface water layer (ENVO:00010504)	2012-01-30T00:10	36,3385	-72,7366	5,50	2012-01-30	19:05	22,55	36,41	202,48	-0,01	0,19	0,00	255,44	NA	0,02	1002	0,13	https://ws.pangaea.de/dds-fdp/rest/panquery?datasetDOI=doi.pangaea.de/10.1594/PANGAEA.853810&filterParameterValue=1,TARA_N000003187	https://ws.pangaea.de/dds-fdp/rest/panquery?datasetDOI=doi.pangaea.de/10.1594/PANGAEA.858201&filterParameterValue=1,TARA_N000003187	https://ws.pangaea.de/dds-fdp/rest/panquery?datasetDOI=doi.pangaea.de/10.1594/PANGAEA.858207&filterParameterValue=1,TARA_N000003187	https://ws.pangaea.de/dds-fdp/rest/panquery?datasetDOI=doi.pangaea.de/10.1594/PANGAEA.842197&filterParameterValue=1,TARA_N000003187
TARA_N000003183	TARA_144	SEQ-(500mL-or-15min)_N5-20	TARA_144_SRF_5-20	Coastal Biome	[NAO] North Atlantic Ocean	[CHSB] Cheasapeake Bay Province	[SRF] surface water layer (ENVO:00010504)	2012-01-29T22:46	36,3489	-72,7896	5,50	2012-01-29	17:41	22,55	36,41	202,48	-0,01	0,19	0,00	255,44	NA	0,02	1002	0,13	https://ws.pangaea.de/dds-fdp/rest/panquery?datasetDOI=doi.pangaea.de/10.1594/PANGAEA.853810&filterParameterValue=1,TARA_N000003183	https://ws.pangaea.de/dds-fdp/rest/panquery?datasetDOI=doi.pangaea.de/10.1594/PANGAEA.858201&filterParameterValue=1,TARA_N000003183	https://ws.pangaea.de/dds-fdp/rest/panquery?datasetDOI=doi.pangaea.de/10.1594/PANGAEA.858207&filterParameterValue=1,TARA_N000003183	https://ws.pangaea.de/dds-fdp/rest/panquery?datasetDOI=doi.pangaea.de/10.1594/PANGAEA.842197&filterParameterValue=1,TARA_N000003183
TARA_N000003215	TARA_145	SEQ-(100L-or-15min)_W>0.8	TARA_145_SRF_0.8-2000	Westerlies Biome	[NAO] North Atlantic Ocean	[GFST] Gulf Stream Province (MRGID:21454)	[SRF] surface water layer (ENVO:00010504)	2012-02-02T11:52	39,2305	-70,0377	5,33	2012-02-03	06:58	14,08	35,15	235,07	5,04	0,32	0,35	228,16	378,05	4,38	895	0,24	https://ws.pangaea.de/dds-fdp/rest/panquery?datasetDOI=doi.pangaea.de/10.1594/PANGAEA.853810&filterParameterValue=1,TARA_N000003215	https://ws.pangaea.de/dds-fdp/rest/panquery?datasetDOI=doi.pangaea.de/10.1594/PANGAEA.858201&filterParameterValue=1,TARA_N000003215	https://ws.pangaea.de/dds-fdp/rest/panquery?datasetDOI=doi.pangaea.de/10.1594/PANGAEA.858207&filterParameterValue=1,TARA_N000003215	https://ws.pangaea.de/dds-fdp/rest/panquery?datasetDOI=doi.pangaea.de/10.1594/PANGAEA.842197&filterParameterValue=1,TARA_N000003215
TARA_N000003219	TARA_145	SEQ-(100L-or-15min)_W0.8-5	TARA_145_SRF_0.8-5	Westerlies Biome	[NAO] North Atlantic Ocean	[GFST] Gulf Stream Province (MRGID:21454)	[SRF] surface water layer (ENVO:00010504)	2012-02-02T11:52	39,2305	-70,0377	5,33	2012-02-03	06:58	14,08	35,15	235,07	5,04	0,32	0,35	228,16	378,05	4,38	895	0,24	https://ws.pangaea.de/dds-fdp/rest/panquery?datasetDOI=doi.pangaea.de/10.1594/PANGAEA.853810&filterParameterValue=1,TARA_N000003219	https://ws.pangaea.de/dds-fdp/rest/panquery?datasetDOI=doi.pangaea.de/10.1594/PANGAEA.858201&filterParameterValue=1,TARA_N000003219	https://ws.pangaea.de/dds-fdp/rest/panquery?datasetDOI=doi.pangaea.de/10.1594/PANGAEA.858207&filterParameterValue=1,TARA_N000003219	https://ws.pangaea.de/dds-fdp/rest/panquery?datasetDOI=doi.pangaea.de/10.1594/PANGAEA.842197&filterParameterValue=1,TARA_N000003219
TARA_N000003231	TARA_145	SEQ-(500mL-or-15min)_N180-2000	TARA_145_SRF_180-2000	Westerlies Biome	[NAO] North Atlantic Ocean	[GFST] Gulf Stream Province (MRGID:21454)	[SRF] surface water layer (ENVO:00010504)	2012-02-02T13:48	39,2214	-70,0322	5,33	2012-02-03	08:54	14,08	35,15	235,07	5,04	0,32	0,35	228,16	378,05	4,38	895	0,24	https://ws.pangaea.de/dds-fdp/rest/panquery?datasetDOI=doi.pangaea.de/10.1594/PANGAEA.853810&filterParameterValue=1,TARA_N000003231	https://ws.pangaea.de/dds-fdp/rest/panquery?datasetDOI=doi.pangaea.de/10.1594/PANGAEA.858201&filterParameterValue=1,TARA_N000003231	https://ws.pangaea.de/dds-fdp/rest/panquery?datasetDOI=doi.pangaea.de/10.1594/PANGAEA.858207&filterParameterValue=1,TARA_N000003231	https://ws.pangaea.de/dds-fdp/rest/panquery?datasetDOI=doi.pangaea.de/10.1594/PANGAEA.842197&filterParameterValue=1,TARA_N000003231
TARA_N000003227	TARA_145	SEQ-(500mL-or-15min)_N20-180	TARA_145_SRF_20-180	Westerlies Biome	[NAO] North Atlantic Ocean	[GFST] Gulf Stream Province (MRGID:21454)	[SRF] surface water layer (ENVO:00010504)	2012-02-02T14:46	39,2077	-70034	5,33	2012-02-03	09:52	14,08	35,15	235,07	5,04	0,32	0,35	228,16	378,05	4,38	895	0,24	https://ws.pangaea.de/dds-fdp/rest/panquery?datasetDOI=doi.pangaea.de/10.1594/PANGAEA.853810&filterParameterValue=1,TARA_N000003227	https://ws.pangaea.de/dds-fdp/rest/panquery?datasetDOI=doi.pangaea.de/10.1594/PANGAEA.858201&filterParameterValue=1,TARA_N000003227	https://ws.pangaea.de/dds-fdp/rest/panquery?datasetDOI=doi.pangaea.de/10.1594/PANGAEA.858207&filterParameterValue=1,TARA_N000003227	https://ws.pangaea.de/dds-fdp/rest/panquery?datasetDOI=doi.pangaea.de/10.1594/PANGAEA.842197&filterParameterValue=1,TARA_N000003227
TARA_N000003223	TARA_145	SEQ-(500mL-or-15min)_N5-20	TARA_145_SRF_5-20	Westerlies Biome	[NAO] North Atlantic Ocean	[GFST] Gulf Stream Province (MRGID:21454)	[SRF] surface water layer (ENVO:00010504)	2012-02-02T15:44	39194	-70,0499	5,33	2012-02-03	10:50	14,08	35,15	235,07	5,04	0,32	0,35	228,16	378,05	4,38	895	0,24	https://ws.pangaea.de/dds-fdp/rest/panquery?datasetDOI=doi.pangaea.de/10.1594/PANGAEA.853810&filterParameterValue=1,TARA_N000003223	https://ws.pangaea.de/dds-fdp/rest/panquery?datasetDOI=doi.pangaea.de/10.1594/PANGAEA.858201&filterParameterValue=1,TARA_N000003223	https://ws.pangaea.de/dds-fdp/rest/panquery?datasetDOI=doi.pangaea.de/10.1594/PANGAEA.858207&filterParameterValue=1,TARA_N000003223	https://ws.pangaea.de/dds-fdp/rest/panquery?datasetDOI=doi.pangaea.de/10.1594/PANGAEA.842197&filterParameterValue=1,TARA_N000003223
TARA_N000003253	TARA_146	SEQ-(100L-or-15min)_W0.8-5	TARA_146_SRF_0.8-5	Westerlies Biome	[NAO] North Atlantic Ocean	[GFST] Gulf Stream Province (MRGID:21454)	[SRF] surface water layer (ENVO:00010504)	2012-02-15T12:54	34,6712	-71,3093	5,48	2012-02-16	07:54	19,44	36,54	213,80	0,81	0,13	0,02	393,87	391,97	0,74	1104	0,05	https://ws.pangaea.de/dds-fdp/rest/panquery?datasetDOI=doi.pangaea.de/10.1594/PANGAEA.853810&filterParameterValue=1,TARA_N000003253	https://ws.pangaea.de/dds-fdp/rest/panquery?datasetDOI=doi.pangaea.de/10.1594/PANGAEA.858201&filterParameterValue=1,TARA_N000003253	https://ws.pangaea.de/dds-fdp/rest/panquery?datasetDOI=doi.pangaea.de/10.1594/PANGAEA.858207&filterParameterValue=1,TARA_N000003253	https://ws.pangaea.de/dds-fdp/rest/panquery?datasetDOI=doi.pangaea.de/10.1594/PANGAEA.842197&filterParameterValue=1,TARA_N000003253
TARA_N000003240	TARA_146	SEQ-(500mL-or-15min)_N180-2000	TARA_146_SRF_180-2000	Westerlies Biome	[NAO] North Atlantic Ocean	[GFST] Gulf Stream Province (MRGID:21454)	[SRF] surface water layer (ENVO:00010504)	2012-02-15T15:15	34,7631	-71,2422	5,48	2012-02-16	10:15	19,44	36,54	213,80	0,81	0,13	0,02	393,87	391,97	0,74	1104	0,05	https://ws.pangaea.de/dds-fdp/rest/panquery?datasetDOI=doi.pangaea.de/10.1594/PANGAEA.853810&filterParameterValue=1,TARA_N000003240	https://ws.pangaea.de/dds-fdp/rest/panquery?datasetDOI=doi.pangaea.de/10.1594/PANGAEA.858201&filterParameterValue=1,TARA_N000003240	https://ws.pangaea.de/dds-fdp/rest/panquery?datasetDOI=doi.pangaea.de/10.1594/PANGAEA.858207&filterParameterValue=1,TARA_N000003240	https://ws.pangaea.de/dds-fdp/rest/panquery?datasetDOI=doi.pangaea.de/10.1594/PANGAEA.842197&filterParameterValue=1,TARA_N000003240
TARA_N000003246	TARA_146	SEQ-(500mL-or-15min)_N20-180	TARA_146_SRF_20-180	Westerlies Biome	[NAO] North Atlantic Ocean	[GFST] Gulf Stream Province (MRGID:21454)	[SRF] surface water layer (ENVO:00010504)	2012-02-15T16:08	34,7942	-71,2229	5,48	2012-02-16	11:08	19,44	36,54	213,80	0,81	0,13	0,02	393,87	391,97	0,74	1104	0,05	https://ws.pangaea.de/dds-fdp/rest/panquery?datasetDOI=doi.pangaea.de/10.1594/PANGAEA.853810&filterParameterValue=1,TARA_N000003246	https://ws.pangaea.de/dds-fdp/rest/panquery?datasetDOI=doi.pangaea.de/10.1594/PANGAEA.858201&filterParameterValue=1,TARA_N000003246	https://ws.pangaea.de/dds-fdp/rest/panquery?datasetDOI=doi.pangaea.de/10.1594/PANGAEA.858207&filterParameterValue=1,TARA_N000003246	https://ws.pangaea.de/dds-fdp/rest/panquery?datasetDOI=doi.pangaea.de/10.1594/PANGAEA.842197&filterParameterValue=1,TARA_N000003246
TARA_N000003257	TARA_146	SEQ-(500mL-or-15min)_N5-20	TARA_146_SRF_5-20	Westerlies Biome	[NAO] North Atlantic Ocean	[GFST] Gulf Stream Province (MRGID:21454)	[SRF] surface water layer (ENVO:00010504)	2012-02-15T16:49	34,8217	-71,21	5,48	2012-02-16	11:50	19,44	36,54	213,80	0,81	0,13	0,02	393,87	391,97	0,74	1104	0,05	https://ws.pangaea.de/dds-fdp/rest/panquery?datasetDOI=doi.pangaea.de/10.1594/PANGAEA.853810&filterParameterValue=1,TARA_N000003257	https://ws.pangaea.de/dds-fdp/rest/panquery?datasetDOI=doi.pangaea.de/10.1594/PANGAEA.858201&filterParameterValue=1,TARA_N000003257	https://ws.pangaea.de/dds-fdp/rest/panquery?datasetDOI=doi.pangaea.de/10.1594/PANGAEA.858207&filterParameterValue=1,TARA_N000003257	https://ws.pangaea.de/dds-fdp/rest/panquery?datasetDOI=doi.pangaea.de/10.1594/PANGAEA.842197&filterParameterValue=1,TARA_N000003257
TARA_N000002101	TARA_147	SEQ-(100L-or-15min)_W>0.8	TARA_147_SRF_0.8-2000	Westerlies Biome	[NAO] North Atlantic Ocean	[NAST-W] North Atlantic Subtropical Gyral Province (MRGID:21455)	[SRF] surface water layer (ENVO:00010504)	2012-02-18T14:22	33061	-66,5435	5,51	2012-02-19	09:41	20,12	36,57	213,26	-0,96	0,12	0,00	174,82	NA	0,40	1076	0,03	https://ws.pangaea.de/dds-fdp/rest/panquery?datasetDOI=doi.pangaea.de/10.1594/PANGAEA.853810&filterParameterValue=1,TARA_N000002101	https://ws.pangaea.de/dds-fdp/rest/panquery?datasetDOI=doi.pangaea.de/10.1594/PANGAEA.858201&filterParameterValue=1,TARA_N000002101	https://ws.pangaea.de/dds-fdp/rest/panquery?datasetDOI=doi.pangaea.de/10.1594/PANGAEA.858207&filterParameterValue=1,TARA_N000002101	https://ws.pangaea.de/dds-fdp/rest/panquery?datasetDOI=doi.pangaea.de/10.1594/PANGAEA.842197&filterParameterValue=1,TARA_N000002101
TARA_N000002103	TARA_147	SEQ-(100L-or-15min)_W0.8-5	TARA_147_SRF_0.8-5	Westerlies Biome	[NAO] North Atlantic Ocean	[NAST-W] North Atlantic Subtropical Gyral Province (MRGID:21455)	[SRF] surface water layer (ENVO:00010504)	2012-02-18T14:22	33061	-66,5435	5,51	2012-02-19	09:41	20,12	36,57	213,26	-0,96	0,12	0,00	174,82	NA	0,40	1076	0,03	https://ws.pangaea.de/dds-fdp/rest/panquery?datasetDOI=doi.pangaea.de/10.1594/PANGAEA.853810&filterParameterValue=1,TARA_N000002103	https://ws.pangaea.de/dds-fdp/rest/panquery?datasetDOI=doi.pangaea.de/10.1594/PANGAEA.858201&filterParameterValue=1,TARA_N000002103	https://ws.pangaea.de/dds-fdp/rest/panquery?datasetDOI=doi.pangaea.de/10.1594/PANGAEA.858207&filterParameterValue=1,TARA_N000002103	https://ws.pangaea.de/dds-fdp/rest/panquery?datasetDOI=doi.pangaea.de/10.1594/PANGAEA.842197&filterParameterValue=1,TARA_N000002103
TARA_N000002109	TARA_147	SEQ-(500mL-or-15min)_N180-2000	TARA_147_SRF_180-2000	Westerlies Biome	[NAO] North Atlantic Ocean	[NAST-W] North Atlantic Subtropical Gyral Province (MRGID:21455)	[SRF] surface water layer (ENVO:00010504)	2012-02-18T19:10	33,0096	-66547	5,51	2012-02-18	14:29	20,12	36,57	213,26	-0,96	0,12	0,00	174,82	NA	0,40	1076	0,03	https://ws.pangaea.de/dds-fdp/rest/panquery?datasetDOI=doi.pangaea.de/10.1594/PANGAEA.853810&filterParameterValue=1,TARA_N000002109	https://ws.pangaea.de/dds-fdp/rest/panquery?datasetDOI=doi.pangaea.de/10.1594/PANGAEA.858201&filterParameterValue=1,TARA_N000002109	https://ws.pangaea.de/dds-fdp/rest/panquery?datasetDOI=doi.pangaea.de/10.1594/PANGAEA.858207&filterParameterValue=1,TARA_N000002109	https://ws.pangaea.de/dds-fdp/rest/panquery?datasetDOI=doi.pangaea.de/10.1594/PANGAEA.842197&filterParameterValue=1,TARA_N000002109
TARA_N000002107	TARA_147	SEQ-(500mL-or-15min)_N20-180	TARA_147_SRF_20-180	Westerlies Biome	[NAO] North Atlantic Ocean	[NAST-W] North Atlantic Subtropical Gyral Province (MRGID:21455)	[SRF] surface water layer (ENVO:00010504)	2012-02-18T19:54	32,9997	-66,5655	5,51	2012-02-18	15:13	20,12	36,57	213,26	-0,96	0,12	0,00	174,82	NA	0,40	1076	0,03	https://ws.pangaea.de/dds-fdp/rest/panquery?datasetDOI=doi.pangaea.de/10.1594/PANGAEA.853810&filterParameterValue=1,TARA_N000002107	https://ws.pangaea.de/dds-fdp/rest/panquery?datasetDOI=doi.pangaea.de/10.1594/PANGAEA.858201&filterParameterValue=1,TARA_N000002107	https://ws.pangaea.de/dds-fdp/rest/panquery?datasetDOI=doi.pangaea.de/10.1594/PANGAEA.858207&filterParameterValue=1,TARA_N000002107	https://ws.pangaea.de/dds-fdp/rest/panquery?datasetDOI=doi.pangaea.de/10.1594/PANGAEA.842197&filterParameterValue=1,TARA_N000002107
TARA_N000002105	TARA_147	SEQ-(500mL-or-15min)_N5-20	TARA_147_SRF_5-20	Westerlies Biome	[NAO] North Atlantic Ocean	[NAST-W] North Atlantic Subtropical Gyral Province (MRGID:21455)	[SRF] surface water layer (ENVO:00010504)	2012-02-18T21:23	32,9701	-66,5548	5,51	2012-02-18	16:42	20,12	36,57	213,26	-0,96	0,12	0,00	174,82	NA	0,40	1076	0,03	https://ws.pangaea.de/dds-fdp/rest/panquery?datasetDOI=doi.pangaea.de/10.1594/PANGAEA.853810&filterParameterValue=1,TARA_N000002105	https://ws.pangaea.de/dds-fdp/rest/panquery?datasetDOI=doi.pangaea.de/10.1594/PANGAEA.858201&filterParameterValue=1,TARA_N000002105	https://ws.pangaea.de/dds-fdp/rest/panquery?datasetDOI=doi.pangaea.de/10.1594/PANGAEA.858207&filterParameterValue=1,TARA_N000002105	https://ws.pangaea.de/dds-fdp/rest/panquery?datasetDOI=doi.pangaea.de/10.1594/PANGAEA.842197&filterParameterValue=1,TARA_N000002105
TARA_N000002106	TARA_147	SEQ-(500mL-or-15min)_N5-20	TARA_147_SRF_5-20	Westerlies Biome	[NAO] North Atlantic Ocean	[NAST-W] North Atlantic Subtropical Gyral Province (MRGID:21455)	[SRF] surface water layer (ENVO:00010504)	2012-02-18T21:23	32,9701	-66,5548	5,51	2012-02-18	16:42	20,12	36,57	213,26	-0,96	0,12	0,00	174,82	NA	0,40	1076	0,03	https://ws.pangaea.de/dds-fdp/rest/panquery?datasetDOI=doi.pangaea.de/10.1594/PANGAEA.853810&filterParameterValue=1,TARA_N000002106	https://ws.pangaea.de/dds-fdp/rest/panquery?datasetDOI=doi.pangaea.de/10.1594/PANGAEA.858201&filterParameterValue=1,TARA_N000002106	https://ws.pangaea.de/dds-fdp/rest/panquery?datasetDOI=doi.pangaea.de/10.1594/PANGAEA.858207&filterParameterValue=1,TARA_N000002106	https://ws.pangaea.de/dds-fdp/rest/panquery?datasetDOI=doi.pangaea.de/10.1594/PANGAEA.842197&filterParameterValue=1,TARA_N000002106
TARA_N000002111	TARA_148	SEQ-(100L-or-15min)_W>0.8	TARA_148_SRF_0.8-2000	Westerlies Biome	[NAO] North Atlantic Ocean	[NAST-W] North Atlantic Subtropical Gyral Province (MRGID:21455)	[SRF] surface water layer (ENVO:00010504)	2012-02-24T11:40	31,6948	-64,2489	6,05	2012-02-25	07:09	20,40	36,60	212,56	NA	0,17	0,00	77,52	382,04	0,15	1041	0,01	https://ws.pangaea.de/dds-fdp/rest/panquery?datasetDOI=doi.pangaea.de/10.1594/PANGAEA.853810&filterParameterValue=1,TARA_N000002111	https://ws.pangaea.de/dds-fdp/rest/panquery?datasetDOI=doi.pangaea.de/10.1594/PANGAEA.858201&filterParameterValue=1,TARA_N000002111	https://ws.pangaea.de/dds-fdp/rest/panquery?datasetDOI=doi.pangaea.de/10.1594/PANGAEA.858207&filterParameterValue=1,TARA_N000002111	https://ws.pangaea.de/dds-fdp/rest/panquery?datasetDOI=doi.pangaea.de/10.1594/PANGAEA.842197&filterParameterValue=1,TARA_N000002111
TARA_N000002119	TARA_148	SEQ-(500mL-or-15min)_N180-2000	TARA_148_SRF_180-2000	Westerlies Biome	[NAO] North Atlantic Ocean	[NAST-W] North Atlantic Subtropical Gyral Province (MRGID:21455)	[SRF] surface water layer (ENVO:00010504)	2012-02-24T13:51	31,7432	-64,1967	6,05	2012-02-25	09:20	20,40	36,60	212,56	NA	0,17	0,00	77,52	382,04	0,15	1041	0,01	https://ws.pangaea.de/dds-fdp/rest/panquery?datasetDOI=doi.pangaea.de/10.1594/PANGAEA.853810&filterParameterValue=1,TARA_N000002119	https://ws.pangaea.de/dds-fdp/rest/panquery?datasetDOI=doi.pangaea.de/10.1594/PANGAEA.858201&filterParameterValue=1,TARA_N000002119	https://ws.pangaea.de/dds-fdp/rest/panquery?datasetDOI=doi.pangaea.de/10.1594/PANGAEA.858207&filterParameterValue=1,TARA_N000002119	https://ws.pangaea.de/dds-fdp/rest/panquery?datasetDOI=doi.pangaea.de/10.1594/PANGAEA.842197&filterParameterValue=1,TARA_N000002119
TARA_N000002117	TARA_148	SEQ-(500mL-or-15min)_N20-180	TARA_148_SRF_20-180	Westerlies Biome	[NAO] North Atlantic Ocean	[NAST-W] North Atlantic Subtropical Gyral Province (MRGID:21455)	[SRF] surface water layer (ENVO:00010504)	2012-02-24T15:14	31,7913	-64,1522	6,05	2012-02-25	10:44	20,40	36,60	212,56	NA	0,17	0,00	77,52	382,04	0,15	1041	0,01	https://ws.pangaea.de/dds-fdp/rest/panquery?datasetDOI=doi.pangaea.de/10.1594/PANGAEA.853810&filterParameterValue=1,TARA_N000002117	https://ws.pangaea.de/dds-fdp/rest/panquery?datasetDOI=doi.pangaea.de/10.1594/PANGAEA.858201&filterParameterValue=1,TARA_N000002117	https://ws.pangaea.de/dds-fdp/rest/panquery?datasetDOI=doi.pangaea.de/10.1594/PANGAEA.858207&filterParameterValue=1,TARA_N000002117	https://ws.pangaea.de/dds-fdp/rest/panquery?datasetDOI=doi.pangaea.de/10.1594/PANGAEA.842197&filterParameterValue=1,TARA_N000002117
TARA_N000002115	TARA_148	SEQ-(500mL-or-15min)_N5-20	TARA_148_SRF_5-20	Westerlies Biome	[NAO] North Atlantic Ocean	[NAST-W] North Atlantic Subtropical Gyral Province (MRGID:21455)	[SRF] surface water layer (ENVO:00010504)	2012-02-24T15:43	31,8103	-64,1348	6,05	2012-02-25	11:13	20,40	36,60	212,56	NA	0,17	0,00	77,52	382,04	0,15	1041	0,01	https://ws.pangaea.de/dds-fdp/rest/panquery?datasetDOI=doi.pangaea.de/10.1594/PANGAEA.853810&filterParameterValue=1,TARA_N000002115	https://ws.pangaea.de/dds-fdp/rest/panquery?datasetDOI=doi.pangaea.de/10.1594/PANGAEA.858201&filterParameterValue=1,TARA_N000002115	https://ws.pangaea.de/dds-fdp/rest/panquery?datasetDOI=doi.pangaea.de/10.1594/PANGAEA.858207&filterParameterValue=1,TARA_N000002115	https://ws.pangaea.de/dds-fdp/rest/panquery?datasetDOI=doi.pangaea.de/10.1594/PANGAEA.842197&filterParameterValue=1,TARA_N000002115
TARA_N000002141	TARA_149	SEQ-(500mL-or-15min)_N180-2000	TARA_149_SRF_180-2000	Westerlies Biome	[NAO] North Atlantic Ocean	[NAST-W] North Atlantic Subtropical Gyral Province (MRGID:21455)	[SRF] surface water layer (ENVO:00010504)	2012-03-01T13:01	34,0823	-49,8695	5,53	2012-03-02	09:29	18,73	36,41	220,19	-1,18	0,21	0,06	1391,23	601,62	0,68	1004	0,06	https://ws.pangaea.de/dds-fdp/rest/panquery?datasetDOI=doi.pangaea.de/10.1594/PANGAEA.853810&filterParameterValue=1,TARA_N000002141	https://ws.pangaea.de/dds-fdp/rest/panquery?datasetDOI=doi.pangaea.de/10.1594/PANGAEA.858201&filterParameterValue=1,TARA_N000002141	https://ws.pangaea.de/dds-fdp/rest/panquery?datasetDOI=doi.pangaea.de/10.1594/PANGAEA.858207&filterParameterValue=1,TARA_N000002141	https://ws.pangaea.de/dds-fdp/rest/panquery?datasetDOI=doi.pangaea.de/10.1594/PANGAEA.842197&filterParameterValue=1,TARA_N000002141
TARA_N000002139	TARA_149	SEQ-(500mL-or-15min)_N20-180	TARA_149_SRF_20-180	Westerlies Biome	[NAO] North Atlantic Ocean	[NAST-W] North Atlantic Subtropical Gyral Province (MRGID:21455)	[SRF] surface water layer (ENVO:00010504)	2012-03-01T14:22	34,0639	-49844	5,53	2012-03-02	10:50	18,73	36,41	220,19	-1,18	0,21	0,06	1391,23	601,62	0,68	1004	0,06	https://ws.pangaea.de/dds-fdp/rest/panquery?datasetDOI=doi.pangaea.de/10.1594/PANGAEA.853810&filterParameterValue=1,TARA_N000002139	https://ws.pangaea.de/dds-fdp/rest/panquery?datasetDOI=doi.pangaea.de/10.1594/PANGAEA.858201&filterParameterValue=1,TARA_N000002139	https://ws.pangaea.de/dds-fdp/rest/panquery?datasetDOI=doi.pangaea.de/10.1594/PANGAEA.858207&filterParameterValue=1,TARA_N000002139	https://ws.pangaea.de/dds-fdp/rest/panquery?datasetDOI=doi.pangaea.de/10.1594/PANGAEA.842197&filterParameterValue=1,TARA_N000002139
TARA_N000002137	TARA_149	SEQ-(500mL-or-15min)_N5-20	TARA_149_SRF_5-20	Westerlies Biome	[NAO] North Atlantic Ocean	[NAST-W] North Atlantic Subtropical Gyral Province (MRGID:21455)	[SRF] surface water layer (ENVO:00010504)	2012-03-01T14:59	34,0533	-49,8355	5,53	2012-03-02	11:27	18,73	36,41	220,19	-1,18	0,21	0,06	1391,23	601,62	0,68	1004	0,06	https://ws.pangaea.de/dds-fdp/rest/panquery?datasetDOI=doi.pangaea.de/10.1594/PANGAEA.853810&filterParameterValue=1,TARA_N000002137	https://ws.pangaea.de/dds-fdp/rest/panquery?datasetDOI=doi.pangaea.de/10.1594/PANGAEA.858201&filterParameterValue=1,TARA_N000002137	https://ws.pangaea.de/dds-fdp/rest/panquery?datasetDOI=doi.pangaea.de/10.1594/PANGAEA.858207&filterParameterValue=1,TARA_N000002137	https://ws.pangaea.de/dds-fdp/rest/panquery?datasetDOI=doi.pangaea.de/10.1594/PANGAEA.842197&filterParameterValue=1,TARA_N000002137
TARA_N000002145	TARA_150	SEQ-(100L-or-15min)_W0.8-5	TARA_150_DCM_0.8-5	Westerlies Biome	[NAO] North Atlantic Ocean	[NAST-W] North Atlantic Subtropical Gyral Province (MRGID:21455)	[DCM] deep chlorophyll maximum layer (ENVO:01000326)	2012-03-05T17:34	35,8427	-37,1526	41,31	2012-03-05	14:54	17,66	36,24	230,11	1,21	0,34	0,00	653,70	627,01	0,17	1070	0,04	https://ws.pangaea.de/dds-fdp/rest/panquery?datasetDOI=doi.pangaea.de/10.1594/PANGAEA.853810&filterParameterValue=1,TARA_N000002145	https://ws.pangaea.de/dds-fdp/rest/panquery?datasetDOI=doi.pangaea.de/10.1594/PANGAEA.858201&filterParameterValue=1,TARA_N000002145	https://ws.pangaea.de/dds-fdp/rest/panquery?datasetDOI=doi.pangaea.de/10.1594/PANGAEA.858207&filterParameterValue=1,TARA_N000002145	https://ws.pangaea.de/dds-fdp/rest/panquery?datasetDOI=doi.pangaea.de/10.1594/PANGAEA.842197&filterParameterValue=1,TARA_N000002145
TARA_N000002719	TARA_150	SEQ-(500mL-or-15min)_N180-2000	TARA_150_DCM_180-2000	Westerlies Biome	[NAO] North Atlantic Ocean	[NAST-W] North Atlantic Subtropical Gyral Province (MRGID:21455)	[DCM] deep chlorophyll maximum layer (ENVO:01000326)	2012-03-05T19:57	35,7867	-37,0916	41,31	2012-03-05	17:17	17,66	36,24	230,11	1,21	0,34	0,00	653,70	627,01	0,17	1070	0,04	https://ws.pangaea.de/dds-fdp/rest/panquery?datasetDOI=doi.pangaea.de/10.1594/PANGAEA.853810&filterParameterValue=1,TARA_N000002719	https://ws.pangaea.de/dds-fdp/rest/panquery?datasetDOI=doi.pangaea.de/10.1594/PANGAEA.858201&filterParameterValue=1,TARA_N000002719	https://ws.pangaea.de/dds-fdp/rest/panquery?datasetDOI=doi.pangaea.de/10.1594/PANGAEA.858207&filterParameterValue=1,TARA_N000002719	https://ws.pangaea.de/dds-fdp/rest/panquery?datasetDOI=doi.pangaea.de/10.1594/PANGAEA.842197&filterParameterValue=1,TARA_N000002719
TARA_N000002717	TARA_150	SEQ-(500mL-or-15min)_N20-180	TARA_150_DCM_20-180	Westerlies Biome	[NAO] North Atlantic Ocean	[NAST-W] North Atlantic Subtropical Gyral Province (MRGID:21455)	[DCM] deep chlorophyll maximum layer (ENVO:01000326)	2012-03-05T16:47	35,8605	-37178	41,31	2012-03-05	14:06	17,66	36,24	230,11	1,21	0,34	0,00	653,70	627,01	0,17	1070	0,04	https://ws.pangaea.de/dds-fdp/rest/panquery?datasetDOI=doi.pangaea.de/10.1594/PANGAEA.853810&filterParameterValue=1,TARA_N000002717	https://ws.pangaea.de/dds-fdp/rest/panquery?datasetDOI=doi.pangaea.de/10.1594/PANGAEA.858201&filterParameterValue=1,TARA_N000002717	https://ws.pangaea.de/dds-fdp/rest/panquery?datasetDOI=doi.pangaea.de/10.1594/PANGAEA.858207&filterParameterValue=1,TARA_N000002717	https://ws.pangaea.de/dds-fdp/rest/panquery?datasetDOI=doi.pangaea.de/10.1594/PANGAEA.842197&filterParameterValue=1,TARA_N000002717
TARA_N000002147	TARA_150	SEQ-(500mL-or-15min)_N5-20	TARA_150_DCM_5-20	Westerlies Biome	[NAO] North Atlantic Ocean	[NAST-W] North Atlantic Subtropical Gyral Province (MRGID:21455)	[DCM] deep chlorophyll maximum layer (ENVO:01000326)	2012-03-05T16:10	35,8777	-37,1969	41,31	2012-03-05	13:29	17,66	36,24	230,11	1,21	0,34	0,00	653,70	627,01	0,17	1070	0,04	https://ws.pangaea.de/dds-fdp/rest/panquery?datasetDOI=doi.pangaea.de/10.1594/PANGAEA.853810&filterParameterValue=1,TARA_N000002147	https://ws.pangaea.de/dds-fdp/rest/panquery?datasetDOI=doi.pangaea.de/10.1594/PANGAEA.858201&filterParameterValue=1,TARA_N000002147	https://ws.pangaea.de/dds-fdp/rest/panquery?datasetDOI=doi.pangaea.de/10.1594/PANGAEA.858207&filterParameterValue=1,TARA_N000002147	https://ws.pangaea.de/dds-fdp/rest/panquery?datasetDOI=doi.pangaea.de/10.1594/PANGAEA.842197&filterParameterValue=1,TARA_N000002147
TARA_N000002695	TARA_150	SEQ-(100L-or-15min)_W>0.8	TARA_150_SRF_0.8-2000	Westerlies Biome	[NAO] North Atlantic Ocean	[NAST-W] North Atlantic Subtropical Gyral Province (MRGID:21455)	[SRF] surface water layer (ENVO:00010504)	2012-03-05T09:25	35,9346	-37,3032	5,53	2012-03-06	06:44	17,58	36,31	228,38	-0,33	0,20	0,01	653,70	573,70	0,17	1101	0,02	https://ws.pangaea.de/dds-fdp/rest/panquery?datasetDOI=doi.pangaea.de/10.1594/PANGAEA.853810&filterParameterValue=1,TARA_N000002695	https://ws.pangaea.de/dds-fdp/rest/panquery?datasetDOI=doi.pangaea.de/10.1594/PANGAEA.858201&filterParameterValue=1,TARA_N000002695	https://ws.pangaea.de/dds-fdp/rest/panquery?datasetDOI=doi.pangaea.de/10.1594/PANGAEA.858207&filterParameterValue=1,TARA_N000002695	https://ws.pangaea.de/dds-fdp/rest/panquery?datasetDOI=doi.pangaea.de/10.1594/PANGAEA.842197&filterParameterValue=1,TARA_N000002695
TARA_N000002697	TARA_150	SEQ-(100L-or-15min)_W0.8-5	TARA_150_SRF_0.8-5	Westerlies Biome	[NAO] North Atlantic Ocean	[NAST-W] North Atlantic Subtropical Gyral Province (MRGID:21455)	[SRF] surface water layer (ENVO:00010504)	2012-03-05T09:25	35,9346	-37,3032	5,53	2012-03-06	06:44	17,58	36,31	228,38	-0,33	0,20	0,01	653,70	573,70	0,17	1101	0,02	https://ws.pangaea.de/dds-fdp/rest/panquery?datasetDOI=doi.pangaea.de/10.1594/PANGAEA.853810&filterParameterValue=1,TARA_N000002697	https://ws.pangaea.de/dds-fdp/rest/panquery?datasetDOI=doi.pangaea.de/10.1594/PANGAEA.858201&filterParameterValue=1,TARA_N000002697	https://ws.pangaea.de/dds-fdp/rest/panquery?datasetDOI=doi.pangaea.de/10.1594/PANGAEA.858207&filterParameterValue=1,TARA_N000002697	https://ws.pangaea.de/dds-fdp/rest/panquery?datasetDOI=doi.pangaea.de/10.1594/PANGAEA.842197&filterParameterValue=1,TARA_N000002697
TARA_N000002703	TARA_150	SEQ-(500mL-or-15min)_N180-2000	TARA_150_SRF_180-2000	Westerlies Biome	[NAO] North Atlantic Ocean	[NAST-W] North Atlantic Subtropical Gyral Province (MRGID:21455)	[SRF] surface water layer (ENVO:00010504)	2012-03-05T10:33	35,9167	-37,2761	5,53	2012-03-06	07:52	17,58	36,31	228,38	-0,33	0,20	0,01	653,70	573,70	0,17	1101	0,02	https://ws.pangaea.de/dds-fdp/rest/panquery?datasetDOI=doi.pangaea.de/10.1594/PANGAEA.853810&filterParameterValue=1,TARA_N000002703	https://ws.pangaea.de/dds-fdp/rest/panquery?datasetDOI=doi.pangaea.de/10.1594/PANGAEA.858201&filterParameterValue=1,TARA_N000002703	https://ws.pangaea.de/dds-fdp/rest/panquery?datasetDOI=doi.pangaea.de/10.1594/PANGAEA.858207&filterParameterValue=1,TARA_N000002703	https://ws.pangaea.de/dds-fdp/rest/panquery?datasetDOI=doi.pangaea.de/10.1594/PANGAEA.842197&filterParameterValue=1,TARA_N000002703
TARA_N000002701	TARA_150	SEQ-(500mL-or-15min)_N20-180	TARA_150_SRF_20-180	Westerlies Biome	[NAO] North Atlantic Ocean	[NAST-W] North Atlantic Subtropical Gyral Province (MRGID:21455)	[SRF] surface water layer (ENVO:00010504)	2012-03-05T12:07	35,8913	-37,2369	5,53	2012-03-06	09:26	17,58	36,31	228,38	-0,33	0,20	0,01	653,70	573,70	0,17	1101	0,02	https://ws.pangaea.de/dds-fdp/rest/panquery?datasetDOI=doi.pangaea.de/10.1594/PANGAEA.853810&filterParameterValue=1,TARA_N000002701	https://ws.pangaea.de/dds-fdp/rest/panquery?datasetDOI=doi.pangaea.de/10.1594/PANGAEA.858201&filterParameterValue=1,TARA_N000002701	https://ws.pangaea.de/dds-fdp/rest/panquery?datasetDOI=doi.pangaea.de/10.1594/PANGAEA.858207&filterParameterValue=1,TARA_N000002701	https://ws.pangaea.de/dds-fdp/rest/panquery?datasetDOI=doi.pangaea.de/10.1594/PANGAEA.842197&filterParameterValue=1,TARA_N000002701
TARA_N000002699	TARA_150	SEQ-(500mL-or-15min)_N5-20	TARA_150_SRF_5-20	Westerlies Biome	[NAO] North Atlantic Ocean	[NAST-W] North Atlantic Subtropical Gyral Province (MRGID:21455)	[SRF] surface water layer (ENVO:00010504)	2012-03-05T13:45	35,8641	-37,1831	5,53	2012-03-06	11:04	17,58	36,31	228,38	-0,33	0,20	0,01	653,70	573,70	0,17	1101	0,02	https://ws.pangaea.de/dds-fdp/rest/panquery?datasetDOI=doi.pangaea.de/10.1594/PANGAEA.853810&filterParameterValue=1,TARA_N000002699	https://ws.pangaea.de/dds-fdp/rest/panquery?datasetDOI=doi.pangaea.de/10.1594/PANGAEA.858201&filterParameterValue=1,TARA_N000002699	https://ws.pangaea.de/dds-fdp/rest/panquery?datasetDOI=doi.pangaea.de/10.1594/PANGAEA.858207&filterParameterValue=1,TARA_N000002699	https://ws.pangaea.de/dds-fdp/rest/panquery?datasetDOI=doi.pangaea.de/10.1594/PANGAEA.842197&filterParameterValue=1,TARA_N000002699
TARA_N000002739	TARA_151	SEQ-(100L-or-15min)_W>0.8	TARA_151_DCM_0.8-2000	Westerlies Biome	[NAO] North Atlantic Ocean	[NAST-E] North Atlantic Subtropical Gyral Province (MRGID:21467)	[DCM] deep chlorophyll maximum layer (ENVO:01000326)	2012-03-09T17:42:29	36,1811	-28,9373	76,51	2012-03-09	15:35	16,91	36,21	230,65	0,46	0,28	0,01	251,93	466,32	0,05	1278	0,15	https://ws.pangaea.de/dds-fdp/rest/panquery?datasetDOI=doi.pangaea.de/10.1594/PANGAEA.853810&filterParameterValue=1,TARA_N000002739	https://ws.pangaea.de/dds-fdp/rest/panquery?datasetDOI=doi.pangaea.de/10.1594/PANGAEA.858201&filterParameterValue=1,TARA_N000002739	https://ws.pangaea.de/dds-fdp/rest/panquery?datasetDOI=doi.pangaea.de/10.1594/PANGAEA.858207&filterParameterValue=1,TARA_N000002739	https://ws.pangaea.de/dds-fdp/rest/panquery?datasetDOI=doi.pangaea.de/10.1594/PANGAEA.842197&filterParameterValue=1,TARA_N000002739
TARA_N000002751	TARA_151	SEQ-(500mL-or-15min)_N180-2000	TARA_151_DCM_180-2000	Westerlies Biome	[NAO] North Atlantic Ocean	[NAST-E] North Atlantic Subtropical Gyral Province (MRGID:21467)	[DCM] deep chlorophyll maximum layer (ENVO:01000326)	2012-03-09T17:05	36,1765	-28,9694	76,51	2012-03-09	14:58	16,91	36,21	230,65	0,46	0,28	0,01	251,93	466,32	0,05	1278	0,15	https://ws.pangaea.de/dds-fdp/rest/panquery?datasetDOI=doi.pangaea.de/10.1594/PANGAEA.853810&filterParameterValue=1,TARA_N000002751	https://ws.pangaea.de/dds-fdp/rest/panquery?datasetDOI=doi.pangaea.de/10.1594/PANGAEA.858201&filterParameterValue=1,TARA_N000002751	https://ws.pangaea.de/dds-fdp/rest/panquery?datasetDOI=doi.pangaea.de/10.1594/PANGAEA.858207&filterParameterValue=1,TARA_N000002751	https://ws.pangaea.de/dds-fdp/rest/panquery?datasetDOI=doi.pangaea.de/10.1594/PANGAEA.842197&filterParameterValue=1,TARA_N000002751
TARA_N000002755	TARA_151	SEQ-(500mL-or-15min)_N20-180	TARA_151_DCM_20-180	Westerlies Biome	[NAO] North Atlantic Ocean	[NAST-E] North Atlantic Subtropical Gyral Province (MRGID:21467)	[DCM] deep chlorophyll maximum layer (ENVO:01000326)	2012-03-09T16:17	36,1736	-29003	76,51	2012-03-09	14:10	16,91	36,21	230,65	0,46	0,28	0,01	251,93	466,32	0,05	1278	0,15	https://ws.pangaea.de/dds-fdp/rest/panquery?datasetDOI=doi.pangaea.de/10.1594/PANGAEA.853810&filterParameterValue=1,TARA_N000002755	https://ws.pangaea.de/dds-fdp/rest/panquery?datasetDOI=doi.pangaea.de/10.1594/PANGAEA.858201&filterParameterValue=1,TARA_N000002755	https://ws.pangaea.de/dds-fdp/rest/panquery?datasetDOI=doi.pangaea.de/10.1594/PANGAEA.858207&filterParameterValue=1,TARA_N000002755	https://ws.pangaea.de/dds-fdp/rest/panquery?datasetDOI=doi.pangaea.de/10.1594/PANGAEA.842197&filterParameterValue=1,TARA_N000002755
TARA_N000002737	TARA_151	SEQ-(100L-or-15min)_W>0.8	TARA_151_SRF_0.8-2000	Westerlies Biome	[NAO] North Atlantic Ocean	[NAST-E] North Atlantic Subtropical Gyral Province (MRGID:21467)	[SRF] surface water layer (ENVO:00010504)	2012-03-09T08:59	36,1715	-29023	5,40	2012-03-10	06:52	17,26	36,24	232,05	0,33	0,04	0,01	251,93	444,09	0,02	1339	0,05	https://ws.pangaea.de/dds-fdp/rest/panquery?datasetDOI=doi.pangaea.de/10.1594/PANGAEA.853810&filterParameterValue=1,TARA_N000002737	https://ws.pangaea.de/dds-fdp/rest/panquery?datasetDOI=doi.pangaea.de/10.1594/PANGAEA.858201&filterParameterValue=1,TARA_N000002737	https://ws.pangaea.de/dds-fdp/rest/panquery?datasetDOI=doi.pangaea.de/10.1594/PANGAEA.858207&filterParameterValue=1,TARA_N000002737	https://ws.pangaea.de/dds-fdp/rest/panquery?datasetDOI=doi.pangaea.de/10.1594/PANGAEA.842197&filterParameterValue=1,TARA_N000002737
TARA_N000002741	TARA_151	SEQ-(100L-or-15min)_W0.8-5	TARA_151_SRF_0.8-5	Westerlies Biome	[NAO] North Atlantic Ocean	[NAST-E] North Atlantic Subtropical Gyral Province (MRGID:21467)	[SRF] surface water layer (ENVO:00010504)	2012-03-09T08:59	36,1715	-29023	5,40	2012-03-10	06:52	17,26	36,24	232,05	0,33	0,04	0,01	251,93	444,09	0,02	1339	0,05	https://ws.pangaea.de/dds-fdp/rest/panquery?datasetDOI=doi.pangaea.de/10.1594/PANGAEA.853810&filterParameterValue=1,TARA_N000002741	https://ws.pangaea.de/dds-fdp/rest/panquery?datasetDOI=doi.pangaea.de/10.1594/PANGAEA.858201&filterParameterValue=1,TARA_N000002741	https://ws.pangaea.de/dds-fdp/rest/panquery?datasetDOI=doi.pangaea.de/10.1594/PANGAEA.858207&filterParameterValue=1,TARA_N000002741	https://ws.pangaea.de/dds-fdp/rest/panquery?datasetDOI=doi.pangaea.de/10.1594/PANGAEA.842197&filterParameterValue=1,TARA_N000002741
TARA_N000002753	TARA_151	SEQ-(500mL-or-15min)_N180-2000	TARA_151_SRF_180-2000	Westerlies Biome	[NAO] North Atlantic Ocean	[NAST-E] North Atlantic Subtropical Gyral Province (MRGID:21467)	[SRF] surface water layer (ENVO:00010504)	2012-03-09T09:49	36,1631	-29,0143	5,40	2012-03-10	07:42	17,26	36,24	232,05	0,33	0,04	0,01	251,93	444,09	0,02	1339	0,05	https://ws.pangaea.de/dds-fdp/rest/panquery?datasetDOI=doi.pangaea.de/10.1594/PANGAEA.853810&filterParameterValue=1,TARA_N000002753	https://ws.pangaea.de/dds-fdp/rest/panquery?datasetDOI=doi.pangaea.de/10.1594/PANGAEA.858201&filterParameterValue=1,TARA_N000002753	https://ws.pangaea.de/dds-fdp/rest/panquery?datasetDOI=doi.pangaea.de/10.1594/PANGAEA.858207&filterParameterValue=1,TARA_N000002753	https://ws.pangaea.de/dds-fdp/rest/panquery?datasetDOI=doi.pangaea.de/10.1594/PANGAEA.842197&filterParameterValue=1,TARA_N000002753
TARA_N000002749	TARA_151	SEQ-(500mL-or-15min)_N20-180	TARA_151_SRF_20-180	Westerlies Biome	[NAO] North Atlantic Ocean	[NAST-E] North Atlantic Subtropical Gyral Province (MRGID:21467)	[SRF] surface water layer (ENVO:00010504)	2012-03-09T11:11	36,15	-28,9989	5,40	2012-03-10	09:04	17,26	36,24	232,05	0,33	0,04	0,01	251,93	444,09	0,02	1339	0,05	https://ws.pangaea.de/dds-fdp/rest/panquery?datasetDOI=doi.pangaea.de/10.1594/PANGAEA.853810&filterParameterValue=1,TARA_N000002749	https://ws.pangaea.de/dds-fdp/rest/panquery?datasetDOI=doi.pangaea.de/10.1594/PANGAEA.858201&filterParameterValue=1,TARA_N000002749	https://ws.pangaea.de/dds-fdp/rest/panquery?datasetDOI=doi.pangaea.de/10.1594/PANGAEA.858207&filterParameterValue=1,TARA_N000002749	https://ws.pangaea.de/dds-fdp/rest/panquery?datasetDOI=doi.pangaea.de/10.1594/PANGAEA.842197&filterParameterValue=1,TARA_N000002749
TARA_N000002745	TARA_151	SEQ-(500mL-or-15min)_N5-20	TARA_151_SRF_5-20	Westerlies Biome	[NAO] North Atlantic Ocean	[NAST-E] North Atlantic Subtropical Gyral Province (MRGID:21467)	[SRF] surface water layer (ENVO:00010504)	2012-03-09T12:42	36,1399	-28,9689	5,40	2012-03-10	10:35	17,26	36,24	232,05	0,33	0,04	0,01	251,93	444,09	0,02	1339	0,05	https://ws.pangaea.de/dds-fdp/rest/panquery?datasetDOI=doi.pangaea.de/10.1594/PANGAEA.853810&filterParameterValue=1,TARA_N000002745	https://ws.pangaea.de/dds-fdp/rest/panquery?datasetDOI=doi.pangaea.de/10.1594/PANGAEA.858201&filterParameterValue=1,TARA_N000002745	https://ws.pangaea.de/dds-fdp/rest/panquery?datasetDOI=doi.pangaea.de/10.1594/PANGAEA.858207&filterParameterValue=1,TARA_N000002745	https://ws.pangaea.de/dds-fdp/rest/panquery?datasetDOI=doi.pangaea.de/10.1594/PANGAEA.842197&filterParameterValue=1,TARA_N000002745
TARA_N000002773	TARA_152	SEQ-(100L-or-15min)_W>0.8	TARA_152_SRF_0.8-2000	Westerlies Biome	[NAO] North Atlantic Ocean	[NAST-E] North Atlantic Subtropical Gyral Province (MRGID:21467)	[SRF] surface water layer (ENVO:00010504)	2012-03-19T08:18	43,6792	-16,8344	6,02	2012-03-20	07:02	14,26	35,98	242,76	1,45	0,33	0,16	618,23	423,27	2,16	987	0,35	https://ws.pangaea.de/dds-fdp/rest/panquery?datasetDOI=doi.pangaea.de/10.1594/PANGAEA.853810&filterParameterValue=1,TARA_N000002773	https://ws.pangaea.de/dds-fdp/rest/panquery?datasetDOI=doi.pangaea.de/10.1594/PANGAEA.858201&filterParameterValue=1,TARA_N000002773	https://ws.pangaea.de/dds-fdp/rest/panquery?datasetDOI=doi.pangaea.de/10.1594/PANGAEA.858207&filterParameterValue=1,TARA_N000002773	https://ws.pangaea.de/dds-fdp/rest/panquery?datasetDOI=doi.pangaea.de/10.1594/PANGAEA.842197&filterParameterValue=1,TARA_N000002773
TARA_N000002789	TARA_152	SEQ-(100L-or-15min)_W0.8-5	TARA_152_SRF_0.8-5	Westerlies Biome	[NAO] North Atlantic Ocean	[NAST-E] North Atlantic Subtropical Gyral Province (MRGID:21467)	[SRF] surface water layer (ENVO:00010504)	2012-03-19T08:18	43,6792	-16,8344	6,02	2012-03-20	07:02	14,26	35,98	242,76	1,45	0,33	0,16	618,23	423,27	2,16	987	0,35	https://ws.pangaea.de/dds-fdp/rest/panquery?datasetDOI=doi.pangaea.de/10.1594/PANGAEA.853810&filterParameterValue=1,TARA_N000002789	https://ws.pangaea.de/dds-fdp/rest/panquery?datasetDOI=doi.pangaea.de/10.1594/PANGAEA.858201&filterParameterValue=1,TARA_N000002789	https://ws.pangaea.de/dds-fdp/rest/panquery?datasetDOI=doi.pangaea.de/10.1594/PANGAEA.858207&filterParameterValue=1,TARA_N000002789	https://ws.pangaea.de/dds-fdp/rest/panquery?datasetDOI=doi.pangaea.de/10.1594/PANGAEA.842197&filterParameterValue=1,TARA_N000002789
TARA_N000002777	TARA_152	SEQ-(500mL-or-15min)_N180-2000	TARA_152_SRF_180-2000	Westerlies Biome	[NAO] North Atlantic Ocean	[NAST-E] North Atlantic Subtropical Gyral Province (MRGID:21467)	[SRF] surface water layer (ENVO:00010504)	2012-03-19T09:09	43,6825	-16,8412	6,02	2012-03-20	07:53	14,26	35,98	242,76	1,45	0,33	0,16	618,23	423,27	2,16	987	0,35	https://ws.pangaea.de/dds-fdp/rest/panquery?datasetDOI=doi.pangaea.de/10.1594/PANGAEA.853810&filterParameterValue=1,TARA_N000002777	https://ws.pangaea.de/dds-fdp/rest/panquery?datasetDOI=doi.pangaea.de/10.1594/PANGAEA.858201&filterParameterValue=1,TARA_N000002777	https://ws.pangaea.de/dds-fdp/rest/panquery?datasetDOI=doi.pangaea.de/10.1594/PANGAEA.858207&filterParameterValue=1,TARA_N000002777	https://ws.pangaea.de/dds-fdp/rest/panquery?datasetDOI=doi.pangaea.de/10.1594/PANGAEA.842197&filterParameterValue=1,TARA_N000002777
TARA_N000002781	TARA_152	SEQ-(500mL-or-15min)_N20-180	TARA_152_SRF_20-180	Westerlies Biome	[NAO] North Atlantic Ocean	[NAST-E] North Atlantic Subtropical Gyral Province (MRGID:21467)	[SRF] surface water layer (ENVO:00010504)	2012-03-19T11:20	43,6904	-16,8544	6,02	2012-03-20	10:04	14,26	35,98	242,76	1,45	0,33	0,16	618,23	423,27	2,16	987	0,35	https://ws.pangaea.de/dds-fdp/rest/panquery?datasetDOI=doi.pangaea.de/10.1594/PANGAEA.853810&filterParameterValue=1,TARA_N000002781	https://ws.pangaea.de/dds-fdp/rest/panquery?datasetDOI=doi.pangaea.de/10.1594/PANGAEA.858201&filterParameterValue=1,TARA_N000002781	https://ws.pangaea.de/dds-fdp/rest/panquery?datasetDOI=doi.pangaea.de/10.1594/PANGAEA.858207&filterParameterValue=1,TARA_N000002781	https://ws.pangaea.de/dds-fdp/rest/panquery?datasetDOI=doi.pangaea.de/10.1594/PANGAEA.842197&filterParameterValue=1,TARA_N000002781
TARA_N000002761	TARA_152	SEQ-(500mL-or-15min)_N5-20	TARA_152_SRF_5-20	Westerlies Biome	[NAO] North Atlantic Ocean	[NAST-E] North Atlantic Subtropical Gyral Province (MRGID:21467)	[SRF] surface water layer (ENVO:00010504)	2012-03-19T09:58	43,6858	-16,8474	6,02	2012-03-20	08:42	14,26	35,98	242,76	1,45	0,33	0,16	618,23	423,27	2,16	987	0,35	https://ws.pangaea.de/dds-fdp/rest/panquery?datasetDOI=doi.pangaea.de/10.1594/PANGAEA.853810&filterParameterValue=1,TARA_N000002761	https://ws.pangaea.de/dds-fdp/rest/panquery?datasetDOI=doi.pangaea.de/10.1594/PANGAEA.858201&filterParameterValue=1,TARA_N000002761	https://ws.pangaea.de/dds-fdp/rest/panquery?datasetDOI=doi.pangaea.de/10.1594/PANGAEA.858207&filterParameterValue=1,TARA_N000002761	https://ws.pangaea.de/dds-fdp/rest/panquery?datasetDOI=doi.pangaea.de/10.1594/PANGAEA.842197&filterParameterValue=1,TARA_N000002761
TARA_N000002785	TARA_152	SEQ-(500mL-or-15min)_N5-20	TARA_152_SRF_5-20	Westerlies Biome	[NAO] North Atlantic Ocean	[NAST-E] North Atlantic Subtropical Gyral Province (MRGID:21467)	[SRF] surface water layer (ENVO:00010504)	2012-03-19T09:58	43,6858	-16,8474	6,02	2012-03-20	08:42	14,26	35,98	242,76	1,45	0,33	0,16	618,23	423,27	2,16	987	0,35	https://ws.pangaea.de/dds-fdp/rest/panquery?datasetDOI=doi.pangaea.de/10.1594/PANGAEA.853810&filterParameterValue=1,TARA_N000002785	https://ws.pangaea.de/dds-fdp/rest/panquery?datasetDOI=doi.pangaea.de/10.1594/PANGAEA.858201&filterParameterValue=1,TARA_N000002785	https://ws.pangaea.de/dds-fdp/rest/panquery?datasetDOI=doi.pangaea.de/10.1594/PANGAEA.858207&filterParameterValue=1,TARA_N000002785	https://ws.pangaea.de/dds-fdp/rest/panquery?datasetDOI=doi.pangaea.de/10.1594/PANGAEA.842197&filterParameterValue=1,TARA_N000002785

## Sheet: MGT-v1_abundance_profile_matrix
MGT	TARA-7_DCM_0.8-5	TARA-7_DCM_5-20	TARA-7_DCM_20-180	TARA-7_SRF_0.8-5	TARA-7_SRF_20-180	TARA-23_DCM_0.8-5	TARA-23_DCM_20-180	TARA-23_DCM_180-2000	TARA-23_SRF_0.8-5	TARA-23_SRF_20-180	TARA-23_SRF_180-2000	TARA-30_DCM_20-180	TARA-30_SRF_5-20	TARA-30_SRF_20-180	TARA-30_SRF_180-2000	TARA-64_SRF_0.8-5	TARA-64_SRF_20-180	TARA-64_SRF_180-2000	TARA-64_DCM_20-180	TARA-64_DCM_180-2000	TARA-9_SRF_0.8-5	TARA-9_DCM_0.8-5	TARA-9_SRF_180-2000	TARA-11_SRF_0	TARA-11_SRF_20-180	TARA-11_SRF_180-2000	TARA-18_SRF_0.8-5	TARA-18_DCM_0.8-5	TARA-18_SRF_5-20	TARA-18_DCM_5-20	TARA-18_SRF_20-180	TARA-18_DCM_20-180	TARA-20_SRF_180-2000	TARA-22_SRF_0.8-5	TARA-22_DCM_0.8-5	TARA-22_SRF_5-20	TARA-22_DCM_5-20	TARA-22_SRF_20-180	TARA-22_DCM_20-180	TARA-22_DCM_180-2000	TARA-25_SRF_0.8-5	TARA-25_DCM_0.8-5	TARA-25_SRF_5-20	TARA-25_SRF_20-180	TARA-25_DCM_20-180	TARA-25_SRF_180-2000	TARA-25_DCM_180-2000	TARA-26_SRF_20-180	TARA-36_SRF_0.8-5
MGT-v1_1	0	0	0	0	0	0	0	0	0	0	0	0	0	0	0	0	0.0930233	0	0.0817844	0	0	0	0	0	0	0	0	0	0	0	0	0	0	0	0	0	0	0	0	0	0	0	0	0	0	0	0	0	0
MGT-v1_2	0	0.0123457	0.0144928	0	0.0178571	0	0	0.0168067	0	0	0.0108108	0	0	0	0	0	0.00985222	0	0	0.0157068	0	0	0.0134228	0	0.0218487	0.21371	0	0	0.0122699	0	0.00990099	0	0	0	0	0	0	0.01	0.00995025	0.00990099	0	0	0	0	0	0	0	0	0
MGT-v1_3	0	0	0	0	0	0	0	0	0	0	0	0	0	0	0	0	0	0	0	0	0	0	0	0	0	0	0	0	0	0	0	0	0	0	0	0	0	0	0	0	0	0	0	0	0	0	0	0	0
MGT-v1_4	0	0	0	0	0	0	0	0	0	0	0	0	0	0	0	0	0	0	0	0	0	0	0	0	0	0	0	0	0	0	0	0	0	0	0	0	0	0	0	0	0	0	0	0	0	0	0	0	0
MGT-v1_5	0	0.0182648	0.0755102	0	0.0521327	0	0.0149254	0	0	0.0615551	0.00990099	0	0	0.0103093	0	0	0	0	0	0	0	0	0	0	0.42915	0.0185185	0	0	0.0202429	0	0.0428571	0.0254011	0	0	0	0.00990099	0.00990099	0.0497667	0.0162162	0	0	0	0.0121581	0.0207101	0.0113636	0	0	0.056004	0
MGT-v1_6	0	0.0153846	0.0140845	0	0.01373	0	0	0.00925926	0	0	0.023948	0	0	0	0.0126354	0	0	0	0	0	0	0	0.0187354	0	0.0181269	0.370991	0	0	0	0.0164706	0	0	0	0	0	0.0119048	0.0116959	0	0	0.0120048	0	0	0	0	0	0	0	0	0
MGT-v1_7	0	0.026178	0.0614525	0	0.0294118	0	0	0	0	0	0	0	0	0	0	0	0	0	0	0	0	0	0.0121951	0	0.0185185	0.12848	0	0	0	0	0	0	0	0	0	0	0.00990099	0	0	0.0305677	0	0	0	0	0	0	0	0	0
MGT-v1_8	0	0	0.00990099	0	0	0	0.018018	0.017301	0	0.0684258	0.0411111	0	0	0	0	0	0.00970874	0	0.00961538	0	0	0	0	0	0	0	0	0	0	0.0151515	0	0.0136986	0	0	0	0.00990099	0	0.0362694	0.0156522	0.0114504	0	0	0.012931	0.0122699	0.0185185	0.0134228	0	0.0215517	0
MGT-v1_9	0	0.0452621	0.110692	0	0.103627	0	0.01	0	0	0.0222222	0	0	0.0162602	0.0314286	0	0	0.0367037	0	0.0335366	0	0	0	0	0	0.0273973	0	0.011811	0	0.0782609	0	0.213115	0.096463	0	0	0	0	0	0.0100334	0	0	0	0	0.0108416	0.0121951	0	0	0	0.0599369	0
MGT-v1_10	0	0	0.0138889	0	0.0162602	0	0.0173913	0	0	0.0483629	0	0.0192308	0.0420168	0.0857143	0	0	0.0477586	0	0.0394737	0	0	0	0	0	0.0255102	0	0.0113636	0	0.0387597	0.0117647	0.0811966	0.0486726	0	0	0	0	0	0.0183254	0.020202	0	0	0	0.0330882	0.0532787	0.0331126	0	0	0.0586081	0
MGT-v1_11	0	0	0	0	0	0	0	0	0	0	0	0	0	0	0	0	0	0	0	0.00961538	0	0	0	0	0	0	0	0	0	0	0	0	0	0	0	0	0	0	0	0	0	0	0	0	0	0	0	0	0
MGT-v1_12	0	0	0	0	0	0	0.120915	0	0	0.0459194	0.00961538	0.0328947	0.0324675	0.0836252	0	0	0.0359589	0	0.0438931	0	0	0	0	0	0	0	0	0	0.0308789	0.0530973	0.0412114	0.233142	0	0	0	0	0.0114943	0.0158311	0.045584	0	0	0	0.0979381	0.123956	0.120482	0	0	0.0831185	0
MGT-v1_13	0	0	0	0	0	0	0	0	0	0	0	0	0	0	0	0	0	0	0	0	0	0	0	0	0	0	0	0	0	0	0	0	0	0	0	0	0	0	0	0	0	0	0	0	0	0	0	0	0
MGT-v1_14	0	0	0	0	0	0	0.0513834	0.07	0	0.0294118	0.0108696	0.0300752	0.0645161	0.173572	0.0454545	0	0.027027	0	0.0434783	0	0	0	0.0112994	0	0.0125	0	0.0114286	0.0132275	0.0442478	0.0572917	0.0818182	0.103604	0.0134228	0	0	0	0.0153061	0.0176211	0.0368421	0	0	0	0.141274	0.128883	0.09699	0.0587957	0.0165017	0.0731707	0
MGT-v1_15	0.0139276	0	0	0	0	0.0573248	0	0	0.012987	0	0	0	0	0	0	0.0364583	0	0	0	0	0	0.0673575	0	0	0	0	0	0.0192308	0	0	0	0	0	0.0241379	0.0146341	0	0	0	0	0	0	0.0458716	0	0	0	0	0	0	0.0310078
MGT-v1_16	0	0.012945	0.0136986	0	0.0146444	0	0.00990099	0.0233004	0	0.0104167	0.0173228	0	0	0	0	0	0	0	0	0.00961538	0	0	0.0193843	0	0.0315315	0.369791	0	0	0.0167598	0.0108108	0.012766	0.0122699	0	0	0	0.0118343	0.0119522	0.0133333	0.0125	0.0121581	0	0	0	0	0	0.010101	0	0	0
MGT-v1_17	0	0	0	0	0	0	0	0	0	0	0	0	0	0	0	0	0	0	0	0	0	0	0	0	0	0	0	0	0	0	0	0	0	0	0	0	0	0	0	0	0	0	0	0	0	0	0	0	0
MGT-v1_18	0	0.0852713	0.0662983	0	0.360765	0	0.00925926	0.0185185	0	0.0170455	0.12766	0.0121212	0.0849057	0.156134	0.0528634	0	0.0232558	0.00990099	0.0169492	0.00966184	0	0	0.165338	0	0.027027	0.016532	0.0174808	0.0123457	0.104298	0.0289256	0.300164	0.0865385	0.0228137	0	0	0	0	0.0221519	0.0115942	0.0294118	0	0	0.127389	0.0827068	0.0346821	0.0538851	0.0183486	0.119718	0
MGT-v1_19	0	0.00990099	0.0150574	0	0.0202312	0	0.00990099	0.0115274	0	0.0308219	0.026738	0	0	0	0	0	0	0	0	0	0	0	0.010101	0	0.153483	0.170689	0	0	0	0	0.01	0	0	0	0	0.029703	0.0120482	0.0685579	0.0191896	0.114943	0	0	0.0196078	0.0152091	0.0102041	0.0317797	0.0122699	0.0353982	0
MGT-v1_20	0	0	0	0	0	0	0	0	0	0	0	0	0	0	0	0	0.0309735	0	0.0285714	0	0	0	0	0	0	0	0	0	0	0	0	0	0	0	0	0	0	0	0	0	0	0	0	0	0	0	0	0	0
MGT-v1_21	0	0	0	0	0	0	0	0	0	0	0	0	0	0	0	0	0	0	0	0	0	0	0	0	0	0	0	0	0	0	0	0	0	0	0	0	0	0	0	0	0	0	0	0	0	0	0	0	0
MGT-v1_22	0	0	0	0	0	0	0	0	0	0	0	0	0	0	0	0	0	0	0	0.0120192	0	0	0	0	0	0	0	0	0	0	0	0	0	0	0	0	0	0	0	0	0	0	0	0	0	0.01	0	0	0
MGT-v1_23	0	0	0	0	0	0	0	0	0	0	0	0	0	0.00990099	0.00980392	0	0	0	0	0	0	0	0	0	0	0	0	0	0	0	0	0	0	0	0	0	0	0	0	0	0	0	0	0	0	0	0	0	0
MGT-v1_24	0	0	0	0	0	0	0	0	0	0	0	0	0	0	0	0.0455927	0	0	0	0	0	0.0116279	0	0	0	0	0	0	0	0	0	0	0	0	0	0	0	0	0	0	0	0	0	0	0	0	0	0	0
MGT-v1_25	0	0	0	0	0	0	0	0	0	0	0	0	0	0	0	0	0	0	0	0	0	0	0	0	0	0	0	0	0	0	0	0	0	0	0	0	0	0	0	0	0	0	0	0	0	0	0	0	0
MGT-v1_26	0	0	0	0	0	0	0	0	0	0	0	0	0	0	0	0	0	0	0	0	0	0	0	0	0	0	0	0	0	0	0	0	0	0	0	0	0	0	0	0	0	0	0	0	0	0	0	0	0
MGT-v1_27	0	0	0.00990099	0	0	0	0.0227273	0.0201077	0	0.126697	0.0432747	0	0	0	0	0	0.0187091	0	0.0151515	0	0	0	0	0	0	0	0	0	0	0.0234375	0	0.0261361	0	0	0	0.00990099	0.00990099	0.0508982	0.0247934	0.0125	0	0	0.0141509	0.0185185	0.0373535	0.016129	0	0.0327662	0
MGT-v1_28	0	0	0	0	0	0	0	0	0	0	0	0	0	0	0	0	0	0	0	0	0	0	0	0	0	0	0	0	0	0	0	0	0	0	0	0	0	0	0	0	0	0	0	0	0	0	0	0	0
MGT-v1_29	0.00990099	0	0	0	0	0	0	0	0	0	0	0	0	0	0	0	0	0	0	0	0	0	0	0	0	0	0	0.0119332	0	0	0	0	0	0	0	0	0	0	0	0	0	0	0	0	0	0	0	0	0
MGT-v1_30	0	0	0	0	0	0	0	0	0	0	0	0	0	0	0	0	0	0	0	0	0	0	0	0	0	0	0	0	0	0	0	0	0	0	0	0	0	0	0	0	0	0	0	0	0	0	0	0	0
MGT-v1_31	0	0	0	0	0	0	0	0	0	0	0	0	0	0	0	0	0.0121951	0.0144928	0	0.0183486	0	0	0	0	0	0	0	0	0	0	0	0	0	0	0	0	0	0	0	0	0	0	0	0	0	0	0	0	0
MGT-v1_32	0	0	0	0	0	0	0	0	0	0	0	0	0	0	0	0	0	0	0	0	0	0	0	0	0	0	0	0	0	0	0	0	0	0	0	0	0	0	0	0	0	0	0	0	0	0	0	0	0
MGT-v1_33	0	0	0	0	0	0	0.121721	0.425353	0	0.344137	0.0280374	0	0	0	0	0	0.010101	0	0.0182678	0	0	0	0.0121212	0	0	0	0	0	0	0.0223984	0.00990099	0.0294926	0	0	0	0.0196078	0.00990099	0.0331754	0.0350877	0	0	0	0.0263158	0.027027	0.0322581	0.0242424	0	0.0206897	0
MGT-v1_34	0	0	0	0	0	0	0	0	0	0	0	0	0	0	0	0	0	0	0	0	0	0	0	0	0	0	0	0	0	0	0	0	0	0	0	0	0	0	0	0	0	0	0	0	0	0	0	0	0
MGT-v1_35	0	0	0	0	0	0	0.0421687	0	0	0.0135135	0	0	0	0	0	0	0	0	0	0	0	0	0	0	0	0	0	0	0	0	0	0	0	0	0	0.0236842	0.0140845	0.0610329	0.0865484	0	0	0	0.0176678	0.0204613	0.0149254	0	0	0.0147929	0
MGT-v1_36	0.0103093	0	0	0.0212766	0	0.154636	0	0	0.0807244	0	0	0	0	0	0	0.045354	0	0	0	0	0.0236686	0.0232558	0	0.0377907	0	0	0.0567686	0.0325768	0	0	0	0	0	0.0638298	0.0493562	0	0	0	0	0	0.0376569	0.0215827	0	0	0	0	0	0	0.0105263
MGT-v1_37	0	0	0.0104167	0	0.00966184	0	0	0	0	0.0111732	0.0173913	0.0123457	0.08	0.184314	0.217029	0	0.00961538	0	0	0.00961538	0	0	0.0162602	0	0.016129	0.0333333	0	0	0	0	0	0	0	0	0	0	0	0.0119048	0.0104712	0.0110497	0	0	0.0601025	0.0452166	0.0264655	0.0141176	0.0148699	0.0431444	0
MGT-v1_38	0	0	0	0	0	0	0	0	0	0	0.01	0	0	0	0.00990099	0	0	0	0	0.011236	0	0	0	0	0	0	0	0	0	0	0	0	0	0	0	0	0	0	0	0	0	0	0	0	0	0.0169492	0	0	0
MGT-v1_39	0	0	0	0	0	0	0	0	0	0	0	0	0	0	0	0	0	0	0	0	0	0.017341	0	0	0	0	0	0	0	0	0	0	0	0	0	0	0	0	0	0	0	0	0	0	0	0	0	0	0
MGT-v1_40	0	0	0.00990099	0	0	0	0.0864346	0	0	0.0989399	0	0	0	0.0285714	0	0	0.0221729	0	0.0144928	0	0	0	0	0	0	0	0	0	0.0116959	0	0.00990099	0.0153061	0	0	0	0.0106383	0	0.0383693	0.0595238	0	0	0	0.0190476	0.153257	0.0815217	0	0	0.13738	0
MGT-v1_41	0.0904153	0	0	0.00787402	0	0.012	0	0	0	0	0	0	0	0	0	0	0	0	0	0	0	0.0358744	0	0	0	0	0	0.011236	0	0	0	0	0	0.0375335	0.0133779	0	0	0	0	0	0	0.00990099	0	0	0	0	0	0	0
MGT-v1_42	0	0	0	0	0	0	0	0	0	0	0	0	0	0	0	0	0	0	0	0	0	0	0	0	0	0	0	0	0	0	0	0	0	0	0	0	0	0	0	0	0	0	0	0	0	0	0	0	0
MGT-v1_43	0.0199336	0	0	0	0	0.0170261	0	0	0.0119048	0	0	0	0	0	0	0.0263158	0	0	0	0	0	0.0156965	0	0	0	0	0	0	0	0	0	0	0	0.0133333	0.0114613	0	0	0	0	0	0	0.0168303	0	0	0	0	0	0	0.0150376
MGT-v1_44	0	0	0	0	0	0	0	0	0	0	0	0	0	0	0	0	0	0	0	0	0	0	0	0	0	0	0	0	0	0	0	0	0	0	0	0	0	0	0	0	0	0	0	0	0	0	0	0	0.0114943
MGT-v1_45	0	0.0323223	0.0143885	0	0.0224215	0	0.00990099	0	0	0	0	0	0	0	0	0	0.0183887	0	0.0186047	0	0	0	0	0	0.00990099	0	0	0	0	0	0.00990099	0	0	0	0	0	0	0	0	0	0	0	0	0	0	0	0	0.0108303	0
MGT-v1_46	0	0.00990099	0.0343468	0	0.0177384	0	0	0	0	0	0	0	0	0	0	0	0.0144231	0	0.0147304	0	0	0	0.0121212	0	0	0	0	0	0.011655	0.0114286	0.019802	0.024735	0.00990099	0	0	0	0	0	0	0	0	0	0	0	0	0	0	0	0
MGT-v1_47	0	0	0	0	0	0	0	0.511953	0	0	0	0	0	0	0	0	0	0	0	0	0	0	0.0218579	0	0	0	0	0	0	0	0	0	0.125832	0	0	0.0520372	0.294821	0	0	0.0564103	0	0	0.558265	0	0	0.387646	1.21098	0	0
MGT-v1_48	0.0102389	0	0	0	0	0	0	0	0	0	0	0	0	0	0	0.0244243	0.010101	0	0.00961538	0	0	0.0116279	0	0	0	0	0	0	0	0	0	0	0	0	0	0	0	0	0	0	0	0	0	0	0	0	0	0	0.0151515
MGT-v1_49	0	0.0248227	0.0113636	0	0.0134048	0	0	0	0	0	0	0	0	0	0	0	0	0	0	0	0	0	0	0	0	0	0	0	0	0	0	0	0	0	0	0	0	0	0	0	0	0	0	0	0	0	0	0	0
MGT-v1_50	0	0	0	0	0	0	0	0	0	0	0	0	0	0	0	0	0	0	0	0	0	0	0	0	0	0	0	0	0	0	0	0	0	0	0	0	0	0	0	0	0	0	0	0	0	0	0	0	0
MGT-v1_51	0	0	0	0	0	0	0.0166667	0.0189269	0	0.0255591	0.00990099	0.0142349	0.0161943	0.0593607	0.023918	0	0.0127389	0	0.011976	0	0	0	0	0	0	0	0.0121951	0	0.0387409	0.0163934	0.06	0.0298507	0.0186335	0	0	0.00990099	0	0.0169492	0.0167598	0.01	0	0	0.0717489	0.0857544	0.04	0.0946124	0.0130719	0.0874182	0
MGT-v1_52	0	0	0	0	0	0	0	0	0	0	0	0	0	0	0	0	0	0	0	0	0	0	0	0	0	0	0	0	0	0	0	0	0	0	0	0	0	0	0	0	0	0	0	0	0	0	0	0	0
[truncated: 872 more rows]
[truncated: 320 more columns]
